# Supplementary material for: Elevated FBXO45 promotes liver tumorigenesis through enhancing IGF2BP1 ubiquitination and subsequent PLK1 upregulation
Source: eLife journal article supplement (doi:10.7554/elife.70715), 2021-11-15

Figure 2I

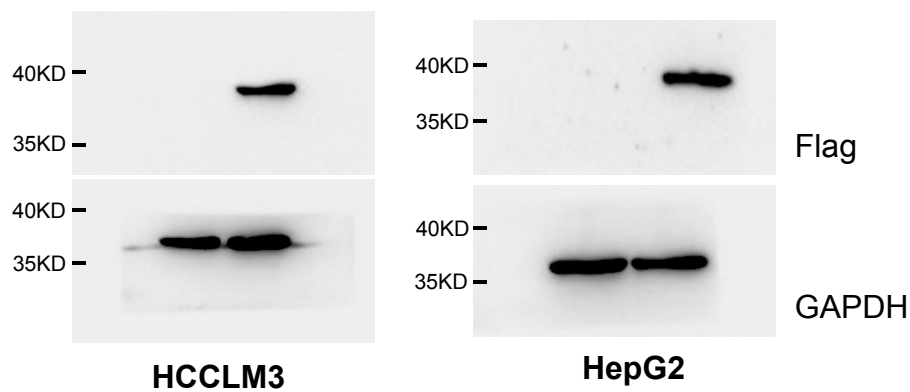

**Figure 2-figure supplement 1 source data**

**Figure 2-figure supplement 1B**

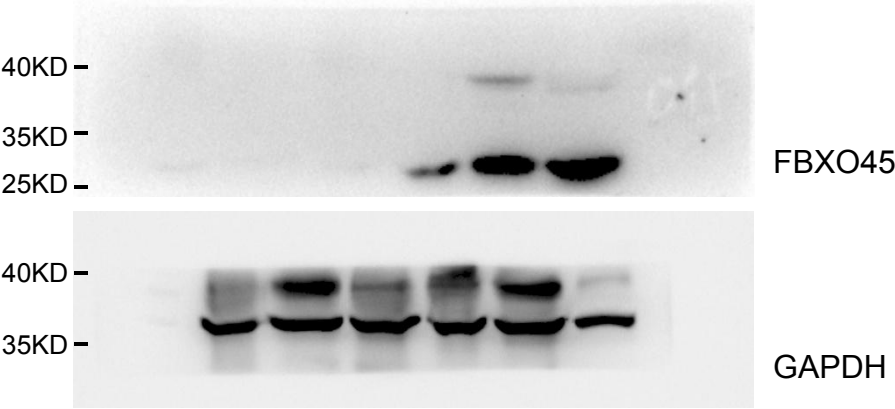

**Figure 2-figure supplement 1C**

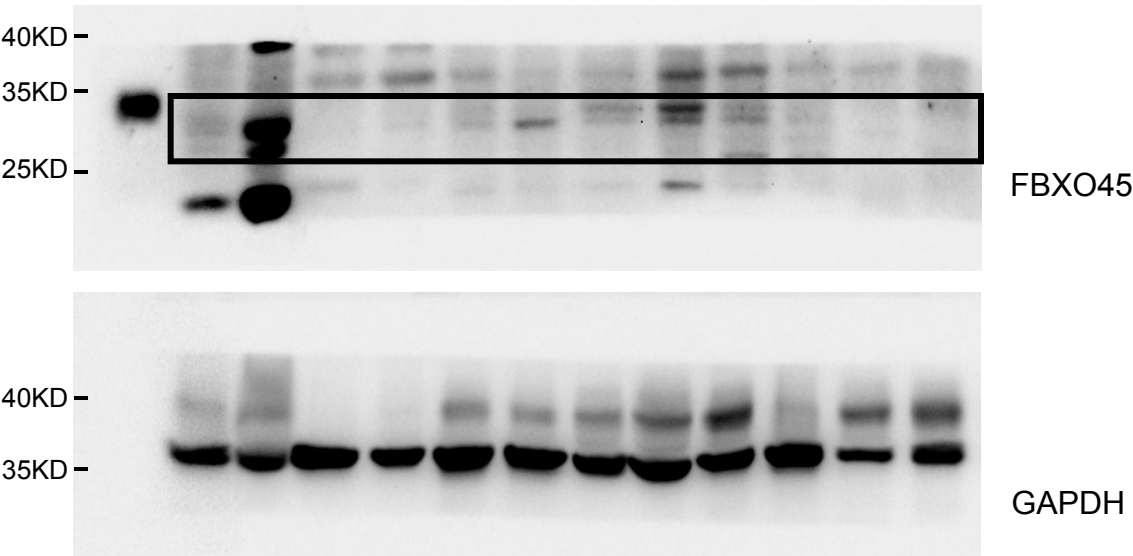

**Figure 2-figure supplement 1E**

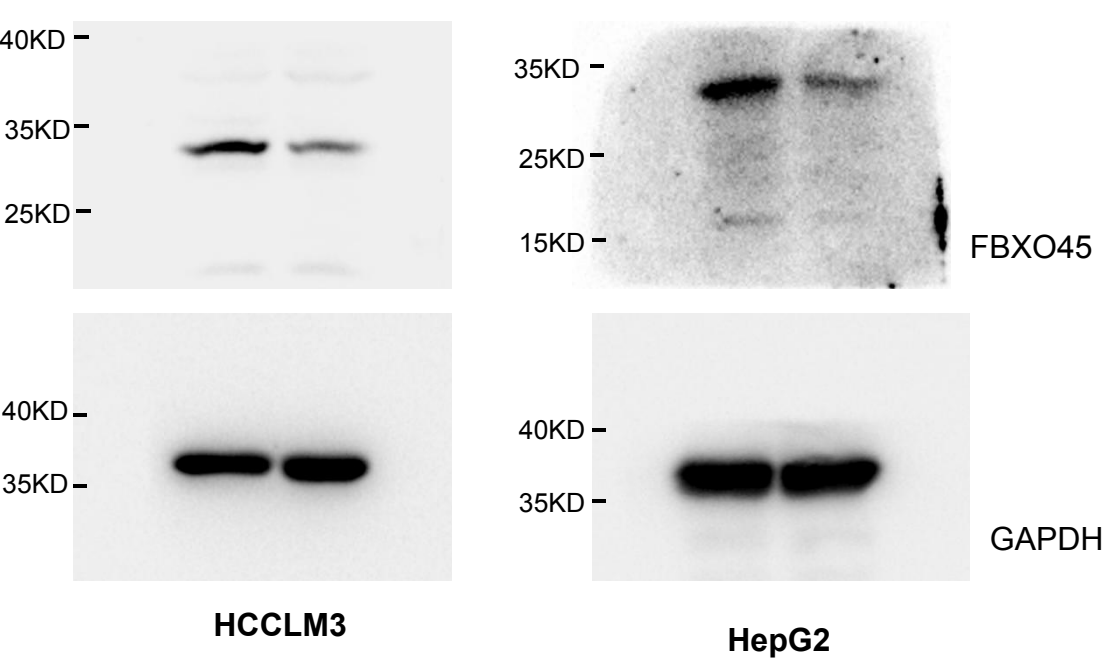

Figure 3B

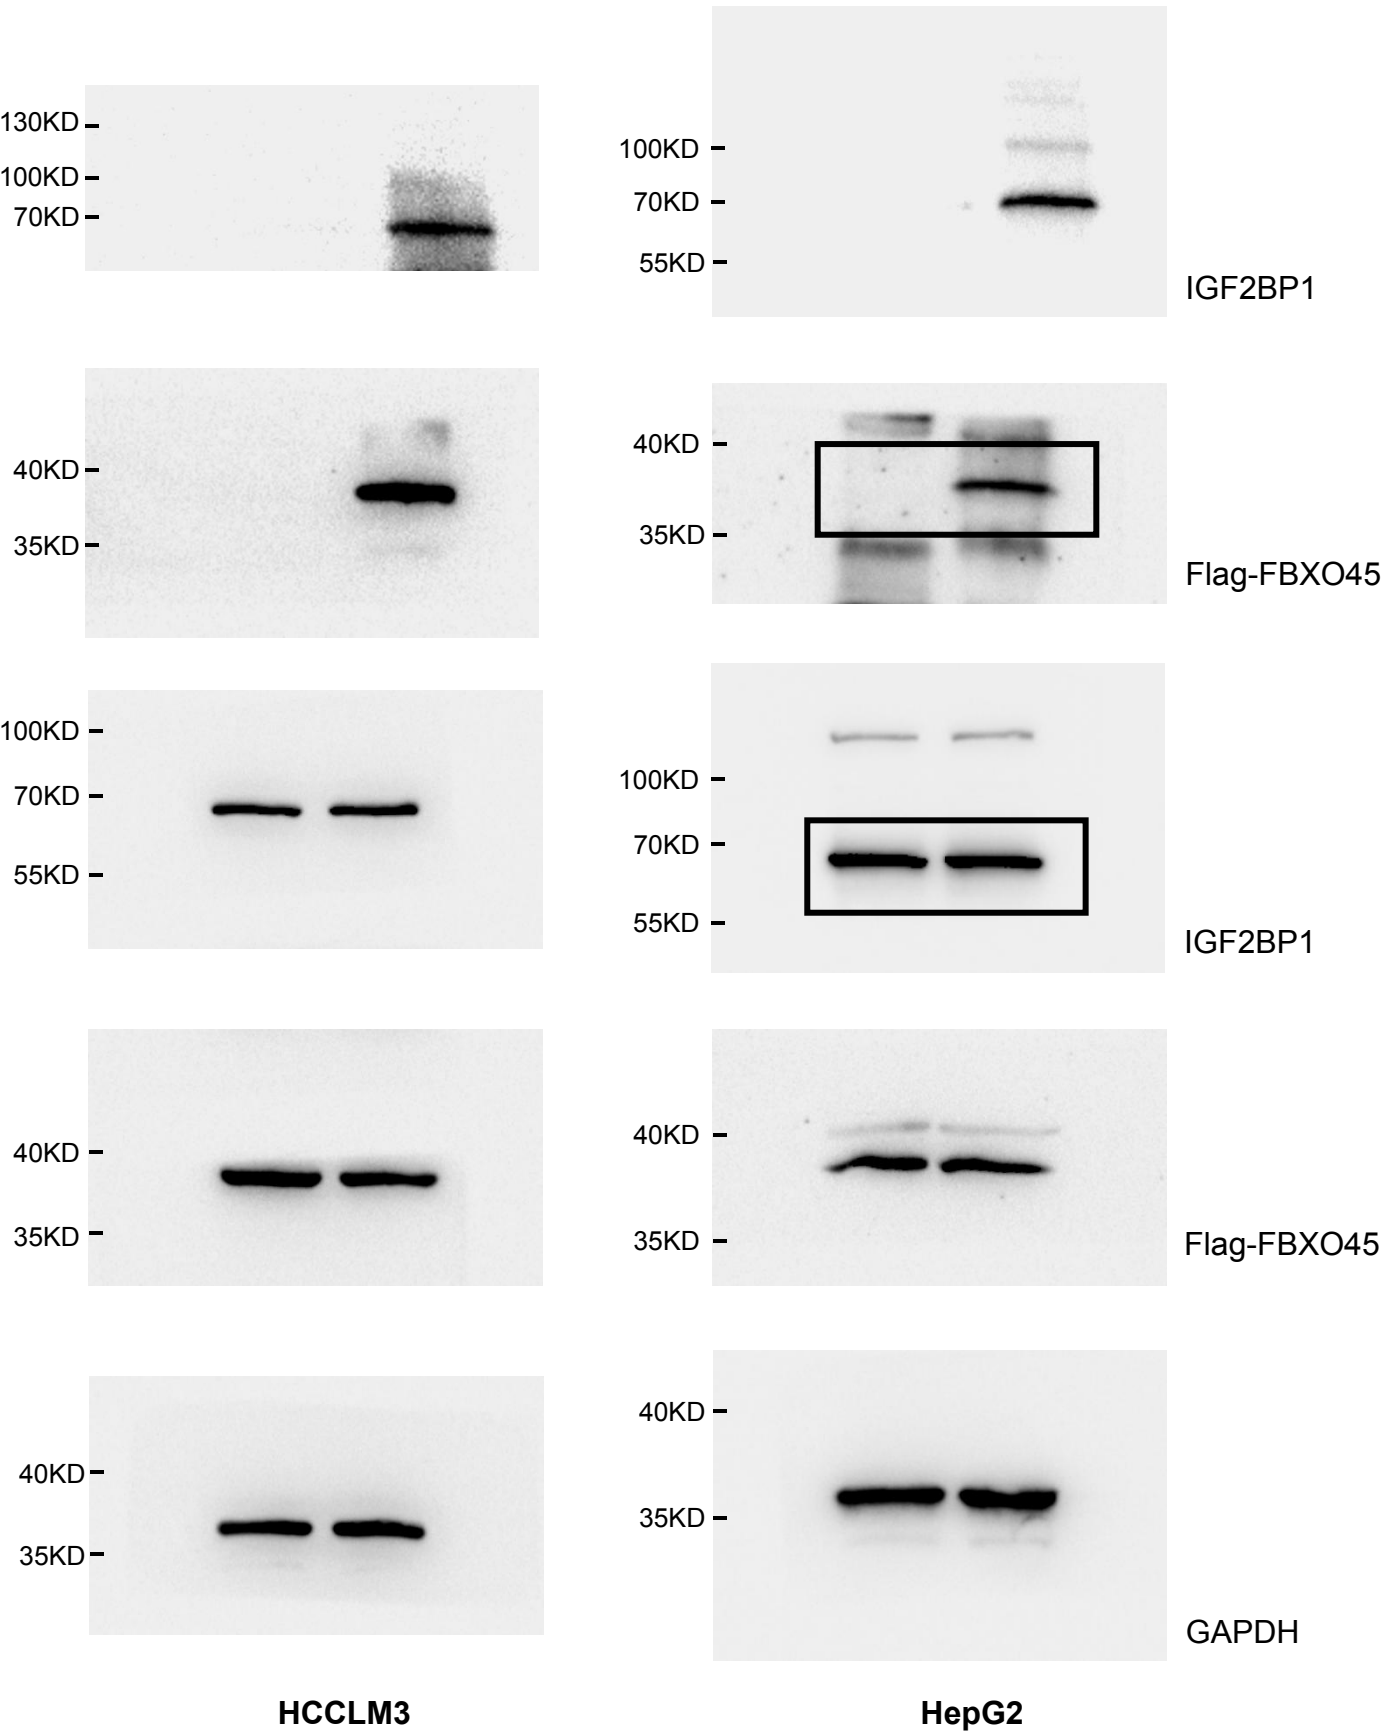

Figure 3C

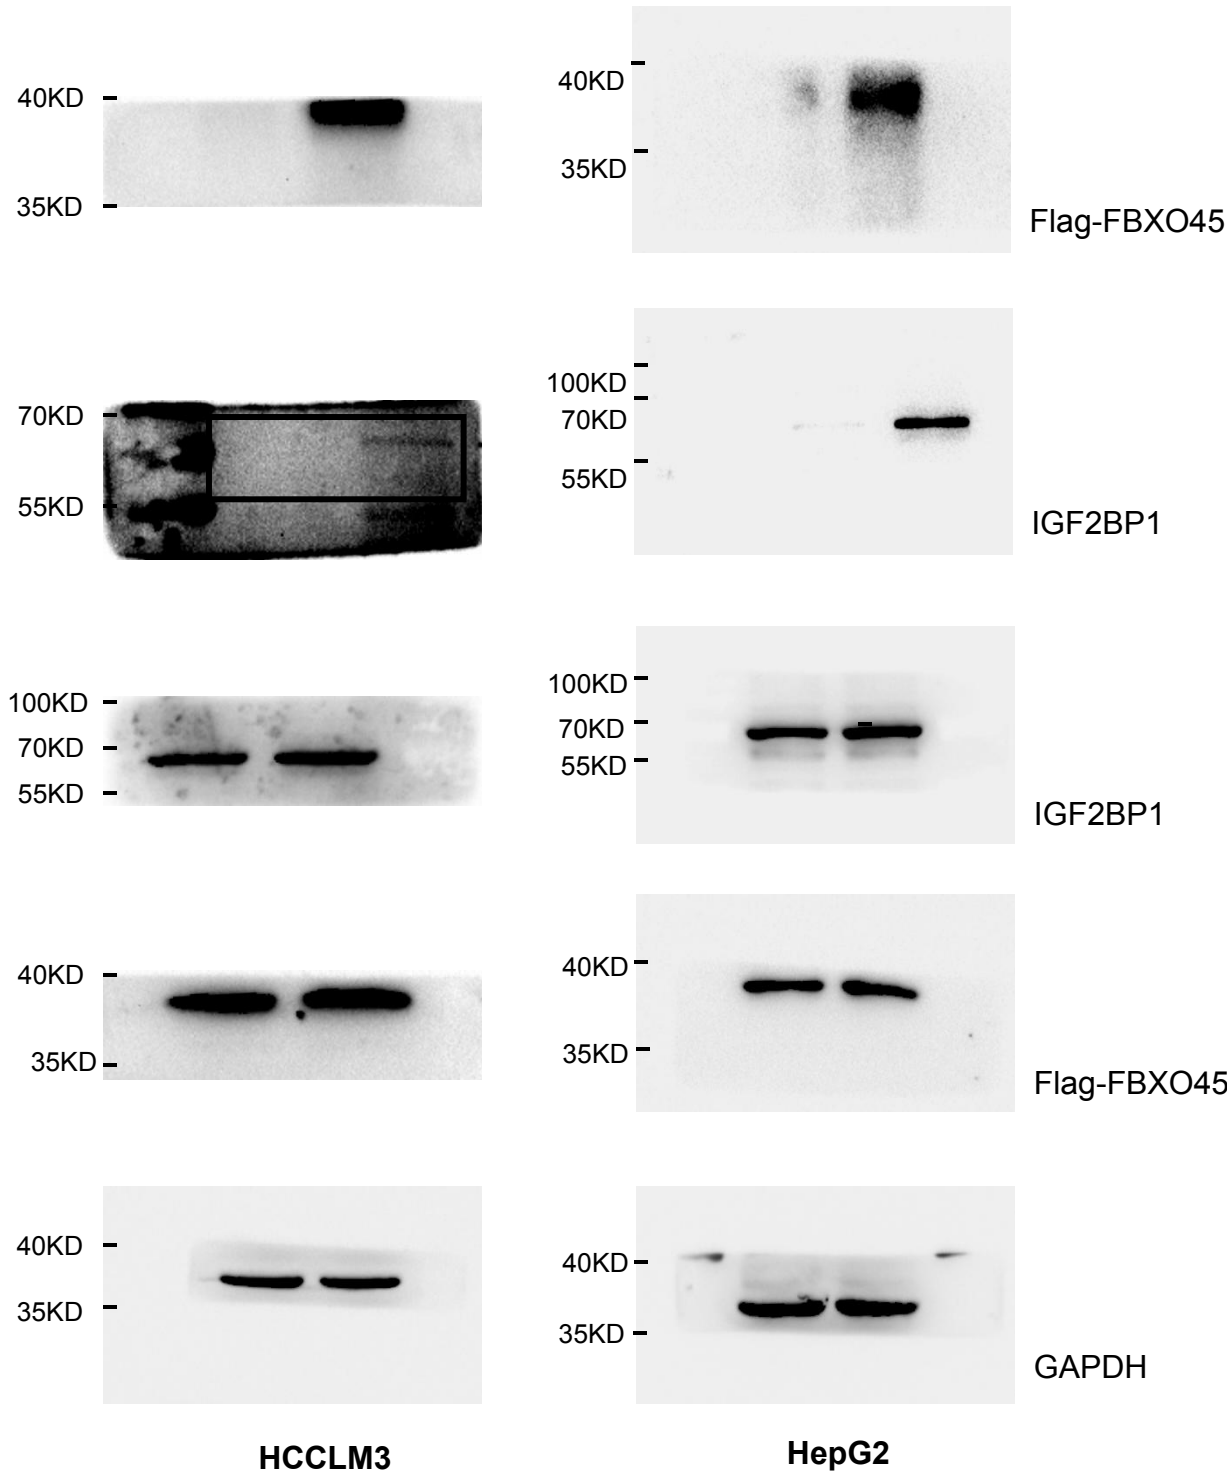

Figure 3D

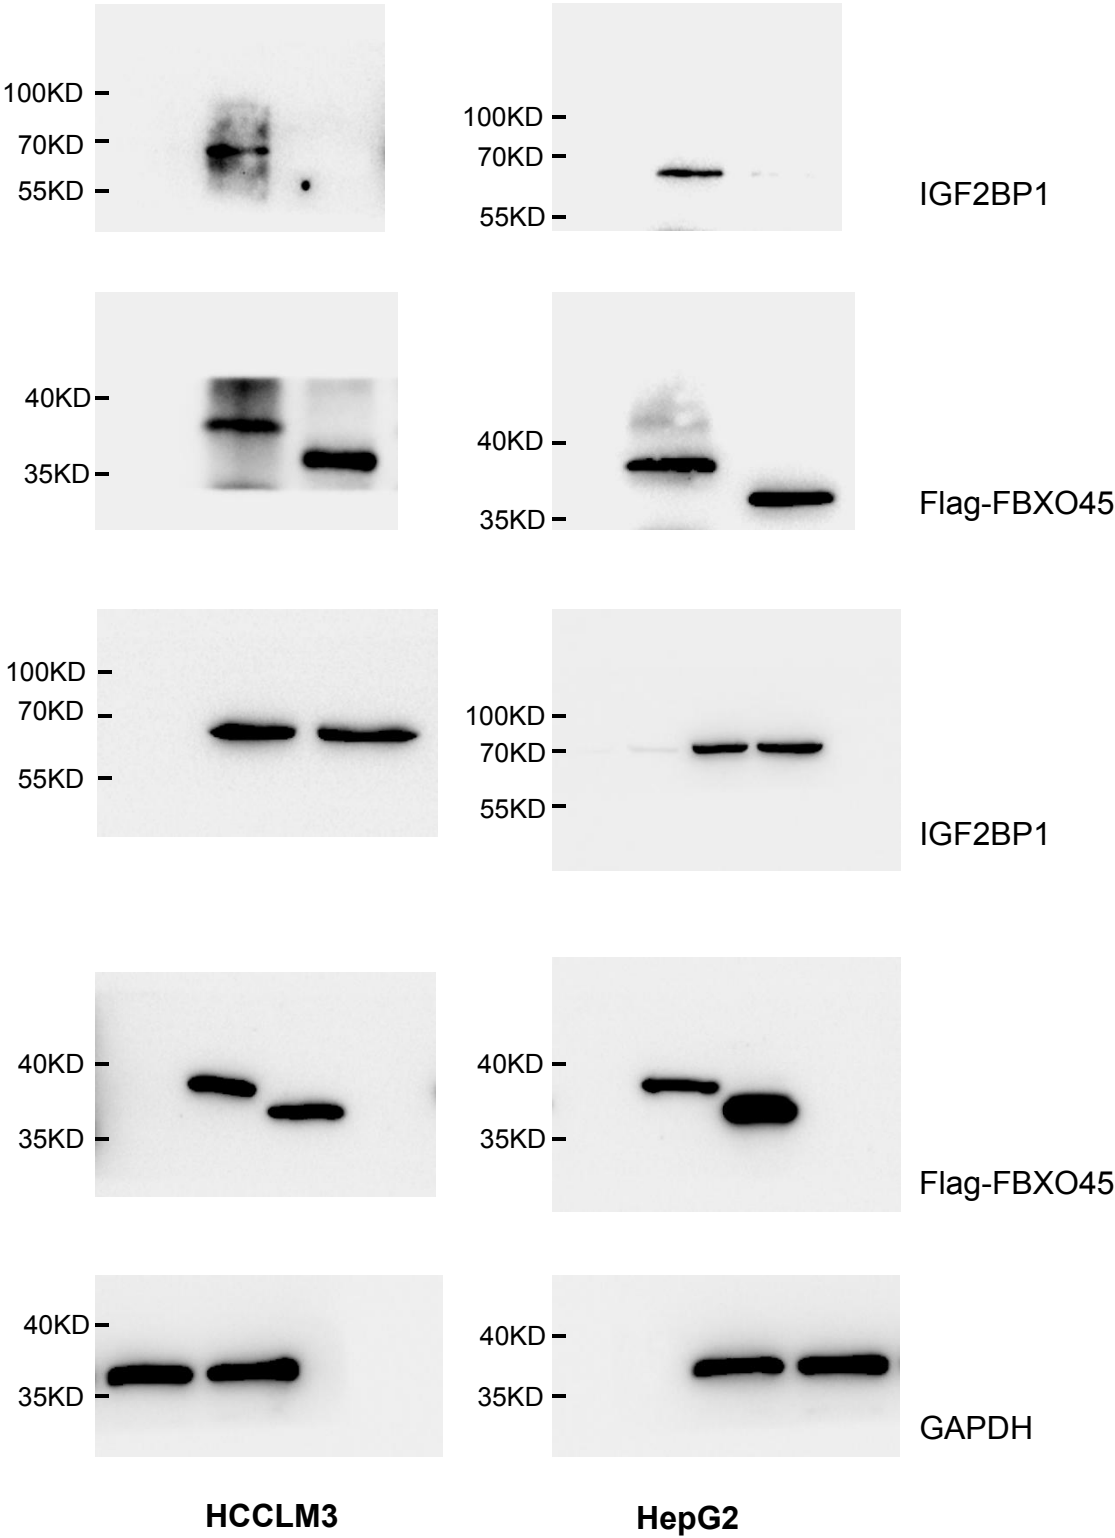

Figure 3E

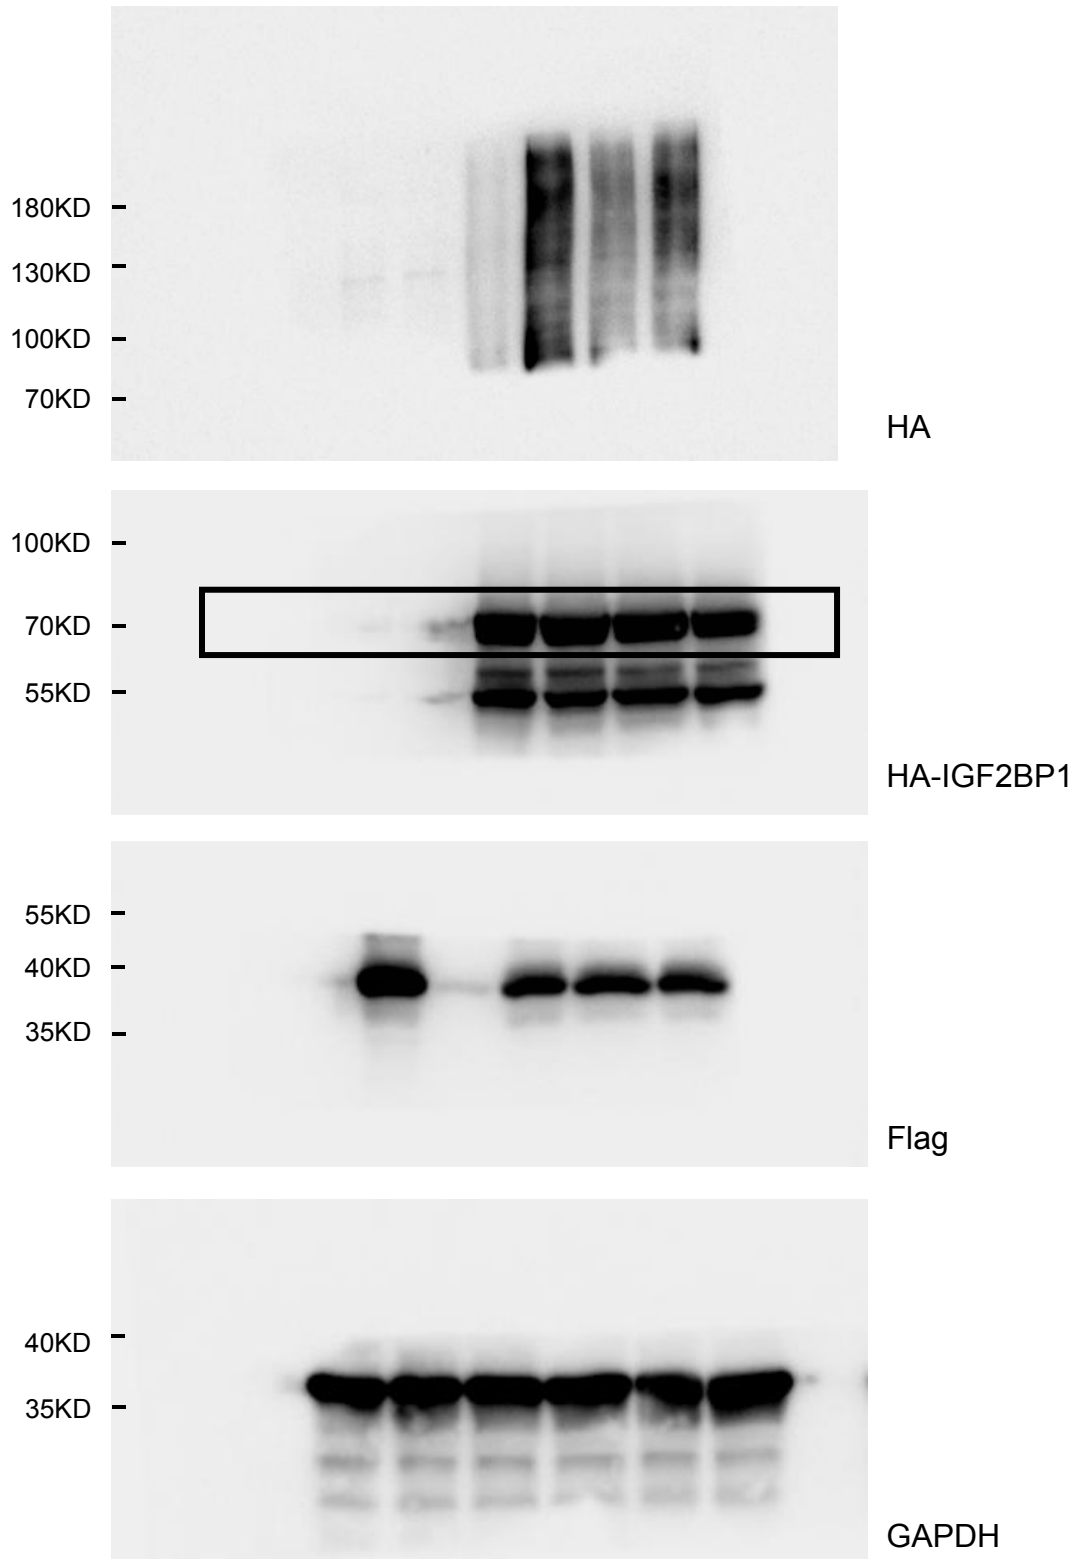

Figure 3F

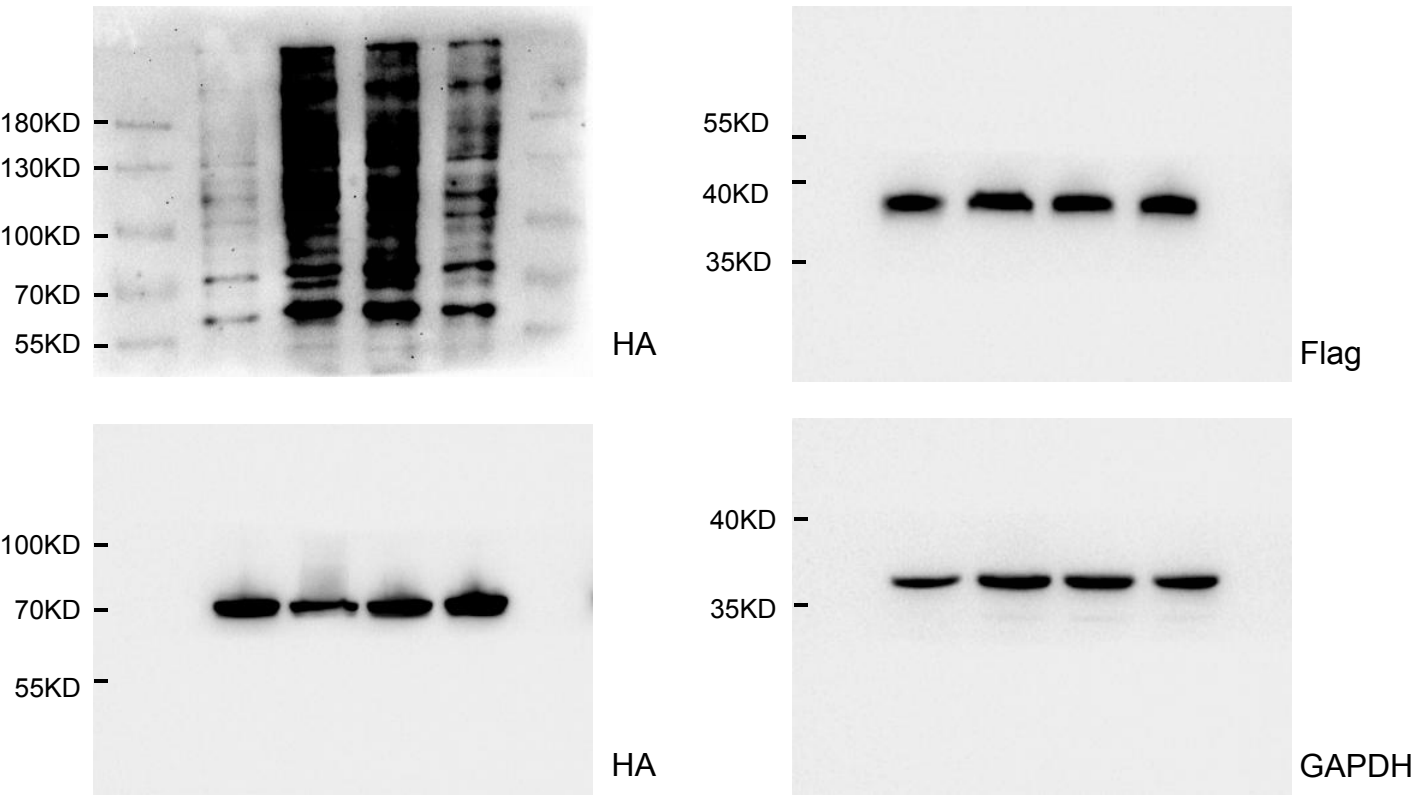

Figure 3G

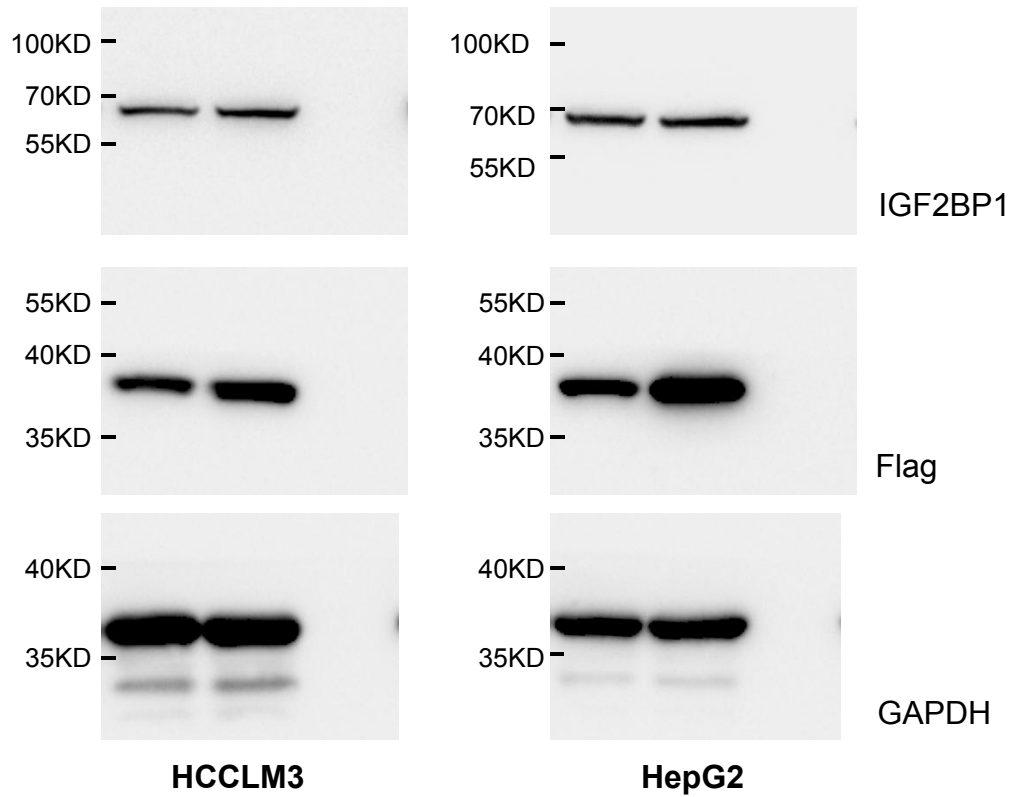

Figure 3H

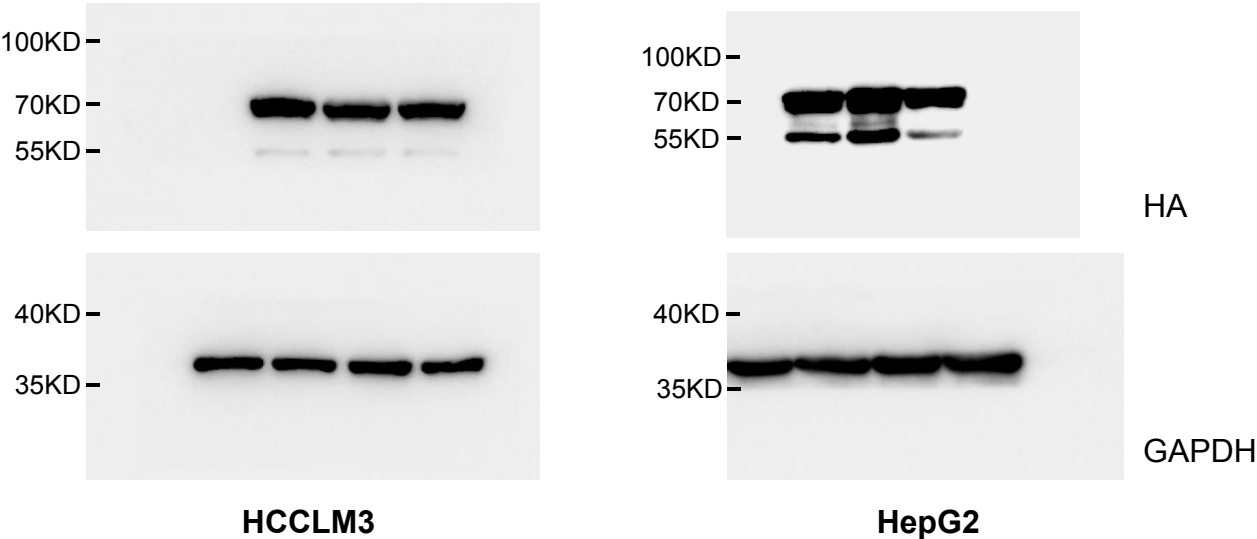

Figure 3I

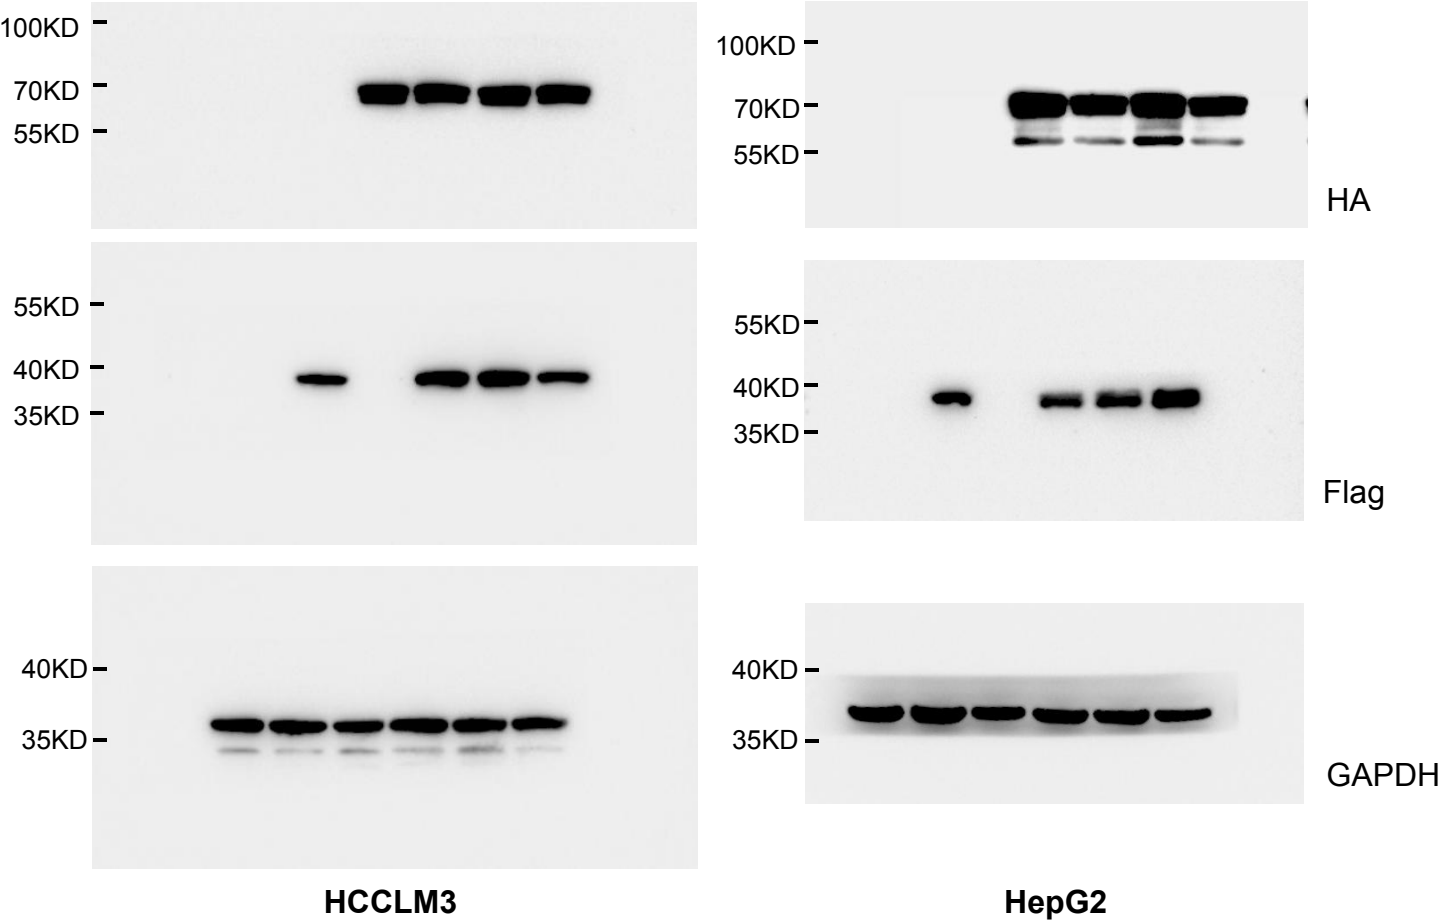

Figure 3-figure supplement 1 source data

Figure 3-figure supplement 1A

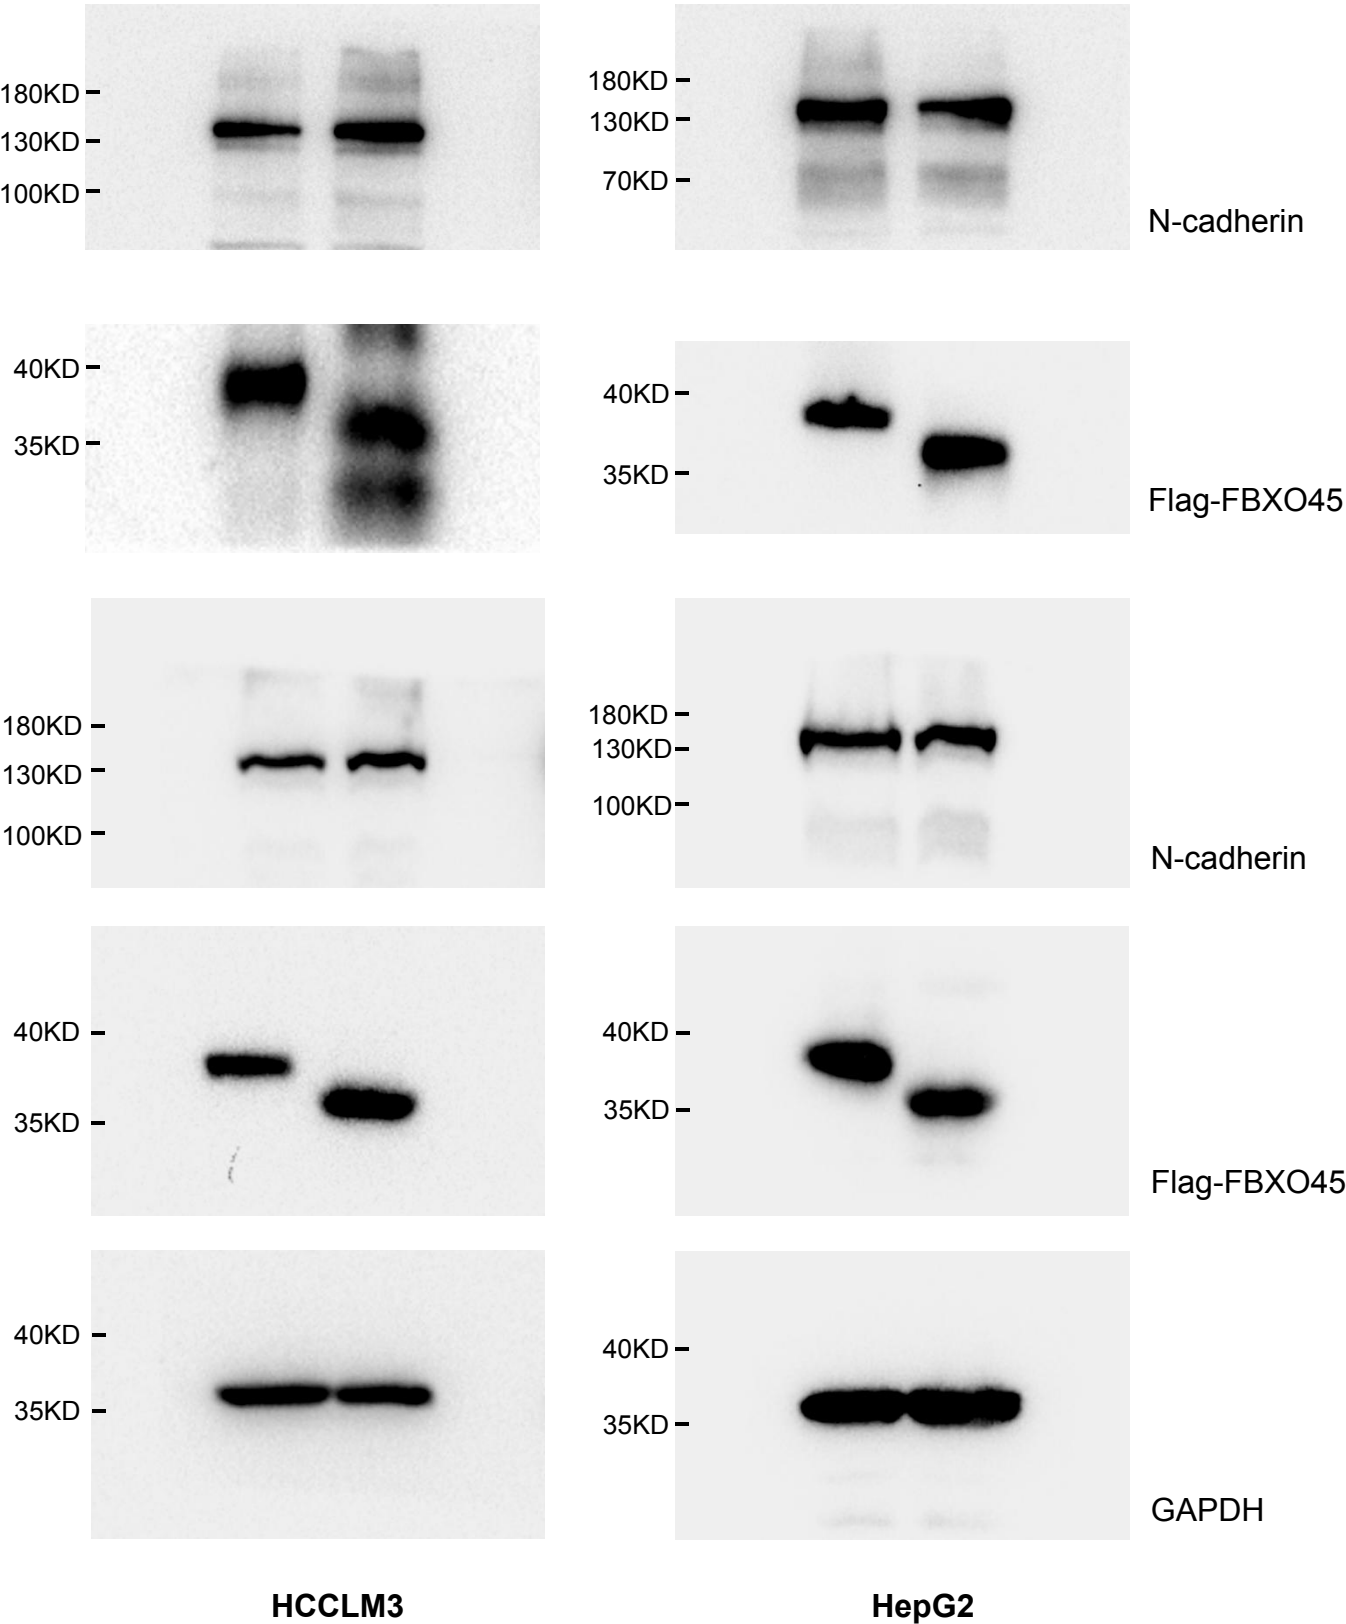

Figure 3-figure supplement 1 source data

Figure 3-figure supplement 1D

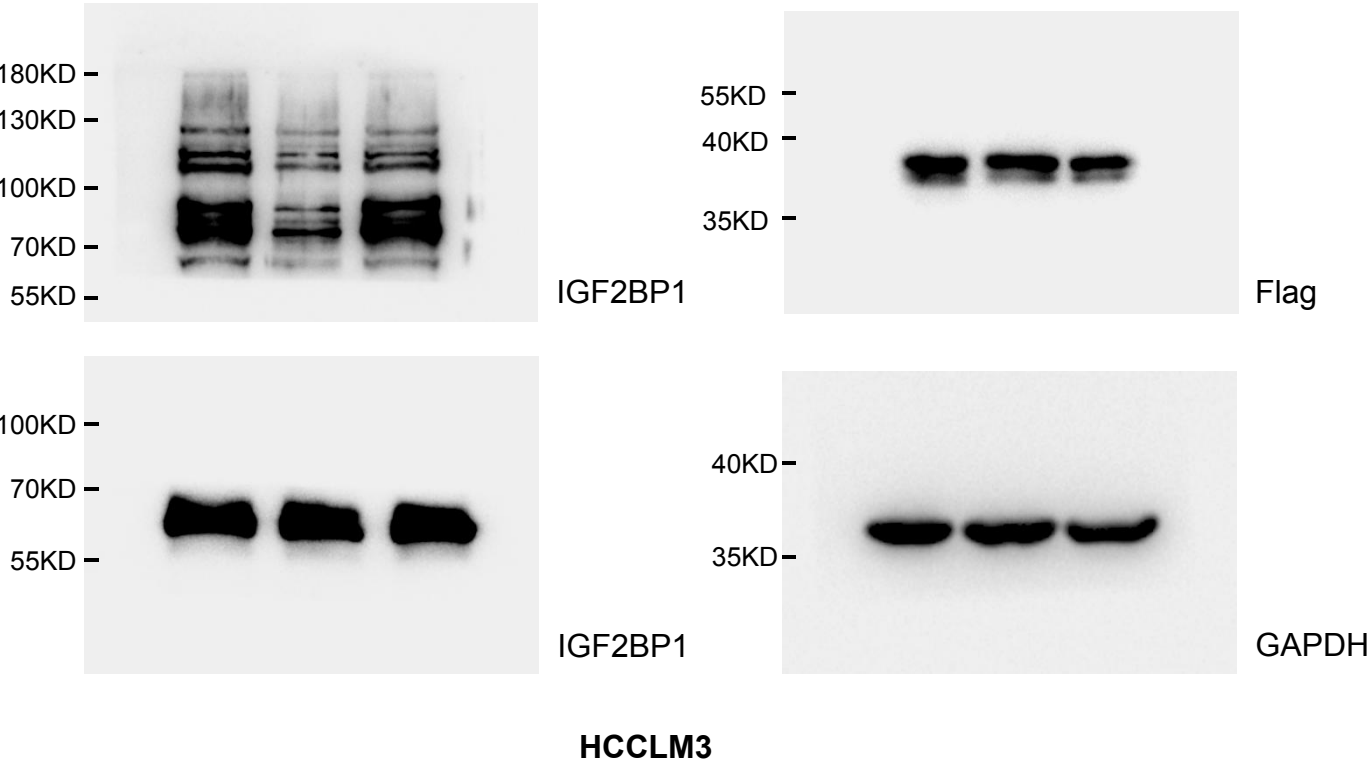

Figure 3-figure supplement 2 source data

Figure 3-figure supplement 2A

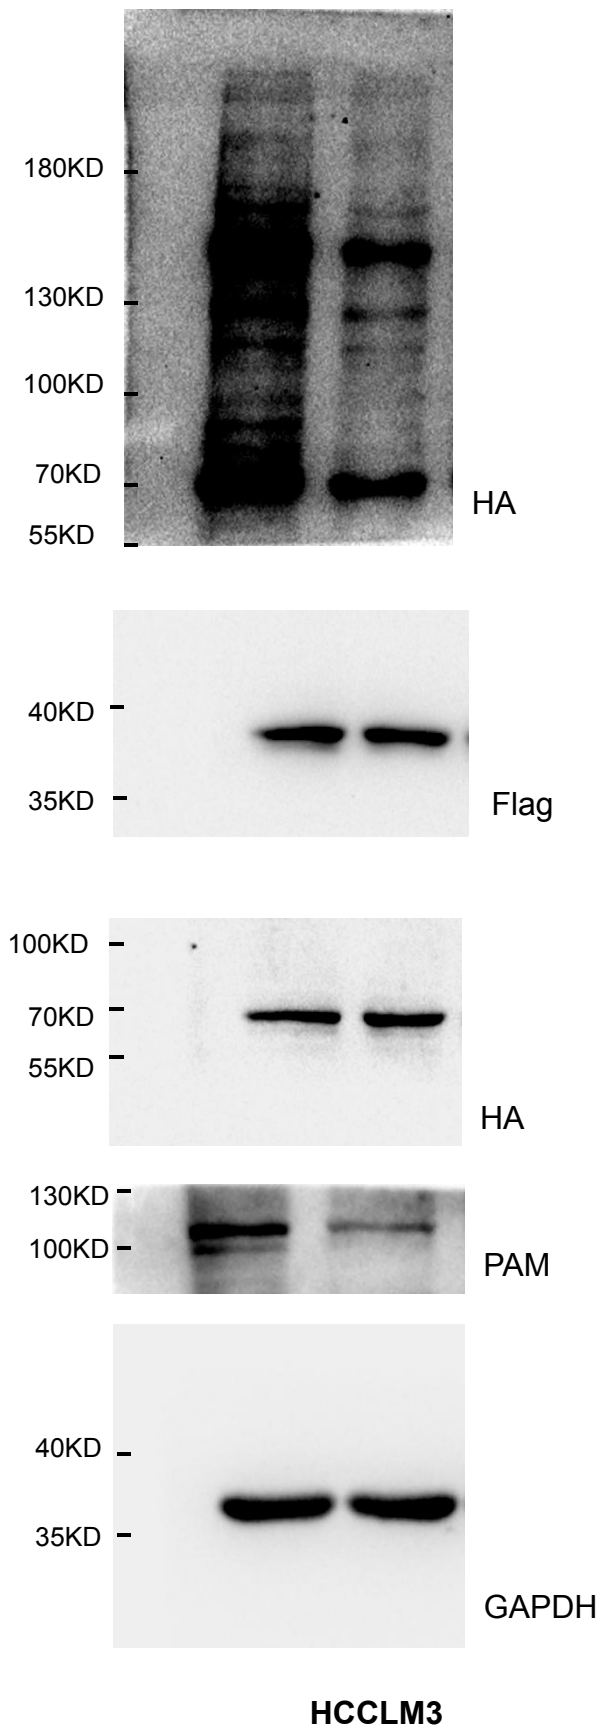

Figure 3-figure supplement 2 source data

Figure 3-figure supplement 2B

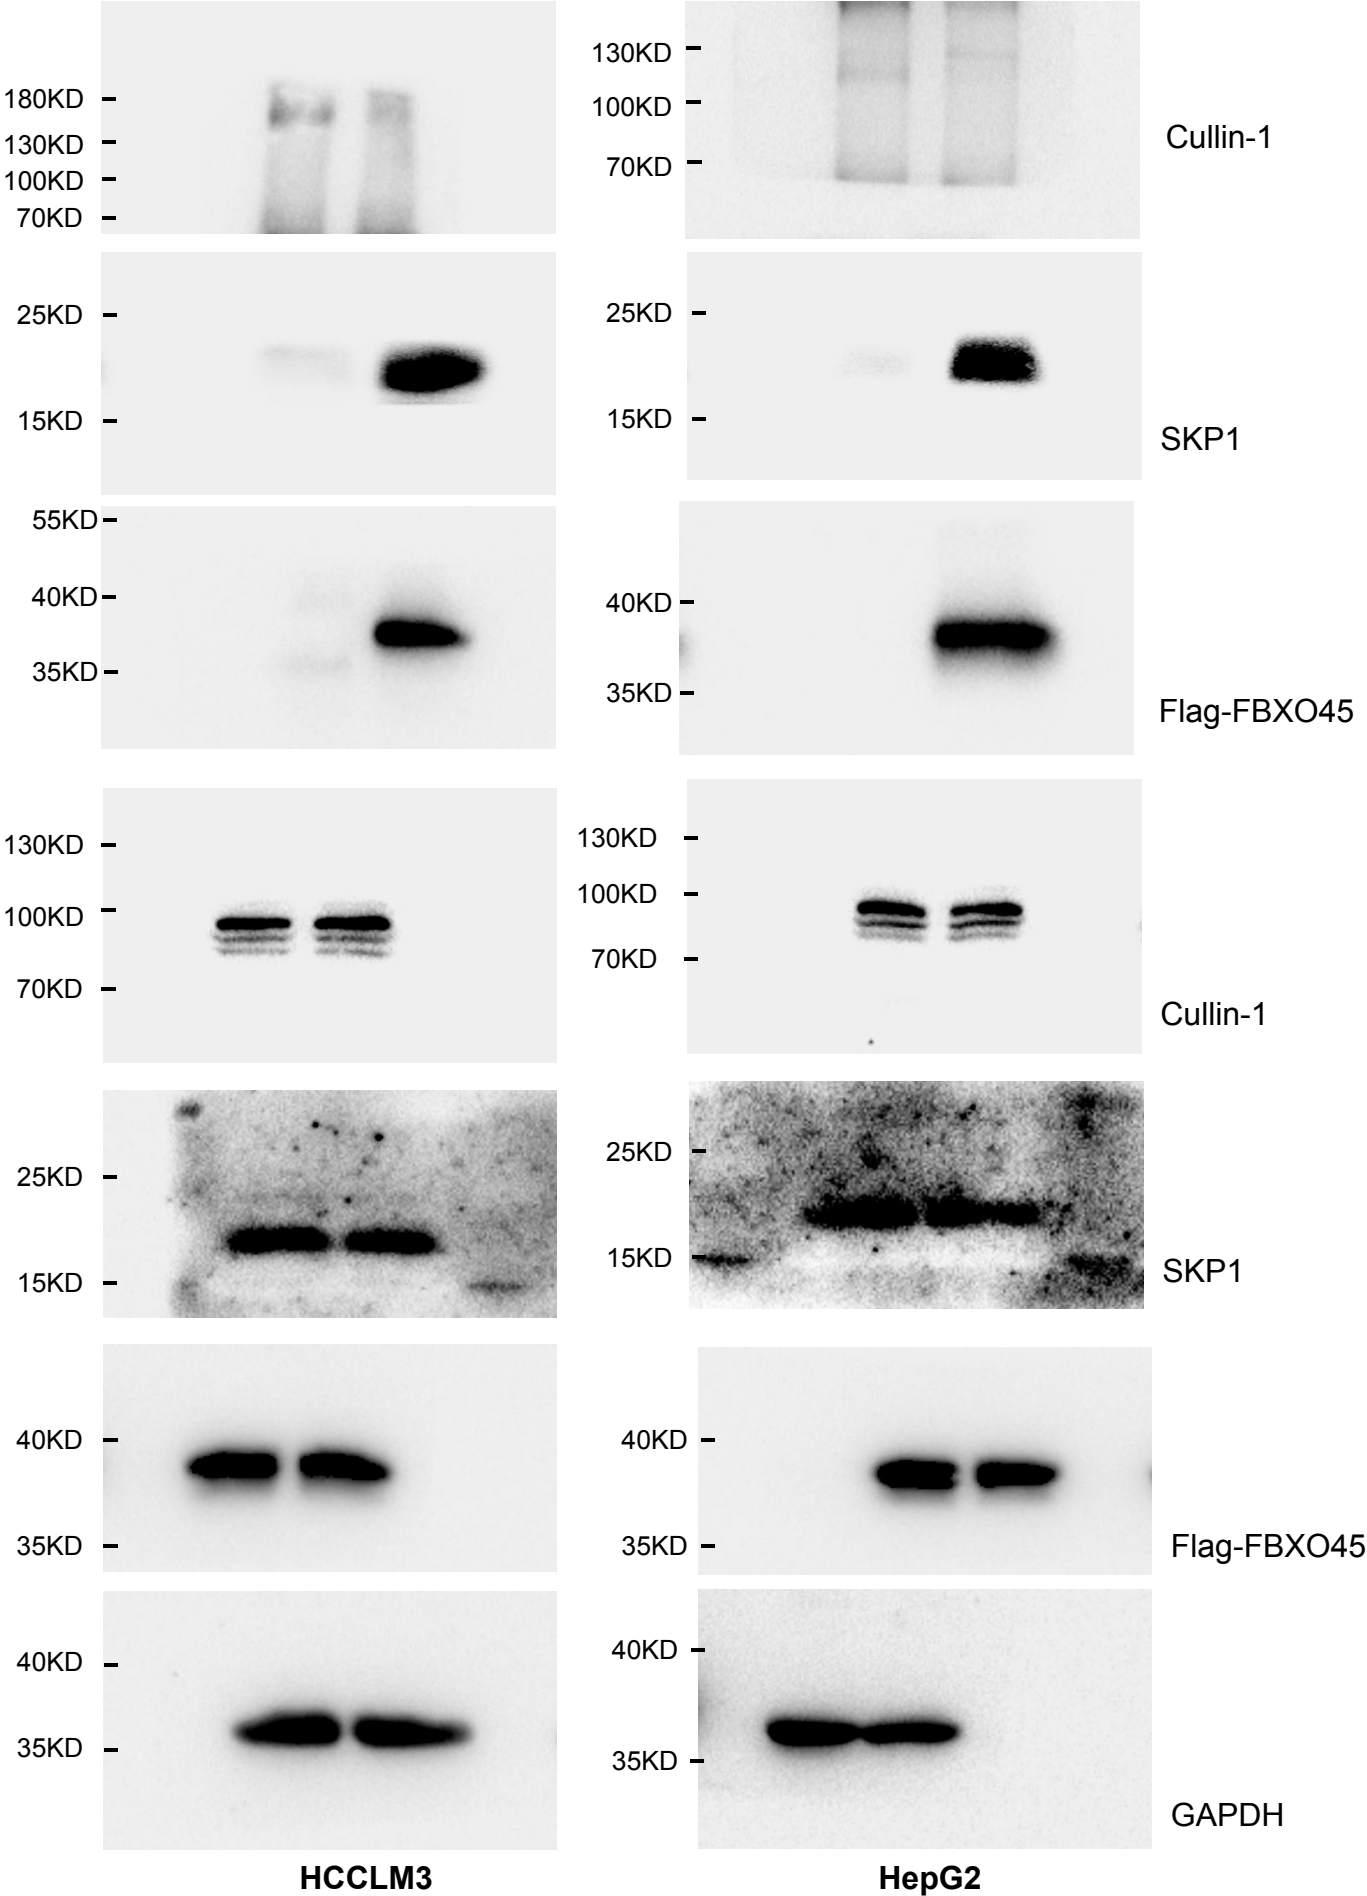

Figure 4A

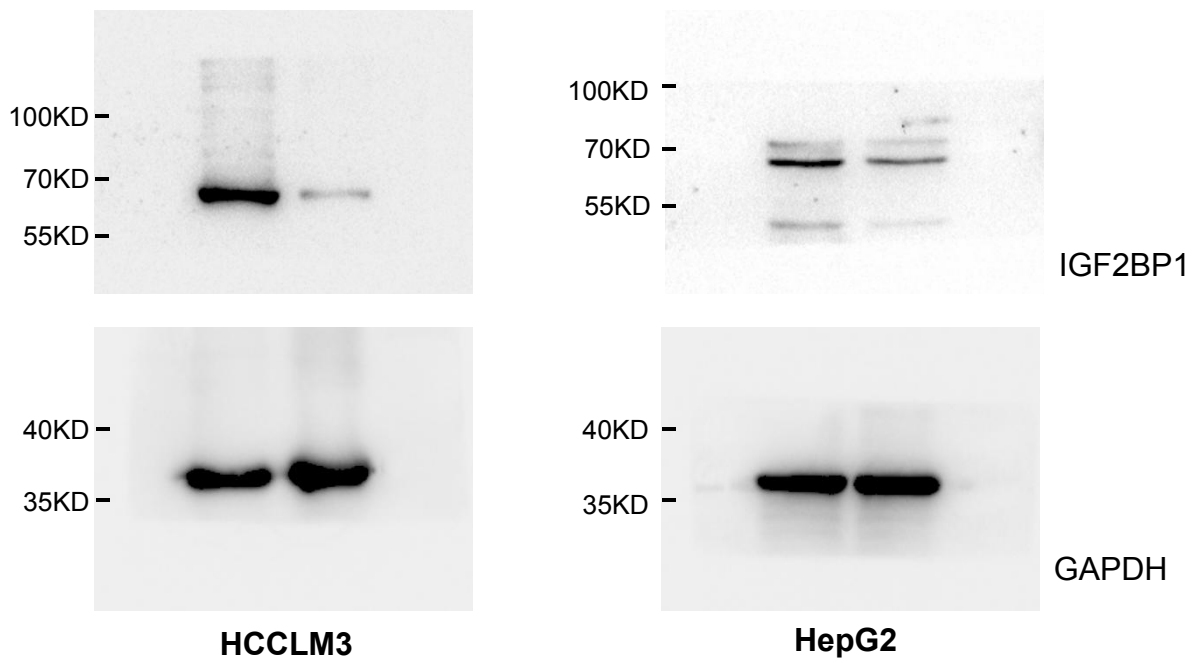

Figure 4D

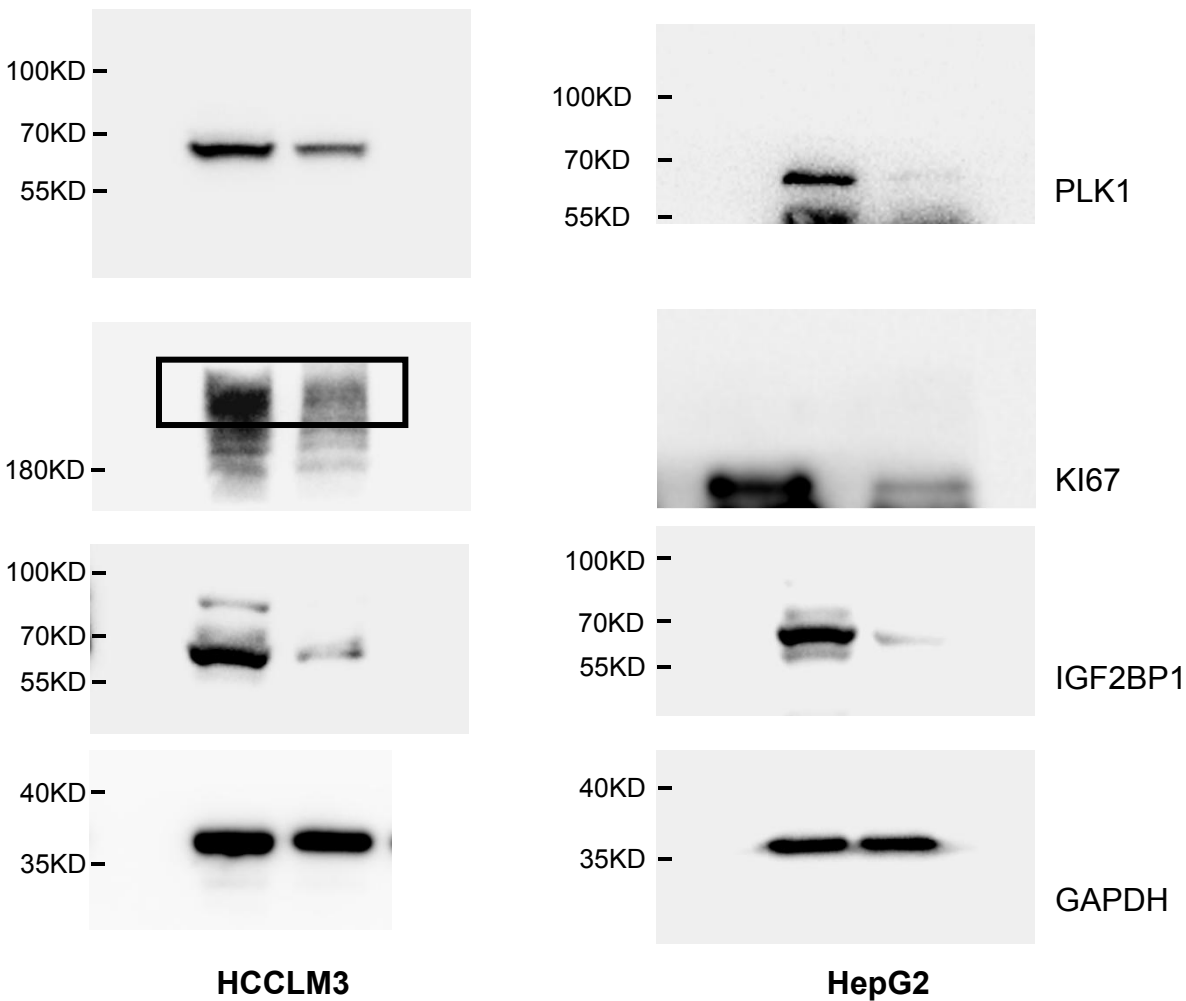

Figure 5D

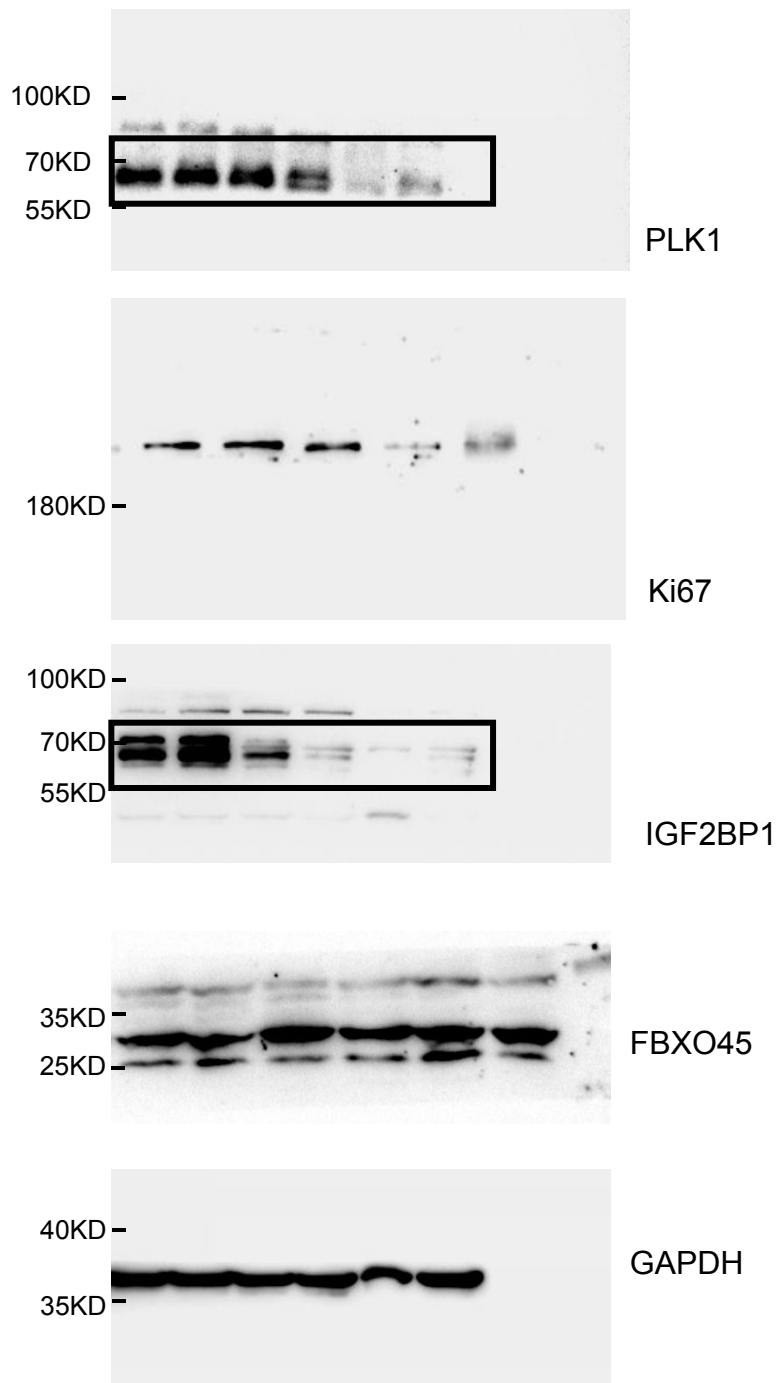

Supplement: supp [file elife-70715-supp-v1.zip › elife_poa_e70715_Source_data_1.pdf]
