# Supplementary material for: Elevated FBXO45 promotes liver tumorigenesis through enhancing IGF2BP1 ubiquitination and subsequent PLK1 upregulation
Source: eLife. 2021 Nov 15;10:e70715. doi: 10.7554/eLife.70715 (PMC8641947; doi:10.7554/eLife.70715)
Supplement: Figure 5—source data 1. [file elife-70715-fig5-data1.xls]

## Sheet: Figure 5B
Tumor number
	shVector	shIGF2BP1
	27	16
	20	10
	14	11
	18	9
	22	10
	14	5
	26

## Sheet: Figure 5C
Liver/body ratio(%)
	shVector	shIGF2BP1
	5.90828	7.42987
	6.01829	6.11246
	5.7625	6.41703
	6.06209	5.82293
	6.54265	5.18257
	5.75178	5.25664
	6.9573

## Sheet: Figure 5E
FBXO45-positive cells
	shVector	shIGF2BP1
	190	170
	178	160
	141	128
	137	132
IGF2BP1-positive cells
	shVector	shIGF2BP1
	185	28
	156	51
	123	38
	167	30
PLK1-positive cells
	shVector	shIGF2BP1
	72	10
	65	16
	53	8
	90	20
Ki67-positive cells
	shVector	shIGF2BP1
	162	54
	118	32
	171	68
	198	64
