# Supplementary material for: Elevated FBXO45 promotes liver tumorigenesis through enhancing IGF2BP1 ubiquitination and subsequent PLK1 upregulation
Source: eLife journal article supplement (doi:10.7554/elife.70715), 2021-11-15
Supplement: supp [file elife-70715-supp-v1.zip]

Archive with 23 entries (23 files):
- elife_poa_e70715_Figure_1_figure_supplement_1.pdf
- elife_poa_e70715_Figure_2_figure_supplement_1.pdf
- elife_poa_e70715_Figure_3_figure_supplement_1.pdf
- elife_poa_e70715_Figure_3_figure_supplement_2.pdf
- elife_poa_e70715_Figure_4_figure_supplement_1.pdf
- elife_poa_e70715_Figure_7_figure_supplement_1.pdf
- elife_poa_e70715_Figure_1_source_data_1.xlsx
- elife_poa_e70715_Figure_1_source_data_2.xls
- elife_poa_e70715_Figure_2_figure_supplement_1_source_data_1.xls
- elife_poa_e70715_Figure_2_source_data_1.xls
- elife_poa_e70715_Figure_3_source_data_1.xls
- elife_poa_e70715_Figure_3_source_data_2.xls
- elife_poa_e70715_Figure_4_source_data_1.xls
- elife_poa_e70715_Figure_4_figure_supplement_1_source_data_1.xls
- elife_poa_e70715_Figure_5_source_data_1.xls
- elife_poa_e70715_Figure_6_source_data_1.xls
- elife_poa_e70715_Supplementary_file_1.docx
- elife_poa_e70715_Supplementary_Ffle_2.docx
- elife_poa_e70715_Supplementary_file_3.docx
- elife_poa_e70715_Supplementary_file_4.docx
- elife_poa_e70715_Supplementary_file_5.docx
- elife_poa_e70715_Source_data_1.pdf
- elife_poa_e70715_Transparent_Reporting_File.docx
