# Supplementary material for: Elevated FBXO45 promotes liver tumorigenesis through enhancing IGF2BP1 ubiquitination and subsequent PLK1 upregulation
Source: eLife journal article supplement (doi:10.7554/elife.70715), 2021-11-15
Supplement: supp [file elife-70715-supp-v1.zip › elife_poa_e70715_Figure_1_source_data_1.xlsx]

## Sheet: 105 human HCC patients
Number	Patient ID	Age	Gender	Tumor size	Largest tumor diameter (cm)	lymph node metastasis	Vascular tumor thrombus	Intrahepatic metastasis	Metastasis (1-Present; 0-Absent)	Histologic Grade	TNM（1-Ⅰ；2-Ⅱ；3-Ⅲ；4-Ⅳ）	Recurrence (1-Present; 0-Absent)	OS（months）	Outcome（1-Dead; 0-Alive）
1	7378297	43	male	131x104mm	13.1	absent	present	absent	1	G3	3Ⅲb	1	3.6	1
2	7409550	17	female	70×50×50mm	7	absent	present	absent	1	G2	3Ⅲb	1	7.4	1
3	7793626	40	male	61x50mm	6.1	absent	absent	absent	0	G2	1	0	60	0
4	7844918	70	male	85x78mm	8.5	absent	absent	absent	0	G2	3Ⅲc	1	11.3	1
5	5167039	62	male	79x87mm	8.7	absent	absent	absent	0	G2	1	1	32.2	0
6	7561046	40	female	84x71mm	8.4	absent	absent	present	1	G2	3Ⅲc	1	8	1
7	7766456	70	male	112x69mm	11.2	absent	absent	present	1	G3	3Ⅲa	1	3.7	1
8	7579191	42	male	71x71x79mm	7.9	absent	present	absent	1	G2	4	1	25.7	1
9	6940951	42	male	66x44mm	6.6	present	absent	absent	1	G3	4Ⅳa	1	4.4	1
10	6805060	47	male	89x65mm，15×10mm	8.9	absent	present	present	1	G3	3Ⅲb	1	8.7	1
11	7108692	47	male	119x71mm	11.9	absent	present	absent	1	G2	3Ⅲb	0	0.1	1
12	7030534	35	male	161x118mm	16.1	absent	absent	absent	0	G2	3Ⅲa	1	10.2	1
13	7133036	46	male	80x71mm	8	absent	present	present	1	G1	3Ⅲb	1	13.6	1
14	7191506	40	male	49x42mm	4.9	absent	present	present	1	G2	3Ⅲb	1	15.2	1
15	7290008	37	male	90x120mm	12	absent	absent	absent	0	G2	3Ⅲa	1	60	0
16	580761	39	female	132x123mm	13.2	absent	absent	absent	0	G2	3Ⅲa	1	2.77	1
17	7249679	63	female	22x17mm	2.2	absent	absent	absent	0	G2	1	0	60	0
18	5152003	32	male	90x70mm，19x16mm	9	absent	absent	present	1	G3	3Ⅲa	1	4.9	1
19	7306710	54	male	41x43mm	4.3	absent	absent	absent	0	G2	1	1	60	0
20	7083943	71	male	25x25mm，20x20mm	2.5	absent	absent	present	1	G3	2	0	0.23	1
21	7329461	57	male	41x33mm	4.1	absent	absent	absent	0	G2	1	1	60	0
22	514897	57	male	55x53mm	5.5	absent	absent	absent	0	G2	1	0	0.7	1
23	6982569	52	male	103x69mm	10.3	absent	absent	absent	0	G2	1	1	13	1
24	6982555	73	male	49×36mm	4.9	absent	absent	absent	0	G2	1	1	60	0
25	159438	43	male	30x30mm，10x10mm	3	absent	absent	present	1	G2	2	1	15.2	1
26	3129977	54	male	90x80mm，10x20mm	9	absent	absent	present	1	G2	3Ⅲa	1	36.9	0
27	7200177	59	male	34x29mm	3.4	absent	absent	absent	0	G2	1	1	60	0
28	7202880	39	male	112x66mm	11.2	absent	absent	absent	0	G2	3Ⅲa	1	2.6	0
29	7237088	50	male	145x108mm	14.5	absent	absent	absent	0	G2	3Ⅲa	1	60	0
30	7207974	40	male	125x84mm	12.5	absent	present	absent	1	G2	3Ⅲb	1	4.4	1
31	7502404	45	male	80x69mm	8	absent	absent	absent	0	G1	1	1	60	0
32	7470601	39	male	92x86mm	9.2	absent	absent	absent	0	G3	1	1	7.4	1
33	7474438	47	male	62x52mm	6.2	absent	present	absent	1	G3	3Ⅲb	0	60	0
34	6490828	37	male	36x28mm	3.6	absent	present	present	1	G3	3Ⅲc	0	1.4	1
35	3709859	73	male	87x82mm	8.7	absent	absent	absent	0	G3	1	1	6.8	1
36	7425525	45	male	111x63mm	11.1	absent	present	present	1	G2	3Ⅲb	1	36.9	1
37	7479814	44	female	108x89mm	10.8	absent	absent	absent	0	G3	3Ⅲa	1	5.3	1
38	7376372	47	male	70x58mm	7	absent	absent	absent	0	G2	1	1	52.5	1
39	7650354	48	male	120x90x80mm	12	absent	present	absent	1	G2	3Ⅲb	0	0.3	1
40	7363475	63	male	69x57mm	6.9	absent	absent	absent	0	G2	3Ⅲc	0	60	0
41	7116660	39	male	60x50mm	6	absent	absent	absent	0	G2	1	1	60	0
42	7108723	41	male	58x47mm	5.8	absent	absent	absent	0	G2	1	1	12.1	1
43	7147095	40	male	82x83mm	8.3	absent	absent	absent	0	G2	3Ⅲa	1	3.1	1
44	7260469	45	male	102x68mm	10.2	absent	present	absent	1	G2	3Ⅲb	1	17.2	1
45	7770574	42	female	212X67mm	21.2	present	present	absent	1	G2	4Ⅳa	0	0.3	1
46	8068347	48	male	65x66mm	6.6	absent	absent	present	1	G2	1	0	0.2	1
47	7554346	35	male	72x75mm	7.5	absent	absent	absent	0	G2	1	1	17.8	1
48	7151762	57	female	23x22mm	2.3	absent	absent	absent	0	G2	1	1	14.3	1
49	8184148	69	male	59x59mm	5.9	absent	present	absent	1	G2	3Ⅲb	1	9.3	1
50	8296280	50	male	85x46mm	8.5	absent	present	absent	1	G2	3Ⅲb	1	16.6	1
51	7947085	56	male	38x23mm	3.8	absent	absent	absent	0	G2	1	1	6.03	1
52	8291174	33	female	119x110mm	11.9	absent	absent	absent	0	G3	3Ⅲa	1	4.8	1
53	8360849	41	male	113x100mm	11.3	absent	present	absent	1	G2	3Ⅲb	1	2.03	1
54	8407974	42	male	61x50mm	6.1	absent	absent	present	1	G2	3Ⅲa	1	24.5	1
55	8154416	47	male	60x50x25mm，33x23mm	6	absent	absent	present	1	G2	3Ⅲa	1	16.5	1
56	589130	42	male	63x47x50mm	6.3	absent	absent	absent	0	G2	1	1	13.4	1
57	8102720	39	male	117x86mm	11.7	absent	absent	absent	0	G2	3Ⅲa	1	2.6	0
58	6644084	45	male	Multiple 60x60x50mm	6	absent	present	absent	1	G2	3Ⅲb	1	21.4	1
59	7058281	51	male	77x50mm	7.7	absent	present	present	1	G3	3Ⅲb	0	0.23	1
60	9831352	65	male	43*73mm	7.3	absent	absent	absent	0	G2	1	0	2.9	1
61	9315145	63	male	120x90x100mm	12	absent	absent	absent	0	G2	3Ⅲa	0	60	0
62	9390548	73	female	70x50mm	7	absent	absent	absent	0	G2	1	0	60	0
63	7122323	58	female	65x42mm	6.5	absent	absent	absent	0	G1	3Ⅲc	1	20.1	1
64	7047624	44	male	55x34mm	5.5	absent	absent	absent	0	G1	1	1	3.7	1
65	7040820	50	female	86x69mm	8.6	absent	absent	present	1	G2	3Ⅲa	1	14.9	1
66	7342264	42	male	66x69x50mm	6.9	absent	absent	absent	0	G1	1	1	60	0
67	7673569	58	male	67x48mm	6.7	absent	absent	absent	0	G2	1	1	5.6	1
68	546457	61	male	25x26mm	2.6	absent	present	absent	1	G2	2	1	11.4	1
69	588437	54	male	39x22mm	3.9	absent	absent	absent	0	G2	1	0	60	0
70	7301254	52	male	40x40x30mm	4	absent	absent	absent	0	G2	1	1	16.6	1
71	2896899	54	male	30x34mm	3.4	absent	absent	absent	0	G1	1	1	60	0
72	3201096	37	female	31x30mm	3.1	absent	absent	present	1	G2	2	0	60	0
73	6736017	53	male	99×89mm	9.9	absent	absent	absent	0	G1	1	1	45.6	1
74	7601480	38	male	104x86mm，25x19mm	10.4	absent	absent	present	1	G1	3Ⅲc	1	1.9	1
75	8046343	43	male	106x87mm	10.6	absent	absent	absent	0	G2	3Ⅲa	1	60	0
76	9136920	53	male	40x32mm	4	absent	present	absent	1	G2	3Ⅲb	1	18.6	1
77	7115506	38	male	170x90mm	17	absent	present	absent	1	G1	3Ⅲb	1	3.5	1
78	7384511	56	male	62x52mm	6.2	absent	present	absent	1	G2	3Ⅲb	1	14.1	1
79	9716073	39	male	50x60mm	6	absent	absent	absent	0	G1	1	1	6.7	1
80	9324219	49	male	78x76mm	7.8	absent	absent	absent	0	G2	1	0	50.28	0
81	9422136	31	female	88x77mm	8.8	absent	absent	present	1	G3	3Ⅲa	1	21.9	1
82	9488860	38	female	119x89mm	11.9	absent	absent	present	1	G2	3Ⅲa	1	14.4	0
83	9676193	33	male	80x80x60mm，60x50x40mm	8	absent	absent	present	1	G1	3Ⅲa	1	2.3	1
84	7907430	58	male	Multiple 88x50mm	8.8	absent	present	present	1	G2	3Ⅲb	1	9.4	1
85	6516235	33	male	113x67mm	11.3	absent	present	absent	1	G2	3Ⅲb	1	24.8	1
86	6585979	33	male	57x60mm	6	absent	present	absent	1	G1	3Ⅲb	1	4.3	1
87	7531700	48	male	143x101mm	14.3	absent	absent	present	1	G1	3Ⅲa	0	0.2	1
88	7406011	39	male	96x70mm	9.6	absent	present	absent	1	G2	3Ⅲb	1	25.4	1
89	6586349	41	male	80x70mm	8	absent	present	absent	1	G2	3Ⅲb	1	12.9	1
90	8279771	55	female	97x75mm	9.7	present	absent	absent	1	G2	4Ⅳa	0	60	0
91	1901651	38	male	28x19mm	2.8	absent	absent	absent	0	G2	1	1	14.6	1
92	65897712	48	male	36x27mm	3.6	absent	absent	absent	0	G2	1	1	12.2	1
93	6217823	64	male	73x77mm	7.7	absent	present	absent	1	G2	3Ⅲc	1	10.2	1
94	6615460	34	male	93x69mm	9.3	absent	present	absent	1	G1	3Ⅲb	1	5.9	1
95	6630008	47	male	75x57mm	7.5	absent	present	present	1	G1	3Ⅲb	1	4.7	1
96	7454184	61	male	97x56mm	9.7	absent	absent	absent	0	G2	3Ⅲa	0	60	0
97	8094399	56	male	46x36mm	4.6	absent	present	absent	1	G2	3Ⅲb	1	4.7	1
98	8291798	35	male	49×22mm	4.9	absent	absent	absent	0	G2	1	0	0.3	1
99	7381128	42	male	46x39mm	4.6	absent	present	absent	1	G2	3Ⅲb	1	9.7	1
100	7774697	41	male	165x145x163mm	16.5	absent	absent	absent	0	G2	3Ⅲc	1	13.3	1
101	7609622	61	male	132x105mm	13.2	absent	absent	absent	0	G3	4	0	2.7	1
102	7907430	58	male	88x50mm	8.8	absent	present	absent	1	G3	3Ⅲb	1	9.9	1
103	8064002	56	male	111x100mm	11.1	absent	absent	absent	0	G3	3Ⅲa	1	41.5	1
104	8625122	46	female	130x70mm	13	absent	absent	absent	0	G3	3Ⅲa	1	36.8	1
105	67004	72	male	38x33mm	3.8	absent	absent	absent	0	G1	1	0	60	0
