# Supplementary material for: Elevated FBXO45 promotes liver tumorigenesis through enhancing IGF2BP1 ubiquitination and subsequent PLK1 upregulation
Source: eLife journal article supplement (doi:10.7554/elife.70715), 2021-11-15
Supplement: supp [file elife-70715-supp-v1.zip › elife_poa_e70715_Figure_1_source_data_2.xls]

## Sheet: Figure 1B
Sirius red+ area(%)
	Adjacent tissues	Cancer
	2.75	16.61
	5.29	18.66
	10.11	15.98
	6.44	14.09
	3.29	10.58
α-SMA+ area(%)
	Adjacent tissues	Cancer
	2.09	12.19
	4.43	12.75
	4.87	12.07
	3.11	20.36
	3.41	15.86
FBXO45-positive cells
	Adjacent tissues	Cancer
	8	135
	15	213
	20	204
	6	160
	4	136
