# Supplementary material for: Elevated FBXO45 promotes liver tumorigenesis through enhancing IGF2BP1 ubiquitination and subsequent PLK1 upregulation
Source: eLife journal article supplement (doi:10.7554/elife.70715), 2021-11-15
Supplement: supp [file elife-70715-supp-v1.zip › elife_poa_e70715_Figure_2_figure_supplement_1_source_data_1.xls]

## Sheet: Figure 2-figure supplement 1D
mRNA expression
		Wild type			FBXO45-OE
	Mki67	0.937354	0.95705	1.11471	1.54399	1.60956	1.64338
	Pcna	0.961483	1.03766	1.00231	1.1355	1.11214	1.05215
	Ccnb1	0.968171	1.00928	1.02337	1.06683	1.15136	1.06683

## Sheet: Figure 2-figure supplement 1F
Cell proliferation(%)
	HCCLM3			HepG2
	siCont	siFBXO45		siCont	siFBXO45
	95.4413	86.3892		112.049	70.0158
	92.4078	80.2561		93.721	77.0467
	95.5801	83.9909		95.5265	88.6267
	91.247	75.4507		95.1157	88.4421
	108.18	77.6111		100.093	86.6298
	117.143	83.2996		103.495	98.1747

## Sheet: Figure 2-figure supplement 1G
Colonies
	HCCLM3			HepG2
	siCont	siFBXO45		siCont	siFBXO45
	330	129		184	95
	296	147		182	108
	283	144		179	121
