# Supplementary material for: Elevated FBXO45 promotes liver tumorigenesis through enhancing IGF2BP1 ubiquitination and subsequent PLK1 upregulation
Source: eLife journal article supplement (doi:10.7554/elife.70715), 2021-11-15
Supplement: supp [file elife-70715-supp-v1.zip › elife_poa_e70715_Figure_2_source_data_1.xls]

## Sheet: Figure 2B
Tumor number
	Wild type	FBXO45-OE
	5	21
	8	16
	12	8
	13	9
	6	6
	14	20
	0	14
	7	18
	7	22
	20	14
	6	26
	7
	9
	2
	4
	2
	3
	0
	2
	6

## Sheet: Figure 2C
Liver/body ratio(%)
	Wild type	FBXO45-OE
	4.41926	5.30252
	4.44226	4.18675
	4.06718	5.23881
	5.06024	4.44088
	5.38333	4.2
	4.69381	6.01829
	5.54473	5.7625
	3.94152	6.06209
	5.45273	6.54265
	4.98382	5.75178
	4.51539	6.9573
	3.41568
	6.23104
	4.58232
	4.39567
	5.68041
	4.33272
	5.33333
	5.33642
	4.28623

## Sheet: Figure 2D
mRNA expression
		Wild type (n=3)						FBXO45-OE (n=3)
	Mki67	1.06807	1.04608	1.03886	0.962594	2.19619	1.91189	3.65533	3.43426	1.44393	1.52626	4.95883	5.16941
	Pcna	1.51572	1.54757	0.986233	1.01396	1.04972	1.12506	2.07053	2.01391	1.68763	1.61888	2.46229	2.37841
	Ccnb1	1.28343	1.45397	1.03168	0.96929	1.47427	1.84038	7.03719	7.97232	2	2.31338	14.723	11.7942
	Ccnb2	1.20999	1.22689	1.02811	0.972655	1.18099	1.43396	7.88986	7.78124	1.72309	2.07772	13.2232	12.3377

## Sheet: Figure 2F
mRNA expression
		Wild type (n=3)						FBXO45-OE (n=3)
	Acta2	0.624165	0.664343	1.04247	0.959264	0.806642	0.806642	2.58471	2.65737	1.10573	1.11342	1.95432	1.96791
	Timp1	2.75108	2.23457	1.04247	0.959264	3.605	3.18215	16.971	18.5713	3.74509	3.28297	13.0412	11.7533
	Col1a1	2.24233	2.15099	0.936272	1.06807	1.23114	1.21419	5.57897	4.82323	2.14355	1.91853	4.78991	4.69134
	Col1a2	1.76541	1.81504	1.05336	0.949342	1.61888	1.67597	4.24275	4.24275	2.77022	2.75108	4.82323	4.50023
	Pdgfb	2.15846	2.34567	1.02456	0.976032	1.7411	2	3.00008	3.42238	2.14355	2.11404	3.91768	3.75809
	Pdgfrb	1.00696	1.20581	0.99654	1.00347	2.06337	2.07772	2.42839	2.60268	2.27363	2.18101	2.56685	1.72907

## Sheet: Figure 2G
mRNA expression
		Wild type (n=3)						FBXO45-OE (n=3)
	Il6	0.946043	0.946043	0.967654	1.03343	2.22466	0.416184	11.5693	21.3938	11.33	22.1821	35.0671	49.1155
	Il1b	1.39474	1.41421	1.06437	0.939523	3.94493	3.63008	5.1337	5.16941	5.29636	5.11594	19.4271	16.7955
	Tnfa	1.68763	1.48968	1.06069	0.942785	4.39237	3.56771	4.06992	5.44526	2.94854	1.94531	7.49018	7.49018
	Ccl2	1.02456	0.955945	1.04608	0.955945	4.24275	4.5789	5.15153	5.18736	4.46915	4.37718	11.7533	9.81508

## Sheet: Figure 2H
Cell proliferation(%)
		Wild type					FBXO45-OE
	0	100					100
	24	98.3529	86.1033	109.417	105.043	95.3459	115.889	105.396	104.723	111.032	117.21
	48	107.484	101.256	102.46	91.5847	97.2153	138.312	118.712	129.327	119.039	113.338
	72	112.468	97.7836	95.0123	102.411	92.325	143.16	133.787	125.212	129.986	130.184
	96	102.17	97.512	96.4765	101.558	102.283	161.637	150.571	131.52	160.921	149.709

## Sheet: Figure 2J
Cell proliferation(%)
	HCCLM3			HepG2
	Vector	FBXO45		Vector	FBXO45
	105.101	155.54		116.461	159.85
	93.2515	129.618		74.4113	165.701
	111.219	166.888		113.253	158.393
	91.0878	148.07		76.1295	162.035
	96.5833	156.193		109.116	172.925
	102.758	155.404		110.628	187.455

## Sheet: Figure 2K
Colonies
	HCCLM3			HepG2
	Vector	FBXO45		Vector	FBXO45
	226	244		103	315
	164	291		116	309
	181	262		120	227
