# Supplementary material for: Elevated FBXO45 promotes liver tumorigenesis through enhancing IGF2BP1 ubiquitination and subsequent PLK1 upregulation
Source: eLife journal article supplement (doi:10.7554/elife.70715), 2021-11-15

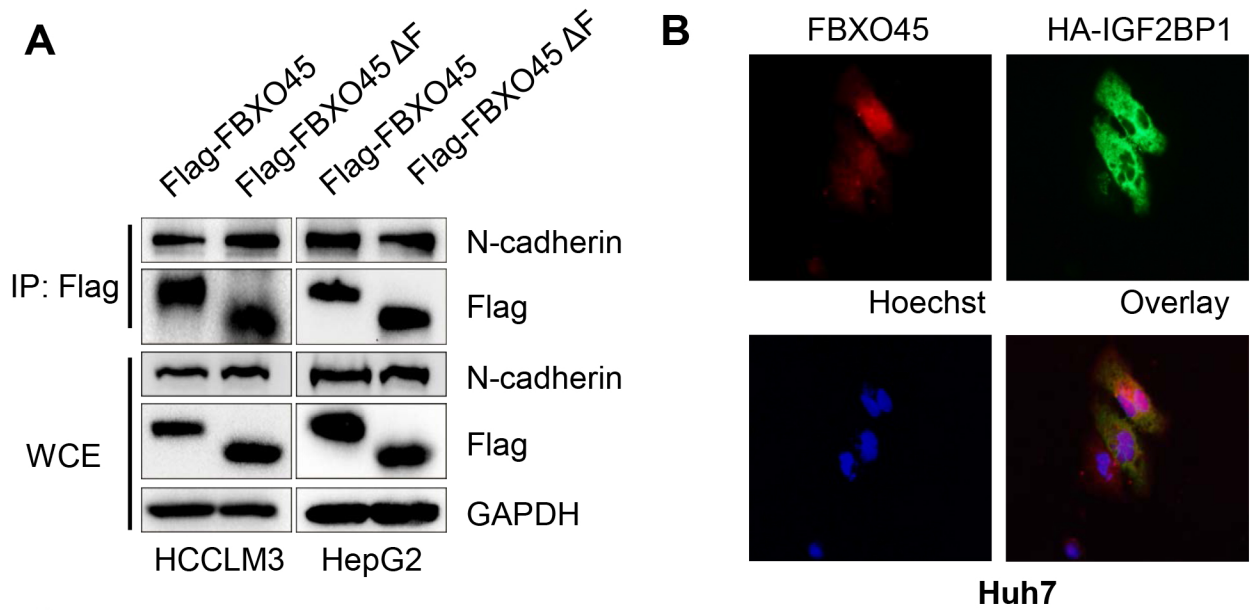

**C**

**FBXO45 binding site**

**consensus**

|                    |                   |                   |
|--------------------|-------------------|-------------------|
| IGF2BP1(Human)     | 185-GAPAKQQQV-195 | 445-TPDSKVRMV-455 |
| IGF2BP1(Yak)       | 185-GAPAKQQQV-195 | 444-TPDSKVRMV-454 |
| IGF2BP1(Orangutan) | 185-GAPAKQQQV-195 | 444-TPDSKVRMV-454 |
| IGF2BP1(Rat)       | 185-GAPAKQQQV-195 | 445-TPDSKVRMV-455 |
| IGF2BP1(Mus)       | 185-GAPAKQQQV-195 | 445-TPDSKVRMV-455 |
| IGF2BP1(Hamster)   | 185-GAPAKQQQV-195 | 468-TPDSKVRMV-478 |
| IGF2BP1(Chicken)   | 185-GAPVKQQPV-195 | 443-TPDSKVMVV-453 |
| IGF2BP1(Zebrafish) | 187-GIPSKHQHA-197 | 446-APDSKMRMV-456 |

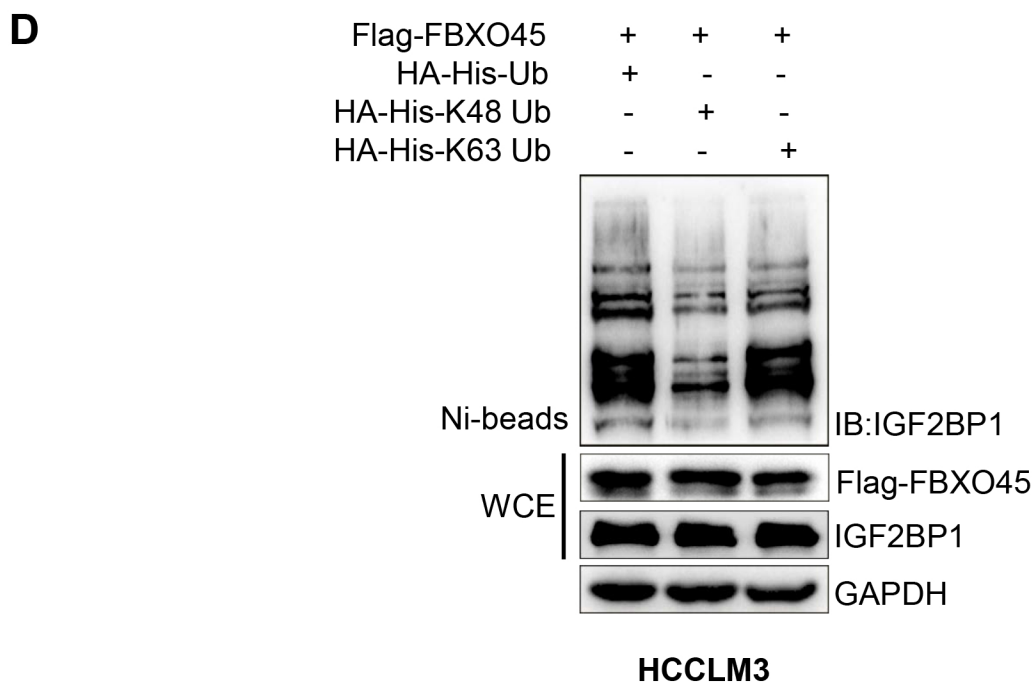

Supplement: supp [file elife-70715-supp-v1.zip › elife_poa_e70715_Figure_3_figure_supplement_1.pdf]
