# Supplementary material for: Elevated FBXO45 promotes liver tumorigenesis through enhancing IGF2BP1 ubiquitination and subsequent PLK1 upregulation
Source: eLife journal article supplement (doi:10.7554/elife.70715), 2021-11-15
Supplement: supp [file elife-70715-supp-v1.zip › elife_poa_e70715_Figure_3_source_data_1.xls]

## Sheet: Tumor vs Normal tissue
Protein accession	Position	Tumor/Normal tissue Ratio	Regulated Type	Amino acid	Protein description	Gene name	Localization probability	PEP	Score	Modified sequence	Charge	Mass error [ppm]	MS/MS Count	Tumor	Normal tissue
Q5ZPR3	526	1.633	Up	K	CD276 antigen	CD276	1	8.63437e-06	138.45	HSDSK(1)EDDGQEIA	3	-0.2578	4	1.241	0.759
P09651	8	1.671	Up	K	Heterogeneous nuclear ribonucleoprotein A1	HNRNPA1	1	0.000115573	119.34	SESPK(1)EPEQLR	2	0.35486	4	1.251	0.749
P09651	166	1.507	Up	K	Heterogeneous nuclear ribonucleoprotein A1	HNRNPA1	1	0.000143357	91.657	IVIQK(1)YHTVNGHNCEVR	4	-0.62284	2	1.202	0.798
P09651	105	2.116	Up	K	Heterogeneous nuclear ribonucleoprotein A1	HNRNPA1	1	1.13977e-08	155.17	EDSQRPGAHLTVK(1)K	4	2.2783	4	1.358	0.642
P80723	143	1.673	Up	K	Brain acid soluble protein 1	BASP1	1	4.12707e-12	105.04	AAEAAAAPAESAAPAAGEEPSK(1)EEGEPK	3	-0.11329	2	1.252	0.748
P80723	18	4.111	Up	K	Brain acid soluble protein 1	BASP1	1	6.20744e-05	133.23	GYNVNDEK(1)AK	3	0.51068	4	1.609	0.391
P80723	84	2.259	Up	K	Brain acid soluble protein 1	BASP1	0.999999	2.19567e-07	125.73	EEAPK(1)AEPEKTEGAAEAK	3	0.23323	1	1.386	0.614
P80723	184	1.728	Up	K	Brain acid soluble protein 1	BASP1	0.997448	4.97669e-07	73.758	SDGAPASDSK(0.003)PGSSEAAPSSK(0.997)ETPAATEAPSSTPK	4	-0.36955	2	1.267	0.733
P06899	6	1.777	Up	K	Histone H2B type 1-J	HIST1H2BJ	1	3.01744e-05	136.27	PEPAK(1)SAPAPK	2	-0.7156	4	1.28	0.72
P06899	121	1.97	Up	K	Histone H2B type 1-J	HIST1H2BJ	1	0.00718927	81.972	AVTK(1)YTSAK	3	-0.74239	10	1.327	0.673
P05388	26	1.532	Up	K	60S acidic ribosomal protein P0	RPLP0	1	2.46271e-06	87.319	IIQLLDDYPK(1)CFIVGADNVGSK	3	-0.24643	4	1.21	0.79
P05388	162	2.362	Up	K	60S acidic ribosomal protein P0	RPLP0	1	4.8696e-07	135.55	GTIEILSDVQLIK(1)TGDK	3	0.24999	2	1.405	0.595
P07741	34	1.899	Up	K	Adenine phosphoribosyltransferase	APRT	1	5.09947e-06	141.73	DISPVLK(1)DPASFR	2	0.15939	4	1.31	0.69
P45973	102	1.852	Up	K	Chromobox protein homolog 5	CBX5	1	1.01328e-05	132.59	SNFSNSADDIK(1)SK	3	-0.59355	2	1.299	0.701
P63218	36	2.36	Up	K	Guanine nucleotide-binding protein G(I)/G(S)/G(O) subunit gamma-5	GNG5	1	5.0238e-18	107.59	VSQAAADLK(1)QFCLQNAQHDPLLTGVSSSTNPFRPQK	4	-0.11802	4	1.405	0.595
O75808	293	1.568	Up	K	Calpain-15	CAPN15	1	0.00549206	76.605	LAELLSGK(1)R	3	-0.56243	1	1.221	0.779
Q13765	142	1.533	Up	K	Nascent polypeptide-associated complex subunit alpha	NACA	1	3.2094e-05	107.98	IEDLSQQAQLAAAEK(1)FK	3	-1.1736	2	1.21	0.79
Q9Y6I9	73	1.972	Up	K	Testis-expressed protein 264	TEX264	1	0.000691604	94.122	LFTESCSISPK(1)LR	3	1.1423	1	1.327	0.673
O14974	294	1.653	Up	K	Protein phosphatase 1 regulatory subunit 12A	PPP1R12A	1	0.00770236	67.334	K(1)QNLLHSEK(1)R	2	0.56018	1	1.246	0.754
O14974	286	1.653	Up	K	Protein phosphatase 1 regulatory subunit 12A	PPP1R12A	1	0.00770236	67.334	K(1)QNLLHSEK(1)R	2	0.56018	1	1.246	0.754
P22626	104	2.228	Up	K	Heterogeneous nuclear ribonucleoproteins A2/B1	HNRNPA2B1	1	5.54127e-09	166.03	EESGK(1)PGAHVTVK	4	-0.30937	5	1.38	0.62
P22626	120	1.574	Up	K	Heterogeneous nuclear ribonucleoproteins A2/B1	HNRNPA2B1	1	9.20633e-10	162.37	LFVGGIK(1)EDTEEHHLR	4	0.44453	8	1.223	0.777
P22626	22	1.635	Up	K	Heterogeneous nuclear ribonucleoproteins A2/B1	HNRNPA2B1	1	3.74806e-10	157.91	K(1)LFIGGLSFETTEESLR	2	-1.7271	3	1.241	0.759
P22626	113	1.696	Up	K	Heterogeneous nuclear ribonucleoproteins A2/B1	HNRNPA2B1	0.999144	0.00226985	60.093	K(0.999)LFVGGIK(0.001)EDTEEHHLR	4	0.61745	2	1.258	0.742
P50402	79	1.744	Up	K	Emerin	EMD	1	2.39282e-11	187.85	K(1)EDALLYQSK	2	-1.1104	4	1.271	0.729
Q15365	115	3.4	Up	K	Poly(rC)-binding protein 1	PCBP1	1	1.45389e-07	125.98	LVVPATQCGSLIGK(1)GGCK	3	1.6882	2	1.545	0.455
O60716	517	1.725	Up	K	Catenin delta-1	CTNND1	1	0.0121886	68.016	EPNEDCK(1)PR	2	-0.35705	1	1.266	0.734
P53582	278	1.701	Up	K	Methionine aminopeptidase 1	METAP1	1	2.23968e-05	94.281	ELGNIIQK(1)HAQANGFSVVR	4	-0.046805	3	1.259	0.741
Q96J84	729	1.621	Up	K	Kin of IRRE-like protein 1	KIRREL1	1	3.28878e-07	139.08	TPYEAYDPIGK(1)YATATR	3	-0.14151	2	1.237	0.763
P35241	162	2.555	Up	K	Radixin	RDX	1	3.99425e-08	174.98	VLEQHK(1)LTK	2	2.5863	4	1.437	0.563
P35241	526	2.477	Up	K	Radixin	RDX	1	9.69633e-14	186.51	K(1)QLQALSSELAQAR	2	1.4283	5	1.425	0.575
Q9Y3P4	374	1.607	Up	K	Rhomboid domain-containing protein 3	RHBDD3	1	1.29791e-27	158.13	VEGAVSLLVGGQVGTETLVTHGK(1)GGPAHSEGPGPP	3	0.34419	6	1.233	0.767
O95297	213	1.952	Up	K	Myelin protein zero-like protein 1	MPZL1	1	1.77265e-08	142.39	DYTGCSTSESLSPVK(1)QAPR	3	0.26344	2	1.322	0.678
Q9C0H2	508	1.653	Up	K	Protein tweety homolog 3	TTYH3	1	0.000140987	94.128	AK(1)YLATSQPRPDSSGSH	4	-1.0466	3	1.246	0.754
P62258	106	1.681	Up	K	14-3-3 protein epsilon	YWHAE	1	1.06787e-11	136.64	LICCDILDVLDK(1)HLIPAANTGESK	4	-0.28298	4	1.254	0.746
P62258	29	1.628	Up	K	14-3-3 protein epsilon	YWHAE	1	0.000819541	92.939	K(1)VAGMDVELTVEER	3	1.2491	2	1.239	0.761
O00148	35	2.338	Up	K	ATP-dependent RNA helicase DDX39A	DDX39A	1	0.0026099	69.331	DIK(1)GSYVSIHSSGFR	4	-0.76191	3	1.401	0.599
Q5VST6	206	2.047	Up	K	Alpha/beta hydrolase domain-containing protein 17B	ABHD17B	1	0.00956767	80.438	VAFPDTK(1)K	2	1.2293	2	1.344	0.656
P61247	249	1.91	Up	K	40S ribosomal protein S3a	RPS3A	1	0.00652764	62.088	ATGDETGAK(1)VER	3	-0.0047139	1	1.313	0.687
P16615	611	1.514	Up	K	Sarcoplasmic/endoplasmic reticulum calcium ATPase 2	ATP2A2	1	0.000220621	112.85	IEVASSVK(1)LCR	3	0.034971	2	1.204	0.796
Q8TBC4	361	1.589	Up	K	NEDD8-activating enzyme E1 catalytic subunit	UBA3	1	9.94098e-11	129.02	K(1)ENCPACSQLPQNIQFSPSAK	3	-0.53811	2	1.228	0.772
P53985	462	1.503	Up	K	Monocarboxylate transporter 1	SLC16A1	1	1.18343e-11	154.34	ESK(1)EEETSIDVAGKPNEVTK	3	0.10146	7	1.201	0.799
Q9NXW2	166	2.246	Up	K	DnaJ homolog subfamily B member 12	DNAJB12	1	0.00132738	77.372	AIGTAYAVLSNPEK(1)R	3	1.5349	2	1.384	0.616
P51149	38	1.757	Up	K	Ras-related protein Rab-7a	RAB7A	1	0.00140208	72.642	FSNQYK(1)ATIGADFLTK	3	0.02966	2	1.275	0.725
Q7L5N1	102	1.723	Up	K	COP9 signalosome complex subunit 6	COPS6	1	0.000314813	107.03	IIIDK(1)EYYYTK	3	-0.24462	2	1.265	0.735
Q14764	674	1.503	Up	K	Major vault protein	MVP	1	3.97508e-11	129.43	SVQLAIEITTNSQEAAAK(1)HEAQR	4	-0.46938	1	1.201	0.799
P06493	243	1.79	Up	K	Cyclin-dependent kinase 1	CDK1	0.963383	6.78451e-05	114.63	NTFPK(0.963)WK(0.037)PGSLASHVK	4	0.41984	2	1.283	0.717
P06493	24	2.244	Up	K	Cyclin-dependent kinase 1	CDK1	1	0.000609452	97.439	HK(1)TTGQVVAMK	3	-0.80369	2	1.383	0.617
P55036	365	1.695	Up	K	26S proteasome non-ATPase regulatory subunit 4	PSMD4	0.97981	0.000106253	114.31	NAMGSLASQATK(0.98)DGK(0.02)K	3	0.33841	1	1.258	0.742
Q9BZX2	78	1.525	Up	K	Uridine-cytidine kinase 2	UCK2	1	1.93158e-08	103.73	ALK(1)GQFNFDHPDAFDNELILK	4	0.12264	3	1.208	0.792
Q8IVM0	152	1.96	Up	K	Coiled-coil domain-containing protein 50	CCDC50	1	0.00116061	74.296	AYADSYYYEDGGMK(1)PR	3	0.20207	2	1.324	0.676
Q8IVM0	157	8.8	Up	K	Coiled-coil domain-containing protein 50	CCDC50	1	0.0268973	46.88	VMK(1)EAVSTPSR	3	1.2877	1	1.796	0.204
P84103	23	1.555	Up	K	Serine/arginine-rich splicing factor 3	SRSF3	1	1.98201e-10	162.29	VYVGNLGNNGNK(1)TELER	3	0.72887	3	1.217	0.783
P62979	104	1.773	Up	K	Ubiquitin-40S ribosomal protein S27a	RPS27A	1	0.0161268	60.972	LAVLK(1)YYK	3	-0.82123	2	1.279	0.721
P62979	63	1.751	Up	K	Ubiquitin-40S ribosomal protein S27a	RPS27A	1	2.95948e-32	224.67	TLSDYNIQK(1)ESTLHLVLR	3	4.3538	74	1.273	0.727
P62979	29	1.747	Up	K	Ubiquitin-40S ribosomal protein S27a	RPS27A	1	5.30197e-38	237.59	AK(1)IQDK(1)EGIPPDQQR	4	-0.34214	51	1.272	0.728
O60220	88	1.736	Up	K	Mitochondrial import inner membrane translocase subunit Tim8 A	TIMM8A	1	0.000277429	114.86	SK(1)PVFSESLSD	2	-0.69522	2	1.269	0.731
P27694	410	2.377	Up	K	Replication protein A 70 kDa DNA-binding subunit	RPA1	1	9.39983e-09	102.67	SLSVLSSSTIIANPDIPEAYK(1)LR	3	0.066428	2	1.408	0.592
P05455	165	2.124	Up	K	Lupus La protein	SSB	1	0.000926389	84.759	GSIFVVFDSIESAK(1)K	3	1.0214	1	1.36	0.64
Q02750	192	1.718	Up	K	Dual specificity mitogen-activated protein kinase kinase 1	MAP2K1	1	3.03565e-06	143.31	DVK(1)PSNILVNSR	3	1.174	2	1.264	0.736
P08195	171	1.779	Up	K	4F2 cell-surface antigen heavy chain	SLC3A2	1	8.37934e-09	153.81	EELLK(1)VAGSPGWVR	3	0.29095	6	1.28	0.72
Q9BXW9	561	1.584	Up	K	Fanconi anemia group D2 protein	FANCD2	1	4.8379e-06	163.66	K(1)QLSSTVFK	3	0.16986	10	1.226	0.774
Q9UMX0	70	1.785	Up	K	Ubiquilin-1	UBQLN1	1	6.02366e-06	128.71	FK(1)SHTDQLVLIFAGK	3	1.1157	2	1.282	0.718
Q9UMX0	45	1.98	Up	K	Ubiquilin-1	UBQLN1	0.91726	1.61608e-15	126.96	TPK(0.917)EK(0.083)EEFAVPENSSVQQFKEEISK	4	0.90629	3	1.329	0.671
Q00535	213	1.982	Up	K	Cyclin-dependent-like kinase 5	CDK5	1	3.3494e-06	140.82	PLFPGNDVDDQLK(1)R	3	0.071171	1	1.329	0.671
P39023	366	1.946	Up	K	60S ribosomal protein L3	RPL3	1	0.000965161	91.123	IDLK(1)FIDTTSK	3	0.15701	2	1.321	0.679
P39023	115	1.934	Up	K	60S ribosomal protein L3	RPL3	1	0.00592439	64.224	TVFAEHISDECK(1)R	4	0.067633	1	1.318	0.682
Q6PJT7	489	2.023	Up	K	Zinc finger CCCH domain-containing protein 14	ZC3H14	1	6.40839e-15	154.75	LSEEVVVAPNQESGMK(1)TADSLR	3	-0.15365	2	1.338	0.662
Q16850	436	1.554	Up	K	Lanosterol 14-alpha demethylase	CYP51A1	1	4.69416e-06	81.807	YLQDNPASGEK(1)FAYVPFGAGR	3	0.099637	2	1.217	0.783
P63151	129	1.818	Up	K	Serine/threonine-protein phosphatase 2A 55 kDa regulatory subunit B alpha isoform	PPP2R2A	1	0.00124924	78.69	DK(1)RPEGYNLK(1)EEDGR	4	1.8215	4	1.29	0.71
P28074	91	1.584	Up	K	Proteasome subunit beta type-5	PSMB5	1	2.55001e-27	225.79	ATAGAYIASQTVK(1)K	3	-0.57915	3	1.226	0.774
O94979	1217	1.648	Up	K	Protein transport protein Sec31A	SEC31A	1	0.00243785	78.932	VVLTQANK(1)LGV	2	-0.14818	1	1.245	0.755
P12956	468	1.546	Up	K	X-ray repair cross-complementing protein 6	XRCC6	1	0.00692515	110.63	AIVEK(1)LR	2	0.11603	2	1.214	0.786
P12956	565	2.042	Up	K	X-ray repair cross-complementing protein 6	XRCC6	1	3.6898e-06	139.3	VEYSEEELK(1)THISK	3	0.41771	2	1.342	0.658
P12956	238	1.511	Up	K	X-ray repair cross-complementing protein 6	XRCC6	1	0.000914082	87.863	VHFEESSK(1)LEDLLR	3	0.079029	2	1.204	0.796
P12956	123	3.121	Up	K	X-ray repair cross-complementing protein 6	XRCC6	1	6.33831e-05	120.55	ILELDQFK(1)GQQGQK	3	0.37653	2	1.515	0.485
P12956	114	1.885	Up	K	X-ray repair cross-complementing protein 6	XRCC6	1	6.53224e-29	224.42	NIYVLQELDNPGAK(1)R	2	-0.11661	3	1.307	0.693
P12956	317	1.636	Up	K	X-ray repair cross-complementing protein 6	XRCC6	1	2.6008e-21	195.89	TFNTSTGGLLLPSDTK(1)R	2	0.021909	4	1.241	0.759
P12956	31	1.585	Up	K	X-ray repair cross-complementing protein 6	XRCC6	1	4.93336e-20	154.13	TEGDEEAEEEQEENLEASGDYK(1)YSGR	3	0.71577	2	1.226	0.774
Q16719	163	1.543	Up	K	Kynureninase	KYNU	1	4.05378e-10	90.388	ILLEAK(1)AFPSDHYAIESQLQLHGLNIEESMR	4	1.1106	1	1.214	0.786
Q15038	153	1.669	Up	K	DAZ-associated protein 2	DAZAP2	1	0.00287235	67.136	K(1)GNFFMGGSDGGYTIW	2	1.9349	1	1.251	0.749
O43175	384	1.692	Up	K	D-3-phosphoglycerate dehydrogenase	PHGDH	1	0.0013623	86.729	EASK(1)QADVNLVNAK	3	-0.16269	2	1.257	0.743
O43175	33	1.708	Up	K	D-3-phosphoglycerate dehydrogenase	PHGDH	1	0.00190212	69.081	ILQDGGLQVVEK(1)QNLSK	3	-0.24872	1	1.262	0.738
O43175	289	1.631	Up	K	D-3-phosphoglycerate dehydrogenase	PHGDH	1	3.71729e-09	106.12	ALVDHENVISCPHLGASTK(1)EAQSR	5	0.36995	2	1.24	0.76
O43175	69	2.802	Up	K	D-3-phosphoglycerate dehydrogenase	PHGDH	1	6.22665e-10	147.56	VTADVINAAEK(1)LQVVGR	3	-0.67312	2	1.474	0.526
P60174	51	1.786	Up	K	Triosephosphate isomerase	TPI1	1	0.00299888	77.288	FFVGGNWK(1)MNGR	3	0.55357	1	1.282	0.718
O75367	123	2.168	Up	K	Core histone macro-H2A.1	H2AFY	1	4.74769e-09	166.48	GK(1)LEAIITPPPAK	2	-0.14905	23	1.369	0.631
Q9Y5Y0	549	1.767	Up	K	Feline leukemia virus subgroup C receptor-related protein 1	FLVCR1	1	0.00455019	86.911	TVMLSK(1)QSESAI	2	-0.56499	3	1.277	0.723
Q96IV0	419	1.778	Up	K	Peptide-N(4)-(N-acetyl-beta-glucosaminyl)asparagine amidase	NGLY1	1	0.00281722	76.1	DTINGLNK(1)QR	3	0.91612	2	1.28	0.72
O75190	60	1.581	Up	K	DnaJ homolog subfamily B member 6	DNAJB6	1	2.83276e-08	159.52	QVAEAYEVLSDAK(1)K	2	3.821	3	1.225	0.775
Q96BY9	326	1.967	Up	K	Store-operated calcium entry-associated regulatory factor	SARAF	1	0.000286375	61.345	AYSPLHGGSGSYSVCSNSDTK(1)TR	4	-0.8551	2	1.326	0.674
P31943	35	1.591	Up	K	Heterogeneous nuclear ribonucleoprotein H	HNRNPH1	1	0.000124307	118.73	FFSDCK(1)IQNGAQGIR	3	-1.2844	4	1.228	0.772
P31943	185	1.591	Up	K	Heterogeneous nuclear ribonucleoprotein H	HNRNPH1	1	0.00389699	79.986	YIEIFK(1)SSR	3	-0.52464	2	1.228	0.772
P63162	88	1.78	Up	K	Small nuclear ribonucleoprotein-associated protein N	SNRPN	1	3.73302e-06	85.737	GENLVSMTVEGPPPK(1)DTGIAR	3	1.6255	1	1.28	0.72
P16401	37	1.943	Up	K	Histone H1.5	HIST1H1B	1	4.63358e-06	141.59	K(1)ATGPPVSELITK	2	-0.15694	3	1.32	0.68
P46934	864	1.548	Up	K	E3 ubiquitin-protein ligase NEDD4	NEDD4	1	3.02706e-05	109.07	PFFIDHNTK(1)TTTWEDPR	4	0.80167	2	1.215	0.785
Q9BXF6	586	1.683	Up	K	Rab11 family-interacting protein 5	RAB11FIP5	1	1.25526e-05	137.62	LK(1)DSAVLDQSAK	2	0.063263	4	1.254	0.746
Q8NBN3	512	1.536	Up	K	Transmembrane protein 87A	TMEM87A	1	0.0273346	42.802	VNK(1)AQEDDLK	3	-0.71628	1	1.211	0.789
Q04837	122	1.85	Up	K	Single-stranded DNA-binding protein, mitochondrial	SSBP1	1	0.041553	45.28	IDYGEYMDK(1)NNVR	3	-1.2256	2	1.298	0.702
P31641	6	2.265	Up	K	Sodium- and chloride-dependent taurine transporter	SLC6A6	1	0.00960157	99.799	EK(1)LQCLK	2	-0.33182	2	1.387	0.613
P31641	24	1.573	Up	K	Sodium- and chloride-dependent taurine transporter	SLC6A6	0.999975	4.15665e-12	115.87	DILKPSPGK(1)SPGTRPEDEAEGKPPQR	4	0.70819	3	1.223	0.777
Q92890	178	1.892	Up	K	Ubiquitin recognition factor in ER-associated degradation protein 1	UFD1	0.933753	9.52182e-15	101.85	VMETK(0.066)PDK(0.934)AVSIIECDMNVDFDAPLGYKEPER	4	-1.1513	2	1.308	0.692
P17980	276	1.653	Up	K	26S proteasome regulatory subunit 6A	PSMC3	1	0.00326718	93.667	DAFALAK(1)EK	3	0.42183	3	1.246	0.754
P17980	211	1.831	Up	K	26S proteasome regulatory subunit 6A	PSMC3	1	0.00056461	97.779	EK(1)FENLGIQPPK	3	0.72305	1	1.293	0.707
P05783	118	4.332	Up	K	Keratin, type I cytoskeletal 18	KRT18	1	0.0110853	64.485	IREHLEK(1)K	3	0.3797	2	1.625	0.375
P05783	417	2.08	Up	K	Keratin, type I cytoskeletal 18	KRT18	1	2.43982e-13	181.26	RIVDGK(1)VVSETNDTK	3	0.31466	6	1.351	0.649
P05783	81	2.095	Up	K	Keratin, type I cytoskeletal 18	KRT18	1	8.22303e-52	225.57	GGMGSGGLATGIAGGLAGMGGIQNEK(1)ETMQSLNDR	4	-0.37559	13	1.354	0.646
P55072	18	2.218	Up	K	Transitional endoplasmic reticulum ATPase	VCP	1	1.05618e-11	168.71	GDDLSTAILK(1)QK	2	0.36967	6	1.378	0.622
P55072	486	1.603	Up	K	Transitional endoplasmic reticulum ATPase	VCP	1	9.70271e-09	111.66	ETVVEVPQVTWEDIGGLEDVK(1)R	3	0.045831	2	1.232	0.768
P55072	668	1.548	Up	K	Transitional endoplasmic reticulum ATPase	VCP	0.999992	3.62581e-08	152.37	KSPVAK(1)DVDLEFLAK	2	-0.2769	6	1.215	0.785
P33527	814	1.907	Up	K	Multidrug resistance-associated protein 1	ABCC1	1	0.00321057	69.345	HIFENVIGPK(1)GMLK	3	-0.03734	2	1.312	0.688
P33527	280	1.526	Up	K	Multidrug resistance-associated protein 1	ABCC1	1	0.0339632	40.377	VVYSSK(1)DPAQPK	3	-1.5992	1	1.208	0.792
P33527	496	1.641	Up	K	Multidrug resistance-associated protein 1	ABCC1	1	0.000416173	128.08	TYQVAHMK(1)SK	2	-0.0032089	4	1.243	0.757
Q13435	492	2.452	Up	K	Splicing factor 3B subunit 2	SF3B2	1	0.0311606	41.704	LLVHLK(1)ATR	3	-0.78007	1	1.421	0.579
P62136	98	2.011	Up	K	Serine/threonine-protein phosphatase PP1-alpha catalytic subunit	PPP1CA	1	0.000715751	87.519	GK(1)QSLETICLLLAYK	3	-0.25465	1	1.336	0.664
P62136	113	2.045	Up	K	Serine/threonine-protein phosphatase PP1-alpha catalytic subunit	PPP1CA	1	0.0123324	65.241	IK(1)YPENFFLLR	3	-0.52187	2	1.343	0.657
Q9BTT0	99	2.231	Up	K	Acidic leucine-rich nuclear phosphoprotein 32 family member E	ANP32E	1	4.64279e-09	150.26	CPNLTYLNLSGNK(1)IK	3	-0.42142	1	1.381	0.619
Q9BTT0	113	3.148	Up	K	Acidic leucine-rich nuclear phosphoprotein 32 family member E	ANP32E	1	2.29238e-17	196.11	IKDLSTVEALQNLK(1)NLK	3	0.13049	6	1.518	0.482
Q9BXS4	287	1.714	Up	K	Transmembrane protein 59	TMEM59	1	1.92335e-15	187.37	LSIYGDLEFMNEQK(1)LNRYPASSLVVVR	4	0.75306	3	1.263	0.737
Q8WVC0	415	1.683	Up	K	RNA polymerase-associated protein LEO1	LEO1	1	0.00266275	103.83	LK(1)VENTIR	3	-1.3653	2	1.255	0.745
P60903	47	1.563	Up	K	Protein S100-A10	S100A10	1	9.70526e-05	93.768	EFPGFLENQK(1)DPLAVDK	2	0.046749	3	1.22	0.78
P55795	35	1.65	Up	K	Heterogeneous nuclear ribonucleoprotein H2	HNRNPH2	1	3.69811e-14	189.1	FFSDCK(1)IQNGTSGIR	2	0.69625	6	1.245	0.755
P51114	119	1.552	Up	K	Fragile X mental retardation syndrome-related protein 1	FXR1	1	0.0119469	60.305	LRPVNQNK(1)TVK	3	0.11924	1	1.216	0.784
P51114	246	1.752	Up	K	Fragile X mental retardation syndrome-related protein 1	FXR1	1	4.12658e-06	117.3	K(1)VPGVTAIELDEDTGTFR	3	-0.063329	2	1.273	0.727
P51114	310	1.964	Up	K	Fragile X mental retardation syndrome-related protein 1	FXR1	1	0.000169339	114.79	VIQEIVDK(1)SGVVR	3	-0.26598	2	1.325	0.675
P51114	325	1.598	Up	K	Fragile X mental retardation syndrome-related protein 1	FXR1	1	0.000160718	116.55	IEGDNENK(1)LPR	3	-0.21676	3	1.23	0.77
Q96FW1	84	1.736	Up	K	Ubiquitin thioesterase OTUB1	OTUB1	1	8.37681e-05	123.01	K(1)TRPDGNCFYR	3	-0.20627	2	1.269	0.731
P18124	127	1.64	Up	K	60S ribosomal protein L7	RPL7	1	0.000386891	101.54	LNK(1)ASINMLR	3	2.1616	3	1.242	0.758
P18077	95	1.635	Up	K	60S ribosomal protein L35a	RPL35A	1	0.000466728	99.973	SNLPAK(1)AIGHR	3	0.093994	2	1.241	0.759
P36578	283	1.558	Up	K	60S ribosomal protein L4	RPL4	1	0.000138439	88.19	SNYNLPMHK(1)MINTDLSR	4	-0.18201	3	1.218	0.782
P36578	14	2.513	Up	K	60S ribosomal protein L4	RPL4	1	8.52843e-07	143.93	PLISVYSEK(1)GESSGK	3	-0.14483	1	1.431	0.569
P36578	327	1.934	Up	K	60S ribosomal protein L4	RPL4	1	0.00021502	113.62	IMLK(1)LNPYAK	3	0.1749	2	1.318	0.682
P36578	320	1.797	Up	K	60S ribosomal protein L4	RPL4	0.999989	0.00390721	104.37	KNPLK(1)NLR	3	0.22707	2	1.285	0.715
P36578	140	2.404	Up	K	60S ribosomal protein L4	RPL4	1	3.67609e-09	118.54	YAICSALAASALPALVMSK(1)GHR	3	0.4851	3	1.412	0.588
P36578	364	1.899	Up	K	60S ribosomal protein L4	RPL4	1	8.00743e-06	130.47	AAAAAAALQAK(1)SDEK	3	0.81544	3	1.31	0.69
Q9Y6M5	501	1.857	Up	K	Zinc transporter 1	SLC30A1	1	0.000800169	98.634	NMPNK(1)QPESSL	2	-0.65336	2	1.3	0.7
Q8IXJ9	351	1.728	Up	K	Putative Polycomb group protein ASXL1	ASXL1	1	1.42837e-09	204.79	VEQWK(1)EK	2	-0.07957	5	1.267	0.733
P63241	85	2.821	Up	K	Eukaryotic translation initiation factor 5A-1	EIF5A	1	3.1485e-05	89.557	KYEDICPSTHNMDVPNIK(1)R	4	-0.61113	2	1.477	0.523
P63241	68	4.477	Up	K	Eukaryotic translation initiation factor 5A-1	EIF5A	1	1.09453e-05	106.28	K(1)YEDICPSTHNMDVPNIK	3	0.082092	3	1.635	0.365
Q92879	70	2.101	Up	K	CUGBP Elav-like family member 1	CELF1	1	4.1526e-06	139.48	K(1)AALEAQNALHNMK	3	0.65503	2	1.355	0.645
Q92879	101	1.829	Up	K	CUGBP Elav-like family member 1	CELF1	1	0.0212008	58.116	PADSEK(1)NNAVEDR	3	-0.8553	1	1.293	0.707
P61586	135	1.92	Up	K	Transforming protein RhoA	RHOA	1	9.99716e-19	213.18	MK(1)QEPVKPEEGR	2	1.8386	12	1.315	0.685
P22392	124	1.77	Up	K	Nucleoside diphosphate kinase B	NME2	1	6.44837e-09	157.35	NIIHGSDSVK(1)SAEK	3	0.2946	3	1.278	0.722
Q9UNN5	221	1.654	Up	K	FAS-associated factor 1	FAF1	1	1.04796e-07	144.41	EYNLNFSGSSTIQEVK(1)R	3	-0.43153	2	1.246	0.754
Q9NZI8	190	1.7	Up	K	Insulin-like growth factor 2 mRNA-binding protein 1	IGF2BP1	1	8.7877e-11	128.66	QGSPVAAGAPAK(1)QQQVDIPLR	3	0.39107	1	1.259	0.741
Q9NZI8	450	1.614	Up	K	Insulin-like growth factor 2 mRNA-binding protein 1	IGF2BP1	1	0.000954384	88.803	IAPPETPDSK(1)VR	3	-0.47665	2	1.235	0.765
Q5T9L3	419	2.465	Up	K	Protein wntless homolog	WLS	1	0.00865274	58.476	QSSLPAMSK(1)VR	3	-0.12517	1	1.423	0.577
Q71DI3	123	1.768	Up	K	Histone H3.2	HIST2H3A	1	0.00106556	86.243	VTIMPK(1)DIQLAR	3	-1.4596	2	1.278	0.722
P32320	51	2.352	Up	K	Cytidine deaminase	CDA	1	1.39163e-12	166.57	IFK(1)GCNIENACYPLGICAER	3	0.46095	2	1.403	0.597
Q9ULX3	315	1.625	Up	K	RNA-binding protein NOB1	NOB1	1	0.0557354	40.352	NPK(1)VLNPR	2	0.39565	1	1.238	0.762
Q15836	66	1.762	Up	K	Vesicle-associated membrane protein 3	VAMP3	1	1.05207e-16	179.1	ADALQAGASQFETSAAK(1)LK	3	0.31083	2	1.276	0.724
Q9BPX3	522	1.873	Up	K	Condensin complex subunit 3	NCAPG	1	0.00197416	100.79	ASELK(1)EEIK	2	0.02225	1	1.304	0.696
P68104	146	2.807	Up	K	Elongation factor 1-alpha 1	EEF1A1	1	6.30924e-17	173.51	EHALLAYTLGVK(1)QLIVGVNK	4	-0.073235	3	1.475	0.525
P68104	41	1.895	Up	K	Elongation factor 1-alpha 1	EEF1A1	1	0.0173242	87.181	TIEK(1)FEK	2	1.061	2	1.309	0.691
P68104	392	1.727	Up	K	Elongation factor 1-alpha 1	EEF1A1	1	0.000112817	138.76	KLEDGPK(1)FLK	2	-0.50967	4	1.267	0.733
P68104	179	2.373	Up	K	Elongation factor 1-alpha 1	EEF1A1	1	0.00932523	81.296	EVSTYIK(1)K	2	-0.016633	2	1.407	0.593
P26641	220	2.006	Up	K	Elongation factor 1-gamma	EEF1G	1	0.0169551	67.414	K(1)FAETQPK	2	-1.4157	1	1.335	0.665
P42356	1749	1.769	Up	K	Phosphatidylinositol 4-kinase alpha	PI4KA	1	0.000944217	88.075	ITNVSAIIK(1)PYPK	3	0.84797	2	1.278	0.722
P12004	164	1.591	Up	K	Proliferating cell nuclear antigen	PCNA	1	1.74763e-32	228.58	DLSHIGDAVVISCAK(1)DGVK	2	0.1617	17	1.228	0.772
P23396	197	1.612	Up	K	40S ribosomal protein S3	RPS3	1	3.17579e-05	122.46	IMLPWDPTGK(1)IGPK	3	-1.3841	4	1.234	0.766
P23396	230	1.864	Up	K	40S ribosomal protein S3	RPS3	1	0.00014693	110.35	GGK(1)PEPPAMPQPVPTA	2	-0.82894	2	1.302	0.698
P62081	169	3.151	Up	K	40S ribosomal protein S7	RPS7	1	0.00128974	65.105	AQQNNVEHK(1)VETFSGVYK	4	0.54451	1	1.518	0.482
P06454	15	3.317	Up	K	Prothymosin alpha	PTMA	1	1.67054e-15	188	SDAAVDTSSEITTK(1)DLK	2	-0.24085	2	1.537	0.463
P52294	356	1.57	Up	K	Importin subunit alpha-5	KPNA1	1	5.40583e-14	179.56	K(1)EACWTISNITAGNR	3	-1.1585	2	1.222	0.778
Q9NRX5	343	1.742	Up	K	Serine incorporator 1	SERINC1	1	5.51962e-20	152.34	TSNNSQVNK(1)LTLTSDESTLIEDGGAR	3	0.2639	2	1.271	0.729
P46379	56	1.519	Up	K	Large proline-rich protein BAG6	BAG6	1	2.23494e-06	139.86	EHIAASVSIPSEK(1)QR	3	0.65134	3	1.206	0.794
P62070	177	1.555	Up	K	Ras-related protein R-Ras2	RRAS2	1	0.000125663	115.68	K(1)FQEQECPPSPEPTR	3	0.55464	1	1.217	0.783
Q9BVL2	422	1.662	Up	K	Nucleoporin p58/p45	NUP58	1	2.6706e-09	164.93	K(1)MFLGDAVDVFETR	3	-0.90028	2	1.249	0.751
Q9UPT9	166	1.654	Up	K	Ubiquitin carboxyl-terminal hydrolase 22	USP22	1	0.00134095	87.641	K(1)ITSNCTIGLR	3	-0.65534	1	1.247	0.753
Q9P0M6	116	9.123	Up	K	Core histone macro-H2A.2	H2AFY2	1	0.00384218	84.615	IHPELLAK(1)K	3	-0.035833	3	1.802	0.198
Q96KB5	65	1.519	Up	K	Lymphokine-activated killer T-cell-originated protein kinase	PBK	1	0.00681185	66.267	K(1)INPICNDHYR	3	-0.15166	2	1.206	0.794
O75915	151	1.522	Up	K	PRA1 family protein 3	ARL6IP5	0.998186	0.00712478	65.276	NK(0.002)LENK(0.998)MEGIGLK	3	0.79707	1	1.207	0.793
Q14677	200	1.888	Up	K	Clathrin interactor 1	CLINT1	1	2.46941e-05	122.33	SAFPFSDK(1)LGELSDK	3	0.68421	2	1.307	0.693
Q14677	218	2.295	Up	K	Clathrin interactor 1	CLINT1	1	1.58892e-08	155.86	IGSTIDDTISK(1)FR	3	0.48677	1	1.393	0.607
P22102	251	1.508	Up	K	Trifunctional purine biosynthetic protein adenosine-3	GART	1	0.00578582	88.37	IK(1)DTVLQR	3	-0.50245	4	1.203	0.797
P08708	32	2.116	Up	K	40S ribosomal protein S17	RPS17	1	0.000848075	96.143	LGNDFHTNK(1)R	3	-0.69594	2	1.358	0.642
P63261	61	1.86	Up	K	Actin, cytoplasmic 2	ACTG1	1	3.33657e-26	215.08	DSYVGDEAQSK(1)R	2	-0.012636	4	1.301	0.699
P17676	316	1.512	Up	K	CCAAT/enhancer-binding protein beta	CEBPB	1	0.0398177	57.177	K(1)VEQLSR	2	0.7194	1	1.204	0.796
Q14566	517	1.791	Up	K	DNA replication licensing factor MCM6	MCM6	1	0.000197769	108.66	SLK(1)QNINLSAPIMSR	3	-0.47035	1	1.283	0.717
P67870	191	1.83	Up	K	Casein kinase II subunit beta	CSNK2B	1	1.90747e-11	141.18	LYGFK(1)IHPMAYQLQLQAASNFK	4	0.41576	1	1.293	0.707
P00558	216	1.693	Up	K	Phosphoglycerate kinase 1	PGK1	1	1.33781e-08	114.37	ALESPERPFLAILGGAK(1)VADK	4	0.0089499	3	1.257	0.743
Q96S55	286	1.981	Up	K	ATPase WRNIP1	WRNIP1	1	3.05906e-19	209.19	TTLAHIIASNSK(1)K	2	0.061827	3	1.329	0.671
Q96S55	310	2.063	Up	K	ATPase WRNIP1	WRNIP1	1	7.61172e-07	150.04	DVIK(1)QAQNEK	3	0.36108	4	1.347	0.653
Q96S55	601	1.548	Up	K	ATPase WRNIP1	WRNIP1	1	2.53615e-09	150.22	SIEVYSAYNNVK(1)ACLR	3	-0.43436	2	1.215	0.785
Q96S55	482	1.709	Up	K	ATPase WRNIP1	WRNIP1	1	1.22089e-08	150.49	VLITENDVK(1)EGLQR	2	-2.3225	4	1.262	0.738
Q96S55	633	1.521	Up	K	ATPase WRNIP1	WRNIP1	1	0.00697497	76.679	DLGYGK(1)GYK	2	0.078304	4	1.207	0.793
P61026	154	1.967	Up	K	Ras-related protein Rab-10	RAB10	1	0.000219707	111.12	FFETSAK(1)ANINIEK	3	0.84686	2	1.326	0.674
O60502	297	1.99	Up	K	Protein O-GlcNAcase	MGEA5	1	0.0476126	55.37	LFLGPYK(1)GR	3	0.18772	1	1.331	0.669
P46736	65	1.601	Up	K	Lys-63-specific deubiquitinase BRCC36	BRCC3	1	0.000385401	110.38	TVAEK(1)VDAVR	3	-0.32795	3	1.231	0.769
Q8TB61	431	1.518	Up	K	Adenosine 3'-phospho 5'-phosphosulfate transporter 1	SLC35B2	1	0.00192355	82.029	AVPVESPVQK(1)V	2	-0.70982	2	1.206	0.794
P07737	54	1.69	Up	K	Profilin-1	PFN1	1	2.20421e-16	175.33	TFVNITPAEVGVLVGK(1)DR	3	0.32921	2	1.257	0.743
P07737	126	3.286	Up	K	Profilin-1	PFN1	1	1.23787e-16	208.33	EGVHGGLINK(1)K	2	0.17631	3	1.533	0.467
P46783	138	2	Up	K	40S ribosomal protein S10	RPS10	1	1.96294e-15	156.87	SAVPPGADK(1)K(1)AEAGAGSATEFQFR	4	0.34737	17	1.333	0.667
P46783	139	1.578	Up	K	40S ribosomal protein S10	RPS10	1	1.96294e-15	176.4	SAVPPGADK(1)K(1)AEAGAGSATEFQFR	4	0.34737	16	1.224	0.776
P46783	107	2.06	Up	K	40S ribosomal protein S10	RPS10	1	1.40014e-06	157.47	PRPK(1)GLEGERPAR	3	-0.70984	8	1.346	0.654
P23527	6	2.086	Up	K	Histone H2B type 1-O	HIST1H2BO	1	0.00528686	67.999	PDPAK(1)SAPAPK	3	0.23568	1	1.352	0.648
O95562	6	1.645	Up	K	Vesicle transport protein SFT2B	SFT2D2	1	0.00053834	100.93	K(1)VLSGQDTEDR	2	0.037216	1	1.244	0.756
Q15369	43	1.898	Up	K	Elongin-C	ELOC	1	9.99245e-51	216.25	EHALTSGTIK(1)AMLSGPGQFAENETNEVNFR	4	-0.3421	2	1.31	0.69
P07910	50	2.726	Up	K	Heterogeneous nuclear ribonucleoproteins C1/C2	HNRNPC	1	0.0010559	63.488	IVGCSVHK(1)GFAFVQYVNER	3	0.21958	1	1.463	0.537
P07910	157	2.254	Up	K	Heterogeneous nuclear ribonucleoproteins C1/C2	HNRNPC	1	0.0441464	53.554	AVVPSK(1)R	2	-0.88863	5	1.385	0.615
Q96EB6	601	1.801	Up	K	NAD-dependent protein deacetylase sirtuin-1	SIRT1	1	0.00017806	61.612	NVESIAEQMENPDLK(1)NVGSSTGEK	3	1.1551	1	1.286	0.714
P62753	58	1.943	Up	K	40S ribosomal protein S6	RPS6	1	0.0124935	52.576	ISGGNDK(1)QGFPMK	3	-0.60593	2	1.32	0.68
Q9Y679	425	1.928	Up	K	Ancient ubiquitous protein 1	AUP1	1	4.60802e-06	65.875	GTQSLPTASASK(1)FPSSGPVTPQPTALTFAK	3	-0.35718	2	1.317	0.683
P52597	14	1.567	Up	K	Heterogeneous nuclear ribonucleoprotein F	HNRNPF	1	4.84109e-06	132.31	MLGPEGGEGFVVK(1)LR	2	-0.0024325	2	1.221	0.779
Q4VC31	100	1.657	Up	K	Coiled-coil domain-containing protein 58	CCDC58	1	0.000349058	105.36	NLDDLTLLK(1)QLR	3	-0.088471	2	1.247	0.753
Q13310	186	1.854	Up	K	Polyadenylate-binding protein 4	PABPC4	1	0.00327043	93.649	EAELGAK(1)AK	2	0.21959	1	1.299	0.701
Q13310	333	1.585	Up	K	Polyadenylate-binding protein 4	PABPC4	1	0.000371	76.761	SK(1)GFGFVCFSSPEEATK	3	-0.57287	1	1.226	0.774
Q8WU67	288	1.724	Up	K	Phospholipase ABHD3	ABHD3	1	0.00143303	77.644	HMFVK(1)QVDMDHVMK	4	0.31507	1	1.266	0.734
P0DMV9	3	1.619	Up	K	Heat shock 70 kDa protein 1B	HSPA1B	1	1.74056e-15	156.32	AK(1)AAAIGIDLGTTYSCVGVFQHGK	4	-1.1593	4	1.236	0.764
P08670	373	1.564	Up	K	Vimentin	VIM	1	2.75148e-06	139.3	LQDEIQNMK(1)EEMAR	3	-0.78202	3	1.22	0.78
P08670	139	1.878	Up	K	Vimentin	VIM	1	7.80554e-06	131.32	ILLAELEQLK(1)GQGK	3	0.17628	4	1.305	0.695
P08670	445	1.865	Up	K	Vimentin	VIM	1	0.000166636	117.02	TLLIK(1)TVETR	2	-0.075956	4	1.302	0.698
P08670	236	1.586	Up	K	Vimentin	VIM	1	6.77041e-23	145.01	K(1)LHEEEIQELQAQIQEQHVQIDVDVSKPDLTAALR	5	0.49685	3	1.227	0.773
P24928	1268	2.101	Up	K	DNA-directed RNA polymerase II subunit RPB1	POLR2A	1	9.16601e-12	103.75	IMNSDENK(1)MQEEEEVVDKMDDDVFLR	4	-0.63168	1	1.355	0.645
Q9H6X2	419	1.528	Up	K	Anthrax toxin receptor 1	ANTXR1	1	8.17184e-06	130.61	VK(1)MPEQEYEFPEPR	3	0.98026	2	1.209	0.791
P60900	102	1.929	Up	K	Proteasome subunit alpha type-6	PSMA6	1	0.00110112	111.61	YEAANWK(1)YK	2	-0.86741	4	1.317	0.683
O95155	558	2.223	Up	K	Ubiquitin conjugation factor E4 B	UBE4B	1	0.000789168	85.178	FGK(1)THPVCNLVASLR	3	-0.24121	1	1.38	0.62
Q96CW1	238	2.128	Up	K	AP-2 complex subunit mu	AP2M1	1	0.0012605	65.423	SGK(1)QSIAIDDCTFHQCVR	4	-0.090882	1	1.361	0.639
P52272	127	1.805	Up	K	Heterogeneous nuclear ribonucleoprotein M	HNRNPM	1	0.000534623	139.78	K(1)AAEVLNK	2	0.22865	2	1.287	0.713
P52272	239	1.781	Up	K	Heterogeneous nuclear ribonucleoprotein M	HNRNPM	1	0.000315988	120.57	ADILEDK(1)DGK(1)SR	3	1.0009	6	1.281	0.719
P52272	672	2.795	Up	K	Heterogeneous nuclear ribonucleoprotein M	HNRNPM	1	0.000226631	106.38	DK(1)FNECGHVLYADIK	3	0.071258	2	1.473	0.527
P52272	388	1.747	Up	K	Heterogeneous nuclear ribonucleoprotein M	HNRNPM	1	1.10577e-10	124.08	RGEIIAK(1)QGGGGGGGSVPGIER	4	0.23518	6	1.272	0.728
P52272	134	1.604	Up	K	Heterogeneous nuclear ribonucleoprotein M	HNRNPM	1	4.70652e-13	184.98	AAEVLNK(1)HSLSGRPLK	4	-0.017045	7	1.232	0.768
P52272	242	2.06	Up	K	Heterogeneous nuclear ribonucleoprotein M	HNRNPM	1	1.50732e-17	192.15	ADILEDK(1)DGK(1)SR	3	1.0009	8	1.347	0.653
P51809	172	1.718	Up	K	Vesicle-associated membrane protein 7	VAMP7	1	1.21411e-07	131.82	TENLVDSSVTFK(1)TTSR	3	1.8631	5	1.264	0.736
Q08J23	654	1.615	Up	K	tRNA (cytosine(34)-C(5))-methyltransferase	NSUN2	1	0.00610191	67.704	DLAK(1)GSIVLK	3	0.14252	2	1.235	0.765
Q14500	347	1.702	Up	K	ATP-sensitive inward rectifier potassium channel 12	KCNJ12	1	0.0214148	45.618	IDYSHFHK(1)TYEVPSTPR	4	0.88931	1	1.26	0.74
P06748	248	1.89	Up	K	Nucleophosmin	NPM1	1	0.00385587	75.566	GPSSVEDIK(1)AK	2	-2.0848	2	1.308	0.692
P06748	250	1.864	Up	K	Nucleophosmin	NPM1	1	0.0114856	60.102	AK(1)MQASIEK	3	-0.41931	1	1.302	0.698
P06748	263	1.834	Up	K	Nucleophosmin	NPM1	1	0.0287651	41.704	GGSLPK(1)VEAK	3	0.32978	1	1.294	0.706
P06748	54	1.562	Up	K	Nucleophosmin	NPM1	1	3.82381e-16	133.47	TVSLGAGAK(1)DELHIVEAEAMNYEGSPIK	4	0.23637	2	1.219	0.781
P61088	74	1.869	Up	K	Ubiquitin-conjugating enzyme E2 N	UBE2N	1	0.00128282	81.239	FMTK(1)IYHPNVDK	3	-0.51588	3	1.303	0.697
P54725	122	1.507	Up	K	UV excision repair protein RAD23 homolog A	RAD23A	1	5.17227e-21	130.7	EDK(1)SPSEESAPTTSPESVSGSVPSSGSSGR	3	0.55971	3	1.202	0.798
P60866	4	1.674	Up	K	40S ribosomal protein S20	RPS20	1	8.45149e-05	118.5	AFK(1)DTGK(1)TPVEPEVAIHR	3	0.35786	7	1.252	0.748
P60866	34	1.644	Up	K	40S ribosomal protein S20	RPS20	1	0.000610233	100.93	SLEK(1)VCADLIR	2	-0.70163	3	1.244	0.756
P62993	109	2.248	Up	K	Growth factor receptor-bound protein 2	GRB2	1	0.000383348	103.44	FGNDVQHFK(1)VLR	3	1.2295	2	1.384	0.616
P16070	705	1.948	Up	K	CD44 antigen	CD44	1	5.94221e-29	214.26	KPSGLNGEASK(1)SQEMVHLVNK	4	-0.35787	12	1.321	0.679
P41227	179	2.151	Up	K	N-alpha-acetyltransferase 10	NAA10	1	0.0184416	59.796	HVVLGAIENK(1)VESK	3	-2.4336	1	1.365	0.635
Q9H2H9	387	2.428	Up	K	Sodium-coupled neutral amino acid transporter 1	SLC38A1	1	0.00830515	103.91	TK(1)FNLCR	3	-0.26735	4	1.417	0.583
Q5JTH9	109	2.479	Up	K	RRP12-like protein	RRP12	1	4.49363e-15	159.06	SSGTFLSGLSDCTNVTFSK(1)VQR	3	-0.81855	2	1.425	0.575
P06733	71	2.079	Up	K	Alpha-enolase	ENO1	1	0.0278923	42.78	AVEHINK(1)TIAPALVSK	3	0.32296	2	1.351	0.649
P06733	420	1.66	Up	K	Alpha-enolase	ENO1	1	2.35083e-06	146.11	IEEELGSK(1)AK	2	0.19106	3	1.248	0.752
P06733	89	2.089	Up	K	Alpha-enolase	ENO1	1	5.69317e-08	149.02	LNVTEQEK(1)IDK	3	-0.55827	4	1.353	0.647
P11169	477	4.238	Up	K	Solute carrier family 2, facilitated glucose transporter member 3	SLC2A3	1	1.01213e-10	153.72	SGK(1)DGVMEMNSIEPAKETTTNV	3	-0.37749	8	1.618	0.382
P00338	318	1.505	Up	K	L-lactate dehydrogenase A chain	LDHA	1	0.00102853	92.445	K(1)SADTLWGIQK	3	0.096232	1	1.202	0.798
P00338	222	1.674	Up	K	L-lactate dehydrogenase A chain	LDHA	0.88967	5.39289e-06	127.18	TLHPDLGTDK(0.89)DK(0.11)EQWK	4	0.12556	3	1.252	0.748
P00338	14	1.62	Up	K	L-lactate dehydrogenase A chain	LDHA	1	3.64282e-05	105.79	DQLIYNLLK(1)EEQTPQNK	3	-0.31373	1	1.237	0.763
Q15366	309	1.663	Up	K	Poly(rC)-binding protein 2	PCBP2	1	0.00897043	66.27	QGAK(1)INEIR	3	1.4637	3	1.249	0.751
Q9Y666	976	2.065	Up	K	Solute carrier family 12 member 7	SLC12A7	1	2.45125e-14	179.97	TQAPPTPDK(1)VQMTWTR	2	0.61438	3	1.347	0.653
P07355	10	1.594	Up	K	Annexin A2	ANXA2	1	1.36059e-05	85.849	STVHEILCK(1)LSLEGDHSTPPSAYGSVK	4	0.33199	2	1.229	0.771
P43121	616	1.627	Up	K	Cell surface glycoprotein MUC18	MCAM	1	2.18039e-11	157.88	SDK(1)LPEEMGLLQGSSGDKR	3	0.10206	6	1.239	0.761
P48960	730	2.061	Up	K	CD97 antigen	CD97	1	9.33531e-05	123.79	FSEINPDMK(1)K	2	-1.5053	4	1.347	0.653
Q9UPY5	12	1.543	Up	K	Cystine/glutamate transporter	SLC7A11	1	5.94461e-08	131.67	KPVVSTISK(1)GGYLQGNVNGR	3	-1.3565	3	1.213	0.787
Q92887	728	1.52	Up	K	Canalicular multispecific organic anion transporter 1	ABCC2	1	1.07008e-12	171.73	DNILFGTEFNEK(1)R	2	-0.98843	3	1.206	0.794
Q14118	793	1.656	Up	K	Dystroglycan	DAG1	1	2.12631e-08	159.44	LTLEDQATFIK(1)K	3	0.25055	4	1.247	0.753
P25205	435	1.853	Up	K	DNA replication licensing factor MCM3	MCM3	1	0.02695	43.958	VTIAK(1)AGIHAR	3	-0.30638	1	1.299	0.701
O95551	192	1.535	Up	K	Tyrosyl-DNA phosphodiesterase 2	TDP2	1	1.98729e-26	216.34	LK(1)SQEIIPFPSTK	3	-0.81272	3	1.211	0.789
O95551	23	1.835	Up	K	Tyrosyl-DNA phosphodiesterase 2	TDP2	1	1.01446e-26	225.23	EAAEEEGEPEVK(1)K	2	0.65251	4	1.295	0.705
O95551	341	2.073	Up	K	Tyrosyl-DNA phosphodiesterase 2	TDP2	1	0.000107914	119.96	SLDLLGLEK(1)LDCGR	3	-0.4167	3	1.349	0.651
O95551	82	3.331	Up	K	Tyrosyl-DNA phosphodiesterase 2	TDP2	1	3.88689e-26	184.76	RPETISEPK(1)TYVDLTNEETTDSTTSK	3	0.81723	6	1.538	0.462
Q15388	61	1.7	Up	K	Mitochondrial import receptor subunit TOM20 homolog	TOMM20	1	0.00714163	60.157	LPDLK(1)DAEAVQK	3	1.3837	1	1.259	0.741
P46781	121	1.783	Up	K	40S ribosomal protein S9	RPS9	1	0.000866993	92.866	LGLAK(1)SIHHAR	3	0.16247	2	1.281	0.719
Q9NQC3	1171	1.658	Up	K	Reticulon-4	RTN4	1	3.02706e-05	109.07	HQAQIDHYLGLANK(1)NVK	4	0.094746	2	1.248	0.752
P05387	21	2.18	Up	K	60S acidic ribosomal protein P2	RPLP2	1	4.97642e-11	132.6	YVASYLLAALGGNSSPSAK(1)DIK	3	0.4879	3	1.371	0.629
P35659	84	2.149	Up	K	Protein DEK	DEK	1	0.00711046	60.255	EPFTIAQGK(1)GQK	3	-0.3623	2	1.365	0.635
P35659	330	1.523	Up	K	Protein DEK	DEK	0.999874	0.000405661	111.12	KPPTDEELKETIK(1)K	3	-0.88289	2	1.207	0.793
O00767	209	1.846	Up	K	Acyl-CoA desaturase	SCD	1	4.05538e-05	85.563	GSTLDLSDLEAEK(1)LVMFQR	3	-0.1152	3	1.297	0.703
O00767	196	1.565	Up	K	Acyl-CoA desaturase	SCD	1	1.64782e-09	164.53	EK(1)GSTLDLSDLEAEK	2	-0.93256	4	1.22	0.78
Q13501	141	2.087	Up	K	Sequestosome-1	SQSTM1	1	1.23232e-05	100.97	YK(1)CSVCPDYDLCSVCEGK	3	-1.3878	2	1.352	0.648
Q13501	157	2.47	Up	K	Sequestosome-1	SQSTM1	1	6.68985e-13	167.92	CSVCPDYDLCSVCEGK(1)GLHR	3	0.043569	5	1.424	0.576
Q13501	313	1.521	Up	K	Sequestosome-1	SQSTM1	1	1.90255e-21	137.29	K(1)IALESEGRPEEQMESDNCSGGDDDWTHLSSK	4	-0.45465	3	1.207	0.793
P09496	223	1.733	Up	K	Clathrin light chain A	CLTA	1	0.00808595	62.633	LCDFNPK(1)SSK	3	0.54041	2	1.268	0.732
Q15233	239	1.555	Up	K	Non-POU domain-containing octamer-binding protein	NONO	1	3.0399e-15	158.52	PVTVEPMDQLDDEEGLPEK(1)LVIK	3	0.18463	2	1.217	0.783
Q15233	68	1.961	Up	K	Non-POU domain-containing octamer-binding protein	NONO	0.999792	8.4856e-05	128.51	KPGEK(1)TFTQR	3	0.35503	2	1.325	0.675
Q15233	126	1.771	Up	K	Non-POU domain-containing octamer-binding protein	NONO	1	1.20164e-06	141.55	TLAEIAK(1)VELDNMPLR	2	-0.64941	4	1.278	0.722
O14880	149	2.543	Up	K	Microsomal glutathione S-transferase 3	MGST3	1	0.00560013	67.113	SGLGSGPK(1)CCH	3	1.7527	1	1.436	0.564
Q96BQ5	94	1.799	Up	K	Coiled-coil domain-containing protein 127	CCDC127	1	1.37668e-06	142.38	AVAQLSLELEK(1)EQNR	3	-0.44925	1	1.285	0.715
P15880	183	3.462	Up	K	40S ribosomal protein S2	RPS2	0.999035	0.0190315	48.543	IGK(0.001)PHTVPCK(0.999)VTGR	4	-1.0067	1	1.552	0.448
P15880	263	2.201	Up	K	40S ribosomal protein S2	RPS2	1	7.41774e-06	110.12	ETVFTK(1)SPYQEFTDHLVK	4	0.63181	2	1.375	0.625
P15880	65	2.929	Up	K	40S ribosomal protein S2	RPS2	1	0.00191948	78.615	AEDKEWMPVTK(1)LGR	3	0.23066	3	1.491	0.509
P15880	257	1.56	Up	K	40S ribosomal protein S2	RPS2	1	0.000142263	87.429	TYSYLTPDLWK(1)ETVFTK	3	-0.82994	2	1.219	0.781
P40227	377	1.905	Up	K	T-complex protein 1 subunit zeta	CCT6A	1	6.25558e-11	146.11	SVTLLIK(1)GPNK	3	-0.50407	4	1.312	0.688
Q93096	32	1.526	Up	K	Protein tyrosine phosphatase type IVA 1	PTP4A1	1	2.80329e-17	183.65	FLITHNPTNATLNK(1)FIEELK	3	-0.53267	10	1.208	0.792
Q93096	15	2.124	Up	K	Protein tyrosine phosphatase type IVA 1	PTP4A1	1	4.91072e-09	148.85	MNRPAPVEVTYK(1)NMR	4	0.50672	6	1.36	0.64
P19623	135	1.735	Up	K	Spermidine synthase	SRM	1	0.00469837	65.374	K(1)FLPGMAIGYSSSK	3	0.32379	1	1.269	0.731
P26038	79	1.523	Up	K	Moesin	MSN	1	0.00021063	118.81	KESPLLFK(1)FR	3	-0.86724	2	1.207	0.793
Q969G3	271	2.352	Up	K	SWI/SNF-related matrix-associated actin-dependent regulator of chromatin subfamily E member 1	SMARCE1	1	5.53762e-09	160.38	FLESTDSFNNELK(1)R	3	0.20268	2	1.403	0.597
P13489	89	2.558	Up	K	Ribonuclease inhibitor	RNH1	1	1.51671e-11	132.36	IQK(1)LSLQNCCLTGAGCGVLSSTLR	3	0.86246	2	1.438	0.562
P62851	66	1.911	Up	K	40S ribosomal protein S25	RPS25	1	0.0280299	42.708	EVPNYK(1)LITPAVVSER	3	0.62868	1	1.313	0.687
P62851	94	1.804	Up	K	40S ribosomal protein S25	RPS25	1	1.14598e-05	130.77	AALQELLSK(1)GLIK	3	-0.47676	2	1.287	0.713
P62851	114	1.984	Up	K	40S ribosomal protein S25	RPS25	1	2.46055e-19	200.76	NTK(1)GGDAPAAGEDA	2	0.78116	1	1.33	0.67
Q9UNZ2	127	1.924	Up	K	NSFL1 cofactor p47	NSFL1C	1	0.000366012	104.41	GAK(1)EHGAVAVER	3	0.6233	2	1.316	0.684
Q9Y224	171	2.068	Up	K	RNA transcription, translation and transport factor protein	RTRAF	1	0.0346458	40.278	LTQDAVAK(1)ANQTK	3	0.18821	1	1.348	0.652
Q9NTK5	190	1.84	Up	K	Obg-like ATPase 1	OLA1	1	0.000432815	125.74	VK(1)SWVIDQK	2	0.23625	3	1.296	0.704
Q8NFJ5	290	1.884	Up	K	Retinoic acid-induced protein 3	GPRC5A	0.999746	1.31274e-07	126.4	NPMDYPVEDAFCKPQLVK(1)K	3	-0.952	2	1.306	0.694
O15126	298	2.232	Up	K	Secretory carrier-associated membrane protein 1	SCAMP1	1	0.000230334	70.538	TTGASFEK(1)AQQEFATGVMSNK	3	-0.10761	2	1.381	0.619
Q9H0E2	63	1.554	Up	K	Toll-interacting protein	TOLLIP	1	0.000165224	115.65	LNITVVQAK(1)LAK	3	0.033893	1	1.217	0.783
Q9BVX2	17	2.207	Up	K	Transmembrane protein 106C	TMEM106C	1	0.00391601	73.386	K(1)QEDDRDGLLAER	3	-0.7169	2	1.376	0.624
P11142	524	1.658	Up	K	Heat shock cognate 71 kDa protein	HSPA8	1	5.63195e-27	233.62	MVQEAEK(1)YK	2	-0.35973	22	1.247	0.753
P11142	531	2.231	Up	K	Heat shock cognate 71 kDa protein	HSPA8	0.999984	0.00017399	104.94	MVQEAEK(0.99)YK(0.01)AEDEK(1)QR	4	0.18621	2	1.381	0.619
Q86TG7	586	1.505	Up	K	Retrotransposon-derived protein PEG10	PEG10	1	1.291e-20	179.41	NVK(1)DGLITPTIAPNGAQVLQVK(1)R	4	-0.53833	26	1.202	0.798
Q86TG7	590	1.561	Up	K	Retrotransposon-derived protein PEG10	PEG10	1	4.30073e-11	172.8	RGWK(1)LQVSYDCR	4	-0.41482	13	1.219	0.781
Q14739	107	1.641	Up	K	Lamin-B receptor	LBR	1	6.69688e-06	133.47	SASASHQADIK(1)EAR	3	-0.20091	1	1.243	0.757
Q9NVJ2	167	1.633	Up	K	ADP-ribosylation factor-like protein 8B	ARL8B	1	1.02297e-05	119.08	EK(1)DNIDITLQWLIQHSK	3	0.83823	3	1.24	0.76
Q09028	160	1.566	Up	K	Histone-binding protein RBBP4	RBBP4	1	0.00122817	73.833	HPSK(1)PDPSGECNPDLR	3	-0.13765	1	1.221	0.779
O15294	16	1.686	Up	K	UDP-N-acetylglucosamine--peptide N-acetylglucosaminyltransferase 110 kDa subunit	OGT	1	4.36047e-21	206.49	ASSVGNVADSTEPTK(1)R	2	0.36776	2	1.255	0.745
P06703	47	1.67	Up	K	Protein S100-A6	S100A6	1	7.55407e-29	224.16	ELTIGSK(1)LQDAEIAR	2	0.079277	4	1.251	0.749
P27348	9	1.714	Up	K	14-3-3 protein theta	YWHAQ	1	0.000898539	134.48	TELIQK(1)AK	2	0.10558	2	1.263	0.737
P04899	29	5.388	Up	K	Guanine nucleotide-binding protein G(i) subunit alpha-2	GNAI2	1	5.64384e-05	127.52	NLREDGEK(1)AAR	3	0.64962	1	1.687	0.313
Q92769	243	1.557	Up	K	Histone deacetylase 2	HDAC2	1	0.000489284	73.744	DGIDDESYGQIFK(1)PIISK	3	-0.911	2	1.218	0.782
P62424	37	1.788	Up	K	60S ribosomal protein L7a	RPL7A	1	0.0130444	54.09	RPK(1)NFGIGQDIQPK	3	0.67659	1	1.283	0.717
P62424	97	1.516	Up	K	60S ribosomal protein L7a	RPL7A	1	0.00116062	84.053	QTATQLLK(1)LAHK	3	-0.55822	1	1.205	0.795
Q9UBC2	701	1.685	Up	K	Epidermal growth factor receptor substrate 15-like 1	EPS15L1	1	1.14384e-11	104.53	NPSLPSK(1)LDPFESSDPFSSSSVSSK	3	0.051244	2	1.255	0.745
Q9UBC2	838	1.686	Up	K	Epidermal growth factor receptor substrate 15-like 1	EPS15L1	0.971209	0.000241804	64.547	K(0.029)GFGDPFSGK(0.971)DPFVPSSAAKPSK	4	-0.25682	2	1.255	0.745
Q14980	891	1.689	Up	K	Nuclear mitotic apparatus protein 1	NUMA1	1	5.32258e-11	175.15	ALQQVQEK(1)EVR	2	-0.23618	4	1.256	0.744
Q9ULH0	27	1.718	Up	K	Kinase D-interacting substrate of 220 kDa	KIDINS220	0.949147	0.022164	51.726	ALLEK(0.949)CK(0.051)DVDER	3	0.67603	2	1.264	0.736
Q12905	141	1.721	Up	K	Interleukin enhancer-binding factor 2	ILF2	1	1.56791e-06	112.55	ILPTLEAVAALGNK(1)VVESLR	3	-0.77873	2	1.265	0.735
Q9NVI1	523	2.432	Up	K	Fanconi anemia group I protein	FANCI	1	1.52867e-11	186.46	K(1)AMFANQLDAR	3	-0.5146	10	1.417	0.583
Q96CS3	329	1.675	Up	K	FAS-associated factor 2	FAF2	1	0.000432856	97.235	RKEEEVQQQK(1)LAEER	4	0.43915	1	1.252	0.748
Q96PU5	521	1.548	Up	K	E3 ubiquitin-protein ligase NEDD4-like	NEDD4L	1	3.02706e-05	109.07	PFFIDHNTK(1)TTTWEDPR	4	0.80167	3	1.215	0.785
Q9NZ53	533	1.607	Up	K	Podocalyxin-like protein 2	PODXL2	1	2.96332e-05	131.82	LK(1)HVSHGEELR	3	-0.39318	4	1.233	0.767
O75396	169	1.587	Up	K	Vesicle-trafficking protein SEC22b	SEC22B	1	6.97141e-08	130.56	GEALSALDSK(1)ANNLSSLSK	3	1.3772	2	1.227	0.773
Q06481	744	2.297	Up	K	Amyloid-like protein 2	APLP2	1	7.15098e-15	188.44	HLNK(1)MQNHGYENPTYK	3	1.2152	3	1.393	0.607
P49321	657	2.382	Up	K	Nuclear autoantigenic sperm protein	NASP	0.999995	0.00366759	83.137	EKIEDAK(1)ESQR	3	-0.4059	1	1.409	0.591
P63000	183	1.696	Up	K	Ras-related C3 botulinum toxin substrate 1	RAC1	1	0.00849628	66.27	AVLCPPPVK(1)K	3	-0.6105	3	1.258	0.742
P62826	123	2.151	Up	K	GTP-binding nuclear protein Ran	RAN	1	3.53933e-05	106.31	VCENIPIVLCGNK(1)VDIK	3	0.63489	2	1.365	0.635
P62826	134	2.15	Up	K	GTP-binding nuclear protein Ran	RAN	1	0.00213977	110.12	AK(1)SIVFHR	3	0.24616	3	1.365	0.635
P62826	99	1.655	Up	K	GTP-binding nuclear protein Ran	RAN	1	0.00155235	81.017	VTYK(1)NVPNWHR	4	0.59333	2	1.247	0.753
P62826	37	1.981	Up	K	GTP-binding nuclear protein Ran	RAN	1	0.00067076	117.76	HLTGEFEK(1)K	3	-0.41746	2	1.329	0.671
Q07820	40	1.777	Up	K	Induced myeloid leukemia cell differentiation protein Mcl-1	MCL1	1	0.0182814	61.344	LLATEK(1)EASAR	3	-0.34978	1	1.28	0.72
Q7Z5G4	95	1.807	Up	K	Golgin subfamily A member 7	GOLGA7	1	0.000309669	107.34	VSK(1)YIQEQNEK	3	-0.36663	1	1.288	0.712
P00374	158	1.596	Up	K	Dihydrofolate reductase	DHFR	1	0.000313803	75.674	YK(1)LLPEYPGVLSDVQEEK	3	2.7241	2	1.23	0.77
P00374	99	1.68	Up	K	Dihydrofolate reductase	DHFR	1	9.83272e-07	124.46	SLDDALK(1)LTEQPELANK	3	0.85219	1	1.254	0.746
Q9Y2H5	47	1.504	Up	K	Pleckstrin homology domain-containing family A member 6	PLEKHA6	1	0.0570282	44.611	AVAFGK(1)R	2	-0.18286	2	1.201	0.799
P62333	314	2.942	Up	K	26S proteasome regulatory subunit 10B	PSMC6	1	0.00404063	68.044	LDILK(1)IHAGPITK	3	1.1432	2	1.493	0.507
P31946	11	1.661	Up	K	14-3-3 protein beta/alpha	YWHAB	1	0.000661006	138.78	SELVQK(1)AK	2	-0.34406	1	1.248	0.752
Q9BVT8	108	1.791	Up	K	Transmembrane and ubiquitin-like domain-containing protein 1	TMUB1	1	4.52466e-36	247.29	LK(1)FLNDSEQVAR	2	1.0998	3	1.283	0.717
P23497	151	2.497	Up	K	Nuclear autoantigen Sp-100	SP100	1	3.46877e-09	115.87	GFENVIHDK(1)LPLQESEEEEREER	4	0.27894	2	1.428	0.572
P23229	1116	1.605	Up	K	Integrin alpha-6	ITGA6	1	0.00342715	104.2	YIDNLEK(1)K	3	-0.39628	3	1.232	0.768
P60842	225	1.572	Up	K	Eukaryotic initiation factor 4A-I	EIF4A1	1	2.23076e-15	154.66	LNSNTQVVLLSATMPSDVLEVTK(1)K	3	-0.026754	2	1.222	0.778
P60842	381	1.666	Up	K	Eukaryotic initiation factor 4A-I	EIF4A1	1	8.77022e-14	188.13	KGVAINMVTEEDK(1)R	2	-0.64323	8	1.25	0.75
P60842	193	1.607	Up	K	Eukaryotic initiation factor 4A-I	EIF4A1	1	2.42489e-08	156.36	GFK(1)DQIYDIFQK	3	-0.0030052	2	1.233	0.767
P60842	177	1.743	Up	K	Eukaryotic initiation factor 4A-I	EIF4A1	1	3.0287e-06	130.29	YIK(1)MFVLDEADEMLSR	3	-0.29118	3	1.271	0.729
Q9BT67	83	2.189	Up	K	NEDD4 family-interacting protein 1	NDFIP1	1	1.00956e-14	108.78	TK(1)AEATIPLVPGRDEDFVGRDDFDDADQLR	5	-0.16228	6	1.373	0.627
Q9UJ41	281	2.263	Up	K	Rab5 GDP/GTP exchange factor	RABGEF1	1	0.000573867	138.98	K(1)FFSASSR	2	0.49247	2	1.387	0.613
O00161	49	1.985	Up	K	Synaptosomal-associated protein 23	SNAP23	1	3.43919e-06	139.78	TITMLDEQK(1)EQLNR	3	0.34205	2	1.33	0.67
Q16576	101	1.641	Up	K	Histone-binding protein RBBP7	RBBP7	1	3.1e-10	92.865	VHIPNDDAQFDASHCDSDK(1)GEFGGFGSVTGK	4	0.60538	3	1.243	0.757
Q68DH5	621	2.154	Up	K	LMBR1 domain-containing protein 2	LMBRD2	1	6.94303e-05	83.666	NIHTDPK(1)ESNFSDVNTNR	3	-0.6406	1	1.366	0.634
Q68DH5	282	1.511	Up	K	LMBR1 domain-containing protein 2	LMBRD2	1	0.000812187	95.417	KCPTEYQEK(1)MGR	3	0.066534	2	1.204	0.796
Q6NZI2	137	1.62	Up	K	Caveolae-associated protein 1	CAVIN1	1	1.84749e-16	204	K(1)LEVNEAELLR	3	-0.10343	3	1.237	0.763
Q6NZI2	122	1.87	Up	K	Caveolae-associated protein 1	CAVIN1	1	0.00799713	68.657	VSVNVK(1)TVR	3	-0.89262	3	1.303	0.697
Q9H9S3	107	1.703	Up	K	Protein transport protein Sec61 subunit alpha isoform 2	SEC61A2	1	0.00106975	89.266	IIEVGDTPK(1)DR	3	0.31769	1	1.26	0.74
Q92681	522	1.755	Up	K	Regulatory solute carrier protein family 1 member 1	RSC1A1	1	4.86454e-12	109.23	SLSSNFILVK(1)DLGQGIQNSVTDRPETR	4	-0.39438	2	1.274	0.726
P04075	153	1.883	Up	K	Fructose-bisphosphate aldolase A	ALDOA	1	3.18991e-21	181.85	CVLK(1)IGEHTPSALAIMENANVLAR	3	2.7206	4	1.306	0.694
P05023	21	1.634	Up	K	Sodium/potassium-transporting ATPase subunit alpha-1	ATP1A1	1	2.69914e-05	123.28	YEPAAVSEQGDK(1)K	3	0.55675	3	1.241	0.759
P05023	526	1.94	Up	K	Sodium/potassium-transporting ATPase subunit alpha-1	ATP1A1	1	0.0018778	58.712	CSSILLHGK(1)EQPLDEELK	4	-0.54651	2	1.32	0.68
P05023	162	1.894	Up	K	Sodium/potassium-transporting ATPase subunit alpha-1	ATP1A1	1	4.26712e-05	102.64	IMESFK(1)NMVPQQALVIR	3	0.3978	2	1.309	0.691
P05023	683	1.7	Up	K	Sodium/potassium-transporting ATPase subunit alpha-1	ATP1A1	1	3.79084e-05	77.08	DMTSEQLDDILK(1)YHTEIVFAR	4	0.32778	2	1.259	0.741
P67809	137	1.955	Up	K	Nuclease-sensitive element-binding protein 1	YBX1	1	1.16417e-11	135.63	GAEAANVTGPGGVPVQGSK(1)YAADR	3	0.38261	2	1.323	0.677
Q9H000	359	1.91	Up	K	Probable E3 ubiquitin-protein ligase makorin-2	MKRN2	1	0.00739371	80.229	LAEPEK(1)PR	3	0.055823	1	1.313	0.687
P62820	191	2.131	Up	K	Ras-related protein Rab-1A	RAB1A	1	0.00485683	69.216	SNVK(1)IQSTPVK	3	0.53612	2	1.361	0.639
P62191	69	1.747	Up	K	26S proteasome regulatory subunit 4	PSMC1	1	1.33287e-05	128.21	IK(1)DYLLMEEEFIR	3	0.10623	2	1.272	0.728
P45974	793	1.752	Up	K	Ubiquitin carboxyl-terminal hydrolase 5	USP5	1	3.43539e-21	192.78	SAADSISESVPVGPK(1)VR	2	0.41521	7	1.273	0.727
P45974	586	1.878	Up	K	Ubiquitin carboxyl-terminal hydrolase 5	USP5	1	3.38047e-11	155.2	K(1)LDVSIEMPEELDISQLR	3	-0.34015	2	1.305	0.695
P45974	184	1.541	Up	K	Ubiquitin carboxyl-terminal hydrolase 5	USP5	1	7.28585e-13	176.05	HAFSLK(1)QLDNPAR	3	-0.36912	1	1.213	0.787
Q9Y5U9	29	1.505	Up	K	Immediate early response 3-interacting protein 1	IER3IP1	1	2.26136e-06	81.884	FLK(1)NIGWGTDQGIGGFGEEPGIK	3	-1.3687	2	1.202	0.798
P34932	388	1.791	Up	K	Heat shock 70 kDa protein 4	HSPA4	1	1.50606e-15	191.19	GCALQCAILSPAFK(1)VR	3	-0.28549	2	1.283	0.717
Q96GG9	149	1.585	Up	K	DCN1-like protein 1	DCUN1D1	1	1.09317e-06	159.94	MEQELK(1)EPGR	2	-0.088303	5	1.226	0.774
Q96GG9	57	1.766	Up	K	DCN1-like protein 1	DCUN1D1	1	0.000607839	121.6	ESVK(1)GSLDR	3	-0.15285	4	1.277	0.723
Q96GG9	143	1.507	Up	K	DCN1-like protein 1	DCUN1D1	1	8.81482e-05	117.2	AQIPK(1)MEQELK	3	0.040716	8	1.202	0.798
Q9UBQ0	43	1.658	Up	K	Vacuolar protein sorting-associated protein 29	VPS29	1	0.000165691	75.215	IQHILCTGNLCTK(1)ESYDYLK	4	1.1036	1	1.248	0.752
O43169	30	1.564	Up	K	Cytochrome b5 type B	CYB5B	1	0.035667	89.369	LEEVAK(1)R	2	-1.3217	1	1.22	0.78
Q8N697	311	1.752	Up	K	Solute carrier family 15 member 4	SLC15A4	1	0.00299564	65.038	MSHGGPFTEEK(1)VEDVK	3	-0.086539	1	1.273	0.727
Q9UG63	203	1.704	Up	K	ATP-binding cassette sub-family F member 2	ABCF2	1	0.000488196	99.539	LEELDADK(1)AEMR	3	0.66673	3	1.26	0.74
Q9UG63	436	1.534	Up	K	ATP-binding cassette sub-family F member 2	ABCF2	1	6.09979e-05	119.45	VALVGPNGAGK(1)STLLK	3	-0.40954	2	1.211	0.789
Q9UG63	174	2.499	Up	K	ATP-binding cassette sub-family F member 2	ABCF2	1	0.00365262	81.972	AMLEK(1)EAER	3	0.025265	1	1.428	0.572
Q9UG63	522	1.633	Up	K	ATP-binding cassette sub-family F member 2	ABCF2	1	0.025088	46.39	NLSDGQK(1)CR	3	0.044014	2	1.241	0.759
Q9UG63	618	1.521	Up	K	ATP-binding cassette sub-family F member 2	ABCF2	1	0.00120498	89.731	LVDEEPQLTK(1)R	3	-0.17929	2	1.207	0.793
Q9P0L0	205	2.453	Up	K	Vesicle-associated membrane protein-associated protein A	VAPA	0.999999	4.57139e-05	108.71	K(1)VAHSDKPGSTSTASFR	3	-0.5009	1	1.421	0.579
Q13148	176	1.589	Up	K	TAR DNA-binding protein 43	TARDBP	1	0.0164451	51.162	WCDCK(1)LPNSK	3	0.18421	2	1.228	0.772
P30050	86	2.933	Up	K	60S ribosomal protein L12	RPL12	1	0.0231901	53.756	ALK(1)EPPRDR	3	-0.10994	1	1.492	0.508
Q9NVA4	428	2.551	Up	K	Transmembrane protein 184C	TMEM184C	0.949536	4.02364e-06	111.63	ISDEILSDTIGEK(0.95)K(0.05)EPSDK	4	-2.5674	2	1.437	0.563
Q8TC07	81	1.599	Up	K	TBC1 domain family member 15	TBC1D15	0.999937	0.0399507	43.37	KDSSSVVEWTQAPK(1)ER	3	-1.7391	1	1.23	0.77
O00425	440	1.804	Up	K	Insulin-like growth factor 2 mRNA-binding protein 3	IGF2BP3	1	0.000199578	79.393	FAGASIK(1)IAPAEAPDAK	3	1.0935	2	1.287	0.713
Q13443	781	1.847	Up	K	Disintegrin and metalloproteinase domain-containing protein 9	ADAM9	1	7.47989e-06	77.576	FAVPTYAAK(1)QPQQFPSRPPPPQPK	4	0.20224	2	1.297	0.703
O43765	160	1.725	Up	K	Small glutamine-rich tetratricopeptide repeat-containing protein alpha	SGTA	1	1.01918e-08	150.49	AICIDPAYSK(1)AYGR	2	-0.5164	4	1.266	0.734
P51665	180	1.6	Up	K	26S proteasome non-ATPase regulatory subunit 7	PSMD7	1	0.00013872	119.17	DIK(1)DTTVGTLSQR	3	0.16099	2	1.231	0.769
P51665	279	1.801	Up	K	26S proteasome non-ATPase regulatory subunit 7	PSMD7	1	3.27718e-21	208.47	SVVALHNLINNK(1)IANR	3	0.92305	2	1.286	0.714
Q96F44	141	1.584	Up	K	E3 ubiquitin-protein ligase TRIM11	TRIM11	1	0.0605292	47.187	LEK(1)SLEHLR	3	0.058771	1	1.226	0.774
Q5T6V5	162	1.811	Up	K	Queuosine salvage protein	C9orf64	1	2.42613e-06	139.3	ILLEK(1)FGGSFLNCVR	3	0.081556	2	1.288	0.712
Q8TCT9	61	1.952	Up	K	Minor histocompatibility antigen H13	HM13	1	2.95622e-13	172.85	GK(1)NASDMPETITSR	3	0.64791	4	1.323	0.677
P78527	163	1.926	Up	K	DNA-dependent protein kinase catalytic subunit	PRKDC	1	0.00369143	85.676	FYGELALK(1)K	3	-0.57865	1	1.316	0.684
P78527	1489	1.618	Up	K	DNA-dependent protein kinase catalytic subunit	PRKDC	1	8.47291e-07	66.1	AGLLHNILPSQSTDLHHSVGTELLSLVYK(1)GIAPGDER	5	0.34227	2	1.236	0.764
P78527	148	1.697	Up	K	DNA-dependent protein kinase catalytic subunit	PRKDC	1	1.18877e-05	130.19	LMDEFK(1)IGELFSK	3	-0.38659	3	1.258	0.742
P78527	225	2.018	Up	K	DNA-dependent protein kinase catalytic subunit	PRKDC	1	3.90777e-08	124.91	LPVLAGCLK(1)GLSSLLCNFTK	3	-1.1386	2	1.337	0.663
P78527	4023	1.582	Up	K	DNA-dependent protein kinase catalytic subunit	PRKDC	1	0.000145211	116.79	K(1)GGSWIQEINVAEK	3	-0.95557	2	1.225	0.775
P78527	1628	2.498	Up	K	DNA-dependent protein kinase catalytic subunit	PRKDC	1	0.0329243	45.158	K(1)CDSWWAK	2	-0.68387	2	1.428	0.572
P78527	1074	1.738	Up	K	DNA-dependent protein kinase catalytic subunit	PRKDC	1	1.13105e-05	133.05	LYSLALHPNAFK(1)R	3	0.32139	6	1.27	0.73
P78527	3884	1.727	Up	K	DNA-dependent protein kinase catalytic subunit	PRKDC	1	0.00370873	101.6	VPADLLK(1)R	2	0.26134	2	1.267	0.733
P78527	471	1.528	Up	K	DNA-dependent protein kinase catalytic subunit	PRKDC	1	0.000397729	101.5	VFLALAAK(1)GPVLR	3	0.073835	4	1.209	0.791
P78527	2334	1.582	Up	K	DNA-dependent protein kinase catalytic subunit	PRKDC	1	3.0048e-14	190.44	K(1)NILEESLCELVAK	2	-0.32209	4	1.225	0.775
P78527	1407	1.654	Up	K	DNA-dependent protein kinase catalytic subunit	PRKDC	1	1.72393e-05	121.82	ALK(1)MSPYK	2	-1.4563	5	1.246	0.754
P78527	2127	1.994	Up	K	DNA-dependent protein kinase catalytic subunit	PRKDC	1	0.00108422	85.813	DLPSWMK(1)FLHGK	3	0.27203	2	1.332	0.668
P78527	1456	1.727	Up	K	DNA-dependent protein kinase catalytic subunit	PRKDC	1	5.51714e-09	166.04	LAAVVSACK(1)QLHR	2	0.30872	6	1.267	0.733
P78527	1744	1.513	Up	K	DNA-dependent protein kinase catalytic subunit	PRKDC	1	0.00208919	83.883	FNNYVDCMK(1)K	3	-0.39555	3	1.204	0.796
P78527	1913	1.602	Up	K	DNA-dependent protein kinase catalytic subunit	PRKDC	1	2.46215e-09	120.23	INQVFHGSCITEGNELTK(1)TLIK	4	-0.46652	4	1.231	0.769
P78527	205	1.742	Up	K	DNA-dependent protein kinase catalytic subunit	PRKDC	1	3.76352e-09	153.85	AFLGELK(1)TQMTSAVR	3	-2.4306	3	1.271	0.729
P78527	2263	2.094	Up	K	DNA-dependent protein kinase catalytic subunit	PRKDC	1	0.00507416	75.825	FSGK(1)DPNSK	3	-0.28289	6	1.354	0.646
P78527	1042	1.663	Up	K	DNA-dependent protein kinase catalytic subunit	PRKDC	1	0.000194221	113.34	WSIK(1)QITPQQQEK	3	0.77119	3	1.249	0.751
P78527	2102	1.897	Up	K	DNA-dependent protein kinase catalytic subunit	PRKDC	1	3.00688e-09	146.96	HECMAPLTALVK(1)HMHR	4	-0.87433	2	1.31	0.69
P42566	788	1.598	Up	K	Epidermal growth factor receptor substrate 15	EPS15	1	0.027941	43.305	IGTPTRPCPLPPGK(1)R	4	-0.071978	1	1.23	0.77
Q9NP97	9	1.708	Up	K	Dynein light chain roadblock-type 1	DYNLRB1	1	0.0014707	99.815	AEVEETLK(1)R	2	1.6941	1	1.262	0.738
P08238	538	2.123	Up	K	Heat shock protein HSP 90-beta	HSP90AB1	0.999997	5.76843e-05	76.492	SLVSVTK(1)EGLELPEDEEEKKK	4	0.6858	1	1.36	0.64
P08238	607	1.999	Up	K	Heat shock protein HSP 90-beta	HSP90AB1	1	0.00553115	97.033	IMK(1)AQALR	2	-1.048	2	1.333	0.667
P08238	624	2.357	Up	K	Heat shock protein HSP 90-beta	HSP90AB1	1	0.000451032	89.374	K(1)HLEINPDHPIVETLR	4	0.1714	2	1.404	0.596
Q16739	44	1.923	Up	K	Ceramide glucosyltransferase	UGCG	1	0.0450598	42.19	ATDK(1)QPYSK	2	-0.26412	1	1.316	0.684
Q5TDH0	389	2.156	Up	K	Protein DDI1 homolog 2	DDI2	1	3.80488e-21	167.99	EDVRPEEIADQELAEALQK(1)SAEDAER	3	-0.45163	6	1.366	0.634
Q01650	30	1.691	Up	K	Large neutral amino acids transporter small subunit 1	SLC7A5	1	1.21252e-25	179.19	MLAAK(1)SADGSAPAGEGEGVTLQR	3	-0.70035	15	1.257	0.743
O60331	97	2.654	Up	K	Phosphatidylinositol 4-phosphate 5-kinase type-1 gamma	PIP5K1C	1	1.07053e-05	93.776	GAIQLGIGYTVGHLSSK(1)PER	4	0.80872	3	1.453	0.547
Q13151	106	1.94	Up	K	Heterogeneous nuclear ribonucleoprotein A0	HNRNPA0	1	2.57323e-12	116.24	LFVGGLK(1)GDVAEGDLIEHFSQFGTVEK	4	0.16858	3	1.32	0.68
P63104	158	1.973	Up	K	14-3-3 protein zeta/delta	YWHAZ	1	0.00150269	88.155	K(1)EMQPTHPIR	3	-0.51003	1	1.327	0.673
P63104	120	1.632	Up	K	14-3-3 protein zeta/delta	YWHAZ	1	0.0242414	76.847	VFYLK(1)MK	2	-0.71936	2	1.24	0.76
P63104	139	1.627	Up	K	14-3-3 protein zeta/delta	YWHAZ	1	5.59524e-05	81.878	K(1)GIVDQSQQAYQEAFEISK	3	-0.41579	1	1.239	0.761
Q9HC07	199	1.572	Up	K	Transmembrane protein 165	TMEM165	0.829399	0.0574944	59.35	K(0.829)K(0.171)DEEFQR	3	0.68679	2	1.223	0.777
P41440	479	2.264	Up	K	Folate transporter 1	SLC19A1	1	8.19944e-32	237.4	SAAEEK(1)AAQALSVQDK	2	-0.1027	3	1.387	0.613
Q96LD4	257	3.621	Up	K	Tripartite motif-containing protein 47	TRIM47	1	0.00115671	89.231	TVALIK(1)SAAVAER	3	-0.071949	2	1.567	0.433
P30447	340	1.719	Up	K	HLA class I histocompatibility antigen, A-23 alpha chain	HLA-A	1	3.91017e-27	191.2	K(1)GGSYSQAASSDSAQGSDVSLTACK(1)V	3	0.68273	11	1.265	0.735
P30447	364	1.668	Up	K	HLA class I histocompatibility antigen, A-23 alpha chain	HLA-A	1	6.01216e-15	142.56	KGGSYSQAASSDSAQGSDVSLTACK(1)V	3	1.7725	9	1.25	0.75
P37837	130	1.832	Up	K	Transaldolase	TALDO1	1	0.000711232	94.402	LIELYK(1)EAGISK	3	0.32109	3	1.294	0.706
P37837	277	2.607	Up	K	Transaldolase	TALDO1	1	6.39531e-05	98.408	LVPVLSAK(1)AAQASDLEK	3	0.27014	2	1.446	0.554
P25789	176	1.662	Up	K	Proteasome subunit alpha type-4	PSMA4	1	0.00389659	53.359	ATCIGNNSAAAVSMLK(1)QDYK	3	-0.060473	1	1.249	0.751
P14625	434	2.233	Up	K	Endoplasmin	HSP90B1	1	0.00353222	53.625	YLNFVK(1)GVVDSDDLPLNVSR	3	0.35799	2	1.381	0.619
P48449	432	1.725	Up	K	Lanosterol synthase	LSS	1	1.28599e-06	139.58	LSQVPDNPPDYQK(1)YYR	3	0.21611	4	1.266	0.734
Q9NRR8	15	1.772	Up	K	CDC42 small effector protein 1	CDC42SE1	1	4.26763e-07	146.16	LGCCVVEK(1)PQPK	3	-0.40749	4	1.279	0.721
Q8NE01	462	1.756	Up	K	Metal transporter CNNM3	CNNM3	1	7.32282e-07	135.47	SEILDESEDYRDTVVK(1)R	3	-0.90735	3	1.274	0.726
Q13286	262	1.678	Up	K	Battenin	CLN3	1	1.06735e-06	130.27	TEAPESK(1)PGSSSSLSLR	3	1.5218	3	1.253	0.747
P63165	16	2.576	Up	K	Small ubiquitin-related modifier 1	SUMO1	1	7.43216e-21	200.81	SDQEAKPSTEDLGDK(1)K	3	-0.22947	3	1.441	0.559
P20020	1172	1.738	Up	K	Plasma membrane calcium-transporting ATPase 1	ATP2B1	1	0.00124148	80.96	SSLYEGLEK(1)PESR	3	-0.082794	2	1.27	0.73
P20020	62	1.682	Up	K	Plasma membrane calcium-transporting ATPase 1	ATP2B1	1	8.32615e-07	133.96	KIQESYGDVYGICTK(1)LK	3	-0.19533	6	1.254	0.746
P62937	28	2.706	Up	K	Peptidyl-prolyl cis-trans isomerase A	PPIA	1	0.000137336	117.21	VSFELFADK(1)VPK	3	-0.38155	2	1.46	0.54
P62937	82	1.742	Up	K	Peptidyl-prolyl cis-trans isomerase A	PPIA	1	0.000290861	101.3	SIYGEK(1)FEDENFILK	3	0.14977	3	1.271	0.729
Q96JB5	166	1.719	Up	K	CDK5 regulatory subunit-associated protein 3	CDK5RAP3	1	0.000530661	73.918	EQFYHSCK(1)QYGITGENVR	3	0.19587	2	1.264	0.736
P61978	52	2.215	Up	K	Heterogeneous nuclear ribonucleoprotein K	HNRNPK	1	0.000713081	92.856	ILLQSK(1)NAGAVIGK	3	0.44911	1	1.378	0.622
P61978	60	2.09	Up	K	Heterogeneous nuclear ribonucleoprotein K	HNRNPK	1	0.000539962	103.87	NAGAVIGK(1)GGK	2	1.9052	1	1.353	0.647
Q13263	319	1.819	Up	K	Transcription intermediary factor 1-beta	TRIM28	1	1.56607e-09	161.24	VLVNDAQK(1)VTEGQQER	3	-0.22309	3	1.29	0.71
P43003	534	9.113	Up	K	Excitatory amino acid transporter 1	SLC1A3	0.997339	2.16627e-06	92.002	DVEMGNSVIEENEMK(0.763)K(0.24)PYQLIAQDNETEK(0.997)PIDSETK	4	-0.022284	2	1.802	0.198
P61956	33	2.669	Up	K	Small ubiquitin-related modifier 2	SUMO2	1	1.55739e-08	149.82	VAGQDGSVVQFK(1)IK	2	0.96823	4	1.455	0.545
P61956	7	2.577	Up	K	Small ubiquitin-related modifier 2	SUMO2	0.997932	7.01069e-05	124.39	ADEK(0.002)PK(0.998)EGVK	2	0.8967	4	1.441	0.559
P61956	45	2.109	Up	K	Small ubiquitin-related modifier 2	SUMO2	1	0.00137626	125.82	LMK(1)AYCER	2	-0.75112	6	1.357	0.643
P43243	522	1.649	Up	K	Matrin-3	MATR3	1	0.00533364	82.287	LAEPYGK(1)IK	2	-0.083087	3	1.245	0.755
P43243	515	1.746	Up	K	Matrin-3	MATR3	1	2.65784e-12	118.05	VIHLSNLPHSGYSDSAVLK(1)LAEPYGK	5	0.73476	4	1.272	0.728
Q9NZL4	210	1.714	Up	K	Hsp70-binding protein 1	HSPBP1	1	0.00080484	92.247	VK(1)ALFAISCLVR	3	0.018538	2	1.263	0.737
P34741	193	1.778	Up	K	Syndecan-2	SDC2	1	3.18211e-08	151.3	KPSSAAYQK(1)APTK	3	-0.14603	2	1.28	0.72
Q9BVP2	267	1.879	Up	K	Guanine nucleotide-binding protein-like 3	GNL3	1	4.38375e-06	110.74	VGVIGFPNVGK(1)SSIINSLK	3	0.74255	2	1.305	0.695
Q13185	159	1.829	Up	K	Chromobox protein homolog 3	CBX3	1	8.26277e-07	127.97	EANMK(1)CPQIVIAFYEER	3	0.37714	2	1.293	0.707
Q13185	21	2.059	Up	K	Chromobox protein homolog 3	CBX3	1	0.00873078	58.817	K(1)VEEAEPEEFVVEK	3	0.16142	1	1.346	0.654
P49915	182	2.255	Up	K	GMP synthase [glutamine-hydrolyzing]	GMPS	1	3.89704e-05	121.92	SGNIVAGIANESK(1)K	2	1.8098	4	1.386	0.614
Q96RL1	31	1.663	Up	K	BRCA1-A complex subunit RAP80	UIMC1	1	1.26548e-08	164.04	DVETTSSVSVK(1)R	2	-1.002	3	1.249	0.751
Q96RL1	20	1.917	Up	K	BRCA1-A complex subunit RAP80	UIMC1	1	1.62374e-18	198.29	K(1)DVETTSSVSVK	2	-0.49579	3	1.314	0.686
Q96RL1	485	2.883	Up	K	BRCA1-A complex subunit RAP80	UIMC1	0.999321	8.90853e-11	168.5	IIMADK(0.001)EVGNK(0.999)EDAEK	4	-0.15615	3	1.485	0.515
P32969	50	1.597	Up	K	60S ribosomal protein L9	RPL9	1	0.000282487	104.95	DFNHINVELSLLGK(1)K	3	-0.019154	3	1.23	0.77
P32969	184	1.886	Up	K	60S ribosomal protein L9	RPL9	1	6.96812e-06	109.87	KFLDGIYVSEK(1)GTVQQADE	3	1.0965	2	1.307	0.693
P32969	174	1.537	Up	K	60S ribosomal protein L9	RPL9	1	5.11543e-11	171.32	K(1)FLDGIYVSEK	2	-1.0341	4	1.212	0.788
P32969	65	1.913	Up	K	60S ribosomal protein L9	RPL9	1	0.00234757	127.46	K(1)ELATVR	2	0.2374	2	1.313	0.687
Q9BRS8	205	1.594	Up	K	La-related protein 6	LARP6	1	0.064595	49.448	LWALATPQK(1)NGR	2	-0.063908	1	1.229	0.771
P62873	280	1.781	Up	K	Guanine nucleotide-binding protein G(I)/G(S)/G(T) subunit beta-1	GNB1	1	5.84732e-08	87.419	ADQELMTYSHDNIICGITSVSFSK(1)SGR	4	-0.34191	2	1.281	0.719
P61927	31	1.913	Up	K	60S ribosomal protein L37	RPL37	1	0.00150574	81.525	AYHLQK(1)STCGK	3	-0.4057	2	1.313	0.687
P61019	130	1.639	Up	K	Ras-related protein Rab-2A	RAB2A	0.939866	0.000326873	106.58	REVK(0.94)K(0.06)EEGEAFAR	3	-0.60655	3	1.242	0.758
P62888	23	1.535	Up	K	60S ribosomal protein L30	RPL30	1	0.000370895	128.86	LQLVMK(1)SGK	2	0.14034	6	1.211	0.789
P62888	44	1.666	Up	K	60S ribosomal protein L30	RPL30	1	2.76124e-09	164.11	AK(1)LVILANNCPALR	2	0.72917	4	1.25	0.75
Q17RB0	9	1.596	Up	K	Retrotransposon Gag-like protein 8B	RTL8B	1	0.000129721	119.62	VQLMK(1)ALLAR	3	-0.58879	2	1.23	0.77
P54727	151	1.649	Up	K	UV excision repair protein RAD23 homolog B	RAD23B	0.89573	6.77243e-13	119.35	QEK(0.104)PAEK(0.896)PAETPVATSPTATDSTSGDSSR	3	0.63445	2	1.245	0.755
Q9Y617	333	2.631	Up	K	Phosphoserine aminotransferase	PSAT1	1	1.86321e-08	153.74	ALELNMLSLK(1)GHR	4	-0.77373	2	1.449	0.551
Q9Y617	51	3.182	Up	K	Phosphoserine aminotransferase	PSAT1	1	7.40204e-10	163.64	SSDFAK(1)IINNTENLVR	3	-1.0416	3	1.522	0.478
Q9Y617	323	1.736	Up	K	Phosphoserine aminotransferase	PSAT1	1	1.23439e-13	183.96	FLDK(1)ALELNMLSLK	2	0.26986	5	1.269	0.731
O15427	428	2.177	Up	K	Monocarboxylate transporter 4	SLC16A3	0.957059	7.69998e-20	150.36	EPQPEVAAAEEEK(0.957)LHK(0.043)PPADSGVDLR	4	-0.38135	9	1.37	0.63
P36956	1121	1.561	Up	K	Sterol regulatory element-binding protein 1	SREBF1	1	0.00992614	83.309	TLEK(1)LGDR	2	-1.7575	2	1.219	0.781
Q00765	172	2.362	Up	K	Receptor expression-enhancing protein 5	REEP5	1	0.00184081	86.114	ETADAITK(1)EAK	2	-0.13005	1	1.405	0.595
Q15154	492	1.523	Up	K	Pericentriolar material 1 protein	PCM1	1	0.0028712	101.33	LQK(1)LNEVR	3	-0.24403	1	1.207	0.793
Q15154	393	1.746	Up	K	Pericentriolar material 1 protein	PCM1	1	1.65528e-05	140.01	LPDEK(1)VELFSK	2	0.043039	4	1.272	0.728
Q15154	1198	1.874	Up	K	Pericentriolar material 1 protein	PCM1	1	4.36738e-05	127.52	K(1)LPEEEVESSR	3	0.96968	4	1.304	0.696
Q8NBR6	548	3.762	Up	K	Ubiquitin carboxyl-terminal hydrolase MINDY-2	MINDY2	1	0.00232171	99.013	K(1)LQEEEDRR	3	-1.2359	2	1.58	0.42
P61313	83	2.098	Up	K	60S ribosomal protein L15	RPL15	1	0.00023703	97.203	GATYGK(1)PVHHGVNQLK	4	-0.90289	3	1.354	0.646
O43396	102	1.525	Up	K	Thioredoxin-like protein 1	TXNL1	1	0.000186998	81.157	IDQYQGADAVGLEEK(1)IK	3	-1.4891	1	1.208	0.792
P36897	502	2.653	Up	K	TGF-beta receptor type-1	TGFBR1	1	0.000414735	106.11	TLSQLSQQEGIK(1)M	2	-1.4467	1	1.453	0.547
Q9BQG0	498	1.525	Up	K	Myb-binding protein 1A	MYBBP1A	0.994392	8.97565e-05	74.364	K(0.006)PTSQIPETK(0.994)HPFSFPLENQAR	4	0.41449	1	1.208	0.792
P63244	139	1.914	Up	K	Receptor of activated protein C kinase 1	RACK1	1	2.43698e-27	191.41	LWNTLGVCK(1)YTVQDESHSEWVSCVR	4	0.39766	2	1.314	0.686
P63244	12	1.765	Up	K	Receptor of activated protein C kinase 1	RACK1	1	4.42151e-05	62.57	GTLK(1)GHNGWVTQIATTPQFPDMILSASR	4	0.91019	2	1.277	0.723
P63244	106	1.932	Up	K	Receptor of activated protein C kinase 1	RACK1	1	1.4532e-42	242.45	RFVGHTK(1)DVLSVAFSSDNR	4	-0.081434	15	1.318	0.682
P63244	175	1.963	Up	K	Receptor of activated protein C kinase 1	RACK1	1	0.0226617	58.474	LVK(1)VWNLANCK	3	-0.15535	1	1.325	0.675
Q02878	237	2.204	Up	K	60S ribosomal protein L6	RPL6	1	1.40773e-18	191.65	HQEGEIFDTEK(1)EK	3	0.3898	4	1.376	0.624
Q02878	130	2.009	Up	K	60S ribosomal protein L6	RPL6	0.834408	0.000979892	85.837	LLSHGK(0.834)K(0.166)PFSQHVR	4	0.40201	1	1.335	0.665
Q02878	210	1.753	Up	K	60S ribosomal protein L6	RPL6	1	0.00025216	115.92	IPK(1)HLTDAYFK	3	-0.12187	4	1.274	0.726
Q02878	207	1.701	Up	K	60S ribosomal protein L6	RPL6	1	7.6451e-07	149.96	IDISNVK(1)IPK	2	-0.20702	6	1.26	0.74
Q02878	192	1.681	Up	K	60S ribosomal protein L6	RPL6	1	0.00900984	55.196	THQK(1)FVIATSTK	3	1.2178	1	1.254	0.746
Q02878	239	2.049	Up	K	60S ribosomal protein L6	RPL6	1	3.73929e-05	144.77	EK(1)YEITEQR	3	0.22597	3	1.344	0.656
Q02878	262	2.317	Up	K	60S ribosomal protein L6	RPL6	1	1.58362e-05	130.01	IK(1)AIPQLQGYLR	3	0.19309	3	1.397	0.603
Q02878	87	2.937	Up	K	60S ribosomal protein L6	RPL6	1	0.000553948	98.508	EK(1)VLATVTKPVGGDK	3	-0.61305	2	1.492	0.508
P48509	8	1.671	Up	K	CD151 antigen	CD151	1	1.07985e-05	143.97	K(1)TTCGTVCLK	2	0.78392	2	1.251	0.749
P52789	488	2.098	Up	K	Hexokinase-2	HK2	1	0.000200433	83.404	TLEHLQLSHDQLLEVK(1)R	4	1.0209	1	1.354	0.646
Q96PK6	126	1.554	Up	K	RNA-binding protein 14	RBM14	1	0.00955421	59.227	EADAK(1)AAIAQLNGK	3	-3.7692	2	1.217	0.783
Q99729	101	1.642	Up	K	Heterogeneous nuclear ribonucleoprotein A/B	HNRNPAB	1	5.41649e-06	121.45	FGEVVDCTIK(1)MDPNTGR	3	-0.46046	2	1.243	0.757
P33993	89	1.707	Up	K	DNA replication licensing factor MCM7	MCM7	1	0.000126378	106.6	LFADAVQELLPQYK(1)ER	3	0.88582	2	1.261	0.739
P63173	57	1.595	Up	K	60S ribosomal protein L38	RPL38	1	0.0266676	44.71	LK(1)QSLPPGLAVK	3	0.42094	1	1.229	0.771
P02545	311	2.774	Up	K	Prelamin-A/C	LMNA	1	1.60201e-09	146.2	IDSLSAQLSQLQK(1)QLAAK	3	-0.19372	2	1.47	0.53
P41250	99	1.775	Up	K	Glycine--tRNA ligase	GARS	1	0.00343118	107.9	AVAELK(1)AR	2	-0.97145	1	1.279	0.721
P18621	55	1.899	Up	K	60S ribosomal protein L17	RPL17	1	2.51161e-08	160.18	DVTLQK(1)QCVPFR	2	0.46269	3	1.31	0.69
P17812	466	1.727	Up	K	CTP synthase 1	CTPS1	1	1.98867e-05	128.57	K(1)LYGDADYLEER	2	-0.163	3	1.267	0.733
P17812	309	1.735	Up	K	CTP synthase 1	CTPS1	1	0.000417122	100.69	YTK(1)FSDSYASVIK	3	-1.1239	1	1.269	0.731
P17812	331	2.439	Up	K	CTP synthase 1	CTPS1	1	0.000168309	101.01	ALEHSALAINHK(1)LEIK	4	-0.42432	2	1.418	0.582
P17812	557	2.269	Up	K	CTP synthase 1	CTPS1	1	0.064538	42.336	LSHYLQK(1)GCR	3	1.0124	1	1.388	0.612
P10412	85	1.634	Up	K	Histone H1.4	HIST1H1E	1	0.00281237	96.171	LGLK(1)SLVSK	2	0.68198	2	1.241	0.759
P10412	64	1.711	Up	K	Histone H1.4	HIST1H1E	1	2.05287e-08	160.84	K(1)ALAAAGYDVEK	3	0.53803	3	1.262	0.738
P10412	17	1.501	Up	K	Histone H1.4	HIST1H1E	1	3.87132e-12	161.99	SETAPAAPAAPAPAEK(1)TPVK	2	0.15309	4	1.2	0.8
P62805	78	1.538	Up	K	Histone H4	HIST1H4A	1	0.000109247	120.63	DAVTYTEHAK(1)R	3	-0.19012	1	1.212	0.788
Q06546	359	1.841	Up	K	GA-binding protein alpha chain	GABPA	1	0.00497838	61.167	LNQPELVAQK(1)WGQR	3	-0.40168	1	1.296	0.704
P35579	860	2.444	Up	K	Myosin-9	MYH9	1	0.00420622	88.495	EK(1)QLAAENR	2	0.11373	1	1.419	0.581
P42166	674	1.694	Up	K	Lamina-associated polypeptide 2, isoform alpha	TMPO	1	1.077e-05	103.87	LASTPFK(1)GGTLFGGEVCK	3	0.53437	2	1.258	0.742
Q9H4A4	398	1.655	Up	K	Aminopeptidase B	RNPEP	1	0.00915228	49.528	VK(1)IEPGVDPDDTYNETPYEK	3	-0.05427	1	1.247	0.753
P25398	93	2.208	Up	K	40S ribosomal protein S12	RPS12	1	0.000420005	101.39	LGEWVGLCK(1)IDR	3	0.18534	1	1.377	0.623
P25398	129	1.573	Up	K	40S ribosomal protein S12	RPS12	1	0.000477942	105.98	DVIEEYFK(1)CK	3	0.031521	7	1.223	0.777
O14828	81	1.631	Up	K	Secretory carrier-associated membrane protein 3	SCAMP3	1	8.07305e-13	117.57	LSPTEPK(1)NYGSYSTQASAAAATAELLK	3	-0.2288	6	1.24	0.76
O14828	74	1.514	Up	K	Secretory carrier-associated membrane protein 3	SCAMP3	1	0.000978687	130.66	K(1)LSPTEPK	2	-0.41016	2	1.204	0.796
P62913	8	1.984	Up	K	60S ribosomal protein L11	RPL11	1	7.34638e-06	138.89	AQDQGEK(1)ENPMR	2	-0.54318	3	1.33	0.67
P62913	19	1.73	Up	K	60S ribosomal protein L11	RPL11	1	5.25622e-06	137.62	K(1)LCLNICVGESGDR	2	0.62881	4	1.267	0.733
Q9NS91	186	2.915	Up	K	E3 ubiquitin-protein ligase RAD18	RAD18	1	1.22272e-11	138.82	SVEEIAPDPSEAK(1)RPEPPSTSTLK	3	0.13654	8	1.489	0.511
Q9NS91	151	1.52	Up	K	E3 ubiquitin-protein ligase RAD18	RAD18	1	0.000638213	89.992	EMSGSTSELLIK(1)ENK	3	-0.25655	2	1.206	0.794
O00571	491	2.174	Up	K	ATP-dependent RNA helicase DDX3X	DDX3X	1	5.8593e-05	119.65	SGK(1)SPILVATAVAAR	3	0.56652	3	1.37	0.63
P63092	8	1.507	Up	K	Guanine nucleotide-binding protein G(s) subunit alpha isoforms short	GNAS	1	0.0147221	63.473	GCLGNSK(1)TEDQR	3	-0.52334	1	1.202	0.798
P63092	216	1.824	Up	K	Guanine nucleotide-binding protein G(s) subunit alpha isoforms short	GNAS	1	0.00115841	69.979	FQVDK(1)VNFHMFDVGGQR	3	-2.8051	2	1.292	0.708
P09382	37	2.776	Up	K	Galectin-1	LGALS1	1	1.97978e-06	109.72	SFVLNLGK(1)DSNNLCLHFNPR	4	0.41945	1	1.47	0.53
Q15185	79	2.709	Up	K	Prostaglandin E synthase 3	PTGES3	1	0.00049735	101.89	K(1)GESGQSWPR	2	0.63923	1	1.461	0.539
Q02543	11	1.61	Up	K	60S ribosomal protein L18a	RPL18A	1	0.00671689	111.65	EYK(1)VVGR	2	0.38535	2	1.234	0.766
Q02543	143	1.714	Up	K	60S ribosomal protein L18a	RPL18A	1	6.64971e-05	124.12	RPAVK(1)QFHDSK	4	0.030954	2	1.263	0.737
P27635	198	1.996	Up	K	60S ribosomal protein L10	RPL10	1	0.000662151	94.122	LIPDGCGVK(1)YIPNR	3	-0.59459	3	1.332	0.668
P04406	139	2.508	Up	K	Glyceraldehyde-3-phosphate dehydrogenase	GAPDH	1	1.77613e-12	118.54	VIISAPSADAPMFVMGVNHEK(1)YDNSLK	4	-0.28377	2	1.43	0.57
P04406	61	37.628	Up	K	Glyceraldehyde-3-phosphate dehydrogenase	GAPDH	1	3.13477e-16	208.63	FHGTVK(1)AENGK	2	0.061768	6	1.948	0.052
O14975	398	2.108	Up	K	Very long-chain acyl-CoA synthetase	SLC27A2	0.997927	0.000143508	56.681	IITYDLIK(0.998)YDVEK(0.002)DEPVRDENGYCVR	4	0.17818	1	1.356	0.644
P11766	113	1.645	Up	K	Alcohol dehydrogenase class-3	ADH5	1	0.00901021	75.738	TNLCQK(1)IR	3	-0.4807	2	1.244	0.756
P11766	107	1.74	Up	K	Alcohol dehydrogenase class-3	ADH5	1	0.00126607	81.625	FCLNPK(1)TNLCQK	3	-0.83245	2	1.27	0.73
P62906	118	1.576	Up	K	60S ribosomal protein L10a	RPL10A	1	1.14731e-07	143.83	YDAFLASESLIK(1)QIPR	3	0.52652	6	1.224	0.776
P58876	6	1.935	Up	K	Histone H2B type 1-D	HIST1H2BD	1	5.18369e-05	128.88	PEPTK(1)SAPAPK	3	0.052267	3	1.319	0.681
Q00839	9	5.706	Up	K	Heterogeneous nuclear ribonucleoprotein U	HNRNPU	1	0.000895633	110.79	SSSPVNVK(1)K	2	0.73311	2	1.702	0.298
Q00839	543	1.611	Up	K	Heterogeneous nuclear ribonucleoprotein U	HNRNPU	1	0.0492987	55.676	MMVAGFK(1)K	2	-4.2011	1	1.234	0.766
Q00839	670	1.765	Up	K	Heterogeneous nuclear ribonucleoprotein U	HNRNPU	0.997377	0.00569872	72.152	LLEQYK(0.997)EESK(0.003)K	3	0.30322	1	1.277	0.723
Q00839	186	1.657	Up	K	Heterogeneous nuclear ribonucleoprotein U	HNRNPU	1	0.000262304	62.589	EAAGK(1)SSGPTSLFAVTVAPPGAR	3	-0.62155	2	1.247	0.753
Q99942	93	1.762	Up	K	E3 ubiquitin-protein ligase RNF5	RNF5	1	5.59552e-05	102.52	LK(1)TPPRPQGQRPAPESR	3	0.37114	6	1.276	0.724
Q92621	1150	2.358	Up	K	Nuclear pore complex protein Nup205	NUP205	1	1.01884e-15	129.9	LLHLLLDDMPVK(1)PYSDGEGGIEDENR	4	-0.33421	4	1.404	0.596
P07900	419	1.632	Up	K	Heat shock protein HSP 90-alpha	HSP90AA1	1	5.2316e-06	114.69	K(1)CLELFTELAEDKENYKK	4	0.71616	2	1.24	0.76
Q9NZV1	978	2.126	Up	K	Cysteine-rich motor neuron 1 protein	CRIM1	1	2.94039e-06	118.48	TPTK(1)PSSLNNQLVSVDCK	3	-0.22814	2	1.36	0.64
P62244	88	2.378	Up	K	40S ribosomal protein S15a	RPS15A	1	9.62743e-13	170.95	FDVQLK(1)DLEK(1)WQNNLLPSR	3	0.058639	4	1.408	0.592
P40261	26	1.516	Up	K	Nicotinamide N-methyltransferase	NNMT	1	0.0411045	60.972	YYK(1)FGSR	2	-0.48653	1	1.205	0.795
P40261	23	1.537	Up	K	Nicotinamide N-methyltransferase	NNMT	1	0.045292	45.972	DYLEK(1)YYK	2	2.5925	1	1.212	0.788
O75976	1379	1.645	Up	K	Carboxypeptidase D	CPD	1	2.17817e-05	89.663	SLLSHEFQDETDTEEETLYSSK(1)H	4	-1.0502	1	1.244	0.756
P13010	565	1.742	Up	K	X-ray repair cross-complementing protein 5	XRCC5	1	4.7591e-15	162.42	DQVTAQEIFQDNHEDGPTAK(1)K	3	0.7669	4	1.271	0.729
Q16186	34	1.623	Up	K	Proteasomal ubiquitin receptor ADRM1	ADRM1	1	6.09832e-19	209.25	MSLK(1)GTTVTPDKR	2	0.05825	21	1.237	0.763

## Sheet: MS raw data-HCCLM3 IgG 
Accession	Description	Score	Coverage	# Proteins	# Unique Peptides	# Peptides	# PSMs	# AAs	MW [kDa]	calc. pI
Q7Z417	Nuclear fragile X mental retardation-interacting protein 2 OS=Homo sapiens GN=NUFIP2 PE=1 SV=1 - [NUFP2_HUMAN]	1697.19	19.28	1	11	11	40	695	76.0747	8.70459
	A2	Sequence	# PSMs	# Proteins	# Protein Groups	Protein Group Accessions	Modifications	ΔCn	IonScore	Exp Value	Charge	MH+ [Da]	ΔM [ppm]	RT [min]	# Missed Cleavages
	High	GADNDGSGSESGYTTPK	2	1	1	Q7Z417		0	95.41	2.30192e-10	2	1642.68	-3.41496	12.1081	0
	High	NLSSDEATNPISR	17	1	1	Q7Z417		0	93.47	2.63121e-09	2	1403.67	-1.46148	26.1005	0
	High	TGYGELNGNAGER	2	1	1	Q7Z417		0	88.08	6.30166e-09	2	1337.6	-3.659	19.9449	0
	High	VLNGNQQVVDTSLK	1	1	1	Q7Z417		0	85.45	1.83891e-08	2	1514.81	-3.33892	34.5131	0
	High	IMQQETSVPTLK	7	1	1	Q7Z417		0	71.72	6.19139e-07	2	1374.72	-4.26758	36.1305	0
	High	GcENLNIVQDK	4	1	1	Q7Z417	C2(Carbamidomethyl)	0	69.88	5.91109e-07	2	1289.61	-2.99736	28.4801	0
	High	YETGPGGTSR	1	1	1	Q7Z417		0	56.5	9.96231e-06	2	1024.47	-3.97443	9.949	0
	High	NDSWGSFDLR	2	1	1	Q7Z417		0	55.51	1.40595e-05	2	1196.54	4.38463	69.6514	0
	High	IITYNEAMDSPDQ	2	1	1	Q7Z417		0	51.72	2.11988e-05	2	1496.65	-3.59881	54.9671	0
	High	HTLQQHQETPK	1	1	1	Q7Z417		0	48.84	0.000127352	3	1346.68	-1.62033	8.21078	0
	High	EMESIWNLQK	1	1	1	Q7Z417		0	37.35	0.00149103	2	1277.62	-3.31033	68.1471	0
P52272	Heterogeneous nuclear ribonucleoprotein M OS=Homo sapiens GN=HNRNPM PE=1 SV=3 - [HNRPM_HUMAN]	1161.66	40.96	1	25	25	45	730	77.4643	8.70459
	A2	Sequence	# PSMs	# Proteins	# Protein Groups	Protein Group Accessions	Modifications	ΔCn	IonScore	Exp Value	Charge	MH+ [Da]	ΔM [ppm]	RT [min]	# Missed Cleavages
	High	MGAGMGFGLER	6	1	1	P52272		0	75.31	1.42804e-07	2	1125.52	-2.54726	56.8463	0
	High	GIGMGNIGPAGMGMEGIGFGINK	3	1	1	P52272		0	67.05	1.28207e-06	2	2178.05	1.45416	106.708	0
	High	MGANSLER	2	1	1	P52272		0	63.07	4.04403e-06	2	877.416	-3.77575	12.6962	0
	High	QGGGGGGGSVPGIER	1	1	1	P52272		0	62.44	3.67756e-06	2	1284.62	-3.79576	17.2825	0
	High	VGQTIER	1	1	1	P52272		0	60.98	1.46033e-05	2	802.44	-2.76599	9.98853	0
	High	LGGAGMER	1	1	1	P52272		0	57.12	1.37803e-05	2	790.385	-3.98952	10.816	0
	High	MVPAGMGAGLER	3	1	1	P52272		0	55.74	2.32017e-05	2	1188.59	-0.409059	38.2627	0
	High	AFITNIPFDVK	2	1	1	P52272		0	55.2	1.69117e-05	2	1264.7	4.62496	87.811	0
	High	EVFSMAGVVVR	2	1	1	P52272		0	53.89	2.8174e-05	2	1193.64	1.76529	72.6178	0
	High	MGLVMDR	4	1	1	P52272		0	52.75	4.11435e-05	2	821.398	-3.05366	29.2802	0
	High	MGANNLER	1	1	1	P52272		0	52.69	2.90666e-05	2	904.428	-2.89268	12.2207	0
	High	MEEESGAPGVPSGNGAPGPK	5	1	1	P52272		0	51.26	2.46896e-05	2	1867.84	-3.60655	26.8207	0
	High	EKVGEVTYVELLMDAEGK	1	1	1	P52272		0	50.62	5.37516e-05	3	2010.02	2.80042	101.954	1
	High	INEILSNALK	2	1	1	P52272		0	49.84	5.29139e-05	2	1114.65	-0.699485	52.808	0
	High	GNFGGSFAGSFGGAGGHAPGVAR	1	1	1	P52272		0	48.48	7.23719e-05	2	2034.96	2.83373	56.9842	0
	High	FESPEVAER	1	1	1	P52272		0	47.07	0.00012271	2	1063.5	-2.85123	21.7199	0
	High	VKEDPDGEHAR	1	1	1	P52272		0	46.42	0.000120858	3	1252.59	-2.20258	7.99303	1
	High	FGSGMNMGR	1	1	1	P52272		0	45.96	4.18296e-05	2	956.404	-3.62594	22.8067	0
	High	MGPLGLDHMASSIER	1	1	1	P52272		0	45.6	0.000206567	2	1613.78	4.53365	66.3645	0
	High	MGLSMER	1	1	1	P52272		0	44.39	0.00017104	2	823.379	-1.28177	24.9437	0
	High	ADILEDK	1	1	1	P52272		0	43.04	0.000441967	2	803.414	-0.270173	16.9227	0
	High	GcAVVEFK	1	1	1	P52272	C2(Carbamidomethyl)	0	39.79	0.000792405	2	909.448	-2.5256	25.0241	0
	High	MGPAMGPALGAGIER	1	1	1	P52272		0	39.28	0.000784913	2	1427.71	-3.88592	57.6904	0
	High	MGPGIDR	1	1	1	P52272		0	35.71	0.00139638	2	745.365	-1.79318	12.9778	0
	High	MGAGLGHGMDR	1	1	1	P52272		0	32.78	0.00139716	2	1101.49	0.512488	14.6176	0
Q8IWZ3	Ankyrin repeat and KH domain-containing protein 1 OS=Homo sapiens GN=ANKHD1 PE=1 SV=1 - [ANKH1_HUMAN]	1087.66	7.47	1	7	14	31	2542	269.291	5.73193
	A2	Sequence	# PSMs	# Proteins	# Protein Groups	Protein Group Accessions	Modifications	ΔCn	IonScore	Exp Value	Charge	MH+ [Da]	ΔM [ppm]	RT [min]	# Missed Cleavages
	High	TGLTPLMEAASGGYAEVGR	7	2	2	Q8IWZ3;O75179		0	113.47	3.50828e-11	2	1879.92	-1.37356	90.8743	0
	High	LEALLEAAGIGK	2	2	2	Q8IWZ3;O75179		0	90.47	4.7115e-09	2	1184.69	0.355488	75.3197	0
	High	LTSSVScALDEAAAALTR	1	2	2	Q8IWZ3;O75179	C7(Carbamidomethyl)	0	88.63	9.322e-09	2	1835.91	-3.41805	108.134	0
	High	TSQENSPALLGVQK	1	1	1	Q8IWZ3		0	73.55	3.15723e-07	2	1471.77	-0.890076	32.2021	0
	High	DTPLSLAcSGGR	2	2	2	Q8IWZ3;O75179	C8(Carbamidomethyl)	0	73.48	2.44566e-07	2	1233.59	-1.77658	41.72	0
	High	AEVVSLLLDR	1	1	1	Q8IWZ3		0	72.71	2.70577e-07	2	1114.65	-0.160882	78.3774	0
	High	TTSEIFLSSTAEGADLR	5	1	1	Q8IWZ3		0	68.55	1.02633e-06	2	1797.89	3.56564	71.722	0
	High	NTALTLAcFQGR	2	2	2	Q8IWZ3;O75179	C8(Carbamidomethyl)	0	65.59	2.49832e-06	2	1351.67	-4.69376	60.9511	0
	High	YAVQLINALIQDPAK	1	1	1	Q8IWZ3		0	63.08	1.72214e-06	2	1656.93	0.40043	104.271	0
	High	SLELIQGEPLNK	2	1	1	Q8IWZ3		0	62.88	2.44734e-06	2	1340.74	-2.06296	58.2401	0
	High	GANLEEVNDEGYTPLMEAAR	1	1	1	Q8IWZ3		0	52.92	1.93992e-05	2	2178.99	-1.7648	75.7834	0
	High	ESALTLAcYK	3	2	2	Q8IWZ3;O75179	C8(Carbamidomethyl)	0	42.26	0.000344689	2	1155.57	-4.76799	44.4961	0
	High	NASILLK	2	1	1	Q8IWZ3		0	41.68	0.000580719	2	758.475	-2.98127	23.5024	0
	High	FLLEAGADQEHK	1	2	2	Q8IWZ3;O75179		0	38.89	0.000813468	2	1357.67	-4.93858	30.0766	0
Q8N6T3	ADP-ribosylation factor GTPase-activating protein 1 OS=Homo sapiens GN=ARFGAP1 PE=1 SV=2 - [ARFG1_HUMAN]	1020.05	41.13	1	10	10	28	406	44.6403	5.65576
	A2	Sequence	# PSMs	# Proteins	# Protein Groups	Protein Group Accessions	Modifications	ΔCn	IonScore	Exp Value	Charge	MH+ [Da]	ΔM [ppm]	RT [min]	# Missed Cleavages
	High	SPSSDSWTcADTSTER	11	1	1	Q8N6T3	C9(Carbamidomethyl)	0	89.56	6.63974e-10	2	1786.72	0.567924	27.3018	0
	High	YVGFGNTPPPQK	5	1	1	Q8N6T3		0	77.91	1.6019e-07	2	1304.66	-2.17776	28.031	0
	High	AFEDWLNDDLGSYQGAQGNR	2	1	1	Q8N6T3		0	71.41	2.05989e-07	2	2256	3.28982	96.9574	0
	High	VSGQPQSVTASSDK	1	1	1	Q8N6T3		0	68.53	8.34674e-07	2	1390.67	-5.15408	10.2919	0
	High	SSDSWEVWGSASTNR	1	1	1	Q8N6T3		0	52.14	1.95501e-05	2	1668.74	6.05947	66.3947	0
	High	FREFLESQEDYDPcWSLQEK	2	1	1	Q8N6T3	C14(Carbamidomethyl)	0	48.7	3.23751e-05	3	2606.16	4.58659	87.8422	1
	High	DKVVALAEGR	1	1	1	Q8N6T3		0	44.52	0.000303738	2	1057.6	-1.80519	19.1888	1
	High	EFLESQEDYDPcWSLQEK	3	1	1	Q8N6T3	C12(Carbamidomethyl)	0	42.91	4.86098e-05	2	2302.98	-0.826666	86.6221	0
	High	EWSLESSPAQNWTPPQPR	1	1	1	Q8N6T3		0	34.01	0.00170792	2	2109.99	-2.0165	79.516	0
	High	AEGPLDSPSEGHSYQNSGLDHFQNSNIDQSFWETFGSAEPTK	1	1	1	Q8N6T3		0	32.17	0.000333705	4	4611.04	3.07863	101.916	0
P51114	Fragile X mental retardation syndrome-related protein 1 OS=Homo sapiens GN=FXR1 PE=1 SV=3 - [FXR1_HUMAN]	993.567	23.35	1	12	14	34	621	69.6779	6.15088
	A2	Sequence	# PSMs	# Proteins	# Protein Groups	Protein Group Accessions	Modifications	ΔCn	IonScore	Exp Value	Charge	MH+ [Da]	ΔM [ppm]	RT [min]	# Missed Cleavages
	High	KDELSDWSLAGEDDR	1	1	1	P51114		0	95.29	2.05582e-09	2	1735.78	-0.853224	58.1193	1
	High	EISEGDEVEVYSR	15	1	1	P51114		0	83.8	1.83423e-08	2	1511.68	-3.86849	40.0624	0
	High	GFLEFVEDFIQVPR	3	1	1	P51114		0	79.34	9.02198e-08	3	1695.88	1.37256	114.684	0
	High	VPGVTAIELDEDTGTFR	1	1	1	P51114		0	78.14	1.09725e-07	2	1819.91	3.32234	78.4933	0
	High	KVPGVTAIELDEDTGTFR	3	1	1	P51114		0	57.85	1.04177e-05	3	1948.01	2.90934	68.9642	1
	High	GPNYTSGYGTNSELSNPSETESER	2	1	1	P51114		0	55.45	3.27867e-06	2	2576.09	-2.99501	44.9259	0
	High	IYGESADAVKK	1	1	1	P51114		0	45.86	0.000211426	2	1180.62	-4.12234	11.5012	1
	High	VNILSDMHLR	1	1	1	P51114		0	44.19	0.000257219	2	1197.64	-4.58213	62.3543	0
	High	GSNGAFYK	1	3	3	Q06787;P51114;P51116		0	42.44	0.00024232	2	843.398	-1.86683	12.393	0
	High	IYGESADAVK	2	1	1	P51114		0	41.48	0.00051563	2	1052.52	-5.43657	17.2282	0
	High	cTVDVPEDLR	1	1	1	P51114	C1(Carbamidomethyl)	0	41.4	0.000383951	2	1203.56	-2.97859	41.488	0
	High	ANDQEPcGWWLAK	1	1	1	P51114	C7(Carbamidomethyl)	0	39.65	0.000254723	2	1574.7	-3.16511	71.2511	0
	High	VIQEIVDK	1	2	2	P51114;P51116		0	38.75	0.000840119	2	943.542	-3.72564	21.653	0
	High	RGPNYTSGYGTNSELSNPSETESER	1	1	1	P51114		0	34.14	0.000636039	3	2732.19	-4.63272	34.274	1
Q14157	Ubiquitin-associated protein 2-like OS=Homo sapiens GN=UBAP2L PE=1 SV=2 - [UBP2L_HUMAN]	978.388	18.22	1	13	13	36	1087	114.465	7.10791
	A2	Sequence	# PSMs	# Proteins	# Protein Groups	Protein Group Accessions	Modifications	ΔCn	IonScore	Exp Value	Charge	MH+ [Da]	ΔM [ppm]	RT [min]	# Missed Cleavages
	High	NPSDSAVHSPFTK	5	1	1	Q14157		0	73.37	2.78455e-07	2	1386.66	-1.51729	22.6348	0
	High	LAQMISDHNDADFEEK	10	1	1	Q14157		0	65.57	7.21063e-07	2	1862.82	0.626343	38.2821	0
	High	NGFSSVQATQLQTTQSVEGATGSAVK	2	1	1	Q14157		0	63.1	2.22849e-06	2	2596.3	4.77202	66.1518	0
	High	GGSTTGSQFLEQFK	1	1	1	Q14157		0	61.72	4.3407e-06	2	1486.71	-1.79193	65.5957	0
	High	YPSSISSSPQK	1	1	1	Q14157		0	58.3	1.30901e-05	2	1180.58	-3.06049	15.5254	0
	High	IDLAVLLGK	5	1	1	Q14157		0	55.25	5.67223e-06	2	941.608	4.88662	93.9197	0
	High	QRPQATAEQIR	2	1	1	Q14157		0	47.32	0.00012604	3	1297.69	-4.16525	10.2787	1
	High	SPAVATSTAAPPPPSSPLPSK	3	1	1	Q14157		0	45.8	0.000139404	2	1960.03	-5.69782	38.085	0
	High	NQDEcVIALHDcNGDVNR	2	1	1	Q14157	C5(Carbamidomethyl); C12(Carbamidomethyl)	0	44.65	5.82705e-05	2	2128.91	-3.87442	33.7484	0
	High	GFGDVGEAK	2	1	1	Q14157		0	42.55	0.000497534	2	879.419	-2.32377	17.4888	0
	High	AINVLLEGNPDTHSWEMVGK	1	1	1	Q14157		0	41.32	0.000431674	3	2210.1	5.00687	86.2691	0
	High	GNWEQPQNQNQTQHK	1	1	1	Q14157		0	38.84	0.000496345	2	1836.83	-3.48054	10.9289	0
	High	DGSLASNPYSGDLTK	1	1	1	Q14157		0	37.91	0.000995119	2	1524.71	-4.16472	47.1514	0
P08729	Keratin, type II cytoskeletal 7 OS=Homo sapiens GN=KRT7 PE=1 SV=4 - [K2C7_HUMAN]	959.749	36.46	1	15	18	37	469	51.3734	5.49072
	A2	Sequence	# PSMs	# Proteins	# Protein Groups	Protein Group Accessions	Modifications	ΔCn	IonScore	Exp Value	Charge	MH+ [Da]	ΔM [ppm]	RT [min]	# Missed Cleavages
	High	LEAAIAEAEER	6	1	1	P08729		0	76.9	1.8784e-07	2	1201.61	0.527362	31.5293	0
	High	GQLEALQVDGGR	3	1	1	P08729		0	74.25	2.5369e-07	2	1242.64	-2.09266	35.6886	0
	High	LPDIFEAQIAGLR	3	1	1	P08729		0	72.66	3.25201e-07	2	1442.8	1.65553	104.519	0
	High	VDALNDEINFLR	3	1	1	P08729		0	63.21	4.75142e-06	2	1418.73	0.2393	85.7525	0
	High	AKQEELEAALQR	2	1	1	P08729		0	61.75	5.54725e-06	2	1385.74	-1.27834	29.3099	1
	High	TAAENEFVVLKK	1	1	1	P08729		0.0984	55.12	1.90718e-05	2	1348.75	-1.20875	33.1553	1
	High	SLDLDGIIAEVK	1	1	1	P08729		0	54.4	2.75939e-05	2	1272.7	-1.91346	101.611	0
	High	VRQEESEQIK	1	1	1	P08729		0	50.04	8.37253e-05	3	1245.64	-3.5324	9.19809	1
	High	SMQDVVEDFK	3	1	1	P08729		0	49.81	4.23112e-05	2	1197.54	-2.32728	63.3317	0
	High	AKLEAAIAEAEER	1	1	1	P08729		0	46.69	0.000172503	2	1400.74	0.96819	43.0954	1
	High	LQAEIDNIK	2	1	1	P08729		0	43.68	0.000317126	2	1043.57	-2.25468	28.4995	0
	High	LLEGEESR	1	3	3	P05787;P08670;P08729		0	43.46	0.000489136	2	932.464	-4.48418	12.1807	0
	High	FASFIDK	3	4	4	P35908;P13647;P05787;P08729		0	42.82	0.000457097	2	827.432	2.77264	37.5871	0
	High	PGGLGSSSLYGLGASR	1	1	1	P08729		0	40.66	0.000695801	2	1478.75	-3.41027	58.4084	0
	High	FLEQQNK	1	8	5	P13647;P05787;O43790;P08670;P08729		0	40.44	0.00123348	2	906.465	-2.94849	11.2158	0
	High	TAAENEFVVLK	1	1	1	P08729		0.0488	39.19	0.00115081	2	1220.65	-2.53623	51.4747	0
	High	LDADPSLQR	1	1	1	P08729		0	38.61	0.000902072	2	1014.52	-3.33882	20.5374	0
	High	DVDAAYMSK	3	1	1	P08729		0	36.14	0.000620212	2	999.442	-3.281	21.3339	0
P04264	Keratin, type II cytoskeletal 1 OS=Homo sapiens GN=KRT1 PE=1 SV=6 - [K2C1_HUMAN]	955.624	20.65	1	12	13	28	644	65.999	8.11865
	A2	Sequence	# PSMs	# Proteins	# Protein Groups	Protein Group Accessions	Modifications	ΔCn	IonScore	Exp Value	Charge	MH+ [Da]	ΔM [ppm]	RT [min]	# Missed Cleavages
	High	QISNLQQSISDAEQR	1	1	1	P04264		0	79.5	8.75174e-08	2	1716.85	-2.94981	52.4087	0
	High	FLEQQNQVLQTK	3	2	2	P35908;P04264		0	78.99	1.12934e-07	2	1475.79	0.416707	37.6097	0
	High	SLNNQFASFIDK	1	1	1	P04264		0	77.44	1.72188e-07	2	1383.69	-1.32771	76.1179	0
	High	SGGGFSSGSAGIINYQR	1	1	1	P04264		0	74.23	2.49198e-07	2	1657.79	-4.1519	49.87	0
	High	YEELQITAGR	4	1	1	P04264		0	70.23	9.10482e-07	2	1179.6	-2.86352	40.8885	0
	High	LNDLEDALQQAK	2	1	1	P04264		0	69.33	9.8012e-07	2	1357.69	-4.13802	59.4423	0
	High	SKAEAESLYQSK	5	1	1	P04264		0	64.8	2.23514e-06	2	1340.66	-4.13035	12.3496	1
	High	AEAESLYQSK	3	1	1	P04264		0	61.11	5.26634e-06	2	1125.54	-3.03441	16.4838	0
	High	TNAENEFVTIKK	1	1	1	P04264		0	57.49	1.37243e-05	2	1393.73	-2.54426	24.9511	1
	High	TNAENEFVTIK	2	1	1	P04264		0	56.49	1.91852e-05	2	1265.64	-0.294619	40.7457	0
	High	DYQELMNTK	2	1	1	P04264		0	55.08	1.67646e-05	2	1141.52	-2.87374	38.0456	0
	High	SLDLDSIIAEVK	1	1	1	P04264		0	52.13	5.11313e-05	2	1302.71	-4.07215	106.494	0
	High	NMQDMVEDYR	1	1	1	P04264		0	51.1	1.00912e-05	2	1300.53	-0.375921	52.452	0
	High	NMQDmVEDYR	1	1	1	P04264	M5(Oxidation)	0	34.28	0.0002986	2	1316.52	-3.74121	34.841	0
P11940	Polyadenylate-binding protein 1 OS=Homo sapiens GN=PABPC1 PE=1 SV=2 - [PABP1_HUMAN]	935.38	29.72	1	13	18	34	636	70.6259	9.49561
	A2	Sequence	# PSMs	# Proteins	# Protein Groups	Protein Group Accessions	Modifications	ΔCn	IonScore	Exp Value	Charge	MH+ [Da]	ΔM [ppm]	RT [min]	# Missed Cleavages
	High	ALYDTFSAFGNILScK	1	2	2	P11940;Q13310	C15(Carbamidomethyl)	0	87.69	1.02981e-08	2	1806.88	2.66315	109.913	0
	High	PLYVALAQR	4	2	2	P11940;Q13310		0	76.31	1.12264e-07	2	1030.6	-3.685	45.2249	0
	High	SGVGNIFIK	2	1	1	P11940		0	74.47	1.73277e-07	2	934.537	1.43772	50.0091	0
	High	VDEAVAVLQAHQAK	3	1	1	P11940		0	58.95	6.87692e-06	2	1478.79	-6.06054	32.4311	0
	High	KEFSPFGTITSAK	1	1	1	P11940		0	56.84	1.38699e-05	2	1412.74	-0.488903	50.5831	1
	High	NFGEDMDDER	2	1	1	P11940		0	56.16	7.72894e-07	2	1227.45	-3.40716	25.0695	0
	High	GYGFVHFETQEAAER	6	1	1	P11940		0	53.64	1.77331e-05	2	1740.79	-4.01788	54.3103	0
	High	VANTSTQTMGPR	1	1	1	P11940		0	52.65	4.37317e-05	2	1262.61	-1.2006	11.2636	0
	High	GFGFVSFER	1	1	1	P11940		0	52.32	4.51326e-05	2	1045.51	-3.76671	76.4484	0
	High	ALDTMNFDVIK	1	2	2	P11940;Q13310		0	50.39	7.17579e-05	2	1266.64	0.689516	76.0056	0
	High	SKVDEAVAVLQAHQAK	1	1	1	P11940		0	49.63	5.33576e-05	3	1693.92	-4.17344	44.3488	1
	High	NLDDGIDDER	1	1	1	P11940		0	48.77	1.46013e-05	2	1161.5	-0.755177	23.677	0
	High	FGPALSVK	1	1	1	P11940		0	48.57	0.000100772	2	818.477	-0.090357	34.459	0
	High	MNGMLLNDR	1	2	2	P11940;Q13310		0	45.38	0.000182533	2	1063.5	-3.80131	34.9304	0
	High	QAHLTNQYMQR	2	1	1	P11940		0	44.34	0.0002853	2	1389.66	-5.00284	16.1331	0
	High	IVATKPLYVALAQR	4	1	1	P11940		0	40.24	5.2043e-05	3	1542.93	-2.81615	55.3445	1
	High	FSPAGPILSIR	1	1	1	P11940		0	39.2	0.000522985	2	1157.67	-1.80042	71.4936	0
	High	GFGFVcFSSPEEATK	1	2	2	P11940;Q13310	C6(Carbamidomethyl)	0	36.16	0.000738414	2	1662.74	-5.01721	79.7306	0
P08670	Vimentin OS=Homo sapiens GN=VIM PE=1 SV=4 - [VIME_HUMAN]	899.405	33.48	1	13	15	30	466	53.6191	5.12256
	A2	Sequence	# PSMs	# Proteins	# Protein Groups	Protein Group Accessions	Modifications	ΔCn	IonScore	Exp Value	Charge	MH+ [Da]	ΔM [ppm]	RT [min]	# Missed Cleavages
	High	LLQDSVDFSLADAINTEFK	1	1	1	P08670		0	90.92	4.12639e-09	2	2126.06	-4.39099	110.152	0
	High	KVESLQEEIAFLK	4	1	1	P08670		0	82.63	2.51049e-08	2	1533.85	-0.0122433	75.7076	1
	High	QDVDNASLAR	2	1	1	P08670		0	74.7	2.23637e-07	2	1088.53	-3.59099	13.5245	0
	High	FADLSEAANR	4	1	1	P08670		0	64.93	3.14939e-06	2	1093.52	-2.50344	28.3819	0
	High	ILLAELEQLK	4	1	1	P08670		0	64.37	6.39791e-07	2	1169.72	4.04909	87.2147	0
	High	NLQEAEEWYK	2	1	1	P08670		0	61.21	4.04906e-06	2	1309.6	-3.96739	52.8448	0
	High	SSVPGVR	1	1	1	P08670		0	55.56	2.8909e-05	2	701.393	-2.10378	11.1041	0
	High	EEAENTLQSFR	2	1	1	P08670		0	55.37	1.68433e-05	2	1323.61	-4.6037	37.7868	0
	High	LGDLYEEEMR	2	1	1	P08670		0	49.43	4.78905e-05	2	1254.56	-2.10478	48.4955	0
	High	QVQSLTcEVDALK	1	1	1	P08670	C7(Carbamidomethyl)	0	47.12	0.000164975	2	1490.75	-4.16581	58.7597	0
	High	MFGGPGTASR	2	1	1	P08670		0	45.38	0.000181084	2	980.46	-2.4183	18.6598	0
	High	LLEGEESR	1	3	3	P05787;P08670;P08729		0	43.46	0.000489136	2	932.464	-4.48418	12.1807	0
	High	VELQELNDR	1	1	1	P08670		0	43.21	0.000353372	2	1115.57	0.290709	31.5193	0
	High	FLEQQNK	1	8	5	P13647;P05787;O43790;P08670;P08729		0	40.44	0.00123348	2	906.465	-2.94849	11.2158	0
	High	LQDEIQNMK	2	1	1	P08670		0	40.34	0.000846099	2	1118.55	-1.98076	24.4134	0
O75179	Ankyrin repeat domain-containing protein 17 OS=Homo sapiens GN=ANKRD17 PE=1 SV=3 - [ANR17_HUMAN]	863.493	5.03	1	3	10	24	2603	274.088	6.52197
	A2	Sequence	# PSMs	# Proteins	# Protein Groups	Protein Group Accessions	Modifications	ΔCn	IonScore	Exp Value	Charge	MH+ [Da]	ΔM [ppm]	RT [min]	# Missed Cleavages
	High	TGLTPLMEAASGGYAEVGR	7	2	2	Q8IWZ3;O75179		0	113.47	3.50828e-11	2	1879.92	-1.37356	90.8743	0
	High	LEALLEAAGIGK	2	2	2	Q8IWZ3;O75179		0	90.47	4.7115e-09	2	1184.69	0.355488	75.3197	0
	High	LTSSVScALDEAAAALTR	1	2	2	Q8IWZ3;O75179	C7(Carbamidomethyl)	0	88.63	9.322e-09	2	1835.91	-3.41805	108.134	0
	High	SLAEAcSEGDVNAVR	1	1	1	O75179	C6(Carbamidomethyl)	0	78.44	5.65714e-08	2	1577.72	-2.57582	29.3375	0
	High	DTPLSLAcSGGR	2	2	2	Q8IWZ3;O75179	C8(Carbamidomethyl)	0	73.48	2.44566e-07	2	1233.59	-1.77658	41.72	0
	High	NTALTLAcFQGR	2	2	2	Q8IWZ3;O75179	C8(Carbamidomethyl)	0	65.59	2.49832e-06	2	1351.67	-4.69376	60.9511	0
	High	NASILLEELDLEK	4	1	1	O75179		0	61.12	5.3315e-06	2	1486.8	-1.65345	101.138	0
	High	ESALTLAcYK	3	2	2	Q8IWZ3;O75179	C8(Carbamidomethyl)	0	42.26	0.000344689	2	1155.57	-4.76799	44.4961	0
	High	FLLEAGADQEHK	1	2	2	Q8IWZ3;O75179		0	38.89	0.000813468	2	1357.67	-4.93858	30.0766	0
	High	KLEEIEAK	1	1	1	O75179		0	36.67	0.00132396	2	959.541	-0.0231537	10.7866	1
Q14789	Golgin subfamily B member 1 OS=Homo sapiens GN=GOLGB1 PE=1 SV=2 - [GOGB1_HUMAN]	827.816	7.49	1	19	19	29	3259	375.79	4.99561
	A2	Sequence	# PSMs	# Proteins	# Protein Groups	Protein Group Accessions	Modifications	ΔCn	IonScore	Exp Value	Charge	MH+ [Da]	ΔM [ppm]	RT [min]	# Missed Cleavages
	High	AQTEVQLQQK	1	1	1	Q14789		0	80.97	7.35848e-08	2	1172.62	-3.34875	12.3972	0
	High	LAAEEQFQALVK	2	1	1	Q14789		0	79.5	8.07853e-08	2	1346.73	-2.27971	70.0659	0
	High	IQTEIIEQEDLIK	2	1	1	Q14789		0	73.86	2.4669e-07	2	1571.86	2.61336	69.2898	0
	High	VAAENALSVAEEQIR	2	1	1	Q14789		0	72.76	3.81358e-07	2	1599.84	2.22933	73.1157	0
	High	SSTEEEMEIEK	1	1	1	Q14789		0	60.86	1.72274e-06	2	1311.56	-2.83944	22.275	0
	High	SLADVESQVSAQNK	2	1	1	Q14789		0	59.11	9.26717e-06	2	1475.74	3.39068	41.2231	0
	High	IVGDYQQLEER	4	1	1	Q14789		0	57.95	1.57118e-05	2	1349.66	-3.63116	38.7247	0
	High	DSLSEEVQDLK	2	1	1	Q14789		0	57.43	1.49092e-05	2	1262.6	-5.20473	60.102	0
	High	IAESTEWQEK	2	1	1	Q14789		0	52.73	4.00001e-05	2	1220.58	-3.01506	22.2215	0
	High	VcDTLQGENK	1	1	1	Q14789	C2(Carbamidomethyl)	0	51.56	3.28169e-05	2	1163.53	-5.2327	11.3871	0
	High	TGQELQSAcDALK	2	1	1	Q14789	C9(Carbamidomethyl)	0	49.8	5.54978e-05	2	1420.67	-4.54109	34.5583	0
	High	TNQIDLLQAEISENQAIIQK	1	1	1	Q14789		0	48.02	5.6794e-05	2	2269.21	0.711449	102.705	0
	High	LITSNTDASDGDSVALVK	1	1	1	Q14789		0	46.26	0.000173895	2	1805.91	-3.12818	47.1776	0
	High	DHANEELDELKR	1	1	1	Q14789		0	43.98	0.000371949	3	1468.7	-2.65925	20.7218	1
	High	ALEFVQTESQK	1	1	1	Q14789		0	41.23	0.00066672	2	1279.65	-4.88983	34.5342	0
	High	DHLWNELEK	1	1	1	Q14789		0	40.16	0.000631308	2	1183.57	-1.23338	47.4999	0
	High	KLEEHEESLVGR	1	1	1	Q14789		0	37.99	0.00123112	3	1425.73	-2.4979	15.8552	1
	High	ILELEEENDR	1	1	1	Q14789		0	36.09	0.0013655	2	1259.61	-3.25808	35.0135	0
	High	LPSTDQQEScSSTPGLEEPLFK	1	1	1	Q14789	C10(Carbamidomethyl)	0	36.02	0.00110015	2	2450.15	5.55652	72.6439	0
P05787	Keratin, type II cytoskeletal 8 OS=Homo sapiens GN=KRT8 PE=1 SV=7 - [K2C8_HUMAN]	796.845	33.13	1	13	16	28	483	53.6711	5.59229
	A2	Sequence	# PSMs	# Proteins	# Protein Groups	Protein Group Accessions	Modifications	ΔCn	IonScore	Exp Value	Charge	MH+ [Da]	ΔM [ppm]	RT [min]	# Missed Cleavages
	High	LEAELGNMQGLVEDFK	2	1	1	P05787		0	97.64	1.27418e-09	2	1792.88	0.015845	104.467	0
	High	SLDMDSIIAEVK	2	1	1	P05787		0	73.76	3.63929e-07	2	1320.68	3.00105	94.9102	0
	High	LSELEAALQR	1	1	1	P05787		0	72.84	5.32996e-07	2	1129.62	-1.36754	51.9345	0
	High	ASLEAAIADAEQR	2	1	1	P05787		0	71.45	5.62173e-07	2	1344.67	-1.26993	63.7654	0
	High	QLYEEEIR	6	1	1	P05787		0	63.48	4.55477e-06	2	1079.53	-3.17591	29.6844	0
	High	YEELQSLAGK	1	1	1	P05787		0	62.86	4.99491e-06	2	1137.57	-4.40877	36.0273	0
	High	AQYEDIANR	1	1	1	P05787		0	62.58	2.95361e-06	2	1079.51	-3.28581	18.6213	0
	High	TEMENEFVLIK	2	1	1	P05787		0	58.39	1.20248e-05	2	1352.68	3.41597	74.3927	0
	High	LEGLTDEINFLR	1	1	1	P05787		0	50.96	7.65603e-05	2	1419.75	-1.40454	98.1515	0
	High	VGSSNFR	1	1	1	P05787		0	47.58	0.000104749	2	766.382	-3.10258	10.4544	0
	High	LLEGEESR	1	3	3	P05787;P08670;P08729		0	43.46	0.000489136	2	932.464	-4.48418	12.1807	0
	High	FASFIDK	3	4	4	P35908;P13647;P05787;P08729		0	42.82	0.000457097	2	827.432	2.77264	37.5871	0
	High	LVSESSDVLPK	1	1	1	P05787		0	42.2	0.000605572	2	1173.63	-2.63887	31.8653	0
	High	DVDEAYMNK	1	1	1	P05787		0	41.07	0.000218856	2	1084.46	2.35842	20.7752	0
	High	FLEQQNK	1	8	5	P13647;P05787;O43790;P08670;P08729		0	40.44	0.00123348	2	906.465	-2.94849	11.2158	0
	High	TKTEISEMNR	2	1	1	P05787		0	39.62	0.000742179	2	1208.59	-4.22519	11.0491	1
P13645	Keratin, type I cytoskeletal 10 OS=Homo sapiens GN=KRT10 PE=1 SV=6 - [K1C10_HUMAN]	671.954	15.75	1	7	7	20	584	58.7917	5.21143
	A2	Sequence	# PSMs	# Proteins	# Protein Groups	Protein Group Accessions	Modifications	ΔCn	IonScore	Exp Value	Charge	MH+ [Da]	ΔM [ppm]	RT [min]	# Missed Cleavages
	High	GSLGGGFSSGGFSGGSFSR	2	1	1	P13645		0	89.35	4.76194e-09	2	1707.78	2.66411	66.5636	0
	High	SQYEQLAEQNR	3	1	1	P13645		0	70.18	6.09219e-07	2	1365.64	-0.745466	22.518	0
	High	QSLEASLAETEGR	1	1	1	P13645		0	67.34	1.14391e-06	2	1390.68	-1.38682	48.4922	0
	High	SLLEGEGSSGGGGR	10	1	1	P13645		0	60.48	5.14835e-06	2	1262.59	-4.73406	18.2909	0
	High	ELTTEIDNNIEQISSYK	2	1	1	P13645		0	56.92	1.32103e-05	2	1996.98	3.59329	90.2772	0
	High	SQYEQLAEQNRK	1	1	1	P13645		0	46.64	0.000195093	2	1493.73	-4.27683	15.2799	1
	High	AETEcQNTEYQQLLDIK	1	1	1	P13645	C5(Carbamidomethyl)	0	45.75	0.000125054	2	2082.96	-0.822355	75.3452	0
P51116	Fragile X mental retardation syndrome-related protein 2 OS=Homo sapiens GN=FXR2 PE=1 SV=2 - [FXR2_HUMAN]	670.843	25.41	1	12	14	26	673	74.178	6.22705
	A2	Sequence	# PSMs	# Proteins	# Protein Groups	Protein Group Accessions	Modifications	ΔCn	IonScore	Exp Value	Charge	MH+ [Da]	ΔM [ppm]	RT [min]	# Missed Cleavages
	High	YNSSSISSVLK	10	1	1	P51116		0	76.77	1.44109e-07	2	1184.61	-1.95877	44.4291	0
	High	ANEQEPcGWWLAR	2	1	1	P51116	C7(Carbamidomethyl)	0	69.75	4.60775e-07	2	1616.73	2.9133	74.85	0
	High	AGYSTDESSSSSLHATR	2	1	1	P51116		0	61.11	2.12977e-06	2	1755.77	-3.37115	13.8996	0
	High	EITEGDEVEVYSR	1	1	1	P51116		0	61	3.61419e-06	2	1525.7	-2.80921	41.5464	0
	High	LRPVNPNPLATK	1	1	1	P51116		0	49.79	1.88918e-05	2	1319.77	-4.25072	24.7934	1
	High	VTMAVPEDLR	1	1	1	P51116		0	49.57	9.27426e-05	2	1130.58	-3.38368	49.4972	0
	High	TGGPAYGPSSDVSTASETESEK	2	1	1	P51116		0	47.76	3.85237e-05	2	2156.95	-0.499345	29.8554	0
	High	TKPSEDSLSGQK	1	1	1	P51116		0	47.15	0.00015613	2	1276.63	-3.25437	9.57783	1
	High	SYLEFSEDSVQVPR	1	1	1	P51116		0	43.14	0.000269335	2	1655.79	-2.14765	75.0334	0
	High	GSNGAFYK	1	3	3	Q06787;P51114;P51116		0	42.44	0.00024232	2	843.398	-1.86683	12.393	0
	High	ASLLGDMHFR	1	1	1	P51116		0	42.04	0.000684564	2	1146.57	-0.164033	59.39	0
	High	IYGETPEAcR	1	1	1	P51116	C9(Carbamidomethyl)	0	40.69	0.000290054	2	1195.54	-4.54282	17.2246	0
	High	QPVTVADYISR	1	1	1	P51116		0	40.32	0.000840715	2	1248.66	-0.154283	51.815	0
	High	VIQEIVDK	1	2	2	P51114;P51116		0	38.75	0.000840119	2	943.542	-3.72564	21.653	0
Q8WWM7	Ataxin-2-like protein OS=Homo sapiens GN=ATXN2L PE=1 SV=2 - [ATX2L_HUMAN]	551.017	14.6	1	11	11	24	1075	113.304	8.5874
	A2	Sequence	# PSMs	# Proteins	# Protein Groups	Protein Group Accessions	Modifications	ΔCn	IonScore	Exp Value	Charge	MH+ [Da]	ΔM [ppm]	RT [min]	# Missed Cleavages
	High	DKFTDSAIAMNSK	3	1	1	Q8WWM7		0	65.29	1.56775e-06	2	1427.68	-3.72006	31.3406	1
	High	GEDKDEGPVAEQVK	4	1	1	Q8WWM7		0	58.23	9.31948e-06	2	1500.71	-3.60058	11.5909	1
	High	FELAVDAVHR	2	1	1	Q8WWM7		0	57.6	1.24253e-05	2	1156.61	-2.09509	45.871	0
	High	TTYDSSLSSYTVPLEK	1	1	1	Q8WWM7		0	51.1	4.89036e-05	2	1790.87	0.921367	69.2038	0
	High	GPHHLDNSSPGPGSEAR	2	1	1	Q8WWM7		0	48.92	4.61639e-05	2	1714.78	-2.50853	9.70096	0
	High	FNEENYGVK	4	1	1	Q8WWM7		0	48.43	4.95244e-05	2	1099.51	-0.4082	23.1638	0
	High	AEGLQVGQDAR	2	1	1	Q8WWM7		0	48.25	0.000104736	2	1143.57	-3.60862	17.1124	0
	High	EKEVDGLLTSEPMGSPVSSK	1	1	1	Q8WWM7		0	42.57	0.000326477	3	2090.03	-2.81813	55.1675	1
	High	VPGLQNEQK	2	1	1	Q8WWM7		0	41.63	0.000412241	2	1012.54	-0.189142	12.6979	0
	High	TLEPQELAR	2	1	1	Q8WWM7		0	39.26	0.000865611	2	1056.57	-2.69926	28.2758	0
	High	GAEGILAPQPPPPQQHQERPGAAAIGSAR	1	1	1	Q8WWM7		0	38.13	0.000484519	4	2901.51	0.331048	38.5681	1
P67809	Nuclease-sensitive element-binding protein 1 OS=Homo sapiens GN=YBX1 PE=1 SV=3 - [YBOX1_HUMAN]	550.343	44.14	1	6	8	18	324	35.9027	9.87646
	A2	Sequence	# PSMs	# Proteins	# Protein Groups	Protein Group Accessions	Modifications	ΔCn	IonScore	Exp Value	Charge	MH+ [Da]	ΔM [ppm]	RT [min]	# Missed Cleavages
	High	GAEAANVTGPGGVPVQGSK	1	1	1	P67809		0	93.88	3.17177e-09	2	1695.86	-1.22653	24.6568	0
	High	NYQQNYQNSESGEK	2	1	1	P67809		0	79.53	2.06144e-08	2	1688.71	-3.21854	11.7777	0
	High	NEGSESAPEGQAQQR	1	1	1	P67809		0	77.39	3.92138e-08	2	1587.69	-4.18512	9.78443	0
	High	SVGDGETVEFDVVEGEK	3	2	2	P67809;P16989		0	74.07	1.91954e-07	2	1795.83	3.17168	66.1573	0
	High	AADPPAENSSAPEAEQGGAE	3	1	1	P67809		0	62.62	7.11121e-07	2	1897.8	-3.40707	19.817	0
	High	EDGNEEDKENQGDETQGQQPPQR	1	1	1	P67809		0	48.42	1.22298e-05	3	2628.1	-2.86081	10.1716	1
	High	NGYGFINR	2	2	2	P67809;P16989		0	48.33	8.887e-05	2	940.466	2.50689	32.5805	0
	High	RPQYSNPPVQGEVMEGADNQGAGEQGR	5	1	1	P67809		0	47.2	4.57311e-05	3	2871.29	-4.97797	35.2129	1
P02768	Serum albumin OS=Homo sapiens GN=ALB PE=1 SV=2 - [ALBU_HUMAN]	534.841	6.08	1	5	5	22	609	69.3215	6.27783
	A2	Sequence	# PSMs	# Proteins	# Protein Groups	Protein Group Accessions	Modifications	ΔCn	IonScore	Exp Value	Charge	MH+ [Da]	ΔM [ppm]	RT [min]	# Missed Cleavages
	High	KVPQVSTPTLVEVSR	4	1	1	P02768		0	109.23	2.32828e-11	2	1639.94	-1.43231	47.4418	1
	High	ccTESLVNR	14	1	1	P02768	C1(Carbamidomethyl); C2(Carbamidomethyl)	0	50.91	2.67617e-05	2	1138.49	-3.56191	15.6487	0
	High	LVTDLTK	2	1	1	P02768		0	43.77	0.000371487	2	789.469	-3.73002	20.1973	0
	High	VPQVSTPTLVEVSR	1	1	1	P02768		0	39.43	0.000621436	2	1511.84	0.948894	57.1257	0
	High	cASLQK	1	1	1	P02768	C1(Carbamidomethyl)	0	37.79	0.00138063	2	706.354	-1.45917	8.33834	0
Q9NP61	ADP-ribosylation factor GTPase-activating protein 3 OS=Homo sapiens GN=ARFGAP3 PE=1 SV=1 - [ARFG3_HUMAN]	523.27	10.47	1	4	4	16	516	56.893	7.35693
	A2	Sequence	# PSMs	# Proteins	# Protein Groups	Protein Group Accessions	Modifications	ΔCn	IonScore	Exp Value	Charge	MH+ [Da]	ΔM [ppm]	RT [min]	# Missed Cleavages
	High	SSSFSSWDDSSDSYWK	4	1	1	Q9NP61		0	70.63	2.76134e-08	2	1870.73	-3.32752	76.7273	0
	High	LANTcFNEIEK	7	1	1	Q9NP61	C5(Carbamidomethyl)	0	70.39	6.4445e-07	2	1338.63	-3.62778	36.6743	0
	High	AISSDMYFGR	3	1	1	Q9NP61		0	55.55	9.1942e-06	2	1146.53	1.02682	50.2272	0
	High	LSASSSISSADLFEEPR	2	1	1	Q9NP61		0	47.08	0.000123407	2	1795.87	-1.78628	73.0344	0
P30050	60S ribosomal protein L12 OS=Homo sapiens GN=RPL12 PE=1 SV=1 - [RL12_HUMAN]	519.908	33.33	1	4	4	18	165	17.8075	9.42236
	A2	Sequence	# PSMs	# Proteins	# Protein Groups	Protein Group Accessions	Modifications	ΔCn	IonScore	Exp Value	Charge	MH+ [Da]	ΔM [ppm]	RT [min]	# Missed Cleavages
	High	EILGTAQSVGcNVDGR	2	1	1	P30050	C11(Carbamidomethyl)	0	69.72	8.15946e-07	2	1675.81	-0.487782	43.4718	0
	High	HSGNITFDEIVNIAR	3	1	1	P30050		0	68.8	1.03483e-06	3	1685.87	3.04028	88.7066	0
	High	cTGGEVGATSALAPK	1	1	1	P30050	C1(Carbamidomethyl)	0	62.74	3.72476e-06	2	1418.69	-3.42746	24.7889	0
	High	IGPLGLSPK	12	1	1	P30050		0	54.56	3.32448e-06	2	881.543	-2.43748	39.8782	0
Q96A49	Synapse-associated protein 1 OS=Homo sapiens GN=SYAP1 PE=1 SV=1 - [SYAP1_HUMAN]	497.208	24.43	1	7	7	14	352	39.9089	4.52588
	A2	Sequence	# PSMs	# Proteins	# Protein Groups	Protein Group Accessions	Modifications	ΔCn	IonScore	Exp Value	Charge	MH+ [Da]	ΔM [ppm]	RT [min]	# Missed Cleavages
	High	ITESVAETAQTIK	6	1	1	Q96A49		0	85.02	2.56541e-08	2	1390.74	1.50505	32.5703	0
	High	EQDLPLAEAVRPK	1	1	1	Q96A49		0	67.17	9.68928e-07	2	1465.8	-3.1157	41.6725	1
	High	QEETAVLEEDSADWEK	1	1	1	Q96A49		0	62.76	1.37712e-06	2	1878.82	-2.67933	62.4711	0
	High	ELQQELQEYEVVTESEK	1	1	1	Q96A49		0	55.15	1.71076e-05	2	2080.99	-0.433814	79.514	0
	High	QSAQLTALAAQQQAAGK	2	1	1	Q96A49		0	54.91	1.9371e-05	2	1684.89	-1.95533	34.9834	0
	High	ELQQELQEYEVVTESEKR	1	1	1	Q96A49		0	54.4	2.39632e-05	2	2237.1	1.97691	72.6144	1
	High	KFVEEQHTK	2	1	1	Q96A49		0	42.19	0.000480139	3	1145.59	-1.79963	8.40296	1
P43243	Matrin-3 OS=Homo sapiens GN=MATR3 PE=1 SV=2 - [MATR3_HUMAN]	437.599	19.36	1	12	12	17	847	94.5648	6.25244
	A2	Sequence	# PSMs	# Proteins	# Protein Groups	Protein Group Accessions	Modifications	ΔCn	IonScore	Exp Value	Charge	MH+ [Da]	ΔM [ppm]	RT [min]	# Missed Cleavages
	High	GDADQASNILASFGLSAR	2	1	1	P43243		0	78.92	9.48925e-08	2	1792.88	-1.16718	107.487	0
	High	SFQQSSLSR	2	1	1	P43243		0	61.14	7.19137e-06	2	1039.51	-2.31019	15.8176	0
	High	IEELDQENEAALENGIK	1	1	1	P43243		0	59.59	6.86879e-06	2	1914.93	-0.417235	62.0538	0
	High	GNLGAGNGNLQGPR	1	1	1	P43243		0	58.1	1.13064e-05	2	1324.67	-4.44808	18.3367	0
	High	TEEGPTLSYGR	1	1	1	P43243		0	55.31	2.04637e-05	2	1209.57	-3.74955	25.3367	0
	High	LcSLFYTNEEVAK	1	1	1	P43243	C2(Carbamidomethyl)	0	50.11	5.31369e-05	2	1573.75	-2.84698	62.4148	0
	High	GPGPLQER	1	1	1	P43243		0	47.77	9.35811e-05	2	853.45	-2.58275	12.2304	0
	High	DLSAAGIGLLAAATQSLSMPASLGR	1	1	1	P43243		0	47.18	4.40279e-05	3	2371.28	6.2283	113.292	0
	High	VVHIMDFQR	2	1	1	P43243		0	43.78	0.000391572	3	1144.59	-2.04992	40.3061	0
	High	VIHLSNLPHSGYSDSAVLK	3	1	1	P43243		0	41.28	0.000413326	4	2037.07	-4.07221	54.5371	0
	High	FDSEYER	1	1	1	P43243		0	30.15	0.000724538	2	945.392	-3.28971	15.3408	0
	High	ITPENLPQILLQLK	1	1	1	P43243		0	22.27	0.00189287	2	1619.98	6.88848	110.019	0
Q13310	Polyadenylate-binding protein 4 OS=Homo sapiens GN=PABPC4 PE=1 SV=1 - [PABP4_HUMAN]	433.885	17.86	1	5	10	14	644	70.7381	9.26123
	A2	Sequence	# PSMs	# Proteins	# Protein Groups	Protein Group Accessions	Modifications	ΔCn	IonScore	Exp Value	Charge	MH+ [Da]	ΔM [ppm]	RT [min]	# Missed Cleavages
	High	ALYDTFSAFGNILScK	1	2	2	P11940;Q13310	C15(Carbamidomethyl)	0	87.69	1.02981e-08	2	1806.88	2.66315	109.913	0
	High	PLYVALAQR	4	2	2	P11940;Q13310		0	76.31	1.12264e-07	2	1030.6	-3.685	45.2249	0
	High	SGVGNVFIK	1	1	1	Q13310		0	71.66	5.11754e-07	2	920.518	-2.35893	35.1086	0
	High	ALDTMNFDVIK	1	2	2	P11940;Q13310		0	50.39	7.17579e-05	2	1266.64	0.689516	76.0056	0
	High	MNGMLLNDR	1	2	2	P11940;Q13310		0	45.38	0.000182533	2	1063.5	-3.80131	34.9304	0
	High	NFGEEVDDESLK	1	1	1	Q13310		0	40.31	0.000195533	2	1381.6	-7.3242	41.6052	0
	High	EFSPFGSITSAK	2	1	1	Q13310		0	38.89	0.000800556	2	1270.63	2.26158	67.9973	0
	High	SKVDEAVAVLQAHHAK	1	1	1	Q13310		0	36.27	0.00121565	4	1702.93	1.88336	34.3261	1
	High	GFGFVcFSSPEEATK	1	2	2	P11940;Q13310	C6(Carbamidomethyl)	0	36.16	0.000738414	2	1662.74	-5.01721	79.7306	0
	High	IIFVGR	1	1	1	Q13310		0	26.96	0.00120823	2	704.446	1.48689	33.9447	0
Q13148	TAR DNA-binding protein 43 OS=Homo sapiens GN=TARDBP PE=1 SV=1 - [TADBP_HUMAN]	419.577	34.3	1	11	11	13	414	44.7113	6.18896
	A2	Sequence	# PSMs	# Proteins	# Protein Groups	Protein Group Accessions	Modifications	ΔCn	IonScore	Exp Value	Charge	MH+ [Da]	ΔM [ppm]	RT [min]	# Missed Cleavages
	High	FGGNPGGFGNQGGFGNSR	2	1	1	Q13148		0	122.28	1.83384e-12	2	1726.77	-0.657835	47.3282	0
	High	KMDETDASSAVK	2	1	1	Q13148		0	69.84	5.4989e-07	2	1281.59	-3.81979	10.4471	1
	High	MDETDASSAVK	1	1	1	Q13148		0	58.85	3.71403e-06	2	1153.5	-3.39797	13.9549	0
	High	EFFSQYGDVMDVFIPK	1	1	1	Q13148		0	50.89	5.41778e-05	2	1921.91	3.65735	111.185	0
	High	GISVHISNAEPK	1	1	1	Q13148		0	44.11	0.000281409	2	1251.67	-1.65335	23.4719	0
	High	FTEYETQVK	1	1	1	Q13148		0	42.94	0.000368416	2	1144.55	-3.36021	22.3742	0
	High	VTEDENDEPIEIPSEDDGTVLLSTVTAQFPGAcGLR	1	1	1	Q13148	C33(Carbamidomethyl)	0	38.75	0.000353383	3	3874.82	0.321962	110.727	0
	High	QSQDEPLR	1	1	1	Q13148		0	37.8	0.000912773	2	972.471	-3.5213	10.4366	0
	High	TSDLIVLGLPWK	1	1	1	Q13148		0	37.7	0.000789683	2	1341.78	-0.526289	107.479	0
	High	NPVSQcMR	1	1	1	Q13148	C6(Carbamidomethyl)	0	36.63	0.000510585	2	991.441	-3.66698	12.1406	0
	High	cTEDMTEDELR	1	1	1	Q13148	C1(Carbamidomethyl)	0	31.26	0.000336676	2	1398.55	-2.47986	27.7458	0
P62269	40S ribosomal protein S18 OS=Homo sapiens GN=RPS18 PE=1 SV=3 - [RS18_HUMAN]	414.962	38.82	1	8	8	16	152	17.7079	10.9897
	A2	Sequence	# PSMs	# Proteins	# Protein Groups	Protein Group Accessions	Modifications	ΔCn	IonScore	Exp Value	Charge	MH+ [Da]	ΔM [ppm]	RT [min]	# Missed Cleavages
	High	KADIDLTK	2	1	1	P62269		0	62.29	6.78731e-06	2	903.511	-4.2407	11.2818	1
	High	RAGELTEDEVER	5	1	1	P62269		0	58.36	8.97171e-06	3	1403.67	-3.55073	15.9007	1
	High	YSQVLANGLDNK	1	1	1	P62269		0	58.25	1.46631e-05	2	1321.67	-3.48783	33.2476	0
	High	VLNTNIDGR	2	1	1	P62269		0	56.59	2.60944e-05	2	1001.53	-2.94432	20.2024	0
	High	VITIMQNPR	1	1	1	P62269		0	50.58	8.1811e-05	2	1071.6	2.36111	32.7285	0
	High	IAFAITAIK	3	1	1	P62269		0	50.46	9.44472e-06	2	947.59	-3.05525	67.2452	0
	High	AGELTEDEVER	1	1	1	P62269		0	46.99	7.1995e-05	2	1247.57	-5.04831	21.3809	0
	High	ADIDLTK	1	1	1	P62269		0	46.87	0.000342306	2	775.417	-3.99759	17.1194	0
P07437	Tubulin beta chain OS=Homo sapiens GN=TUBB PE=1 SV=2 - [TBB5_HUMAN]	414.473	27.7	1	1	10	16	444	49.639	4.89404
	A2	Sequence	# PSMs	# Proteins	# Protein Groups	Protein Group Accessions	Modifications	ΔCn	IonScore	Exp Value	Charge	MH+ [Da]	ΔM [ppm]	RT [min]	# Missed Cleavages
	High	IMNTFSVVPSPK	3	2	2	P07437;P68371		0	78.35	1.22092e-07	2	1319.7	-0.959016	58.8836	0
	High	GHYTEGAELVDSVLDVVR	1	2	2	P07437;P68371		0	66.25	1.52954e-06	2	1958.98	-1.44453	109.324	0
	High	FPGQLNADLR	2	2	2	P07437;P68371		0	56.14	2.50517e-05	2	1130.59	-4.92842	49.3156	0
	High	ISVYYNEATGGK	2	1	1	P07437		0	55.07	2.19376e-05	2	1301.64	1.04184	32.5474	0
	High	LAVNMVPFPR	1	2	2	P07437;P68371		0	48.21	0.000140437	2	1143.63	-2.07732	74.5715	0
	High	NMMAAcDPR	2	2	2	P07437;P68371	C6(Carbamidomethyl)	0	47.55	1.40634e-05	2	1065.42	-4.7816	17.2845	0
	High	EVDEQMLNVQNK	2	2	2	P07437;P68371		0	45.62	0.000180944	2	1446.68	-3.80581	35.6723	0
	High	YLTVAAVFR	1	2	2	P07437;P68371		0	43.51	0.0002206	2	1039.59	0.0213142	75.77	0
	High	NSSYFVEWIPNNVK	1	2	2	P07437;P68371		0	37.89	0.00130044	2	1696.83	-1.11915	95.1935	0
	High	EIVHIQAGQcGNQIGAK	1	2	2	P68371;P07437	C10(Carbamidomethyl)	0	37.46	0.00143579	3	1822.92	-4.20699	29.2783	0
Q13283	Ras GTPase-activating protein-binding protein 1 OS=Homo sapiens GN=G3BP1 PE=1 SV=1 - [G3BP1_HUMAN]	408.558	27.25	1	10	11	16	466	52.1321	5.51611
	A2	Sequence	# PSMs	# Proteins	# Protein Groups	Protein Group Accessions	Modifications	ΔCn	IonScore	Exp Value	Charge	MH+ [Da]	ΔM [ppm]	RT [min]	# Missed Cleavages
	High	SSSPAPADIAQTVQEDLR	2	1	1	Q13283		0	108.25	9.72553e-11	2	1884.94	2.98212	83.9709	0
	High	EAGEQGDIEPR	1	1	1	Q13283		0	76.57	8.26097e-08	2	1200.55	-2.60148	12.2849	0
	High	FMQTFVLAPEGSVANK	1	1	1	Q13283		0	54.26	2.56857e-05	2	1738.89	2.87078	76.2286	0
	High	PADAVYGQK	1	1	1	Q13283		0	50.71	8.66164e-05	2	948.476	-3.15116	10.8547	0
	High	NSSYVHGGLDSNGKPADAVYGQK	3	1	1	Q13283		0	44.97	0.000125776	3	2364.11	-3.41049	27.3834	1
	High	FYVHNDIFR	1	1	1	Q13283		0	39.47	0.000999869	3	1210.6	-0.0713579	53.2642	0
	High	TFSWASVTSK	1	1	1	Q13283		0	39.39	0.000788298	2	1113.55	-3.72589	57.9269	0
	High	DFFQSYGNVVELR	2	1	1	Q13283		0	38.3	0.000917047	2	1573.76	-1.32963	98.9856	0
	High	PSPLLVGR	2	2	2	Q13283;Q9UN86		0	36.34	0.000511002	2	838.512	-2.96928	26.6665	0
	High	INIPPQR	1	1	1	Q13283		0	36.21	0.000622262	2	837.494	-0.46606	17.0858	0
	High	VMSQNFTNcHTK	1	1	1	Q13283	C9(Carbamidomethyl)	0	33.51	0.00113642	2	1466.65	-4.417	12.4249	0
P68371	Tubulin beta-2C chain OS=Homo sapiens GN=TUBB2C PE=1 SV=1 - [TBB2C_HUMAN]	403.007	31.01	1	2	11	16	445	49.799	4.89404
	A2	Sequence	# PSMs	# Proteins	# Protein Groups	Protein Group Accessions	Modifications	ΔCn	IonScore	Exp Value	Charge	MH+ [Da]	ΔM [ppm]	RT [min]	# Missed Cleavages
	High	IMNTFSVVPSPK	3	2	2	P07437;P68371		0	78.35	1.22092e-07	2	1319.7	-0.959016	58.8836	0
	High	GHYTEGAELVDSVLDVVR	1	2	2	P07437;P68371		0	66.25	1.52954e-06	2	1958.98	-1.44453	109.324	0
	High	FPGQLNADLR	2	2	2	P07437;P68371		0	56.14	2.50517e-05	2	1130.59	-4.92842	49.3156	0
	High	INVYYNEATGGK	1	1	1	P68371		0	54.31	2.89131e-05	2	1328.64	-4.97817	32.8028	0
	High	LAVNMVPFPR	1	2	2	P07437;P68371		0	48.21	0.000140437	2	1143.63	-2.07732	74.5715	0
	High	NMMAAcDPR	2	2	2	P07437;P68371	C6(Carbamidomethyl)	0	47.55	1.40634e-05	2	1065.42	-4.7816	17.2845	0
	High	EVDEQMLNVQNK	2	2	2	P07437;P68371		0	45.62	0.000180944	2	1446.68	-3.80581	35.6723	0
	High	YLTVAAVFR	1	2	2	P07437;P68371		0	43.51	0.0002206	2	1039.59	0.0213142	75.77	0
	High	AVLVDLEPGTMDSVR	1	1	1	P68371		0	42.12	0.000497147	2	1601.82	-0.273072	75.2227	0
	High	NSSYFVEWIPNNVK	1	2	2	P07437;P68371		0	37.89	0.00130044	2	1696.83	-1.11915	95.1935	0
	High	EIVHLQAGQcGNQIGAK	1	2	2	P68371;P07437	C10(Carbamidomethyl)	0	37.46	0.00143579	3	1822.92	-4.20699	29.2783	0
Q15643	Thyroid receptor-interacting protein 11 OS=Homo sapiens GN=TRIP11 PE=1 SV=2 - [TRIPB_HUMAN]	402.18	3.74	1	5	5	9	1979	227.5	5.2749
	A2	Sequence	# PSMs	# Proteins	# Protein Groups	Protein Group Accessions	Modifications	ΔCn	IonScore	Exp Value	Charge	MH+ [Da]	ΔM [ppm]	RT [min]	# Missed Cleavages
	High	AQGTDNSDQSEIcK	1	1	1	Q15643	C13(Carbamidomethyl)	0	117.12	2.42611e-12	2	1552.65	-4.08104	10.4618	0
	High	LSSLNQDNSLAEDNLK	4	1	1	Q15643		0	96.46	1.51382e-09	2	1760.87	-0.366403	46.8577	0
	High	QDIQTDNSDIFQETK	1	1	1	Q15643		0	70.75	3.74421e-07	2	1781.82	-2.04744	48.0707	0
	High	LQQALSDAENEIMR	1	1	1	Q15643		0	55.34	2.12001e-05	2	1617.8	4.7706	69.6908	0
	High	DTNAPESFKDTAESR	2	1	1	Q15643		0	47.97	4.54826e-05	2	1667.74	-3.89808	21.3436	1
Q14677	Clathrin interactor 1 OS=Homo sapiens GN=CLINT1 PE=1 SV=1 - [EPN4_HUMAN]	381.669	12	1	6	6	12	625	68.2158	6.41748
	A2	Sequence	# PSMs	# Proteins	# Protein Groups	Protein Group Accessions	Modifications	ΔCn	IonScore	Exp Value	Charge	MH+ [Da]	ΔM [ppm]	RT [min]	# Missed Cleavages
	High	QDAFANFANFSK	2	1	1	Q14677		0	91.12	3.09072e-09	2	1359.63	-1.43004	76.0009	0
	High	IGSTIDDTISK	1	1	1	Q14677		0	72.12	5.61592e-07	2	1149.6	-3.53218	25.1154	0
	High	YVGVSSDSVGGFR	1	1	1	Q14677		0	63.88	2.80344e-06	2	1329.64	-4.63034	47.0361	0
	High	ATNVVMNYSEIESK	2	1	1	Q14677		0	56.7	1.37899e-05	2	1584.75	-1.59702	51.7051	0
	High	HIHITQATETTTTR	2	1	1	Q14677		0	55.21	2.21456e-05	3	1609.82	-3.59096	14.0106	0
	High	ELVEFAQDDDR	4	1	1	Q14677		0	42.98	0.000173708	2	1336.6	-0.191038	42.1893	0
Q71U36	Tubulin alpha-1A chain OS=Homo sapiens GN=TUBA1A PE=1 SV=1 - [TBA1A_HUMAN]	377.06	21.73	1	4	8	14	451	50.1036	5.05908
	A2	Sequence	# PSMs	# Proteins	# Protein Groups	Protein Group Accessions	Modifications	ΔCn	IonScore	Exp Value	Charge	MH+ [Da]	ΔM [ppm]	RT [min]	# Missed Cleavages
	High	AVcMLSNTTAIAEAWAR	3	3	2	P68366;Q71U36	C3(Carbamidomethyl)	0	77.3	1.45243e-07	2	1864.91	3.57396	101.075	0
	High	EIIDLVLDR	2	2	1	Q71U36		0	54.26	2.90604e-05	2	1085.62	3.37649	84.9646	0
	High	EDMAALEK	1	3	2	P68366;Q71U36		0	53.21	2.55478e-05	2	906.425	1.19258	19.067	0
	High	TIQFVDWcPTGFK	1	1	1	Q71U36	C8(Carbamidomethyl)	0	52.67	3.81232e-05	2	1598.77	1.765	98.4532	0
	High	TIGGGDDSFNTFFSETGAGK	3	2	1	Q71U36		0	52.63	1.63727e-05	2	2007.9	3.33013	87.6914	0
	High	AVFVDLEPTVIDEVR	2	2	1	Q71U36		0	48.58	7.41914e-05	3	1701.91	4.68955	99.9186	0
	High	YMAccLLYR	1	3	2	P68366;Q71U36	C4(Carbamidomethyl); C5(Carbamidomethyl)	0	40.27	0.000310109	2	1249.55	-0.398285	58.5245	0
	High	FDLMYAK	1	3	2	P68366;Q71U36		0	37.36	0.00106519	2	887.433	-0.249414	51.6701	0
P62249	40S ribosomal protein S16 OS=Homo sapiens GN=RPS16 PE=1 SV=2 - [RS16_HUMAN]	358.491	24.66	1	4	4	16	146	16.435	10.2134
	A2	Sequence	# PSMs	# Proteins	# Protein Groups	Protein Group Accessions	Modifications	ΔCn	IonScore	Exp Value	Charge	MH+ [Da]	ΔM [ppm]	RT [min]	# Missed Cleavages
	High	GPLQSVQVFGR	4	1	1	P62249		0	59.28	8.26224e-06	2	1187.65	-2.72922	61.1813	0
	High	FAGVDIR	2	1	1	P62249		0	50.26	9.4189e-05	2	777.426	1.24367	34.8902	0
	High	TLLVADPR	7	1	1	P62249		0	48.32	8.17133e-05	2	884.522	2.72034	28.969	0
	High	LLEPVLLLGK	3	1	1	P62249		0	44.89	1.03543e-05	2	1094.72	4.80405	91.2712	0
O76070	Gamma-synuclein OS=Homo sapiens GN=SNCG PE=1 SV=2 - [SYUG_HUMAN]	356.684	63.78	1	6	6	10	127	13.3228	4.85596
	A2	Sequence	# PSMs	# Proteins	# Protein Groups	Protein Group Accessions	Modifications	ΔCn	IonScore	Exp Value	Charge	MH+ [Da]	ΔM [ppm]	RT [min]	# Missed Cleavages
	High	EQANAVSEAVVSSVNTVATK	1	1	1	O76070		0	79.1	9.65761e-08	2	2004.02	-0.0707122	75.317	0
	High	TVEEAENIAVTSGVVR	1	1	1	O76070		0	76.58	1.90115e-07	2	1673.87	-2.77739	58.0645	0
	High	EKEEVAEEAQSGGD	1	1	1	O76070		0	70.85	1.06892e-07	2	1477.62	-3.39893	11.4552	1
	High	ENVVQSVTSVAEK	3	1	1	O76070		0	62.58	5.57598e-06	2	1389.72	-1.90927	55.0282	0
	High	TKENVVQSVTSVAEK	1	1	1	O76070		0	48.87	0.000102477	2	1618.86	-5.22747	35.7777	1
	High	EDLRPSAPQQEGEASK	3	1	1	O76070		0	45.22	0.000145795	2	1741.83	-4.18689	13.7945	1
Q9BWF3	RNA-binding protein 4 OS=Homo sapiens GN=RBM4 PE=1 SV=1 - [RBM4_HUMAN]	354.804	19.51	1	6	6	10	364	40.2887	7.07861
	A2	Sequence	# PSMs	# Proteins	# Protein Groups	Protein Group Accessions	Modifications	ΔCn	IonScore	Exp Value	Charge	MH+ [Da]	ΔM [ppm]	RT [min]	# Missed Cleavages
	High	GLDNTEFQGK	1	1	1	Q9BWF3		0	71.83	4.23214e-07	2	1108.52	-3.48429	21.7826	0
	High	FEEYGPVIEcDIVK	3	1	1	Q9BWF3	C10(Carbamidomethyl)	0	68.82	7.02027e-07	2	1697.8	-2.54336	75.9083	0
	High	VADLTEQYNEQYGAVR	1	1	1	Q9BWF3		0	67.83	9.64175e-07	2	1855.89	2.4921	51.1339	0
	High	NYGFVHIEDK	1	1	1	Q9BWF3		0	67.58	1.22208e-06	2	1221.58	-4.90461	35.7321	0
	High	TAPGMGDQSGcYR	2	1	1	Q9BWF3	C11(Carbamidomethyl)	0	56.11	3.30624e-06	2	1399.57	-3.43854	17.0431	0
	High	LFIGNLPR	2	1	1	Q9BWF3		0	48.45	6.0728e-05	2	929.556	-1.19484	59.9793	0
P35908	Keratin, type II cytoskeletal 2 epidermal OS=Homo sapiens GN=KRT2 PE=1 SV=2 - [K22E_HUMAN]	353.613	15.02	1	5	8	12	639	65.3932	8.00146
	A2	Sequence	# PSMs	# Proteins	# Protein Groups	Protein Group Accessions	Modifications	ΔCn	IonScore	Exp Value	Charge	MH+ [Da]	ΔM [ppm]	RT [min]	# Missed Cleavages
	High	FLEQQNQVLQTK	3	2	2	P35908;P04264		0	78.99	1.12934e-07	2	1475.79	0.416707	37.6097	0
	High	NLDLDSIIAEVK	1	2	2	P35908;P13647		0	72.78	4.05967e-07	2	1329.73	-0.252453	106.541	0
	High	GFSSGSAVVSGGSR	1	1	1	P35908		0	65.89	1.86783e-06	2	1254.6	-2.74339	20.3203	0
	High	AQYEEIAQR	1	1	1	P35908		0	63.21	4.10675e-06	2	1107.54	-4.79085	18.6163	0
	High	TAAENDFVTLK	1	1	1	P35908		0	42.87	0.000395059	2	1208.61	-1.54069	41.7733	0
	High	FASFIDK	3	4	4	P35908;P13647;P05787;P08729		0	42.82	0.000457097	2	827.432	2.77264	37.5871	0
	High	GGSISGGGYGSGGGK	1	1	1	P35908		0	35.42	0.00104783	2	1197.54	-4.5145	10.7257	0
	High	HGGGGGGFGGGGFGSR	1	1	1	P35908		0	34.06	0.000706761	2	1320.58	-5.80685	17.2411	0
P05388	60S acidic ribosomal protein P0 OS=Homo sapiens GN=RPLP0 PE=1 SV=1 - [RLA0_HUMAN]	350.64	13.56	1	4	4	11	317	34.2518	5.97314
	A2	Sequence	# PSMs	# Proteins	# Protein Groups	Protein Group Accessions	Modifications	ΔCn	IonScore	Exp Value	Charge	MH+ [Da]	ΔM [ppm]	RT [min]	# Missed Cleavages
	High	GHLENNPALEK	1	1	1	P05388		0	70.98	8.09965e-07	2	1221.62	-4.83023	11.1683	0
	High	GNVGFVFTK	6	1	1	P05388		0	61.09	7.04123e-06	2	968.518	-2.05296	48.3272	0
	High	GTIEILSDVQLIK	3	1	1	P05388		0	56.31	5.49627e-06	2	1428.84	3.73587	100.572	0
	High	IIQLLDDYPK	1	1	1	P05388		0	51.25	5.81168e-05	2	1217.68	3.50754	72.4619	0
Q9Y5A9	YTH domain family protein 2 OS=Homo sapiens GN=YTHDF2 PE=1 SV=2 - [YTHD2_HUMAN]	350.455	14.16	1	5	6	13	579	62.2957	8.79248
	A2	Sequence	# PSMs	# Proteins	# Protein Groups	Protein Group Accessions	Modifications	ΔCn	IonScore	Exp Value	Charge	MH+ [Da]	ΔM [ppm]	RT [min]	# Missed Cleavages
	High	APGMNTIDQGMAALK	2	1	1	Q9Y5A9		0	73.7	2.81542e-07	2	1517.74	-3.37572	70.0581	0
	High	LGSTEVASNVPK	3	1	1	Q9Y5A9		0	66.5	1.93649e-06	2	1201.64	-5.46048	22.6746	0
	High	LENNENKPVTNSR	1	1	1	Q9Y5A9		0	58.76	9.77884e-06	2	1514.75	-3.89224	8.92807	1
	High	SAVDYNTcAGVWSQDK	1	1	1	Q9Y5A9	C8(Carbamidomethyl)	0	56.65	5.29866e-06	2	1800.78	-1.3508	49.6611	0
	High	DGLNDDDFEPYLSPQAR	5	1	1	Q9Y5A9		0	40.81	0.000232358	2	1951.86	-4.46211	81.8013	0
	High	SYSEDDIHR	1	2	2	Q9Y5A9;Q7Z739		0	33.67	0.00135304	2	1121.48	-3.75068	11.9024	0
Q8IY67	Ribonucleoprotein PTB-binding 1 OS=Homo sapiens GN=RAVER1 PE=1 SV=1 - [RAVR1_HUMAN]	347.2	12.21	1	6	6	16	606	63.8372	8.48486
	A2	Sequence	# PSMs	# Proteins	# Protein Groups	Protein Group Accessions	Modifications	ΔCn	IonScore	Exp Value	Charge	MH+ [Da]	ΔM [ppm]	RT [min]	# Missed Cleavages
	High	LPPGFNDVDALcR	3	1	1	Q8IY67	C12(Carbamidomethyl)	0	67.86	1.27672e-06	2	1473.72	4.68501	70.8276	0
	High	SGAEVEAGDAAER	3	1	1	Q8IY67		0	61.94	2.30305e-06	2	1261.56	-3.85614	11.8877	0
	High	EALGLGPPAAQLTPPPAPVGLR	6	1	1	Q8IY67		0	48.66	1.76988e-05	2	2122.21	6.05973	90.4112	0
	High	GYGFAEYMK	1	1	1	Q8IY67		0	43.21	0.000157585	2	1065.47	-1.5236	58.5456	0
	High	SDLLGKPLGPR	2	1	1	Q8IY67		0	39.94	0.000268687	2	1152.67	-1.35045	30.6549	1
	High	YcFVDK	1	1	1	Q8IY67	C2(Carbamidomethyl)	0	33.3	0.00112256	2	831.371	0.240371	23.0177	0
P05783	Keratin, type I cytoskeletal 18 OS=Homo sapiens GN=KRT18 PE=1 SV=2 - [K1C18_HUMAN]	338.03	31.86	1	9	9	12	430	48.0285	5.45264
	A2	Sequence	# PSMs	# Proteins	# Protein Groups	Protein Group Accessions	Modifications	ΔCn	IonScore	Exp Value	Charge	MH+ [Da]	ΔM [ppm]	RT [min]	# Missed Cleavages
	High	PVSSAASVYAGAGGSGSR	1	1	1	P05783		0	83.67	3.20005e-08	2	1580.76	-2.08265	24.4221	0
	High	AQIFANTVDNAR	1	1	1	P05783		0	67.31	1.59771e-06	2	1319.66	-5.52401	34.2406	0
	High	LLEDGEDFNLGDALDSSNSMQTIQK	1	1	1	P05783		0	60.64	3.19302e-06	2	2740.27	3.14718	99.9069	0
	High	LQLETEIEALKEELLFMK	2	1	1	P05783		0	54.63	1.06748e-05	2	2177.18	1.25028	111.944	1
	High	GGMGSGGLATGIAGGLAGMGGIQNEK	1	1	1	P05783		0	51.2	4.24803e-05	2	2261.1	1.37034	90.405	0
	High	VIDDTNITR	1	1	1	P05783		0	47.86	0.000179231	2	1046.54	-4.60279	18.809	0
	High	LEAEIATYR	2	1	1	P05783		0	43.14	0.000461024	2	1065.56	0.803248	33.9414	0
	High	QAQEYEALLNIK	2	1	1	P05783		0	39.88	0.000837833	2	1419.74	-2.16428	74.443	0
	High	AQYDELAR	1	1	1	P05783		0	38.05	0.00119073	2	965.466	-3.27155	20.7058	0
A0AV96	RNA-binding protein 47 OS=Homo sapiens GN=RBM47 PE=1 SV=1 - [RBM47_HUMAN]	335.154	10.79	1	4	4	11	593	64.0263	7.6792
	A2	Sequence	# PSMs	# Proteins	# Protein Groups	Protein Group Accessions	Modifications	ΔCn	IonScore	Exp Value	Charge	MH+ [Da]	ΔM [ppm]	RT [min]	# Missed Cleavages
	High	LLGVccSVDNcR	3	1	1	A0AV96	C5(Carbamidomethyl); C6(Carbamidomethyl); C11(Carbamidomethyl)	0	64.48	1.05153e-06	2	1452.64	-2.57302	37.9329	0
	High	TAEDSTAAMSSDSAAGSSAK	4	1	1	A0AV96		0	56.27	3.42269e-06	2	1844.78	-2.91128	14.4465	0
	High	SFGQFNPGcVER	2	1	1	A0AV96	C9(Carbamidomethyl)	0	50.03	4.36971e-05	2	1397.63	0.022383	51.1241	0
	High	VPEGVAGAPNEAALLALMER	2	1	1	A0AV96		0	47.34	8.76382e-05	2	2008.05	0.764854	107.318	0
P35527	Keratin, type I cytoskeletal 9 OS=Homo sapiens GN=KRT9 PE=1 SV=3 - [K1C9_HUMAN]	313.785	10.11	1	4	4	7	623	62.0268	5.23682
	A2	Sequence	# PSMs	# Proteins	# Protein Groups	Protein Group Accessions	Modifications	ΔCn	IonScore	Exp Value	Charge	MH+ [Da]	ΔM [ppm]	RT [min]	# Missed Cleavages
	High	GGSGGSYGGGGSGGGYGGGSGSR	2	1	1	P35527		0	96.21	1.31632e-10	2	1791.72	-2.845	11.003	0
	High	FSSSSGYGGGSSR	1	1	1	P35527		0	69.89	1.94874e-07	2	1235.52	-3.57881	11.382	0
	High	SGGGGGGGLGSGGSIR	3	1	1	P35527		0	63.79	3.34264e-06	2	1232.59	-3.0241	13.3361	0
	High	QGVDADINGLR	1	1	1	P35527		0	47.83	0.000135973	2	1157.58	-5.69558	35.8545	0
P62424	60S ribosomal protein L7a OS=Homo sapiens GN=RPL7A PE=1 SV=2 - [RL7A_HUMAN]	273.898	21.43	1	6	6	11	266	29.977	10.6089
	A2	Sequence	# PSMs	# Proteins	# Protein Groups	Protein Group Accessions	Modifications	ΔCn	IonScore	Exp Value	Charge	MH+ [Da]	ΔM [ppm]	RT [min]	# Missed Cleavages
	High	NFGIGQDIQPK	1	1	1	P62424		0	59.53	1.03629e-05	2	1216.63	-1.80078	44.6708	0
	High	TcTTVAFTQVNSEDK	6	1	1	P62424	C2(Carbamidomethyl)	0	51.76	2.63389e-05	2	1700.78	-2.19241	35.5268	0
	High	VVNPLFEK	1	1	1	P62424		0	46.64	0.000244951	2	945.539	-1.79518	41.4512	0
	High	KVVNPLFEK	1	1	1	P62424		0	44.6	0.000168167	2	1073.63	-4.19541	25.0512	1
	High	RPPVLR	1	1	1	P62424		0	41.76	0.000126693	2	737.476	-2.78045	9.86987	1
	High	LKVPPAINQFTQALDR	1	1	1	P62424		0	31.55	0.00115474	3	1811.03	4.31877	91.8938	1
P62847	40S ribosomal protein S24 OS=Homo sapiens GN=RPS24 PE=1 SV=1 - [RS24_HUMAN]	269.406	20.3	1	3	3	10	133	15.4134	10.7847
	A2	Sequence	# PSMs	# Proteins	# Protein Groups	Protein Group Accessions	Modifications	ΔCn	IonScore	Exp Value	Charge	MH+ [Da]	ΔM [ppm]	RT [min]	# Missed Cleavages
	High	QMVIDVLHPGK	6	1	1	P62847		0	72.92	2.90988e-07	2	1236.68	0.95165	50.3824	0
	High	KQMVIDVLHPGK	3	1	1	P62847		0	52.55	1.91787e-05	3	1364.78	3.1338	34.1905	1
	High	TTGFGMIYDSLDYAK	1	1	1	P62847		0	36.48	0.00111328	2	1681.77	-2.45697	99.9752	0
P46781	40S ribosomal protein S9 OS=Homo sapiens GN=RPS9 PE=1 SV=3 - [RS9_HUMAN]	268.504	16.49	1	4	4	11	194	22.5776	10.6528
	A2	Sequence	# PSMs	# Proteins	# Protein Groups	Protein Group Accessions	Modifications	ΔCn	IonScore	Exp Value	Charge	MH+ [Da]	ΔM [ppm]	RT [min]	# Missed Cleavages
	High	IEDFLER	2	1	1	P46781		0	54.6	3.22465e-05	2	921.465	-2.75193	45.3946	0
	High	LFEGNALLR	3	1	1	P46781		0	54.53	2.81897e-05	2	1032.58	-2.29025	58.6996	0
	High	IGVLDEGK	1	1	1	P46781		0	49.84	0.000106865	2	830.462	0.414831	22.4936	0
	High	LDYILGLK	5	1	1	P46781		0	45.61	5.63318e-05	2	934.566	5.42844	70.813	0
P78344	Eukaryotic translation initiation factor 4 gamma 2 OS=Homo sapiens GN=EIF4G2 PE=1 SV=1 - [IF4G2_HUMAN]	265.301	9.04	1	6	6	11	907	102.297	7.13721
	A2	Sequence	# PSMs	# Proteins	# Protein Groups	Protein Group Accessions	Modifications	ΔCn	IonScore	Exp Value	Charge	MH+ [Da]	ΔM [ppm]	RT [min]	# Missed Cleavages
	High	LAEDAPNFDGPAAEGQPGQK	2	1	1	P78344		0	67.22	9.00935e-07	2	2011.93	-1.32226	40.8589	0
	High	EWLTELFQQSK	1	1	1	P78344		0	52.58	5.18953e-05	2	1408.71	-3.48061	105.268	0
	High	TAGNSEFLGK	1	1	1	P78344		0	50.33	7.6e-05	2	1023.51	-3.87091	19.0028	0
	High	VIILSLDR	1	1	1	P78344		0	46.24	7.24936e-05	2	928.581	-1.65738	60.1505	0
	High	LEVDIPLVK	4	1	1	P78344		0	44.9	4.04492e-05	2	1025.63	3.58211	74.7759	0
	High	SQGLSQLYHNQSQGLLSQLQGQSK	2	1	1	P78344		0	37.5	0.000533484	2	2629.34	3.9432	77.1999	0
P39019	40S ribosomal protein S19 OS=Homo sapiens GN=RPS19 PE=1 SV=2 - [RS19_HUMAN]	263.99	26.9	1	4	4	10	145	16.0505	10.3159
	A2	Sequence	# PSMs	# Proteins	# Protein Groups	Protein Group Accessions	Modifications	ΔCn	IonScore	Exp Value	Charge	MH+ [Da]	ΔM [ppm]	RT [min]	# Missed Cleavages
	High	ELAPYDENWFYTR	6	1	1	P39019		0	67.6	6.42986e-07	2	1703.77	-0.283167	90.9698	0
	High	RVLQALEGLK	2	1	1	P39019		0	50.85	1.89116e-05	2	1126.69	-2.87893	45.9584	1
	High	DVNQQEFVR	1	1	1	P39019		0	45.29	0.000264742	2	1134.55	-2.24245	25.0308	0
	High	ALAAFLK	1	1	1	P39019		0	32.4	0.00132351	2	733.463	3.25855	46.3437	0
P09211	Glutathione S-transferase P OS=Homo sapiens GN=GSTP1 PE=1 SV=2 - [GSTP1_HUMAN]	258.734	35.24	1	5	5	11	210	23.341	5.64307
	A2	Sequence	# PSMs	# Proteins	# Protein Groups	Protein Group Accessions	Modifications	ΔCn	IonScore	Exp Value	Charge	MH+ [Da]	ΔM [ppm]	RT [min]	# Missed Cleavages
	High	AScLYGQLPK	5	1	1	P09211	C3(Carbamidomethyl)	0	55.54	2.49933e-05	2	1136.57	-3.49447	36.8019	0
	High	DQQEAALVDMVNDGVEDLR	1	1	1	P09211		0	50.06	5.12865e-05	2	2116.98	0.266433	109.534	0
	High	FQDGDLTLYQSNTILR	2	1	1	P09211		0	48.42	9.28025e-05	2	1883.95	-1.01262	82.5296	0
	High	AFLASPEYVNLPINGNGK	2	1	1	P09211		0	42.37	0.000356349	2	1903.98	-4.64911	85.6152	0
	High	PPYTVVYFPVR	1	1	1	P09211		0	42.2	0.000307305	2	1337.73	2.73459	78.0086	0
P22061	Protein-L-isoaspartate(D-aspartate) O-methyltransferase OS=Homo sapiens GN=PCMT1 PE=1 SV=3 - [PIMT_HUMAN]	251.332	15.86	1	3	3	8	227	24.6346	7.21045
	A2	Sequence	# PSMs	# Proteins	# Protein Groups	Protein Group Accessions	Modifications	ΔCn	IonScore	Exp Value	Charge	MH+ [Da]	ΔM [ppm]	RT [min]	# Missed Cleavages
	High	ELVDDSINNVR	5	1	1	P22061		0	74.05	3.87647e-07	2	1273.64	-1.80379	37.2269	0
	High	KDDPTLLSSGR	1	1	1	P22061		0	49.24	0.000101851	2	1188.62	-4.0705	16.2964	1
	High	SGGASHSELIHNLR	2	1	1	P22061		0	38.64	0.00145663	3	1477.74	-5.47013	17.8406	0
P62280	40S ribosomal protein S11 OS=Homo sapiens GN=RPS11 PE=1 SV=3 - [RS11_HUMAN]	250.403	13.29	1	3	3	9	158	18.419	10.3013
	A2	Sequence	# PSMs	# Proteins	# Protein Groups	Protein Group Accessions	Modifications	ΔCn	IonScore	Exp Value	Charge	MH+ [Da]	ΔM [ppm]	RT [min]	# Missed Cleavages
	High	cPFTGNVSIR	6	1	1	P62280	C1(Carbamidomethyl)	0	65.96	2.4971e-06	2	1150.56	-3.69154	37.389	0
	High	EAIEGTYIDKK	2	1	1	P62280		0	44.97	0.000256328	2	1266.66	0.0798499	18.9491	1
	High	EAIEGTYIDK	1	1	1	P62280		0	42.46	0.0004739	2	1138.56	-1.73443	28.1641	0
P68366	Tubulin alpha-4A chain OS=Homo sapiens GN=TUBA4A PE=1 SV=1 - [TBA4A_HUMAN]	243.906	16.52	1	2	6	9	448	49.8924	5.05908
	A2	Sequence	# PSMs	# Proteins	# Protein Groups	Protein Group Accessions	Modifications	ΔCn	IonScore	Exp Value	Charge	MH+ [Da]	ΔM [ppm]	RT [min]	# Missed Cleavages
	High	AVcMLSNTTAIAEAWAR	3	3	2	P68366;Q71U36	C3(Carbamidomethyl)	0	77.3	1.45243e-07	2	1864.91	3.57396	101.075	0
	High	EDMAALEK	1	3	2	P68366;Q71U36		0	53.21	2.55478e-05	2	906.425	1.19258	19.067	0
	High	YMAccLLYR	1	3	2	P68366;Q71U36	C4(Carbamidomethyl); C5(Carbamidomethyl)	0	40.27	0.000310109	2	1249.55	-0.398285	58.5245	0
	High	TIGGGDDSFTTFFcETGAGK	2	1	1	P68366	C14(Carbamidomethyl)	0	39.65	0.000168009	2	2067.89	-2.47125	95.9716	0
	High	SIQFVDWcPTGFK	1	2	1	P68366	C8(Carbamidomethyl)	0	39.25	0.000689331	2	1584.75	-0.822565	97.2572	0
	High	FDLMYAK	1	3	2	P68366;Q71U36		0	37.36	0.00106519	2	887.433	-0.249414	51.6701	0
P05387	60S acidic ribosomal protein P2 OS=Homo sapiens GN=RPLP2 PE=1 SV=1 - [RLA2_HUMAN]	241.739	38.26	1	3	3	9	115	11.6578	4.53857
	A2	Sequence	# PSMs	# Proteins	# Protein Groups	Protein Group Accessions	Modifications	ΔCn	IonScore	Exp Value	Charge	MH+ [Da]	ΔM [ppm]	RT [min]	# Missed Cleavages
	High	ILDSVGIEADDDR	4	1	1	P05387		0	72.11	4.21396e-07	2	1417.68	-2.42628	46.8046	0
	High	YVASYLLAALGGNSSPSAK	3	1	1	P05387		0	52.79	2.68269e-05	2	1868.98	2.38773	102.032	0
	High	NIEDVIAQGIGK	2	1	1	P05387		0	44.92	0.000228696	2	1256.68	0.336458	79.0125	0
P11142	Heat shock cognate 71 kDa protein OS=Homo sapiens GN=HSPA8 PE=1 SV=1 - [HSP7C_HUMAN]	239.991	9.6	3	4	5	7	646	70.8542	5.51611
	A2	Sequence	# PSMs	# Proteins	# Protein Groups	Protein Group Accessions	Modifications	ΔCn	IonScore	Exp Value	Charge	MH+ [Da]	ΔM [ppm]	RT [min]	# Missed Cleavages
	High	FEELNADLFR	2	1	1	P11142		0	86.68	2.0297e-08	2	1253.62	3.11212	78.0282	0
	High	DAGTIAGLNVLR	2	1	1	P11142		0	59.68	8.77319e-06	2	1199.67	-0.37975	70.9245	0
	High	VEIIANDQGNR	1	4	2	P11142;P11021		0	52.39	4.90251e-05	2	1228.62	-3.0816	18.7752	0
	High	TTPSYVAFTDTER	1	3	1	P11142		0	50.91	4.78467e-05	2	1487.7	-1.62073	49.8636	0
	High	STAGDTHLGGEDFDNR	1	1	1	P11142		0	46.26	3.43058e-05	2	1691.72	-1.82035	23.561	0
Q96I24	Far upstream element-binding protein 3 OS=Homo sapiens GN=FUBP3 PE=1 SV=2 - [FUBP3_HUMAN]	238.175	11.71	1	5	5	10	572	61.6022	8.38232
	A2	Sequence	# PSMs	# Proteins	# Protein Groups	Protein Group Accessions	Modifications	ΔCn	IonScore	Exp Value	Charge	MH+ [Da]	ΔM [ppm]	RT [min]	# Missed Cleavages
	High	cGLVIGK	6	1	1	Q96I24	C1(Carbamidomethyl)	0	57.96	2.83922e-05	2	746.421	-2.54172	19.5149	0
	High	AEGFVDALHR	1	1	1	Q96I24		0	55.06	2.10525e-05	2	1114.56	-1.66874	32.9873	0
	High	GVPQQIEVAR	1	1	1	Q96I24		0	48.46	9.69413e-05	2	1096.61	-2.54367	25.0115	0
	High	GDWSVGAPGGVQEITYTVPADK	1	1	1	Q96I24		0	48.04	8.08737e-05	2	2247.08	-4.49473	80.1895	0
	High	RPLDDGVGNQLGALVHQR	1	1	1	Q96I24		0	40.67	0.0004628	3	1945.03	-3.3794	61.0778	1
Q04695	Keratin, type I cytoskeletal 17 OS=Homo sapiens GN=KRT17 PE=1 SV=2 - [K1C17_HUMAN]	238.087	12.27	1	5	5	7	432	48.076	5.021
	A2	Sequence	# PSMs	# Proteins	# Protein Groups	Protein Group Accessions	Modifications	ΔCn	IonScore	Exp Value	Charge	MH+ [Da]	ΔM [ppm]	RT [min]	# Missed Cleavages
	High	EVATNSELVQSGK	1	1	1	Q04695		0	85.24	2.64815e-08	2	1361.68	-4.33232	17.2806	0
	High	ALEEANTELEVK	1	1	1	Q04695		0	64.28	3.48989e-06	2	1345.68	-2.90532	34.7438	0
	High	DAEDWFFSK	3	1	1	Q04695		0	55.32	8.22542e-06	2	1144.5	3.99459	85.4883	0
	High	TIVEEVQDGK	1	1	1	Q04695		0	42.1	0.000687503	2	1117.57	-3.33714	24.9985	0
	High	VLDELTLAR	1	1	1	Q04695		0	39.65	0.000845463	2	1029.59	-3.34075	52.8411	0
P39023	60S ribosomal protein L3 OS=Homo sapiens GN=RPL3 PE=1 SV=2 - [RL3_HUMAN]	235.858	17.62	1	6	6	8	403	46.0798	10.1841
	A2	Sequence	# PSMs	# Proteins	# Protein Groups	Protein Group Accessions	Modifications	ΔCn	IonScore	Exp Value	Charge	MH+ [Da]	ΔM [ppm]	RT [min]	# Missed Cleavages
	High	TVFAEHISDEcK	1	1	1	P39023	C11(Carbamidomethyl)	0	67.43	7.77085e-07	2	1435.65	-3.05824	24.8421	0
	High	HGSLGFLPR	1	1	1	P39023		0	64.4	2.50524e-06	2	983.541	-1.68513	34.8627	0
	High	LEQQVPVNQVFGQDEMIDVIGVTK	1	1	1	P39023		0	56.55	8.74172e-06	2	2686.37	-0.454882	107.614	0
	High	NNASTDYDLSDK	3	1	1	P39023		0	54.75	3.18217e-06	2	1342.57	-4.21233	19.142	0
	High	FIDTTSK	1	1	1	P39023		0	46.73	0.000139073	2	811.418	-2.45393	11.4134	0
	High	SLLVQTK	1	1	1	P39023		0	42.37	0.000428777	2	788.484	-4.64936	17.256	0
Q9BVK6	Transmembrane emp24 domain-containing protein 9 OS=Homo sapiens GN=TMED9 PE=1 SV=2 - [TMED9_HUMAN]	230.784	4.68	1	1	1	6	235	27.2602	8.01611
	A2	Sequence	# PSMs	# Proteins	# Protein Groups	Protein Group Accessions	Modifications	ΔCn	IonScore	Exp Value	Charge	MH+ [Da]	ΔM [ppm]	RT [min]	# Missed Cleavages
	High	QLVEQVEQIQK	6	1	1	Q9BVK6		0	59.61	6.72783e-06	2	1341.73	-4.7004	39.8759	0
P62241	40S ribosomal protein S8 OS=Homo sapiens GN=RPS8 PE=1 SV=2 - [RS8_HUMAN]	228.473	25	1	4	4	6	208	24.1902	10.3159
	A2	Sequence	# PSMs	# Proteins	# Protein Groups	Protein Group Accessions	Modifications	ΔCn	IonScore	Exp Value	Charge	MH+ [Da]	ΔM [ppm]	RT [min]	# Missed Cleavages
	High	IIDVVYNASNNELVR	3	1	1	P62241		0	91.6	4.25476e-09	2	1718.92	4.56414	70.094	0
	High	ISSLLEEQFQQGK	1	1	1	P62241		0	68.53	1.22746e-06	2	1506.77	-4.75096	59.2644	0
	High	ADGYVLEGK	1	1	1	P62241		0	54.37	3.41831e-05	2	951.474	-4.5264	21.3903	0
	High	LDVGNFSWGSEccTR	1	1	1	P62241	C12(Carbamidomethyl); C13(Carbamidomethyl)	0	29.52	0.000949334	2	1787.74	-2.55613	75.8266	0
Q14444	Caprin-1 OS=Homo sapiens GN=CAPRIN1 PE=1 SV=2 - [CAPR1_HUMAN]	223.732	10.16	1	6	6	8	709	78.318	5.24951
	A2	Sequence	# PSMs	# Proteins	# Protein Groups	Protein Group Accessions	Modifications	ΔCn	IonScore	Exp Value	Charge	MH+ [Da]	ΔM [ppm]	RT [min]	# Missed Cleavages
	High	QFMAETQFTSGEK	2	1	1	Q14444		0	69.79	3.46349e-07	2	1503.67	-2.66362	47.7651	0
	High	QGLNGVPILSEEELSLLDEFYK	1	1	1	Q14444		0	62.49	2.25455e-06	2	2493.29	4.27042	112.468	0
	High	LNQDQLDAVSK	1	1	1	Q14444		0	48.44	0.000147515	2	1230.63	-4.97383	24.8905	0
	High	DGYQQNFK	2	1	1	Q14444		0	45.9	0.000102816	2	999.448	-4.59094	16.5427	0
	High	SFMALSQDIQK	1	1	1	Q14444		0	42.45	0.000381131	2	1267.63	-4.03021	58.9545	0
	High	LDDYQER	1	1	1	Q14444		0	42.14	0.000253541	2	938.417	-4.22442	11.2887	0
Q8N0X7	Spartin OS=Homo sapiens GN=SPG20 PE=1 SV=1 - [SPG20_HUMAN]	221.323	7.36	1	4	4	5	666	72.7878	5.90967
	A2	Sequence	# PSMs	# Proteins	# Protein Groups	Protein Group Accessions	Modifications	ΔCn	IonScore	Exp Value	Charge	MH+ [Da]	ΔM [ppm]	RT [min]	# Missed Cleavages
	High	GLATSLQNDLQEVPK	2	1	1	Q8N0X7		0	99.96	6.15644e-10	2	1612.85	-1.04579	78.4081	0
	High	ENQEGAANVNVR	1	1	1	Q8N0X7		0	68.98	6.7031e-07	2	1300.62	-3.38669	12.2223	0
	High	cIVNNVSAETVQTVR	1	1	1	Q8N0X7	C1(Carbamidomethyl)	0	53.15	3.72813e-05	2	1689.86	-2.08362	49.3787	0
	High	AFLFVNK	1	1	1	Q8N0X7		0	39.63	0.000642469	2	838.482	-0.760128	52.5532	0
P04406	Glyceraldehyde-3-phosphate dehydrogenase OS=Homo sapiens GN=GAPDH PE=1 SV=3 - [G3P_HUMAN]	221.236	11.04	1	3	3	5	335	36.0304	8.45557
	A2	Sequence	# PSMs	# Proteins	# Protein Groups	Protein Group Accessions	Modifications	ΔCn	IonScore	Exp Value	Charge	MH+ [Da]	ΔM [ppm]	RT [min]	# Missed Cleavages
	High	VPTANVSVVDLTcR	2	1	1	P04406	C13(Carbamidomethyl)	0	88.6	1.03529e-08	2	1530.79	-0.666759	59.8911	0
	High	VGVNGFGR	2	1	1	P04406		0	52.54	6.60265e-05	2	805.429	-2.79782	22.0568	0
	High	GALQNIIPASTGAAK	1	1	1	P04406		0	51.28	3.38853e-05	2	1411.79	0.447604	52.4541	0
P62750	60S ribosomal protein L23a OS=Homo sapiens GN=RPL23A PE=1 SV=1 - [RL23A_HUMAN]	221.219	8.33	1	1	1	9	156	17.6841	10.4478
	A2	Sequence	# PSMs	# Proteins	# Protein Groups	Protein Group Accessions	Modifications	ΔCn	IonScore	Exp Value	Charge	MH+ [Da]	ΔM [ppm]	RT [min]	# Missed Cleavages
	High	LAPDYDALDVANK	9	1	1	P62750		0	68.24	1.10227e-06	2	1404.7	1.22219	53.3442	0
P62829	60S ribosomal protein L23 OS=Homo sapiens GN=RPL23 PE=1 SV=1 - [RL23_HUMAN]	219.477	38.57	1	4	4	10	140	14.8561	10.5063
	A2	Sequence	# PSMs	# Proteins	# Protein Groups	Protein Group Accessions	Modifications	ΔCn	IonScore	Exp Value	Charge	MH+ [Da]	ΔM [ppm]	RT [min]	# Missed Cleavages
	High	LPAAGVGDMVMATVK	3	1	1	P62829		0	69.15	1.08849e-06	2	1459.77	3.41265	76.8222	0
	High	LPAAGVGDMVmATVK	4	1	1	P62829	M11(Oxidation)	0	58.71	1.24492e-05	2	1475.76	-0.0441444	62.1774	0
	High	ISLGLPVGAVINcADNTGAK	1	1	1	P62829	C13(Carbamidomethyl)	0	42.79	0.000239338	2	1970.03	-1.48715	93.254	0
	High	IASNAGSIA	1	1	1	P62829		0	41.13	0.00117177	2	803.425	-1.25718	18.0625	0
	High	GSAITGPVAK	1	1	1	P62829		0	36.4	0.00154634	2	900.512	-3.48015	12.3866	0
P26373	60S ribosomal protein L13 OS=Homo sapiens GN=RPL13 PE=1 SV=4 - [RL13_HUMAN]	218.068	10.9	1	2	2	7	211	24.2465	11.6489
	A2	Sequence	# PSMs	# Proteins	# Protein Groups	Protein Group Accessions	Modifications	ΔCn	IonScore	Exp Value	Charge	MH+ [Da]	ΔM [ppm]	RT [min]	# Missed Cleavages
	High	VATWFNQPAR	6	1	1	P26373		0	68.17	1.31069e-06	2	1189.61	-2.31437	46.4163	0
	High	LATQLTGPVMPVR	1	1	1	P26373		0	44.61	0.00011243	2	1382.78	-3.5261	57.8233	0
Q10471	Polypeptide N-acetylgalactosaminyltransferase 2 OS=Homo sapiens GN=GALNT2 PE=1 SV=1 - [GALT2_HUMAN]	217.054	11.56	1	5	5	7	571	64.6915	8.35303
	A2	Sequence	# PSMs	# Proteins	# Protein Groups	Protein Group Accessions	Modifications	ΔCn	IonScore	Exp Value	Charge	MH+ [Da]	ΔM [ppm]	RT [min]	# Missed Cleavages
	High	HVGSNLcLDSR	2	1	1	Q10471	C7(Carbamidomethyl)	0	73.34	3.05875e-07	2	1257.6	-2.89914	18.7	0
	High	EIILVDDYSNDPEDGALLGK	1	1	1	Q10471		0	51.35	4.36031e-05	2	2176.08	4.72595	92.7715	0
	High	QHPYTFPGGSGTVFAR	2	1	1	Q10471		0	48.94	9.57329e-05	3	1721.83	-3.24935	55.0118	0
	High	AAEVWMDEYK	1	1	1	Q10471		0	48.42	3.66894e-05	2	1241.55	-2.40362	52.9736	0
	High	QGNPVAPIK	1	1	1	Q10471		0	39.38	0.000374872	2	923.529	-2.05949	14.2825	0
Q07020	60S ribosomal protein L18 OS=Homo sapiens GN=RPL18 PE=1 SV=2 - [RL18_HUMAN]	214.292	18.62	1	3	3	5	188	21.6211	11.7222
	A2	Sequence	# PSMs	# Proteins	# Protein Groups	Protein Group Accessions	Modifications	ΔCn	IonScore	Exp Value	Charge	MH+ [Da]	ΔM [ppm]	RT [min]	# Missed Cleavages
	High	ILTFDQLALDSPK	2	1	1	Q07020		0	78.03	8.34211e-08	2	1460.81	4.60753	87.6986	0
	High	TNSTFNQVVLK	1	1	1	Q07020		0	63.75	3.24706e-06	2	1250.67	-5.63986	38.1412	0
	High	GcGTVLLSGPR	2	1	1	Q07020	C2(Carbamidomethyl)	0	53.6	4.27786e-05	2	1116.58	-2.41401	32.0722	0
Q8IWE2	Protein NOXP20 OS=Homo sapiens GN=FAM114A1 PE=1 SV=2 - [NXP20_HUMAN]	213.179	6.04	1	3	3	9	563	60.7041	4.67822
	A2	Sequence	# PSMs	# Proteins	# Protein Groups	Protein Group Accessions	Modifications	ΔCn	IonScore	Exp Value	Charge	MH+ [Da]	ΔM [ppm]	RT [min]	# Missed Cleavages
	High	ELENEENQEEQGLEEK	6	1	1	Q8IWE2		0	53.54	9.29436e-06	2	1946.85	-0.189284	29.8785	0
	High	TVSLSQMLR	1	1	1	Q8IWE2		0	46.19	0.000217595	2	1034.57	0.108788	60.5354	0
	High	LAQQLTMER	2	1	1	Q8IWE2		0	38.6	0.00146321	2	1089.57	-1.76517	24.957	0
P15880	40S ribosomal protein S2 OS=Homo sapiens GN=RPS2 PE=1 SV=2 - [RS2_HUMAN]	212.57	11.95	1	3	3	10	293	31.3046	10.2427
	A2	Sequence	# PSMs	# Proteins	# Protein Groups	Protein Group Accessions	Modifications	ΔCn	IonScore	Exp Value	Charge	MH+ [Da]	ΔM [ppm]	RT [min]	# Missed Cleavages
	High	GcTATLGNFAK	6	1	1	P15880	C2(Carbamidomethyl)	0	54.21	2.80693e-05	2	1139.55	-2.02311	31.1769	0
	High	SLEEIYLFSLPIK	1	1	1	P15880		0	39.66	0.000367688	2	1551.87	0.589065	110.453	0
	High	TYSYLTPDLWK	3	1	1	P15880		0	38.06	0.00113328	2	1386.69	0.349253	86.1427	0
P36578	60S ribosomal protein L4 OS=Homo sapiens GN=RPL4 PE=1 SV=5 - [RL4_HUMAN]	207.991	13.82	1	5	5	8	427	47.6674	11.063
	A2	Sequence	# PSMs	# Proteins	# Protein Groups	Protein Group Accessions	Modifications	ΔCn	IonScore	Exp Value	Charge	MH+ [Da]	ΔM [ppm]	RT [min]	# Missed Cleavages
	High	QPYAVSELAGHQTSAESWGTGR	2	1	1	P36578		0	69.5	5.10518e-07	2	2332.09	-3.70217	57.4354	0
	High	PLISVYSEK	2	1	1	P36578		0	57.71	1.38936e-05	2	1035.57	-3.70463	39.1066	0
	High	LDELYGTWR	2	1	1	P36578		0	43.43	0.000376772	2	1152.56	-3.84261	60.092	0
	High	SGQGAFGNMcR	1	1	1	P36578	C10(Carbamidomethyl)	0	42.42	0.000120287	2	1184.49	-0.435384	21.7559	0
	High	MINTDLSR	1	1	1	P36578		0	40.43	0.00106424	2	949.476	-0.804977	22.1151	0
Q13492	Phosphatidylinositol-binding clathrin assembly protein OS=Homo sapiens GN=PICALM PE=1 SV=2 - [PICAL_HUMAN]	207.537	8.59	1	4	4	5	652	70.71	7.89893
	A2	Sequence	# PSMs	# Proteins	# Protein Groups	Protein Group Accessions	Modifications	ΔCn	IonScore	Exp Value	Charge	MH+ [Da]	ΔM [ppm]	RT [min]	# Missed Cleavages
	High	ITAAQHSVTGSAVSK	1	1	1	Q13492		0	92.54	4.01174e-09	2	1456.77	-2.80167	10.6476	0
	High	ATTLSNAVSSLASTGLSLTK	2	1	1	Q13492		0	60.16	3.13244e-06	2	1922.04	-2.30008	108.045	0
	High	NDVNWSQPGEK	1	1	1	Q13492		0	54.25	1.24026e-05	2	1273.58	-3.50961	22.3214	0
	High	QAALEEEQAR	1	1	1	Q13492		0	51.26	5.61127e-05	2	1144.56	-2.75334	11.5784	0
P11021	78 kDa glucose-regulated protein OS=Homo sapiens GN=HSPA5 PE=1 SV=2 - [GRP78_HUMAN]	207.313	12.54	1	5	6	8	654	72.2884	5.16064
	A2	Sequence	# PSMs	# Proteins	# Protein Groups	Protein Group Accessions	Modifications	ΔCn	IonScore	Exp Value	Charge	MH+ [Da]	ΔM [ppm]	RT [min]	# Missed Cleavages
	High	ELEEIVQPIISK	1	1	1	P11021		0	56.34	7.78117e-06	2	1397.79	0.998262	71.5643	0
	High	DAGTIAGLNVMR	2	1	1	P11021		0	54.53	3.71751e-05	2	1217.63	-2.98819	61.8011	0
	High	VEIIANDQGNR	1	4	2	P11142;P11021		0	52.39	4.90251e-05	2	1228.62	-3.0816	18.7752	0
	High	TWNDPSVQQDIK	2	1	1	P11021		0	52.23	4.72745e-05	2	1430.68	-6.14583	40.0087	0
	High	SQIFSTASDNQPTVTIK	1	1	1	P11021		0	39.64	0.000896301	2	1836.93	-3.03825	55.13	0
	High	IEIESFYEGEDFSETLTR	1	1	1	P11021		0	37.85	0.000459365	2	2164.98	-4.25571	103.339	0
P68104	Elongation factor 1-alpha 1 OS=Homo sapiens GN=EEF1A1 PE=1 SV=1 - [EF1A1_HUMAN]	205.792	10.39	2	4	4	6	462	50.1091	9.01221
	A2	Sequence	# PSMs	# Proteins	# Protein Groups	Protein Group Accessions	Modifications	ΔCn	IonScore	Exp Value	Charge	MH+ [Da]	ΔM [ppm]	RT [min]	# Missed Cleavages
	High	IGGIGTVPVGR	3	2	1	P68104		0	62.12	1.96404e-06	2	1025.61	-3.32698	36.3062	0
	High	STTTGHLIYK	1	2	1	P68104		0	54.56	2.69458e-05	2	1120.6	-3.32541	13.656	0
	High	YYVTIIDAPGHR	1	2	1	P68104		0	49.35	0.000116726	2	1404.73	1.15609	48.9915	0
	High	THINIVVIGHVDSGK	1	2	1	P68104		0	35.46	0.00115201	3	1588.89	3.46863	113.342	0
P84098	60S ribosomal protein L19 OS=Homo sapiens GN=RPL19 PE=1 SV=1 - [RL19_HUMAN]	205.437	13.27	1	2	2	5	196	23.4512	11.4731
	A2	Sequence	# PSMs	# Proteins	# Protein Groups	Protein Group Accessions	Modifications	ΔCn	IonScore	Exp Value	Charge	MH+ [Da]	ΔM [ppm]	RT [min]	# Missed Cleavages
	High	VWLDPNETNEIANANSR	3	1	1	P84098		0	71.16	5.16778e-07	2	1942.93	3.53449	65.4605	0
	High	LLADQAEAR	2	1	1	P84098		0	68.14	1.51927e-06	2	986.524	-2.59181	14.552	0
Q9Y3I0	UPF0027 protein C22orf28 OS=Homo sapiens GN=C22orf28 PE=1 SV=1 - [CV028_HUMAN]	203.619	9.7	1	4	4	6	505	55.1749	7.2251
	A2	Sequence	# PSMs	# Proteins	# Protein Groups	Protein Group Accessions	Modifications	ΔCn	IonScore	Exp Value	Charge	MH+ [Da]	ΔM [ppm]	RT [min]	# Missed Cleavages
	High	NVTDVVNTcHDAGISK	1	1	1	Q9Y3I0	C9(Carbamidomethyl)	0	85.98	1.3753e-08	2	1729.81	-3.6076	29.2906	0
	High	TNLDESDVQPVK	1	1	1	Q9Y3I0		0	70.76	5.91819e-07	2	1344.66	-2.07245	24.7072	0
	High	SYNDELQFLEK	3	1	1	Q9Y3I0		0	46.73	0.000114655	2	1385.66	3.51767	74.5175	0
	High	NLDFQDVLDK	1	1	1	Q9Y3I0		0	40.93	0.000887959	2	1206.6	0.602003	76.386	0
P04632	Calpain small subunit 1 OS=Homo sapiens GN=CAPNS1 PE=1 SV=1 - [CPNS1_HUMAN]	202.912	16.79	1	4	4	6	268	28.2977	5.19873
	A2	Sequence	# PSMs	# Proteins	# Protein Groups	Protein Group Accessions	Modifications	ΔCn	IonScore	Exp Value	Charge	MH+ [Da]	ΔM [ppm]	RT [min]	# Missed Cleavages
	High	THYSNIEANESEEVR	3	1	1	P04632		0	86.33	7.79911e-09	2	1777.79	-4.21531	20.363	0
	High	SMVAVMDSDTTGK	1	1	1	P04632		0	65.24	1.15202e-06	2	1341.6	0.746811	34.4924	0
	High	LGFEEFK	1	1	1	P04632		0	36.22	0.00101482	2	869.438	-2.63893	52.1892	0
	High	TDGFGIDTcR	1	1	1	P04632	C9(Carbamidomethyl)	0	35.7	0.00075363	2	1141.49	-3.31075	32.8134	0
P16989	DNA-binding protein A OS=Homo sapiens GN=CSDA PE=1 SV=4 - [DBPA_HUMAN]	202.777	18.82	1	2	4	8	372	40.066	9.77393
	A2	Sequence	# PSMs	# Proteins	# Protein Groups	Protein Group Accessions	Modifications	ΔCn	IonScore	Exp Value	Charge	MH+ [Da]	ΔM [ppm]	RT [min]	# Missed Cleavages
	High	SVGDGETVEFDVVEGEK	3	2	2	P67809;P16989		0	74.07	1.91954e-07	2	1795.83	3.17168	66.1573	0
	High	NGYGFINR	2	2	2	P67809;P16989		0	48.33	8.887e-05	2	940.466	2.50689	32.5805	0
	High	GAEAANVTGPDGVPVEGSR	2	1	1	P16989		0	48.08	0.00010814	2	1782.86	-1.3286	33.5357	0
	High	PAPAVGEAEDKENQQATSGPNQPSVR	1	1	1	P16989		0	36.59	0.00084423	3	2677.27	-4.65672	23.6277	1
Q9Y520	Protein BAT2-like 2 OS=Homo sapiens GN=BAT2L2 PE=1 SV=2 - [BA2L2_HUMAN]	196.867	3.73	1	7	7	8	2897	316.845	9.12939
	A2	Sequence	# PSMs	# Proteins	# Protein Groups	Protein Group Accessions	Modifications	ΔCn	IonScore	Exp Value	Charge	MH+ [Da]	ΔM [ppm]	RT [min]	# Missed Cleavages
	High	TVNQQTMAAPVVK	1	1	1	Q9Y520		0	72.9	4.41061e-07	2	1386.74	-2.91708	24.8108	0
	High	GPSFNQER	1	1	1	Q9Y520		0	53.13	3.57509e-05	2	934.434	-3.62522	11.65	0
	High	LPSAQTPNGTDYVASGK	2	1	1	Q9Y520		0	52.53	4.13268e-05	2	1705.84	-1.75401	33.3627	0
	High	ESVTDYTTPSSSLPNTVATNNTK	1	1	1	Q9Y520		0	41.45	0.000333007	2	2427.15	-2.85522	54.8386	0
	High	DHAISLSEPR	1	1	1	Q9Y520		0	40.94	0.000708733	2	1124.57	-3.47863	20.5829	0
	High	LPGQDESTAGTSEQNDILK	1	1	1	Q9Y520		0	36.3	0.00123072	2	2002.96	3.66028	44.0216	0
	High	EATPVVHETEPESGSQPR	1	1	1	Q9Y520		0	33.57	0.00151642	2	1949.9	-9.28674	15.8585	0
O15119	T-box transcription factor TBX3 OS=Homo sapiens GN=TBX3 PE=1 SV=4 - [TBX3_HUMAN]	196.841	3.1	1	2	2	4	743	79.3387	8.1626
	A2	Sequence	# PSMs	# Proteins	# Protein Groups	Protein Group Accessions	Modifications	ΔCn	IonScore	Exp Value	Charge	MH+ [Da]	ΔM [ppm]	RT [min]	# Missed Cleavages
	High	EAATSELQSIQR	1	1	1	O15119		0	88.03	1.40871e-08	2	1332.68	0.93199	32.5448	0
	High	LVSGLEAKPDR	3	1	1	O15119		0	75.28	1.74925e-07	2	1184.66	-2.72437	15.1308	1
P62851	40S ribosomal protein S25 OS=Homo sapiens GN=RPS25 PE=1 SV=1 - [RS25_HUMAN]	196.823	24	1	4	4	6	125	13.7337	10.1108
	A2	Sequence	# PSMs	# Proteins	# Protein Groups	Protein Group Accessions	Modifications	ΔCn	IonScore	Exp Value	Charge	MH+ [Da]	ΔM [ppm]	RT [min]	# Missed Cleavages
	High	LNNLVLFDK	1	1	1	P62851		0	63.96	2.00895e-06	2	1075.61	-1.24808	63.5431	0
	High	DKLNNLVLFDK	1	1	1	P62851		0	61.17	3.85737e-06	2	1318.74	-0.811435	62.408	1
	High	LITPAVVSER	2	1	1	P62851		0	55.19	1.2259e-05	2	1084.63	-4.15063	37.5425	0
	High	AALQELLSK	2	1	1	P62851		0	52.15	4.23628e-05	2	972.571	-1.66869	52.9415	0
P60709	Actin, cytoplasmic 1 OS=Homo sapiens GN=ACTB PE=1 SV=1 - [ACTB_HUMAN]	194.184	11.2	2	4	4	7	375	41.7097	5.47803
	A2	Sequence	# PSMs	# Proteins	# Protein Groups	Protein Group Accessions	Modifications	ΔCn	IonScore	Exp Value	Charge	MH+ [Da]	ΔM [ppm]	RT [min]	# Missed Cleavages
	High	AGFAGDDAPR	1	2	1	P60709		0	77.38	7.12959e-08	2	976.445	-2.93834	15.4519	0
	High	EITALAPSTMK	2	2	1	P60709		0	50.67	7.79904e-05	2	1161.61	-3.56908	36.7426	0
	High	HQGVMVGMGQK	1	2	1	P60709		0	48.74	7.48493e-05	2	1171.56	-5.34701	13.7587	0
	High	GYSFTTTAER	3	2	1	P60709		0	40.19	0.000425951	2	1132.52	-2.20714	26.695	0
P83731	60S ribosomal protein L24 OS=Homo sapiens GN=RPL24 PE=1 SV=1 - [RL24_HUMAN]	193.318	14.65	1	2	2	6	157	17.7679	11.2534
	A2	Sequence	# PSMs	# Proteins	# Protein Groups	Protein Group Accessions	Modifications	ΔCn	IonScore	Exp Value	Charge	MH+ [Da]	ΔM [ppm]	RT [min]	# Missed Cleavages
	High	AITGASLADIMAK	2	1	1	P83731		0	71.06	5.79738e-07	2	1261.68	-1.51221	74.4366	0
	High	VELcSFSGYK	4	1	1	P83731	C4(Carbamidomethyl)	0	56.12	1.23393e-05	2	1189.56	0.109706	49.979	0
Q96F45	Zinc finger protein 503 OS=Homo sapiens GN=ZNF503 PE=1 SV=1 - [ZN503_HUMAN]	191.662	5.42	1	2	2	4	646	62.5158	8.70459
	A2	Sequence	# PSMs	# Proteins	# Protein Groups	Protein Group Accessions	Modifications	ΔCn	IonScore	Exp Value	Charge	MH+ [Da]	ΔM [ppm]	RT [min]	# Missed Cleavages
	High	EPGGGGGGGGGGGGGGGGVSSEK	1	1	1	Q96F45		0	105.06	4.83428e-11	2	1687.72	-3.93485	9.10324	0
	High	VPSATcQPFTPR	3	1	1	Q96F45	C6(Carbamidomethyl)	0	54.29	2.90466e-05	2	1360.67	0.477214	31.9684	0
Q8WUH6	UPF0444 transmembrane protein C12orf23 OS=Homo sapiens GN=C12orf23 PE=1 SV=1 - [CL023_HUMAN]	187.789	43.97	1	3	3	7	116	11.7411	9.31982
	A2	Sequence	# PSMs	# Proteins	# Protein Groups	Protein Group Accessions	Modifications	ΔCn	IonScore	Exp Value	Charge	MH+ [Da]	ΔM [ppm]	RT [min]	# Missed Cleavages
	High	GGVSAVAGGVTAVGSAVVNK	5	1	1	Q8WUH6		0	66.03	1.09762e-06	2	1699.94	3.26327	67.0731	0
	High	DHPQQQPGMLSR	1	1	1	Q8WUH6		0	42.48	0.000338962	2	1393.66	-4.94895	13.8043	0
	High	NQQEIPSYLNDEPPEGSMK	1	1	1	Q8WUH6		0	34.48	0.00115847	2	2175.98	-2.69531	59.8938	0
P13647	Keratin, type II cytoskeletal 5 OS=Homo sapiens GN=KRT5 PE=1 SV=3 - [K2C5_HUMAN]	185.08	6.1	1	1	4	7	590	62.34	7.73779
	A2	Sequence	# PSMs	# Proteins	# Protein Groups	Protein Group Accessions	Modifications	ΔCn	IonScore	Exp Value	Charge	MH+ [Da]	ΔM [ppm]	RT [min]	# Missed Cleavages
	High	NLDLDSIIAEVK	1	2	2	P35908;P13647		0	72.78	4.05967e-07	2	1329.73	-0.252453	106.541	0
	High	YEELQQTAGR	2	1	1	P13647		0	68.7	1.09266e-06	2	1194.57	-4.27726	16.437	0
	High	FASFIDK	3	4	4	P35908;P13647;P05787;P08729		0	42.82	0.000457097	2	827.432	2.77264	37.5871	0
	High	FLEQQNK	1	8	5	P13647;P05787;O43790;P08670;P08729		0	40.44	0.00123348	2	906.465	-2.94849	11.2158	0
P50914	60S ribosomal protein L14 OS=Homo sapiens GN=RPL14 PE=1 SV=4 - [RL14_HUMAN]	181.341	10.7	1	2	2	5	215	23.417	10.9312
	A2	Sequence	# PSMs	# Proteins	# Protein Groups	Protein Group Accessions	Modifications	ΔCn	IonScore	Exp Value	Charge	MH+ [Da]	ΔM [ppm]	RT [min]	# Missed Cleavages
	High	LVAIVDVIDQNR	2	1	1	P50914		0	72.23	2.00468e-07	2	1354.77	0.275625	78.5668	0
	High	ALVDGPcTQVR	3	1	1	P50914	C7(Carbamidomethyl)	0	55.25	2.53758e-05	2	1215.61	-3.26068	25.0786	0
Q9UN86	Ras GTPase-activating protein-binding protein 2 OS=Homo sapiens GN=G3BP2 PE=1 SV=2 - [G3BP2_HUMAN]	180.711	12.45	1	5	6	9	482	54.0878	5.5542
	A2	Sequence	# PSMs	# Proteins	# Protein Groups	Protein Group Accessions	Modifications	ΔCn	IonScore	Exp Value	Charge	MH+ [Da]	ΔM [ppm]	RT [min]	# Missed Cleavages
	High	APEYLHR	2	1	1	Q9UN86		0	55.58	1.97836e-05	2	885.455	-3.24095	11.3009	0
	High	TEELKPQVEEK	1	1	1	Q9UN86		0	44.88	0.000290953	2	1329.68	-3.7312	11.9659	1
	High	VEAKPEVQSQPPR	2	1	1	Q9UN86		0	40.78	0.000522252	3	1464.78	-3.40217	10.5337	1
	High	VLSLNFSEcHTK	1	1	1	Q9UN86	C9(Carbamidomethyl)	0	38.1	0.00116936	2	1434.7	-2.8844	41.6625	0
	High	FYVHNDMFR	1	1	1	Q9UN86		0	36.77	0.000799436	3	1228.56	2.38145	48.8674	0
	High	PSPLLVGR	2	2	2	Q13283;Q9UN86		0	36.34	0.000511002	2	838.512	-2.96928	26.6665	0
Q92499	ATP-dependent RNA helicase DDX1 OS=Homo sapiens GN=DDX1 PE=1 SV=2 - [DDX1_HUMAN]	177.51	11.22	1	6	6	9	740	82.3798	7.2251
	A2	Sequence	# PSMs	# Proteins	# Protein Groups	Protein Group Accessions	Modifications	ΔCn	IonScore	Exp Value	Charge	MH+ [Da]	ΔM [ppm]	RT [min]	# Missed Cleavages
	High	GSAFAIGSDGLccQSR	1	1	1	Q92499	C12(Carbamidomethyl); C13(Carbamidomethyl)	0	53.29	1.19547e-05	2	1685.73	-3.25338	52.7167	0
	High	ELAEQTLNNIK	3	1	1	Q92499		0	52	5.33159e-05	2	1272.68	1.46204	41.1906	0
	High	FLVLDEADGLLSQGYSDFINR	2	1	1	Q92499		0	40.84	0.000383224	3	2372.18	1.98276	112.435	0
	High	LDDLVSTGK	1	1	1	Q92499		0	38.38	0.00159006	2	947.502	-2.52194	22.3819	0
	High	ALIVEPSR	1	1	1	Q92499		0	35.81	0.00125962	2	884.519	-1.48888	24.4247	0
	High	GHVDILAPTVQELAALEK	1	1	1	Q92499		0	34.12	0.00125859	3	1904.04	-3.23185	99.3509	0
Q96IJ6	Mannose-1-phosphate guanyltransferase alpha OS=Homo sapiens GN=GMPPA PE=1 SV=1 - [GMPPA_HUMAN]	175.127	10.95	1	3	3	6	420	46.2621	7.21045
	A2	Sequence	# PSMs	# Proteins	# Protein Groups	Protein Group Accessions	Modifications	ΔCn	IonScore	Exp Value	Charge	MH+ [Da]	ΔM [ppm]	RT [min]	# Missed Cleavages
	High	AVILIGGPQK	1	1	1	Q96IJ6		0	59.47	5.64898e-07	2	995.621	-3.54236	35.0566	0
	High	VAPSAVLGPNVSIGK	3	1	1	Q96IJ6		0	51.46	1.10747e-05	2	1408.82	0.0314218	52.9935	0
	High	NQQDGQLEDSPGLWPGAGTIR	2	1	1	Q96IJ6		0	37.75	0.00101568	2	2239.08	0.594715	76.5281	0
P50991	T-complex protein 1 subunit delta OS=Homo sapiens GN=CCT4 PE=1 SV=4 - [TCPD_HUMAN]	174.723	13.91	1	6	6	7	539	57.8878	7.82568
	A2	Sequence	# PSMs	# Proteins	# Protein Groups	Protein Group Accessions	Modifications	ΔCn	IonScore	Exp Value	Charge	MH+ [Da]	ΔM [ppm]	RT [min]	# Missed Cleavages
	High	ETLLNSATTSLNSK	2	1	1	P50991		0	68.15	9.95207e-07	2	1478.77	-1.75407	50.3057	0
	High	FSNISAAK	1	1	1	P50991		0	48.25	0.00013915	2	837.445	-1.83584	12.2959	0
	High	LGGTIDDcELVEGLVLTQK	1	1	1	P50991	C8(Carbamidomethyl)	0	47.35	0.00011873	3	2060.06	0.253683	104.847	0
	High	GDVTITNDGATILK	1	1	1	P50991		0	44.75	0.000304819	2	1417.75	-3.63588	50.5584	0
	High	AVADAIR	1	1	1	P50991		0	41.66	0.00090751	2	715.407	-3.39122	11.9912	0
	High	VIDPATATSVDLR	1	1	1	P50991		0	40.84	0.000601621	2	1357.74	6.01201	51.3207	0
P04792	Heat shock protein beta-1 OS=Homo sapiens GN=HSPB1 PE=1 SV=2 - [HSPB1_HUMAN]	170.1	26.34	1	4	4	6	205	22.7685	6.40479
	A2	Sequence	# PSMs	# Proteins	# Protein Groups	Protein Group Accessions	Modifications	ΔCn	IonScore	Exp Value	Charge	MH+ [Da]	ΔM [ppm]	RT [min]	# Missed Cleavages
	High	LFDQAFGLPR	2	1	1	P04792		0	77.99	1.30261e-07	2	1163.62	0.476263	77.8875	0
	High	LPEEWSQWLGGSSWPGYVR	1	1	1	P04792		0	48.87	7.13449e-05	2	2234.07	0.0343273	110.319	0
	High	DGVVEITGK	2	1	1	P04792		0	45	0.00038896	2	917.49	-3.80086	22.8132	0
	High	VSLDVNHFAPDELTVK	1	1	1	P04792		0	42.27	0.000361684	2	1783.93	2.16819	73.3197	0
P62910	60S ribosomal protein L32 OS=Homo sapiens GN=RPL32 PE=1 SV=2 - [RL32_HUMAN]	169.04	14.81	1	2	2	4	135	15.8498	11.3267
	A2	Sequence	# PSMs	# Proteins	# Protein Groups	Protein Group Accessions	Modifications	ΔCn	IonScore	Exp Value	Charge	MH+ [Da]	ΔM [ppm]	RT [min]	# Missed Cleavages
	High	SYcAEIAHNVSSK	3	1	1	P62910	C3(Carbamidomethyl)	0	71.38	3.74807e-07	2	1465.67	-1.948	24.2422	0
	High	AAQLAIR	1	1	1	P62910		0	49.72	4.53303e-05	2	742.455	-2.82668	15.8129	0
P0C0S5	Histone H2A.Z OS=Homo sapiens GN=H2AFZ PE=1 SV=2 - [H2AZ_HUMAN]	168.347	20.31	2	3	3	6	128	13.5446	10.5796
	A2	Sequence	# PSMs	# Proteins	# Protein Groups	Protein Group Accessions	Modifications	ΔCn	IonScore	Exp Value	Charge	MH+ [Da]	ΔM [ppm]	RT [min]	# Missed Cleavages
	High	AGLQFPVGR	3	2	1	P0C0S5		0	64.46	3.11544e-06	2	944.531	-0.62894	48.4785	0
	High	GDEELDSLIK	1	2	1	P0C0S5		0	46.63	0.000219443	2	1118.56	2.11238	57.3516	0
	High	HLQLAIR	2	2	1	P0C0S5		0	35.67	0.000460733	2	850.523	-2.69975	22.8343	0
P61247	40S ribosomal protein S3a OS=Homo sapiens GN=RPS3A PE=1 SV=2 - [RS3A_HUMAN]	165.487	13.26	1	4	4	6	264	29.9257	9.72998
	A2	Sequence	# PSMs	# Proteins	# Protein Groups	Protein Group Accessions	Modifications	ΔCn	IonScore	Exp Value	Charge	MH+ [Da]	ΔM [ppm]	RT [min]	# Missed Cleavages
	High	TSYAQHQQVR	1	1	1	P61247		0	66.35	1.73805e-06	2	1217.6	-4.98061	9.09907	0
	High	TTDGYLLR	1	1	1	P61247		0	57.75	1.18356e-05	2	938.496	2.32733	29.1335	0
	High	LITEDVQGK	3	1	1	P61247		0	50.5	9.84832e-05	2	1002.54	-2.40812	18.1467	0
	High	APAMFNIR	1	1	1	P61247		0	40.36	0.00092045	2	919.479	-3.15486	46.3232	0
P61254	60S ribosomal protein L26 OS=Homo sapiens GN=RPL26 PE=1 SV=1 - [RL26_HUMAN]	164.851	12.41	1	3	3	6	145	17.2475	10.5503
	A2	Sequence	# PSMs	# Proteins	# Protein Groups	Protein Group Accessions	Modifications	ΔCn	IonScore	Exp Value	Charge	MH+ [Da]	ΔM [ppm]	RT [min]	# Missed Cleavages
	High	KDDEVQVVR	1	1	1	P61254		0	78.9	1.46216e-07	2	1087.57	-4.04524	10.9032	1
	High	DDEVQVVR	2	1	1	P61254		0	49.5	9.14445e-05	2	959.474	-5.41301	17.2927	0
	High	HFNAPSHIR	3	1	1	P61254		0	42.97	0.000499615	3	1078.55	-1.90503	11.731	0
P18124	60S ribosomal protein L7 OS=Homo sapiens GN=RPL7 PE=1 SV=1 - [RL7_HUMAN]	157.145	17.74	1	5	5	6	248	29.2072	10.6528
	A2	Sequence	# PSMs	# Proteins	# Protein Groups	Protein Group Accessions	Modifications	ΔCn	IonScore	Exp Value	Charge	MH+ [Da]	ΔM [ppm]	RT [min]	# Missed Cleavages
	High	IALTDNALIAR	1	1	1	P18124		0	86.12	1.06289e-08	2	1170.69	0.807128	58.1356	0
	High	LAFVIR	2	1	1	P18124		0	41.38	8.36947e-05	2	718.461	0.488606	50.376	0
	High	SVNELIYK	1	1	1	P18124		0	39.78	0.000852089	2	965.534	3.6122	32.8651	0
	High	NFAELK	1	1	1	P18124		0	39.48	0.00105957	2	721.386	-3.33477	21.2862	0
	High	TTHFVEGGDAGNR	1	1	1	P18124		0	36.24	0.00102204	3	1360.62	-1.58747	10.7657	0
P62917	60S ribosomal protein L8 OS=Homo sapiens GN=RPL8 PE=1 SV=2 - [RL8_HUMAN]	155.921	13.23	1	3	3	5	257	28.0073	11.0337
	A2	Sequence	# PSMs	# Proteins	# Protein Groups	Protein Group Accessions	Modifications	ΔCn	IonScore	Exp Value	Charge	MH+ [Da]	ΔM [ppm]	RT [min]	# Missed Cleavages
	High	AVVGVVAGGGR	2	1	1	P62917		0	66.56	1.2696e-06	2	941.548	-5.55293	17.3372	0
	High	ASGNYATVISHNPETK	2	1	1	P62917		0	63	3.50831e-06	2	1688.82	-1.51268	24.4155	0
	High	AVDFAER	1	1	1	P62917		0	39.83	0.000805938	2	807.394	-6.35937	17.8878	0
Q9BSD7	Nucleoside-triphosphatase C1orf57 OS=Homo sapiens GN=C1orf57 PE=1 SV=1 - [CA057_HUMAN]	155.567	22.63	1	3	3	7	190	20.7001	9.53955
	A2	Sequence	# PSMs	# Proteins	# Protein Groups	Protein Group Accessions	Modifications	ΔCn	IonScore	Exp Value	Charge	MH+ [Da]	ΔM [ppm]	RT [min]	# Missed Cleavages
	High	GKPLALVEEIR	5	1	1	Q9BSD7		0	48.22	3.61586e-05	2	1224.73	-0.294604	50.7528	1
	High	IGFDVVTLSGTR	1	1	1	Q9BSD7		0	40.92	0.000477367	2	1264.69	-2.23464	76.3435	0
	High	VGQYVVDLTSFEQLALPVLR	1	1	1	Q9BSD7		0	38.83	0.000235653	2	2247.25	6.3597	112.812	0
A6NMY6	Putative annexin A2-like protein OS=Homo sapiens GN=ANXA2P2 PE=5 SV=2 - [AXA2L_HUMAN]	154.4	6.19	2	2	2	5	339	38.6348	6.94678
	A2	Sequence	# PSMs	# Proteins	# Protein Groups	Protein Group Accessions	Modifications	ΔCn	IonScore	Exp Value	Charge	MH+ [Da]	ΔM [ppm]	RT [min]	# Missed Cleavages
	High	TNQELQEINR	2	2	1	A6NMY6		0	60.31	9.31108e-06	2	1244.62	-2.76941	20.7874	0
	High	TPAQYDASELK	3	2	1	A6NMY6		0	47.65	0.000134856	2	1222.59	-6.91636	24.0349	0
Q14498	RNA-binding protein 39 OS=Homo sapiens GN=RBM39 PE=1 SV=2 - [RBM39_HUMAN]	150.594	8.3	1	3	3	5	530	59.3427	10.0962
	A2	Sequence	# PSMs	# Proteins	# Protein Groups	Protein Group Accessions	Modifications	ΔCn	IonScore	Exp Value	Charge	MH+ [Da]	ΔM [ppm]	RT [min]	# Missed Cleavages
	High	ALEQLNGFELAGR	2	1	1	Q14498		0	71.03	5.87701e-07	2	1417.74	-3.28987	72.7955	0
	High	TDASSASSFLDSDELER	1	1	1	Q14498		0	44.26	6.74951e-05	2	1829.8	-2.20415	68.6496	0
	High	GYGFITFSDSEcAK	2	1	1	Q14498	C12(Carbamidomethyl)	0	42.49	0.000166273	2	1581.7	4.68701	74.0418	0
P37840	Alpha-synuclein OS=Homo sapiens GN=SNCA PE=1 SV=1 - [SYUA_HUMAN]	149.016	30	1	3	3	6	140	14.4512	4.70361
	A2	Sequence	# PSMs	# Proteins	# Protein Groups	Protein Group Accessions	Modifications	ΔCn	IonScore	Exp Value	Charge	MH+ [Da]	ΔM [ppm]	RT [min]	# Missed Cleavages
	High	EQVTNVGGAVVTGVTAVAQK	3	1	1	P37840		0	55.08	1.35048e-05	2	1928.05	0.198291	72.9608	0
	High	EGVVHGVATVAEK	2	1	1	P37840		0	49.15	8.75654e-05	2	1295.69	-5.16559	18.2228	0
	High	EGVLYVGSK	1	1	1	P37840		0	38.08	0.00114363	2	951.511	-3.75968	25.0748	0
Q06830	Peroxiredoxin-1 OS=Homo sapiens GN=PRDX1 PE=1 SV=1 - [PRDX1_HUMAN]	146.886	23.62	1	5	5	8	199	22.0963	8.1333
	A2	Sequence	# PSMs	# Proteins	# Protein Groups	Protein Group Accessions	Modifications	ΔCn	IonScore	Exp Value	Charge	MH+ [Da]	ΔM [ppm]	RT [min]	# Missed Cleavages
	High	LVQAFQFTDK	4	1	1	Q06830		0	46.67	0.000168993	2	1196.63	-2.87493	56.7837	0
	High	QITVNDLPVGR	1	1	1	Q06830		0	42.71	0.000302725	2	1211.67	-4.19607	50.409	0
	High	SVDETLR	1	1	1	Q06830		0	40.33	0.00132073	2	819.417	-4.7041	12.3553	0
	High	ATAVMPDGQFK	1	1	1	Q06830		0	37.3	0.00147105	2	1164.57	-1.69117	32.1355	0
	High	GLFIIDDK	1	1	1	Q06830		0	35.46	0.00150756	2	920.508	-0.502896	64.135	0
P25398	40S ribosomal protein S12 OS=Homo sapiens GN=RPS12 PE=1 SV=3 - [RS12_HUMAN]	145.04	18.18	1	2	2	5	132	14.5055	7.21045
	A2	Sequence	# PSMs	# Proteins	# Protein Groups	Protein Group Accessions	Modifications	ΔCn	IonScore	Exp Value	Charge	MH+ [Da]	ΔM [ppm]	RT [min]	# Missed Cleavages
	High	LGEWVGLcK	3	1	1	P25398	C8(Carbamidomethyl)	0	52.87	4.85431e-05	2	1061.54	-3.4855	56.3945	0
	High	LVEALcAEHQINLIK	2	1	1	P25398	C6(Carbamidomethyl)	0	47.14	5.50611e-05	2	1750.96	5.49539	65.4505	0
Q7Z739	YTH domain family protein 3 OS=Homo sapiens GN=YTHDF3 PE=1 SV=1 - [YTHD3_HUMAN]	140.957	8.38	1	3	4	5	585	63.8218	9.0415
	A2	Sequence	# PSMs	# Proteins	# Protein Groups	Protein Group Accessions	Modifications	ΔCn	IonScore	Exp Value	Charge	MH+ [Da]	ΔM [ppm]	RT [min]	# Missed Cleavages
	High	AITDGQAGFGNDTLSK	2	1	1	Q7Z739		0	75.91	1.93619e-07	2	1594.76	-5.06557	41.4186	0
	High	HNMNIGTWDEK	1	1	1	Q7Z739		0	45.2	8.75786e-05	2	1344.6	-3.10609	30.699	0
	High	LENNDNKPVTNSR	1	1	1	Q7Z739		0	42.58	0.000311924	2	1500.73	-4.72534	8.87249	1
	High	SYSEDDIHR	1	2	2	Q9Y5A9;Q7Z739		0	33.67	0.00135304	2	1121.48	-3.75068	11.9024	0
P61313	60S ribosomal protein L15 OS=Homo sapiens GN=RPL15 PE=1 SV=2 - [RL15_HUMAN]	137.885	18.63	1	4	4	6	204	24.1311	11.6196
	A2	Sequence	# PSMs	# Proteins	# Protein Groups	Protein Group Accessions	Modifications	ΔCn	IonScore	Exp Value	Charge	MH+ [Da]	ΔM [ppm]	RT [min]	# Missed Cleavages
	High	YIQELWR	3	1	1	P61313		0	63.49	4.14135e-06	2	1007.53	3.28126	56.4505	0
	High	NTLQLHR	1	1	1	P61313		0	39.14	0.000963002	2	881.492	-3.36498	11.172	0
	High	VLNSYWVGEDSTYK	1	1	1	P61313		0	38.93	0.000633294	2	1660.77	-7.01002	62.4658	0
	High	RNPDTQWITK	1	1	1	P61313		0	37.81	0.00130806	2	1258.65	-1.40157	22.2686	1
Q14671	Pumilio homolog 1 OS=Homo sapiens GN=PUM1 PE=1 SV=3 - [PUM1_HUMAN]	135.428	2.78	1	3	3	4	1186	126.395	6.84424
	A2	Sequence	# PSMs	# Proteins	# Protein Groups	Protein Group Accessions	Modifications	ΔCn	IonScore	Exp Value	Charge	MH+ [Da]	ΔM [ppm]	RT [min]	# Missed Cleavages
	High	SQDDAMVDYFFQR	1	1	1	Q14671		0	73.66	7.31895e-08	2	1621.69	-2.76247	99.8774	0
	High	GIFLGDQWR	2	1	1	Q14671		0	51.95	8.39316e-05	2	1091.57	4.33272	73.6673	0
	High	DSLTGSSDLYK	1	1	1	Q14671		0	41.53	0.00039372	2	1185.56	-3.30263	33.4684	0
P46783	40S ribosomal protein S10 OS=Homo sapiens GN=RPS10 PE=1 SV=1 - [RS10_HUMAN]	133.669	13.94	1	2	2	4	165	18.8859	10.1548
	A2	Sequence	# PSMs	# Proteins	# Protein Groups	Protein Group Accessions	Modifications	ΔCn	IonScore	Exp Value	Charge	MH+ [Da]	ΔM [ppm]	RT [min]	# Missed Cleavages
	High	AEAGAGSATEFQFR	3	1	1	P46783		0	69.25	6.53676e-07	2	1441.67	-0.768579	48.9786	0
	High	IAIYELLFK	1	1	1	P46783		0	51.82	1.24955e-05	2	1109.66	1.44699	109.087	0
Q9Y2G8	DnaJ homolog subfamily C member 16 OS=Homo sapiens GN=DNAJC16 PE=2 SV=3 - [DJC16_HUMAN]	132.595	0.77	2	1	1	7	782	90.5345	7.12256
	A2	Sequence	# PSMs	# Proteins	# Protein Groups	Protein Group Accessions	Modifications	ΔCn	IonScore	Exp Value	Charge	MH+ [Da]	ΔM [ppm]	RT [min]	# Missed Cleavages
	High	FIQISK	7	2	1	Q9Y2G8		0	43.75	0.000238259	2	735.438	-2.1473	54.6627	0
P62701	40S ribosomal protein S4, X isoform OS=Homo sapiens GN=RPS4X PE=1 SV=2 - [RS4X_HUMAN]	129.831	11.41	1	3	3	3	263	29.5791	10.1548
	A2	Sequence	# PSMs	# Proteins	# Protein Groups	Protein Group Accessions	Modifications	ΔCn	IonScore	Exp Value	Charge	MH+ [Da]	ΔM [ppm]	RT [min]	# Missed Cleavages
	High	LTGVFAPR	1	1	1	P62701		0	67.04	1.79904e-06	2	860.501	2.38446	32.5426	0
	High	LSNIFVIGK	1	1	1	P62701		0	66.9	3.67513e-07	2	990.596	-2.19501	63.9873	0
	High	ERHPGSFDVVHVK	1	1	1	P62701		0	43.23	0.000370761	4	1506.78	-1.52639	24.4467	1
P12268	Inosine-5'-monophosphate dehydrogenase 2 OS=Homo sapiens GN=IMPDH2 PE=1 SV=2 - [IMDH2_HUMAN]	124.849	2.33	1	1	1	3	514	55.7696	6.90283
	A2	Sequence	# PSMs	# Proteins	# Protein Groups	Protein Group Accessions	Modifications	ΔCn	IonScore	Exp Value	Charge	MH+ [Da]	ΔM [ppm]	RT [min]	# Missed Cleavages
	High	VAQGVSGAVQDK	3	1	1	P12268		0	72.56	5.98996e-07	2	1158.61	-4.54391	11.4289	0
P10599	Thioredoxin OS=Homo sapiens GN=TXN PE=1 SV=3 - [THIO_HUMAN]	124.398	12.38	1	1	1	2	105	11.7297	4.91943
	A2	Sequence	# PSMs	# Proteins	# Protein Groups	Protein Group Accessions	Modifications	ΔCn	IonScore	Exp Value	Charge	MH+ [Da]	ΔM [ppm]	RT [min]	# Missed Cleavages
	High	TAFQEALDAAGDK	2	1	1	P10599		0	88.34	1.29701e-08	2	1336.64	-1.11406	58.7405	0
Q8N6H7	ADP-ribosylation factor GTPase-activating protein 2 OS=Homo sapiens GN=ARFGAP2 PE=1 SV=1 - [ARFG2_HUMAN]	123.963	5.37	1	1	2	4	521	56.6851	7.98682
	A2	Sequence	# PSMs	# Proteins	# Protein Groups	Protein Group Accessions	Modifications	ΔCn	IonScore	Exp Value	Charge	MH+ [Da]	ΔM [ppm]	RT [min]	# Missed Cleavages
	High	SQLDLFDDVGTFASGPPK	1	1	1	Q8N6H7		0	55.85	1.89812e-05	2	1893.92	0.0855377	104.862	0
	High	AISSDmFFGR	3	1	1	Q8N6H7	M6(Oxidation)	0.2568	55.38	9.99584e-06	2	1146.53	0.587858	50.0941	0
P23396	40S ribosomal protein S3 OS=Homo sapiens GN=RPS3 PE=1 SV=2 - [RS3_HUMAN]	119.919	10.7	1	3	3	5	243	26.6714	9.65674
	A2	Sequence	# PSMs	# Proteins	# Protein Groups	Protein Group Accessions	Modifications	ΔCn	IonScore	Exp Value	Charge	MH+ [Da]	ΔM [ppm]	RT [min]	# Missed Cleavages
	High	TEIIILATR	1	1	1	P23396		0	54.84	7.71024e-06	2	1029.63	0.924491	58.0161	0
	High	AELNEFLTR	1	1	1	P23396		0	44.56	0.000353445	2	1092.57	-2.61032	56.7459	0
	High	LLGGLAVR	3	1	1	P23396		0	38.99	0.00022082	2	798.517	-2.91885	41.2841	0
Q8N475	Follistatin-related protein 5 OS=Homo sapiens GN=FSTL5 PE=2 SV=2 - [FSTL5_HUMAN]	114.434	0.71	1	1	1	6	847	95.6901	5.94775
	A2	Sequence	# PSMs	# Proteins	# Protein Groups	Protein Group Accessions	Modifications	ΔCn	IonScore	Exp Value	Charge	MH+ [Da]	ΔM [ppm]	RT [min]	# Missed Cleavages
	High	mIKSLK	6	1	1	Q8N475	M1(Oxidation)	0	40.43	0.000511739	2	735.44	-5.00717	56.0938	1
Q9NW68	BSD domain-containing protein 1 OS=Homo sapiens GN=BSDC1 PE=2 SV=1 - [BSDC1_HUMAN]	112.126	8.6	1	3	3	4	430	47.1339	4.48779
	A2	Sequence	# PSMs	# Proteins	# Protein Groups	Protein Group Accessions	Modifications	ΔCn	IonScore	Exp Value	Charge	MH+ [Da]	ΔM [ppm]	RT [min]	# Missed Cleavages
	High	GLSDFLGVISDTFAPSPDK	1	1	1	Q9NW68		0	62.64	3.81152e-06	2	1965.99	3.67103	112.302	0
	High	EEAPTDLR	2	1	1	Q9NW68		0	52.69	2.90666e-05	2	930.449	-3.61425	14.5077	0
	High	VFELNSDSGK	1	1	1	Q9NW68		0	39.02	0.00088973	2	1095.53	-3.96152	25.1701	0
P08238	Heat shock protein HSP 90-beta OS=Homo sapiens GN=HSP90AB1 PE=1 SV=4 - [HS90B_HUMAN]	109.461	3.59	2	2	2	2	724	83.2121	5.03369
	A2	Sequence	# PSMs	# Proteins	# Protein Groups	Protein Group Accessions	Modifications	ΔCn	IonScore	Exp Value	Charge	MH+ [Da]	ΔM [ppm]	RT [min]	# Missed Cleavages
	High	ELISNASDALDK	1	1	1	P08238		0	69.24	9.5895e-07	2	1275.64	-1.91662	40.5871	0
	High	GVVDSEDLPLNISR	1	2	1	P08238		0	63.67	3.28595e-06	2	1513.78	-2.45166	70.0085	0
P62888	60S ribosomal protein L30 OS=Homo sapiens GN=RPL30 PE=1 SV=2 - [RL30_HUMAN]	108.734	10.43	1	1	1	3	115	12.7757	9.62744
	A2	Sequence	# PSMs	# Proteins	# Protein Groups	Protein Group Accessions	Modifications	ΔCn	IonScore	Exp Value	Charge	MH+ [Da]	ΔM [ppm]	RT [min]	# Missed Cleavages
	High	LVILANNcPALR	3	1	1	P62888	C8(Carbamidomethyl)	0	56.83	8.09216e-06	2	1353.76	-1.65843	58.6953	0
Q06787	Fragile X mental retardation 1 protein OS=Homo sapiens GN=FMR1 PE=1 SV=1 - [FMR1_HUMAN]	108.64	4.27	1	3	4	5	632	71.1309	7.41553
	A2	Sequence	# PSMs	# Proteins	# Protein Groups	Protein Group Accessions	Modifications	ΔCn	IonScore	Exp Value	Charge	MH+ [Da]	ΔM [ppm]	RT [min]	# Missed Cleavages
	High	VGPNAPEEK	1	1	1	Q06787		0	50.38	5.4057e-05	2	940.47	-3.30344	10.1417	0
	High	GSNGAFYK	1	3	3	Q06787;P51114;P51116		0	42.44	0.00024232	2	843.398	-1.86683	12.393	0
	High	LDVPEDLR	1	1	1	Q06787		0	37.59	0.00080994	2	956.503	-1.76888	41.825	0
	High	IKLDVPEDLR	2	1	1	Q06787		0	35.99	0.00100707	2	1197.68	-3.52204	51.8805	1
P62266	40S ribosomal protein S23 OS=Homo sapiens GN=RPS23 PE=1 SV=3 - [RS23_HUMAN]	108.539	7.69	1	1	1	2	143	15.7977	10.4917
	A2	Sequence	# PSMs	# Proteins	# Protein Groups	Protein Group Accessions	Modifications	ΔCn	IonScore	Exp Value	Charge	MH+ [Da]	ΔM [ppm]	RT [min]	# Missed Cleavages
	High	VANVSLLALYK	2	1	1	P62266		0	66.58	3.1869e-07	2	1190.72	2.27368	76.6304	0
Q9NRY5	Protein FAM114A2 OS=Homo sapiens GN=FAM114A2 PE=1 SV=3 - [F1142_HUMAN]	106.903	5.35	1	2	2	3	505	55.4642	4.88135
	A2	Sequence	# PSMs	# Proteins	# Protein Groups	Protein Group Accessions	Modifications	ΔCn	IonScore	Exp Value	Charge	MH+ [Da]	ΔM [ppm]	RT [min]	# Missed Cleavages
	High	TSNEVTVETDKK	1	1	1	Q9NRY5		0	77.52	1.5577e-07	2	1350.67	-3.46477	9.91261	1
	High	SILNSLSGEELETLK	2	1	1	Q9NRY5		0	41.58	0.000465666	2	1632.87	0.8572	92.3877	0
P27824	Calnexin OS=Homo sapiens GN=CANX PE=1 SV=2 - [CALX_HUMAN]	102.248	4.9	1	2	2	3	592	67.5259	4.60205
	A2	Sequence	# PSMs	# Proteins	# Protein Groups	Protein Group Accessions	Modifications	ΔCn	IonScore	Exp Value	Charge	MH+ [Da]	ΔM [ppm]	RT [min]	# Missed Cleavages
	High	GTLSGWILSK	2	1	1	P27824		0	69.71	5.66599e-07	2	1061.6	-1.70096	74.6884	0
	High	IPDPEAVKPDDWDEDAPAK	1	1	1	P27824		0	35.48	0.00124581	3	2107.99	3.43912	56.6764	1
P01842	Ig lambda chain C regions OS=Homo sapiens GN=IGLC1 PE=1 SV=1 - [LAC_HUMAN]	99.3442	28.57	1	2	2	2	105	11.2295	7.23975
	A2	Sequence	# PSMs	# Proteins	# Protein Groups	Protein Group Accessions	Modifications	ΔCn	IonScore	Exp Value	Charge	MH+ [Da]	ΔM [ppm]	RT [min]	# Missed Cleavages
	High	SYScQVTHEGSTVEK	1	1	1	P01842	C4(Carbamidomethyl)	0	82.05	2.18307e-08	2	1711.75	-3.65591	13.7034	0
	High	YAASSYLSLTPEQWK	1	1	1	P01842		0	41.97	0.000400258	2	1743.86	-1.92387	86.3308	0
Q99700	Ataxin-2 OS=Homo sapiens GN=ATXN2 PE=1 SV=2 - [ATX2_HUMAN]	99.1341	2.59	1	2	2	2	1313	140.196	9.56885
	A2	Sequence	# PSMs	# Proteins	# Protein Groups	Protein Group Accessions	Modifications	ΔCn	IonScore	Exp Value	Charge	MH+ [Da]	ΔM [ppm]	RT [min]	# Missed Cleavages
	High	GPEVTSQGVQTSSPAcK	1	1	1	Q99700	C16(Carbamidomethyl)	0	84.92	1.8038e-08	2	1732.82	-0.94529	18.7329	0
	High	TSPSGGTWSSVVSGVPR	1	1	1	Q99700		0	39.25	0.000980514	2	1660.83	2.36751	62.425	0
P46782	40S ribosomal protein S5 OS=Homo sapiens GN=RPS5 PE=1 SV=4 - [RS5_HUMAN]	97.3	7.35	1	1	1	1	204	22.8621	9.71533
	A2	Sequence	# PSMs	# Proteins	# Protein Groups	Protein Group Accessions	Modifications	ΔCn	IonScore	Exp Value	Charge	MH+ [Da]	ΔM [ppm]	RT [min]	# Missed Cleavages
	High	TIAEcLADELINAAK	1	1	1	P46782	C5(Carbamidomethyl)	0	97.3	1.52691e-09	2	1631.84	2.76469	110.09	0
Q7Z2W4	Zinc finger CCCH-type antiviral protein 1 OS=Homo sapiens GN=ZC3HAV1 PE=1 SV=3 - [ZCCHV_HUMAN]	96.2813	3.66	1	2	2	2	902	101.367	8.39697
	A2	Sequence	# PSMs	# Proteins	# Protein Groups	Protein Group Accessions	Modifications	ΔCn	IonScore	Exp Value	Charge	MH+ [Da]	ΔM [ppm]	RT [min]	# Missed Cleavages
	High	ATDLGGTSQAGTSQR	1	1	1	Q7Z2W4		0	81.86	5.63659e-08	2	1449.69	-3.34929	11.0193	0
	High	VALVNDSLSDVTSTTSSR	1	1	1	Q7Z2W4		0	38.56	0.001017	2	1851.92	-2.51037	60.9543	0
O14503	Class E basic helix-loop-helix protein 40 OS=Homo sapiens GN=BHLHE40 PE=1 SV=1 - [BHE40_HUMAN]	95.6971	2.91	1	1	1	2	412	45.4812	8.104
	A2	Sequence	# PSMs	# Proteins	# Protein Groups	Protein Group Accessions	Modifications	ΔCn	IonScore	Exp Value	Charge	MH+ [Da]	ΔM [ppm]	RT [min]	# Missed Cleavages
	High	VVSELLQGGTSR	2	1	1	O14503		0	69.49	9.27799e-07	2	1245.68	0.142845	34.8803	0
Q99832	T-complex protein 1 subunit eta OS=Homo sapiens GN=CCT7 PE=1 SV=2 - [TCPH_HUMAN]	90.0278	4.24	1	2	2	3	543	59.3289	7.6499
	A2	Sequence	# PSMs	# Proteins	# Protein Groups	Protein Group Accessions	Modifications	ΔCn	IonScore	Exp Value	Charge	MH+ [Da]	ΔM [ppm]	RT [min]	# Missed Cleavages
	High	QLcDNAGFDATNILNK	1	1	1	Q99832	C3(Carbamidomethyl)	0	62.2	3.79613e-06	2	1793.85	-0.245896	71.341	0
	High	ALEIIPR	2	1	1	Q99832		0	37.12	0.000397882	2	811.502	-2.12151	41.5662	0
Q9Y224	UPF0568 protein C14orf166 OS=Homo sapiens GN=C14orf166 PE=1 SV=1 - [CN166_HUMAN]	89.2174	9.43	1	2	2	2	244	28.0507	6.65381
	A2	Sequence	# PSMs	# Proteins	# Protein Groups	Protein Group Accessions	Modifications	ΔCn	IonScore	Exp Value	Charge	MH+ [Da]	ΔM [ppm]	RT [min]	# Missed Cleavages
	High	QEAIDWLLGLAVR	1	1	1	Q9Y224		0	63.93	1.63853e-06	2	1483.84	5.59989	111.988	0
	High	NFIVWLEDQK	1	1	1	Q9Y224		0	50.73	6.55091e-05	2	1291.67	2.71521	103.872	0
P30041	Peroxiredoxin-6 OS=Homo sapiens GN=PRDX6 PE=1 SV=3 - [PRDX6_HUMAN]	86.063	16.96	1	2	2	3	224	25.0192	6.37939
	A2	Sequence	# PSMs	# Proteins	# Protein Groups	Protein Group Accessions	Modifications	ΔCn	IonScore	Exp Value	Charge	MH+ [Da]	ΔM [ppm]	RT [min]	# Missed Cleavages
	High	PGGLLLGDVAPNFEANTTVGR	2	1	1	P30041		0	48.69	5.40829e-05	2	2098.1	3.1226	96.6956	0
	High	LIALSIDSVEDHLAWSK	1	1	1	P30041		0	41.91	0.000331747	2	1897.01	1.92946	102.062	0
P32969	60S ribosomal protein L9 OS=Homo sapiens GN=RPL9 PE=1 SV=1 - [RL9_HUMAN]	85.2413	15.1	1	2	2	2	192	21.8498	9.94971
	A2	Sequence	# PSMs	# Proteins	# Protein Groups	Protein Group Accessions	Modifications	ΔCn	IonScore	Exp Value	Charge	MH+ [Da]	ΔM [ppm]	RT [min]	# Missed Cleavages
	High	FLDGIYVSEK	1	1	1	P32969		0	55.69	1.5512e-05	2	1170.6	-0.615193	62.1741	0
	High	TILSNQTVDIPENVDITLK	1	1	1	P32969		0	53.8	1.31314e-05	2	2113.14	-0.144793	93.4341	0
O15321	Transmembrane 9 superfamily member 1 OS=Homo sapiens GN=TM9SF1 PE=2 SV=2 - [TM9S1_HUMAN]	82.99	1.82	1	1	1	1	606	68.8163	7.1665
	A2	Sequence	# PSMs	# Proteins	# Protein Groups	Protein Group Accessions	Modifications	ΔCn	IonScore	Exp Value	Charge	MH+ [Da]	ΔM [ppm]	RT [min]	# Missed Cleavages
	High	AGDPVILYVNK	1	1	1	O15321		0	82.99	3.61687e-08	2	1188.66	-0.163483	50.5112	0
P29558	RNA-binding motif, single-stranded-interacting protein 1 OS=Homo sapiens GN=RBMS1 PE=1 SV=3 - [RBMS1_HUMAN]	80.3286	5.17	2	2	2	3	406	44.4769	8.79248
	A2	Sequence	# PSMs	# Proteins	# Protein Groups	Protein Group Accessions	Modifications	ΔCn	IonScore	Exp Value	Charge	MH+ [Da]	ΔM [ppm]	RT [min]	# Missed Cleavages
	High	GYGFVDFDSPAAAQK	2	2	1	P29558		0	51.21	5.25999e-05	2	1572.74	1.62134	70.7282	0
	High	TNLYIR	1	2	1	P29558		0	45.9	0.000226195	2	779.439	-2.59014	22.3797	0
P46776	60S ribosomal protein L27a OS=Homo sapiens GN=RPL27A PE=1 SV=2 - [RL27A_HUMAN]	79.9756	14.19	1	2	2	2	148	16.551	11.0044
	A2	Sequence	# PSMs	# Proteins	# Protein Groups	Protein Group Accessions	Modifications	ΔCn	IonScore	Exp Value	Charge	MH+ [Da]	ΔM [ppm]	RT [min]	# Missed Cleavages
	High	TGAAPIIDVVR	1	1	1	P46776		0	56.47	7.10085e-06	2	1111.65	-0.247548	50.466	0
	High	LWTLVSEQTR	1	1	1	P46776		0	48.81	0.000122974	2	1232.66	-2.99818	61.1746	0
P61026	Ras-related protein Rab-10 OS=Homo sapiens GN=RAB10 PE=1 SV=1 - [RAB10_HUMAN]	77.91	6	1	1	1	1	200	22.5266	8.38232
	A2	Sequence	# PSMs	# Proteins	# Protein Groups	Protein Group Accessions	Modifications	ΔCn	IonScore	Exp Value	Charge	MH+ [Da]	ΔM [ppm]	RT [min]	# Missed Cleavages
	High	NIDEHANEDVER	1	1	1	P61026		0	77.91	4.61153e-08	2	1440.63	-3.88661	11.6557	0
O60506	Heterogeneous nuclear ribonucleoprotein Q OS=Homo sapiens GN=SYNCRIP PE=1 SV=2 - [HNRPQ_HUMAN]	77.2509	3.37	1	2	2	2	623	69.5596	8.5874
	A2	Sequence	# PSMs	# Proteins	# Protein Groups	Protein Group Accessions	Modifications	ΔCn	IonScore	Exp Value	Charge	MH+ [Da]	ΔM [ppm]	RT [min]	# Missed Cleavages
	High	DLFEDELVPLFEK	1	1	1	O60506		0	61.8	5.97928e-06	2	1593.81	1.52164	111.437	0
	High	AGPIWDLR	1	1	1	O60506		0	40.63	0.000605478	2	927.503	-1.89111	62.7163	0
Q9UK39	Nocturnin OS=Homo sapiens GN=CCRN4L PE=2 SV=2 - [NOCT_HUMAN]	77.152	4.41	1	1	1	2	431	48.1652	7.2251
	A2	Sequence	# PSMs	# Proteins	# Protein Groups	Protein Group Accessions	Modifications	ΔCn	IonScore	Exp Value	Charge	MH+ [Da]	ΔM [ppm]	RT [min]	# Missed Cleavages
	High	SAQGcDLLQNLQNITQGAK	2	1	1	Q9UK39	C5(Carbamidomethyl)	0	51.77	4.09143e-05	2	2059.02	-1.91465	97.7502	0
Q02543	60S ribosomal protein L18a OS=Homo sapiens GN=RPL18A PE=1 SV=2 - [RL18A_HUMAN]	76.9431	11.93	1	2	2	3	176	20.7489	10.7114
	A2	Sequence	# PSMs	# Proteins	# Protein Groups	Protein Group Accessions	Modifications	ΔCn	IonScore	Exp Value	Charge	MH+ [Da]	ΔM [ppm]	RT [min]	# Missed Cleavages
	High	NFGIWLR	2	1	1	Q02543		0	47.88	0.000114865	2	905.501	2.03633	78.0348	0
	High	SSGEIVYcGQVFEK	1	1	1	Q02543	C8(Carbamidomethyl)	0	40.97	0.000379921	2	1602.74	-1.91752	55.351	0
Q9NVJ2	ADP-ribosylation factor-like protein 8B OS=Homo sapiens GN=ARL8B PE=1 SV=1 - [ARL8B_HUMAN]	76.8252	9.68	1	2	2	2	186	21.5251	8.42627
	A2	Sequence	# PSMs	# Proteins	# Protein Groups	Protein Group Accessions	Modifications	ΔCn	IonScore	Exp Value	Charge	MH+ [Da]	ΔM [ppm]	RT [min]	# Missed Cleavages
	High	MNLSAIQDR	1	1	1	Q9NVJ2		0	63.44	4.12137e-06	2	1047.52	-3.86201	34.7967	0
	High	DLPNALDEK	1	1	1	Q9NVJ2		0	40.03	0.00059587	2	1014.51	-1.65477	32.8317	0
Q16890	Tumor protein D53 OS=Homo sapiens GN=TPD52L1 PE=1 SV=1 - [TPD53_HUMAN]	76.2345	6.86	1	1	1	2	204	22.4351	5.61768
	A2	Sequence	# PSMs	# Proteins	# Protein Groups	Protein Group Accessions	Modifications	ΔCn	IonScore	Exp Value	Charge	MH+ [Da]	ΔM [ppm]	RT [min]	# Missed Cleavages
	High	ATAAFSNVGTAISK	2	1	1	Q16890		0	52.67	4.299e-05	2	1337.7	-4.50215	39.0248	0
P46779	60S ribosomal protein L28 OS=Homo sapiens GN=RPL28 PE=1 SV=3 - [RL28_HUMAN]	76.0951	13.87	1	2	2	2	137	15.7377	12.0151
	A2	Sequence	# PSMs	# Proteins	# Protein Groups	Protein Group Accessions	Modifications	ΔCn	IonScore	Exp Value	Charge	MH+ [Da]	ΔM [ppm]	RT [min]	# Missed Cleavages
	High	TVGVEPAADGK	1	1	1	P46779		0	56.66	1.51042e-05	2	1043.53	-3.19725	11.4808	0
	High	NcSSFLIK	1	1	1	P46779	C2(Carbamidomethyl)	0	44.47	0.000234014	2	968.491	3.75108	33.783	0
P61353	60S ribosomal protein L27 OS=Homo sapiens GN=RPL27 PE=1 SV=2 - [RL27_HUMAN]	75.7461	12.5	1	2	2	3	136	15.7877	10.5649
	A2	Sequence	# PSMs	# Proteins	# Protein Groups	Protein Group Accessions	Modifications	ΔCn	IonScore	Exp Value	Charge	MH+ [Da]	ΔM [ppm]	RT [min]	# Missed Cleavages
	High	YSVDIPLDK	1	1	1	P61353		0	43.77	0.000381981	2	1049.55	-2.97836	52.828	0
	High	VVLVLAGR	2	1	1	P61353		0	40.3	0.000158653	2	826.549	-2.36345	39.0998	0
P01834	Ig kappa chain C region OS=Homo sapiens GN=IGKC PE=1 SV=1 - [IGKC_HUMAN]	75.1381	18.87	1	1	1	2	106	11.6017	5.87158
	A2	Sequence	# PSMs	# Proteins	# Protein Groups	Protein Group Accessions	Modifications	ΔCn	IonScore	Exp Value	Charge	MH+ [Da]	ΔM [ppm]	RT [min]	# Missed Cleavages
	High	VDNALQSGNSQESVTEQDSK	2	1	1	P01834		0	62.26	1.81259e-06	2	2135.97	-1.60661	21.4525	0
Q8NCA5	Protein FAM98A OS=Homo sapiens GN=FAM98A PE=1 SV=1 - [FA98A_HUMAN]	73.7966	6.94	1	2	2	2	519	55.3663	9.02686
	A2	Sequence	# PSMs	# Proteins	# Protein Groups	Protein Group Accessions	Modifications	ΔCn	IonScore	Exp Value	Charge	MH+ [Da]	ΔM [ppm]	RT [min]	# Missed Cleavages
	High	HQGGWTDGGSGGGGGYQDGGYR	1	1	1	Q8NCA5		0	53.72	2.54772e-06	3	2125.87	-2.15782	24.6694	0
	High	AQEGGGSEVFQELK	1	1	1	Q8NCA5		0	40.94	0.000511415	2	1478.71	-2.91333	49.1033	0
P62277	40S ribosomal protein S13 OS=Homo sapiens GN=RPS13 PE=1 SV=2 - [RS13_HUMAN]	73.43	7.95	1	1	1	1	151	17.2117	10.5356
	A2	Sequence	# PSMs	# Proteins	# Protein Groups	Protein Group Accessions	Modifications	ΔCn	IonScore	Exp Value	Charge	MH+ [Da]	ΔM [ppm]	RT [min]	# Missed Cleavages
	High	GLTPSQIGVILR	1	1	1	P62277		0	73.43	8.39792e-08	2	1253.76	2.49528	75.892	0
Q96F86	Enhancer of mRNA-decapping protein 3 OS=Homo sapiens GN=EDC3 PE=1 SV=1 - [EDC3_HUMAN]	73.0369	5.71	1	2	2	2	508	56.0424	7.10791
	A2	Sequence	# PSMs	# Proteins	# Protein Groups	Protein Group Accessions	Modifications	ΔCn	IonScore	Exp Value	Charge	MH+ [Da]	ΔM [ppm]	RT [min]	# Missed Cleavages
	High	KPASSSSAPQNIPK	1	1	1	Q96F86		0	54.34	2.30081e-05	2	1411.75	-3.42709	10.1553	1
	High	SQDVAVSPQQQQcSK	1	1	1	Q96F86	C13(Carbamidomethyl)	0	42.13	0.000223508	2	1689.78	-3.44084	11.6619	0
Q8NEY1	Neuron navigator 1 OS=Homo sapiens GN=NAV1 PE=1 SV=2 - [NAV1_HUMAN]	71.5913	0.64	1	1	1	2	1877	202.347	8.07471
	A2	Sequence	# PSMs	# Proteins	# Protein Groups	Protein Group Accessions	Modifications	ΔCn	IonScore	Exp Value	Charge	MH+ [Da]	ΔM [ppm]	RT [min]	# Missed Cleavages
	High	AVALDSDNISLK	2	1	1	Q8NEY1		0	52.78	5.14049e-05	2	1245.67	-1.32747	48.378	0
P62244	40S ribosomal protein S15a OS=Homo sapiens GN=RPS15A PE=1 SV=2 - [RS15A_HUMAN]	70.7107	6.15	1	1	1	2	130	14.83	10.1255
	A2	Sequence	# PSMs	# Proteins	# Protein Groups	Protein Group Accessions	Modifications	ΔCn	IonScore	Exp Value	Charge	MH+ [Da]	ΔM [ppm]	RT [min]	# Missed Cleavages
	High	IVVNLTGR	2	1	1	P62244		0	55.75	2.96671e-05	2	871.533	-3.249	33.5985	0
P40227	T-complex protein 1 subunit zeta OS=Homo sapiens GN=CCT6A PE=1 SV=3 - [TCPZ_HUMAN]	70.6463	5.84	1	2	2	2	531	57.9876	6.68311
	A2	Sequence	# PSMs	# Proteins	# Protein Groups	Protein Group Accessions	Modifications	ΔCn	IonScore	Exp Value	Charge	MH+ [Da]	ΔM [ppm]	RT [min]	# Missed Cleavages
	High	VHAELADVLTEAVVDSILAIK	1	1	1	P40227		0	55.17	4.25724e-06	3	2206.23	0.232686	115.099	0
	High	IITEGFEAAK	1	1	1	P40227		0	38.8	0.00111393	2	1078.58	-1.50175	33.195	0
P51149	Ras-related protein Rab-7a OS=Homo sapiens GN=RAB7A PE=1 SV=1 - [RAB7A_HUMAN]	68.2312	4.83	1	1	1	2	207	23.4748	6.69775
	A2	Sequence	# PSMs	# Proteins	# Protein Groups	Protein Group Accessions	Modifications	ΔCn	IonScore	Exp Value	Charge	MH+ [Da]	ΔM [ppm]	RT [min]	# Missed Cleavages
	High	DEFLIQASPR	2	1	1	P51149		0	52.43	5.94338e-05	2	1175.61	0.472437	52.5717	0
Q00535	Cell division protein kinase 5 OS=Homo sapiens GN=CDK5 PE=1 SV=3 - [CDK5_HUMAN]	67.2185	2.74	28	1	1	2	292	33.2832	7.66455
	A2	Sequence	# PSMs	# Proteins	# Protein Groups	Protein Group Accessions	Modifications	ΔCn	IonScore	Exp Value	Charge	MH+ [Da]	ΔM [ppm]	RT [min]	# Missed Cleavages
	High	LADFGLAR	2	28	1	Q00535		0	50.67	0.000113558	2	862.482	4.1227	44.0383	0
P18077	60S ribosomal protein L35a OS=Homo sapiens GN=RPL35A PE=1 SV=2 - [RL35A_HUMAN]	66.5356	8.18	1	1	1	3	110	12.5298	11.063
	A2	Sequence	# PSMs	# Proteins	# Protein Groups	Protein Group Accessions	Modifications	ΔCn	IonScore	Exp Value	Charge	MH+ [Da]	ΔM [ppm]	RT [min]	# Missed Cleavages
	High	DETEFYLGK	3	1	1	P18077		0	38.13	0.000492209	2	1101.51	-3.97686	50.6596	0
Q9NR31	GTP-binding protein SAR1a OS=Homo sapiens GN=SAR1A PE=1 SV=1 - [SAR1A_HUMAN]	65.9315	11.62	1	2	2	2	198	22.3525	6.68311
	A2	Sequence	# PSMs	# Proteins	# Protein Groups	Protein Group Accessions	Modifications	ΔCn	IonScore	Exp Value	Charge	MH+ [Da]	ΔM [ppm]	RT [min]	# Missed Cleavages
	High	EIFGLYGQTTGK	1	1	1	Q9NR31		0	45	0.000230846	2	1313.68	2.22275	59.4129	0
	High	LVFLGLDNAGK	1	1	1	Q9NR31		0	41.88	0.000321074	2	1146.65	-2.46625	72.5461	0
P28799	Granulins OS=Homo sapiens GN=GRN PE=1 SV=2 - [GRN_HUMAN]	65.58	2.53	1	1	1	3	593	63.4998	6.82959
	A2	Sequence	# PSMs	# Proteins	# Protein Groups	Protein Group Accessions	Modifications	ΔCn	IonScore	Exp Value	Charge	MH+ [Da]	ΔM [ppm]	RT [min]	# Missed Cleavages
	High	cDMEVScPDGYTccR	3	1	1	P28799	C1(Carbamidomethyl); C7(Carbamidomethyl); C13(Carbamidomethyl); C14(Carbamidomethyl)	0	36.9	6.51808e-05	2	1909.66	-1.55254	36.1273	0
P62854	40S ribosomal protein S26 OS=Homo sapiens GN=RPS26 PE=1 SV=3 - [RS26_HUMAN]	62.9606	20.87	1	2	2	2	115	13.0071	11.0044
	A2	Sequence	# PSMs	# Proteins	# Protein Groups	Protein Group Accessions	Modifications	ΔCn	IonScore	Exp Value	Charge	MH+ [Da]	ΔM [ppm]	RT [min]	# Missed Cleavages
	High	DISEASVFDAYVLPK	1	1	1	P62854		0	52.53	4.60738e-05	2	1653.84	2.12987	104.62	0
	High	NIVEAAAVR	1	1	1	P62854		0	36.77	0.00120967	2	942.536	-0.875329	23.8202	0
P08708	40S ribosomal protein S17 OS=Homo sapiens GN=RPS17 PE=1 SV=2 - [RS17_HUMAN]	61.2059	15.56	1	2	2	2	135	15.5404	9.84717
	A2	Sequence	# PSMs	# Proteins	# Protein Groups	Protein Group Accessions	Modifications	ΔCn	IonScore	Exp Value	Charge	MH+ [Da]	ΔM [ppm]	RT [min]	# Missed Cleavages
	High	VcEEIAIIPSK	1	1	1	P08708	C2(Carbamidomethyl)	0	45.25	0.000273163	2	1258.67	-2.92947	50.437	0
	High	IAGYVTHLMK	1	1	1	P08708		0	43.7	0.000422314	2	1132.61	-4.45205	35.1318	0
P61978	Heterogeneous nuclear ribonucleoprotein K OS=Homo sapiens GN=HNRNPK PE=1 SV=1 - [HNRPK_HUMAN]	60.8115	2.38	1	1	1	2	463	50.9444	5.5415
	A2	Sequence	# PSMs	# Proteins	# Protein Groups	Protein Group Accessions	Modifications	ΔCn	IonScore	Exp Value	Charge	MH+ [Da]	ΔM [ppm]	RT [min]	# Missed Cleavages
	High	IDEPLEGSEDR	2	1	1	P61978		0	46.25	7.82553e-05	2	1259.58	1.10538	23.873	0
P62805	Histone H4 OS=Homo sapiens GN=HIST1H4A PE=1 SV=2 - [H4_HUMAN]	60.0815	9.71	1	1	1	2	103	11.3604	11.356
	A2	Sequence	# PSMs	# Proteins	# Protein Groups	Protein Group Accessions	Modifications	ΔCn	IonScore	Exp Value	Charge	MH+ [Da]	ΔM [ppm]	RT [min]	# Missed Cleavages
	High	ISGLIYEETR	2	1	1	P62805		0	42.45	0.000398197	2	1180.62	-0.805216	44.9207	0
O15372	Eukaryotic translation initiation factor 3 subunit H OS=Homo sapiens GN=EIF3H PE=1 SV=1 - [EIF3H_HUMAN]	59.98	5.4	1	1	1	1	352	39.9051	6.53662
	A2	Sequence	# PSMs	# Proteins	# Protein Groups	Protein Group Accessions	Modifications	ΔCn	IonScore	Exp Value	Charge	MH+ [Da]	ΔM [ppm]	RT [min]	# Missed Cleavages
	High	EGTGSTATSSSSTAGAAGK	1	1	1	O15372		0	59.98	3.36546e-06	2	1627.73	-5.24536	9.15459	0
O95292	Vesicle-associated membrane protein-associated protein B/C OS=Homo sapiens GN=VAPB PE=1 SV=3 - [VAPB_HUMAN]	59.5	4.94	2	1	1	1	243	27.2111	7.29834
	A2	Sequence	# PSMs	# Proteins	# Protein Groups	Protein Group Accessions	Modifications	ΔCn	IonScore	Exp Value	Charge	MH+ [Da]	ΔM [ppm]	RT [min]	# Missed Cleavages
	High	GPFTDVVTTNLK	1	2	1	O95292		0	59.5	8.30294e-06	2	1291.68	-3.43679	62.665	0
Q9Y383	Putative RNA-binding protein Luc7-like 2 OS=Homo sapiens GN=LUC7L2 PE=1 SV=2 - [LC7L2_HUMAN]	59.15	3.83	1	1	1	1	392	46.4856	10.0083
	A2	Sequence	# PSMs	# Proteins	# Protein Groups	Protein Group Accessions	Modifications	ΔCn	IonScore	Exp Value	Charge	MH+ [Da]	ΔM [ppm]	RT [min]	# Missed Cleavages
	High	VEQLGAEGNVEESQK	1	1	1	Q9Y383		0	59.15	7.11469e-06	2	1616.77	-3.17642	20.753	0
P60866	40S ribosomal protein S20 OS=Homo sapiens GN=RPS20 PE=1 SV=1 - [RS20_HUMAN]	58.6018	15.13	1	2	2	2	119	13.3643	9.93506
	A2	Sequence	# PSMs	# Proteins	# Protein Groups	Protein Group Accessions	Modifications	ΔCn	IonScore	Exp Value	Charge	MH+ [Da]	ΔM [ppm]	RT [min]	# Missed Cleavages
	High	TPVEPEVAIHR	1	1	1	P60866		0	43.51	0.000372123	3	1247.68	2.42048	23.5772	0
	High	VcADLIR	1	1	1	P60866	C2(Carbamidomethyl)	0	43	0.000586389	2	846.447	-3.53609	23.6304	0
P49207	60S ribosomal protein L34 OS=Homo sapiens GN=RPL34 PE=1 SV=3 - [RL34_HUMAN]	58.2191	15.38	1	2	2	2	117	13.2845	11.4731
	A2	Sequence	# PSMs	# Proteins	# Protein Groups	Protein Group Accessions	Modifications	ΔCn	IonScore	Exp Value	Charge	MH+ [Da]	ΔM [ppm]	RT [min]	# Missed Cleavages
	High	LSYNTASNK	1	1	1	P49207		0	45.04	0.000202097	2	997.493	-2.38701	11	0
	High	SAcGVcPGR	1	1	1	P49207	C3(Carbamidomethyl); C6(Carbamidomethyl)	0	37.67	0.000692556	2	963.411	-2.77562	9.85464	0
P48634	Large proline-rich protein BAT2 OS=Homo sapiens GN=BAT2 PE=1 SV=2 - [BAT2_HUMAN]	58.15	0.6	1	1	1	1	2157	228.721	9.46631
	A2	Sequence	# PSMs	# Proteins	# Protein Groups	Protein Group Accessions	Modifications	ΔCn	IonScore	Exp Value	Charge	MH+ [Da]	ΔM [ppm]	RT [min]	# Missed Cleavages
	High	GVGSGGQGPPPPR	1	1	1	P48634		0	58.15	1.70716e-05	2	1162.59	-3.62175	10.3465	0
P35268	60S ribosomal protein L22 OS=Homo sapiens GN=RPL22 PE=1 SV=2 - [RL22_HUMAN]	57.96	8.59	1	1	1	1	128	14.7778	9.18799
	A2	Sequence	# PSMs	# Proteins	# Protein Groups	Protein Group Accessions	Modifications	ΔCn	IonScore	Exp Value	Charge	MH+ [Da]	ΔM [ppm]	RT [min]	# Missed Cleavages
	High	ITVTSEVPFSK	1	1	1	P35268		0	57.96	1.31164e-05	2	1207.65	-3.65824	51.6098	0
P52948	Nuclear pore complex protein Nup98-Nup96 OS=Homo sapiens GN=NUP98 PE=1 SV=3 - [NUP98_HUMAN]	57.4618	1.45	1	2	2	2	1729	187.673	6.34131
	A2	Sequence	# PSMs	# Proteins	# Protein Groups	Protein Group Accessions	Modifications	ΔCn	IonScore	Exp Value	Charge	MH+ [Da]	ΔM [ppm]	RT [min]	# Missed Cleavages
	High	LEDYQANR	1	1	1	P52948		0	42.78	0.000400695	2	1008.47	-1.69105	11.6473	0
	High	DSENLASPSEYPENGER	1	1	1	P52948		0	35.12	0.000384512	2	1893.8	-4.72724	33.6218	0
P62263	40S ribosomal protein S14 OS=Homo sapiens GN=RPS14 PE=1 SV=3 - [RS14_HUMAN]	56.8964	15.89	1	2	2	2	151	16.2625	10.0522
	A2	Sequence	# PSMs	# Proteins	# Protein Groups	Protein Group Accessions	Modifications	ΔCn	IonScore	Exp Value	Charge	MH+ [Da]	ΔM [ppm]	RT [min]	# Missed Cleavages
	High	TPGPGAQSALR	1	1	1	P62263		0	42.35	0.000465683	2	1054.56	-2.80548	14.2503	0
	High	IEDVTPIPSDSTR	1	1	1	P62263		0	39.21	0.000833652	2	1429.71	-3.76709	35.2791	0
Q6Y7W6	PERQ amino acid-rich with GYF domain-containing protein 2 OS=Homo sapiens GN=GIGYF2 PE=1 SV=1 - [PERQ2_HUMAN]	55.52	1.08	1	1	1	1	1299	149.978	5.5415
	A2	Sequence	# PSMs	# Proteins	# Protein Groups	Protein Group Accessions	Modifications	ΔCn	IonScore	Exp Value	Charge	MH+ [Da]	ΔM [ppm]	RT [min]	# Missed Cleavages
	High	LQQQQQQQQLAQMK	1	1	1	Q6Y7W6		0	55.52	1.7534e-05	2	1727.88	-4.16908	21.5275	0
Q96PU8	Protein quaking OS=Homo sapiens GN=QKI PE=1 SV=1 - [QKI_HUMAN]	54.9391	2.93	1	1	1	2	341	37.6467	8.55811
	A2	Sequence	# PSMs	# Proteins	# Protein Groups	Protein Group Accessions	Modifications	ΔCn	IonScore	Exp Value	Charge	MH+ [Da]	ΔM [ppm]	RT [min]	# Missed Cleavages
	High	EYPDFNFVGR	2	1	1	Q96PU8		0	39.97	0.000453119	2	1243.58	3.04704	73.8138	0
P26196	Probable ATP-dependent RNA helicase DDX6 OS=Homo sapiens GN=DDX6 PE=1 SV=2 - [DDX6_HUMAN]	54.62	4.97	1	1	1	1	483	54.3823	8.66064
	A2	Sequence	# PSMs	# Proteins	# Protein Groups	Protein Group Accessions	Modifications	ΔCn	IonScore	Exp Value	Charge	MH+ [Da]	ΔM [ppm]	RT [min]	# Missed Cleavages
	High	GPVKPTGGPGGGGTQTQQQMNQLK	1	1	1	P26196		0	54.62	1.62218e-05	3	2366.19	0.0106814	22.011	1
P17987	T-complex protein 1 subunit alpha OS=Homo sapiens GN=TCP1 PE=1 SV=1 - [TCPA_HUMAN]	54.3244	3.6	1	2	2	2	556	60.3056	6.11279
	A2	Sequence	# PSMs	# Proteins	# Protein Groups	Protein Group Accessions	Modifications	ΔCn	IonScore	Exp Value	Charge	MH+ [Da]	ΔM [ppm]	RT [min]	# Missed Cleavages
	High	IcDDELILIK	1	1	1	P17987	C2(Carbamidomethyl)	0	40.71	0.000904377	2	1231.66	-2.37003	72.6711	0
	High	YPVNSVNILK	1	1	1	P17987		0	40	0.000455	2	1146.65	1.39241	51.1439	0
Q6P3W7	SCY1-like protein 2 OS=Homo sapiens GN=SCYL2 PE=1 SV=1 - [SCYL2_HUMAN]	53.6738	1.51	1	1	1	2	929	103.642	8.22119
	A2	Sequence	# PSMs	# Proteins	# Protein Groups	Protein Group Accessions	Modifications	ΔCn	IonScore	Exp Value	Charge	MH+ [Da]	ΔM [ppm]	RT [min]	# Missed Cleavages
	High	LGSSSLTNIPEEVR	2	1	1	Q6P3W7		0	42.44	0.000467535	2	1501.78	-3.11486	57.8343	0
P62899	60S ribosomal protein L31 OS=Homo sapiens GN=RPL31 PE=1 SV=1 - [RL31_HUMAN]	53.62	7.2	1	1	1	1	125	14.4539	10.5356
	A2	Sequence	# PSMs	# Proteins	# Protein Groups	Protein Group Accessions	Modifications	ΔCn	IonScore	Exp Value	Charge	MH+ [Da]	ΔM [ppm]	RT [min]	# Missed Cleavages
	High	SAINEVVTR	1	1	1	P62899		0	53.62	6.2135e-05	2	988.538	-4.63922	22.3151	0
O43790	Keratin, type II cuticular Hb6 OS=Homo sapiens GN=KRT86 PE=1 SV=1 - [KRT86_HUMAN]	53.5738	5.56	3	1	2	2	486	53.4663	5.65576
	A2	Sequence	# PSMs	# Proteins	# Protein Groups	Protein Group Accessions	Modifications	ΔCn	IonScore	Exp Value	Charge	MH+ [Da]	ΔM [ppm]	RT [min]	# Missed Cleavages
	High	FLEQQNK	1	8	5	P13647;P05787;O43790;P08670;P08729		0	40.44	0.00123348	2	906.465	-2.94849	11.2158	0
	High	LEAAVAQSEQQGEAALSDAR	1	3	1	O43790		0	40.41	0.000486804	2	2044	1.99477	59.4194	0
P13639	Elongation factor 2 OS=Homo sapiens GN=EEF2 PE=1 SV=4 - [EF2_HUMAN]	52.2634	1.63	1	1	1	2	858	95.277	6.82959
	A2	Sequence	# PSMs	# Proteins	# Protein Groups	Protein Group Accessions	Modifications	ΔCn	IonScore	Exp Value	Charge	MH+ [Da]	ΔM [ppm]	RT [min]	# Missed Cleavages
	High	ETVSEESNVLcLSK	2	1	1	P13639	C11(Carbamidomethyl)	0	41.29	0.000527544	2	1594.76	-3.64797	51.0765	0
Q16706	Alpha-mannosidase 2 OS=Homo sapiens GN=MAN2A1 PE=1 SV=2 - [MA2A1_HUMAN]	51.95	1.14	1	1	1	1	1144	131.057	7.57666
	A2	Sequence	# PSMs	# Proteins	# Protein Groups	Protein Group Accessions	Modifications	ΔCn	IonScore	Exp Value	Charge	MH+ [Da]	ΔM [ppm]	RT [min]	# Missed Cleavages
	High	LLAENNEIISNIR	1	1	1	Q16706		0	51.95	3.57428e-05	2	1498.82	-2.77979	62.473	0
Q9Y4Z0	U6 snRNA-associated Sm-like protein LSm4 OS=Homo sapiens GN=LSM4 PE=1 SV=1 - [LSM4_HUMAN]	51.94	7.19	1	1	1	1	139	15.3399	9.99365
	A2	Sequence	# PSMs	# Proteins	# Protein Groups	Protein Group Accessions	Modifications	ΔCn	IonScore	Exp Value	Charge	MH+ [Da]	ΔM [ppm]	RT [min]	# Missed Cleavages
	High	IPDEIIDMVK	1	1	1	Q9Y4Z0		0	51.94	5.40576e-05	2	1172.63	5.10536	77.0049	0
P18085	ADP-ribosylation factor 4 OS=Homo sapiens GN=ARF4 PE=1 SV=3 - [ARF4_HUMAN]	51.88	3.89	1	1	1	1	180	20.4977	7.13721
	A2	Sequence	# PSMs	# Proteins	# Protein Groups	Protein Group Accessions	Modifications	ΔCn	IonScore	Exp Value	Charge	MH+ [Da]	ΔM [ppm]	RT [min]	# Missed Cleavages
	High	LGLQSLR	1	1	1	P18085		0	51.88	7.23227e-05	2	786.482	-1.38211	35.0167	0
P61513	60S ribosomal protein L37a OS=Homo sapiens GN=RPL37A PE=1 SV=2 - [RL37A_HUMAN]	51.54	9.78	1	1	1	1	92	10.2685	10.4331
	A2	Sequence	# PSMs	# Proteins	# Protein Groups	Protein Group Accessions	Modifications	ΔCn	IonScore	Exp Value	Charge	MH+ [Da]	ΔM [ppm]	RT [min]	# Missed Cleavages
	High	KIEISQHAK	1	1	1	P61513		0	51.54	3.75279e-05	3	1053.6	-3.06468	8.97904	1
Q04637	Eukaryotic translation initiation factor 4 gamma 1 OS=Homo sapiens GN=EIF4G1 PE=1 SV=3 - [IF4G1_HUMAN]	51.36	0.81	1	1	1	1	1600	175.426	5.33838
	A2	Sequence	# PSMs	# Proteins	# Protein Groups	Protein Group Accessions	Modifications	ΔCn	IonScore	Exp Value	Charge	MH+ [Da]	ΔM [ppm]	RT [min]	# Missed Cleavages
	High	IHNAENIQPGEQK	1	1	1	Q04637		0	51.36	6.65337e-05	2	1477.74	-1.49626	10.359	0
P46778	60S ribosomal protein L21 OS=Homo sapiens GN=RPL21 PE=1 SV=2 - [RL21_HUMAN]	50.62	9.38	1	1	1	1	160	18.5531	10.4917
	A2	Sequence	# PSMs	# Proteins	# Protein Groups	Protein Group Accessions	Modifications	ΔCn	IonScore	Exp Value	Charge	MH+ [Da]	ΔM [ppm]	RT [min]	# Missed Cleavages
	High	VYNVTQHAVGIVVNK	1	1	1	P46778		0	50.62	4.20477e-05	2	1640.9	-6.77486	46.4698	0
O43399	Tumor protein D54 OS=Homo sapiens GN=TPD52L2 PE=1 SV=2 - [TPD54_HUMAN]	50.2	5.34	1	1	1	1	206	22.2243	5.36377
	A2	Sequence	# PSMs	# Proteins	# Protein Groups	Protein Group Accessions	Modifications	ΔCn	IonScore	Exp Value	Charge	MH+ [Da]	ΔM [ppm]	RT [min]	# Missed Cleavages
	High	TQETLSQAGQK	1	1	1	O43399		0	50.2	9.35893e-05	2	1190.59	-6.01344	10.2898	0
P05198	Eukaryotic translation initiation factor 2 subunit 1 OS=Homo sapiens GN=EIF2S1 PE=1 SV=3 - [IF2A_HUMAN]	50.11	3.81	1	1	1	1	315	36.0894	5.08447
	A2	Sequence	# PSMs	# Proteins	# Protein Groups	Protein Group Accessions	Modifications	ΔCn	IonScore	Exp Value	Charge	MH+ [Da]	ΔM [ppm]	RT [min]	# Missed Cleavages
	High	VVTDTDETELAR	1	1	1	P05198		0	50.11	0.000101886	2	1348.66	-0.74344	24.6222	0
P07384	Calpain-1 catalytic subunit OS=Homo sapiens GN=CAPN1 PE=1 SV=1 - [CAN1_HUMAN]	50.05	1.4	1	1	1	1	714	81.8382	5.66846
	A2	Sequence	# PSMs	# Proteins	# Protein Groups	Protein Group Accessions	Modifications	ΔCn	IonScore	Exp Value	Charge	MH+ [Da]	ΔM [ppm]	RT [min]	# Missed Cleavages
	High	YLGQDYEQLR	1	1	1	P07384		0	50.05	6.27731e-05	2	1284.62	-0.512121	48.2983	0
Q96DH6	RNA-binding protein Musashi homolog 2 OS=Homo sapiens GN=MSI2 PE=1 SV=1 - [MSI2H_HUMAN]	49.91	4.57	1	1	1	1	328	35.1741	8.48486
	A2	Sequence	# PSMs	# Proteins	# Protein Groups	Protein Group Accessions	Modifications	ΔCn	IonScore	Exp Value	Charge	MH+ [Da]	ΔM [ppm]	RT [min]	# Missed Cleavages
	High	GFGFVTFADPASVDK	1	1	1	Q96DH6		0	49.91	6.07459e-05	2	1557.75	-4.07543	95.518	0
P42677	40S ribosomal protein S27 OS=Homo sapiens GN=RPS27 PE=1 SV=3 - [RS27_HUMAN]	49.8391	23.81	1	2	2	2	84	9.45484	9.45166
	A2	Sequence	# PSMs	# Proteins	# Protein Groups	Protein Group Accessions	Modifications	ΔCn	IonScore	Exp Value	Charge	MH+ [Da]	ΔM [ppm]	RT [min]	# Missed Cleavages
	High	DLLHPSPEEEKR	1	1	1	P42677		0	40.49	0.000803975	3	1449.73	-2.70916	19.7385	1
	High	LTEGcSFR	1	1	1	P42677	C5(Carbamidomethyl)	0	34.52	0.00155401	2	969.442	-3.68971	16.5371	0
P13010	ATP-dependent DNA helicase 2 subunit 2 OS=Homo sapiens GN=XRCC5 PE=1 SV=3 - [KU86_HUMAN]	49.35	1.91	1	1	1	1	732	82.6523	5.80811
	A2	Sequence	# PSMs	# Proteins	# Protein Groups	Protein Group Accessions	Modifications	ΔCn	IonScore	Exp Value	Charge	MH+ [Da]	ΔM [ppm]	RT [min]	# Missed Cleavages
	High	EEASGSSVTAEEAK	1	1	1	P13010		0	49.35	4.35543e-05	2	1394.63	0.605623	10.7962	0
O76071	Probable cytosolic iron-sulfur protein assembly protein CIAO1 OS=Homo sapiens GN=CIAO1 PE=1 SV=1 - [CIAO1_HUMAN]	48.53	5.31	1	1	1	1	339	37.8158	4.97021
	A2	Sequence	# PSMs	# Proteins	# Protein Groups	Protein Group Accessions	Modifications	ΔCn	IonScore	Exp Value	Charge	MH+ [Da]	ΔM [ppm]	RT [min]	# Missed Cleavages
	High	EPGLLAScSDDGEVAFWK	1	1	1	O76071	C8(Carbamidomethyl)	0	48.53	5.61125e-05	2	1980.91	3.53838	94.8932	0
Q92615	La-related protein 4B OS=Homo sapiens GN=LARP4B PE=1 SV=3 - [LAR4B_HUMAN]	48.32	2.17	1	1	1	1	738	80.5026	6.91748
	A2	Sequence	# PSMs	# Proteins	# Protein Groups	Protein Group Accessions	Modifications	ΔCn	IonScore	Exp Value	Charge	MH+ [Da]	ΔM [ppm]	RT [min]	# Missed Cleavages
	High	EPSVPAScAVSATYER	1	1	1	Q92615	C8(Carbamidomethyl)	0	48.32	4.93225e-05	2	1723.79	-5.49076	41.1672	0
Q8NEZ5	F-box only protein 22 OS=Homo sapiens GN=FBXO22 PE=1 SV=1 - [FBX22_HUMAN]	47.91	3.97	1	1	1	1	403	44.4798	7.03467
	A2	Sequence	# PSMs	# Proteins	# Protein Groups	Protein Group Accessions	Modifications	ΔCn	IonScore	Exp Value	Charge	MH+ [Da]	ΔM [ppm]	RT [min]	# Missed Cleavages
	High	IQSATVLLNEDVSDEK	1	1	1	Q8NEZ5		0	47.91	0.000127019	2	1760.9	2.32952	58.3773	0
Q12797	Aspartyl/asparaginyl beta-hydroxylase OS=Homo sapiens GN=ASPH PE=1 SV=3 - [ASPH_HUMAN]	47.02	2.37	1	1	1	1	758	85.8095	5.0083
	A2	Sequence	# PSMs	# Proteins	# Protein Groups	Protein Group Accessions	Modifications	ΔCn	IonScore	Exp Value	Charge	MH+ [Da]	ΔM [ppm]	RT [min]	# Missed Cleavages
	High	LGIYDADGDGDFDVDDAK	1	1	1	Q12797		0	47.02	3.97219e-05	2	1900.82	4.8733	73.9048	0
P62753	40S ribosomal protein S6 OS=Homo sapiens GN=RPS6 PE=1 SV=1 - [RS6_HUMAN]	46.28	3.21	1	1	1	1	249	28.663	10.8433
	A2	Sequence	# PSMs	# Proteins	# Protein Groups	Protein Group Accessions	Modifications	ΔCn	IonScore	Exp Value	Charge	MH+ [Da]	ΔM [ppm]	RT [min]	# Missed Cleavages
	High	LIEVDDER	1	1	1	P62753		0	46.28	0.000156611	2	988.492	-3.09319	21.7785	0
Q3MHD2	Protein LSM12 homolog OS=Homo sapiens GN=LSM12 PE=1 SV=2 - [LSM12_HUMAN]	46.22	6.67	1	1	1	1	195	21.6871	7.73779
	A2	Sequence	# PSMs	# Proteins	# Protein Groups	Protein Group Accessions	Modifications	ΔCn	IonScore	Exp Value	Charge	MH+ [Da]	ΔM [ppm]	RT [min]	# Missed Cleavages
	High	LQGEVVAFDYQSK	1	1	1	Q3MHD2		0	46.22	0.000186249	2	1483.74	-0.0457761	55.6447	0
O43175	D-3-phosphoglycerate dehydrogenase OS=Homo sapiens GN=PHGDH PE=1 SV=4 - [SERA_HUMAN]	45.68	2.81	1	1	1	1	533	56.6144	6.7124
	A2	Sequence	# PSMs	# Proteins	# Protein Groups	Protein Group Accessions	Modifications	ΔCn	IonScore	Exp Value	Charge	MH+ [Da]	ΔM [ppm]	RT [min]	# Missed Cleavages
	High	AGTGVDNVDLEAATR	1	1	1	O43175		0	45.68	0.000168997	2	1488.72	-2.72729	40.4443	0
P57721	Poly(rC)-binding protein 3 OS=Homo sapiens GN=PCBP3 PE=1 SV=1 - [PCBP3_HUMAN]	45.45	3.24	3	1	1	1	339	35.9156	8.06006
	A2	Sequence	# PSMs	# Proteins	# Protein Groups	Protein Group Accessions	Modifications	ΔCn	IonScore	Exp Value	Charge	MH+ [Da]	ΔM [ppm]	RT [min]	# Missed Cleavages
	High	INISEGNcPER	1	3	1	P57721	C8(Carbamidomethyl)	0	45.45	0.00011119	2	1288.59	-2.04136	20.3345	0
Q92478	C-type lectin domain family 2 member B OS=Homo sapiens GN=CLEC2B PE=2 SV=2 - [CLC2B_HUMAN]	45.37	11.41	1	1	1	1	149	17.2954	8.74854
	A2	Sequence	# PSMs	# Proteins	# Protein Groups	Protein Group Accessions	Modifications	ΔCn	IonScore	Exp Value	Charge	MH+ [Da]	ΔM [ppm]	RT [min]	# Missed Cleavages
	High	GSEGcAYLSDDGAATAR	1	1	1	Q92478	C5(Carbamidomethyl)	0	45.37	2.61362e-05	2	1700.71	-2.48161	30.7149	0
P13611	Versican core protein OS=Homo sapiens GN=VCAN PE=1 SV=3 - [CSPG2_HUMAN]	45.31	0.18	1	1	1	1	3396	372.59	4.51318
	A2	Sequence	# PSMs	# Proteins	# Protein Groups	Protein Group Accessions	Modifications	ΔCn	IonScore	Exp Value	Charge	MH+ [Da]	ΔM [ppm]	RT [min]	# Missed Cleavages
	High	DGFIQR	1	1	1	P13611		0	45.31	0.000437247	2	735.377	-2.63655	21.5927	0
P04843	Dolichyl-diphosphooligosaccharide--protein glycosyltransferase subunit 1 OS=Homo sapiens GN=RPN1 PE=1 SV=1 - [RPN1_HUMAN]	45.28	1.98	1	1	1	1	607	68.5268	6.37939
	A2	Sequence	# PSMs	# Proteins	# Protein Groups	Protein Group Accessions	Modifications	ΔCn	IonScore	Exp Value	Charge	MH+ [Da]	ΔM [ppm]	RT [min]	# Missed Cleavages
	High	GEDEEENNLEVR	1	1	1	P04843		0	45.28	3.70604e-05	2	1432.61	-3.17459	21.3957	0
Q9Y3U8	60S ribosomal protein L36 OS=Homo sapiens GN=RPL36 PE=1 SV=3 - [RL36_HUMAN]	44.89	8.57	1	1	1	1	105	12.2459	11.5903
	A2	Sequence	# PSMs	# Proteins	# Protein Groups	Protein Group Accessions	Modifications	ΔCn	IonScore	Exp Value	Charge	MH+ [Da]	ΔM [ppm]	RT [min]	# Missed Cleavages
	High	YPMAVGLNK	1	1	1	Q9Y3U8		0	44.89	0.000298392	2	992.523	0.0743547	34.8605	0
Q15084	Protein disulfide-isomerase A6 OS=Homo sapiens GN=PDIA6 PE=1 SV=1 - [PDIA6_HUMAN]	44.83	3.86	1	1	1	1	440	48.0913	5.08447
	A2	Sequence	# PSMs	# Proteins	# Protein Groups	Protein Group Accessions	Modifications	ΔCn	IonScore	Exp Value	Charge	MH+ [Da]	ΔM [ppm]	RT [min]	# Missed Cleavages
	High	GSTAPVGGGAFPTIVER	1	1	1	Q15084		0	44.83	0.000276235	2	1615.84	-0.240024	62.3167	0
Q8IX12	Cell division cycle and apoptosis regulator protein 1 OS=Homo sapiens GN=CCAR1 PE=1 SV=2 - [CCAR1_HUMAN]	44.8	1.04	1	1	1	1	1150	132.739	5.75732
	A2	Sequence	# PSMs	# Proteins	# Protein Groups	Protein Group Accessions	Modifications	ΔCn	IonScore	Exp Value	Charge	MH+ [Da]	ΔM [ppm]	RT [min]	# Missed Cleavages
	High	ScALAEDPQELR	1	1	1	Q8IX12	C2(Carbamidomethyl)	0	44.8	0.000155632	2	1388.65	-1.50647	34.8868	0
P62306	Small nuclear ribonucleoprotein F OS=Homo sapiens GN=SNRPF PE=1 SV=1 - [RUXF_HUMAN]	44.54	9.3	1	1	1	1	86	9.71878	4.66553
	A2	Sequence	# PSMs	# Proteins	# Protein Groups	Protein Group Accessions	Modifications	ΔCn	IonScore	Exp Value	Charge	MH+ [Da]	ΔM [ppm]	RT [min]	# Missed Cleavages
	High	cNNVLYIR	1	1	1	P62306	C1(Carbamidomethyl)	0	44.54	0.000332225	2	1051.53	-2.46579	35.0356	0
P62875	DNA-directed RNA polymerases I, II, and III subunit RPABC5 OS=Homo sapiens GN=POLR2L PE=1 SV=1 - [RPAB5_HUMAN]	44.46	13.43	1	1	1	1	67	7.63999	7.76709
	A2	Sequence	# PSMs	# Proteins	# Protein Groups	Protein Group Accessions	Modifications	ΔCn	IonScore	Exp Value	Charge	MH+ [Da]	ΔM [ppm]	RT [min]	# Missed Cleavages
	High	LLNYAPLEK	1	1	1	P62875		0	44.46	0.000188001	2	1060.6	-2.25848	48.4458	0
Q02878	60S ribosomal protein L6 OS=Homo sapiens GN=RPL6 PE=1 SV=3 - [RL6_HUMAN]	44.26	3.82	1	1	1	1	288	32.7076	10.5796
	A2	Sequence	# PSMs	# Proteins	# Protein Groups	Protein Group Accessions	Modifications	ΔCn	IonScore	Exp Value	Charge	MH+ [Da]	ΔM [ppm]	RT [min]	# Missed Cleavages
	High	HQEGEIFDTEK	1	1	1	Q02878		0	44.26	0.000161238	2	1332.6	-6.01148	20.0331	0
Q5D1E8	Ribonuclease ZC3H12A OS=Homo sapiens GN=ZC3H12A PE=1 SV=1 - [ZC12A_HUMAN]	44.19	2.17	1	1	1	1	599	65.6579	6.93213
	A2	Sequence	# PSMs	# Proteins	# Protein Groups	Protein Group Accessions	Modifications	ΔCn	IonScore	Exp Value	Charge	MH+ [Da]	ΔM [ppm]	RT [min]	# Missed Cleavages
	High	QEGLTQTYAPSGR	1	1	1	Q5D1E8		0	44.19	0.000268651	2	1407.68	-4.25228	24.74	0
Q6NVV1	Putative 60S ribosomal protein L13a-like MGC87657 OS=Homo sapiens PE=5 SV=1 - [R13AX_HUMAN]	43.54	10.78	2	1	1	1	102	12.1269	10.7554
	A2	Sequence	# PSMs	# Proteins	# Protein Groups	Protein Group Accessions	Modifications	ΔCn	IonScore	Exp Value	Charge	MH+ [Da]	ΔM [ppm]	RT [min]	# Missed Cleavages
	High	YQAVTATLEEK	1	2	1	Q6NVV1		0	43.54	0.000354071	2	1252.64	-2.61993	32.0764	0
O60814	Histone H2B type 1-K OS=Homo sapiens GN=HIST1H2BK PE=1 SV=3 - [H2B1K_HUMAN]	43.1	8.73	15	1	1	1	126	13.8816	10.3159
	A2	Sequence	# PSMs	# Proteins	# Protein Groups	Protein Group Accessions	Modifications	ΔCn	IonScore	Exp Value	Charge	MH+ [Da]	ΔM [ppm]	RT [min]	# Missed Cleavages
	High	QVHPDTGISSK	1	15	1	O60814		0	43.1	0.000438352	3	1168.59	-2.49335	9.902	0
P18621	60S ribosomal protein L17 OS=Homo sapiens GN=RPL17 PE=1 SV=3 - [RL17_HUMAN]	42.92	5.43	1	1	1	1	184	21.3833	10.1694
	A2	Sequence	# PSMs	# Proteins	# Protein Groups	Protein Group Accessions	Modifications	ΔCn	IonScore	Exp Value	Charge	MH+ [Da]	ΔM [ppm]	RT [min]	# Missed Cleavages
	High	SAEFLLHMLK	1	1	1	P18621		0	42.92	0.000382879	2	1188.65	0.802688	76.4097	0
P12956	ATP-dependent DNA helicase 2 subunit 1 OS=Homo sapiens GN=XRCC6 PE=1 SV=2 - [KU70_HUMAN]	42.54	1.48	1	1	1	1	609	69.7991	6.63916
	A2	Sequence	# PSMs	# Proteins	# Protein Groups	Protein Group Accessions	Modifications	ΔCn	IonScore	Exp Value	Charge	MH+ [Da]	ΔM [ppm]	RT [min]	# Missed Cleavages
	High	LGSLVDEFK	1	1	1	P12956		0	42.54	0.000412317	2	1007.54	-1.8394	60.1537	0
P84085	ADP-ribosylation factor 5 OS=Homo sapiens GN=ARF5 PE=1 SV=2 - [ARF5_HUMAN]	42.14	5.56	1	1	1	1	180	20.5166	6.78564
	A2	Sequence	# PSMs	# Proteins	# Protein Groups	Protein Group Accessions	Modifications	ΔCn	IonScore	Exp Value	Charge	MH+ [Da]	ΔM [ppm]	RT [min]	# Missed Cleavages
	High	VQESADELQK	1	1	1	P84085		0	42.14	0.000500972	2	1146.56	-3.82669	12.0426	0
Q9NQC3	Reticulon-4 OS=Homo sapiens GN=RTN4 PE=1 SV=2 - [RTN4_HUMAN]	41.82	1.09	1	1	1	1	1192	129.851	4.50049
	A2	Sequence	# PSMs	# Proteins	# Protein Groups	Protein Group Accessions	Modifications	ΔCn	IonScore	Exp Value	Charge	MH+ [Da]	ΔM [ppm]	RT [min]	# Missed Cleavages
	High	GPLPAAPPVAPER	1	1	1	Q9NQC3		0	41.82	0.000535991	2	1271.71	-4.50391	40.4078	0
P62081	40S ribosomal protein S7 OS=Homo sapiens GN=RPS7 PE=1 SV=1 - [RS7_HUMAN]	41.19	4.64	1	1	1	1	194	22.1133	10.0962
	A2	Sequence	# PSMs	# Proteins	# Protein Groups	Protein Group Accessions	Modifications	ΔCn	IonScore	Exp Value	Charge	MH+ [Da]	ΔM [ppm]	RT [min]	# Missed Cleavages
	High	VETFSGVYK	1	1	1	P62081		0	41.19	0.000528427	2	1029.53	7.37339	32.3449	0
P62906	60S ribosomal protein L10a OS=Homo sapiens GN=RPL10A PE=1 SV=2 - [RL10A_HUMAN]	41.09	3.69	1	1	1	1	217	24.8155	9.93506
	A2	Sequence	# PSMs	# Proteins	# Protein Groups	Protein Group Accessions	Modifications	ΔCn	IonScore	Exp Value	Charge	MH+ [Da]	ΔM [ppm]	RT [min]	# Missed Cleavages
	High	ILGPGLNK	1	1	1	P62906		0	41.09	0.000159497	2	811.503	-0.542047	21.7169	0
P62491	Ras-related protein Rab-11A OS=Homo sapiens GN=RAB11A PE=1 SV=3 - [RB11A_HUMAN]	41.09	5.09	2	1	1	1	216	24.3784	6.56592
	A2	Sequence	# PSMs	# Proteins	# Protein Groups	Protein Group Accessions	Modifications	ΔCn	IonScore	Exp Value	Charge	MH+ [Da]	ΔM [ppm]	RT [min]	# Missed Cleavages
	High	VVLIGDSGVGK	1	2	1	P62491		0	41.09	0.000482383	2	1043.61	-2.51063	34.9975	0
P40616	ADP-ribosylation factor-like protein 1 OS=Homo sapiens GN=ARL1 PE=1 SV=1 - [ARL1_HUMAN]	40.85	8.84	1	1	1	1	181	20.4044	5.71924
	A2	Sequence	# PSMs	# Proteins	# Protein Groups	Protein Group Accessions	Modifications	ΔCn	IonScore	Exp Value	Charge	MH+ [Da]	ΔM [ppm]	RT [min]	# Missed Cleavages
	High	GTGLDEAMEWLVETLK	1	1	1	P40616		0	40.85	0.000559125	2	1791.89	1.45245	114.43	0
O15523	ATP-dependent RNA helicase DDX3Y OS=Homo sapiens GN=DDX3Y PE=1 SV=2 - [DDX3Y_HUMAN]	40.81	1.67	2	1	1	1	660	73.1081	7.54736
	A2	Sequence	# PSMs	# Proteins	# Protein Groups	Protein Group Accessions	Modifications	ΔCn	IonScore	Exp Value	Charge	MH+ [Da]	ΔM [ppm]	RT [min]	# Missed Cleavages
	High	VGSTSENITQK	1	2	1	O15523		0	40.81	0.000796657	2	1163.59	-2.5554	10.5198	0
P10809	60 kDa heat shock protein, mitochondrial OS=Homo sapiens GN=HSPD1 PE=1 SV=2 - [CH60_HUMAN]	40.67	3.66	1	1	1	1	573	61.0164	5.87158
	A2	Sequence	# PSMs	# Proteins	# Protein Groups	Protein Group Accessions	Modifications	ΔCn	IonScore	Exp Value	Charge	MH+ [Da]	ΔM [ppm]	RT [min]	# Missed Cleavages
	High	ALMLQGVDLLADAVAVTMGPK	1	1	1	P10809		0	40.67	0.000244256	3	2113.15	3.34164	114.446	0
P60468	Protein transport protein Sec61 subunit beta OS=Homo sapiens GN=SEC61B PE=1 SV=2 - [SC61B_HUMAN]	40.17	15.63	1	1	1	1	96	9.9681	11.561
	A2	Sequence	# PSMs	# Proteins	# Protein Groups	Protein Group Accessions	Modifications	ΔCn	IonScore	Exp Value	Charge	MH+ [Da]	ΔM [ppm]	RT [min]	# Missed Cleavages
	High	PGPTPSGTNVGSSGR	1	1	1	P60468		0	40.17	0.000572159	2	1370.66	-5.44004	11.545	0
Q9H0U3	Magnesium transporter protein 1 OS=Homo sapiens GN=MAGT1 PE=1 SV=1 - [MAGT1_HUMAN]	39.55	2.39	1	1	1	1	335	38.0114	9.62744
	A2	Sequence	# PSMs	# Proteins	# Protein Groups	Protein Group Accessions	Modifications	ΔCn	IonScore	Exp Value	Charge	MH+ [Da]	ΔM [ppm]	RT [min]	# Missed Cleavages
	High	KEmVLSEK	1	1	1	Q9H0U3	M3(Oxidation)	0	39.55	0.000870702	2	979.506	-6.90673	24.7712	1
Q6PKG0	La-related protein 1 OS=Homo sapiens GN=LARP1 PE=1 SV=2 - [LARP1_HUMAN]	39.13	1.09	1	1	1	1	1096	123.434	8.82178
	A2	Sequence	# PSMs	# Proteins	# Protein Groups	Protein Group Accessions	Modifications	ΔCn	IonScore	Exp Value	Charge	MH+ [Da]	ΔM [ppm]	RT [min]	# Missed Cleavages
	High	FQQVPTDALANK	1	1	1	Q6PKG0		0	39.13	0.00116071	2	1331.69	-4.92677	36.2859	0
P01859	Ig gamma-2 chain C region OS=Homo sapiens GN=IGHG2 PE=1 SV=2 - [IGHG2_HUMAN]	38.75	2.76	1	1	1	1	326	35.8778	7.59131
	A2	Sequence	# PSMs	# Proteins	# Protein Groups	Protein Group Accessions	Modifications	ΔCn	IonScore	Exp Value	Charge	MH+ [Da]	ΔM [ppm]	RT [min]	# Missed Cleavages
	High	EEQFNSTFR	1	1	1	P01859		0	38.75	0.000413392	2	1157.52	-2.07194	28.0178	0
Q8TB61	Adenosine 3'-phospho 5'-phosphosulfate transporter 1 OS=Homo sapiens GN=SLC35B2 PE=1 SV=1 - [S35B2_HUMAN]	38.38	2.78	1	1	1	1	432	47.4836	9.15869
	A2	Sequence	# PSMs	# Proteins	# Protein Groups	Protein Group Accessions	Modifications	ΔCn	IonScore	Exp Value	Charge	MH+ [Da]	ΔM [ppm]	RT [min]	# Missed Cleavages
	High	SYGATATSPGER	1	1	1	Q8TB61		0	38.38	0.000740577	2	1196.55	-4.69661	11.307	0
P69905	Hemoglobin subunit alpha OS=Homo sapiens GN=HBA1 PE=1 SV=2 - [HBA_HUMAN]	38.32	6.34	1	1	1	1	142	15.2479	8.67529
	A2	Sequence	# PSMs	# Proteins	# Protein Groups	Protein Group Accessions	Modifications	ΔCn	IonScore	Exp Value	Charge	MH+ [Da]	ΔM [ppm]	RT [min]	# Missed Cleavages
	High	LRVDPVNFK	1	1	1	P69905		0	38.32	0.00103798	3	1087.63	-0.133066	34.9067	1
P42766	60S ribosomal protein L35 OS=Homo sapiens GN=RPL35 PE=1 SV=2 - [RL35_HUMAN]	37.89	8.13	1	1	1	1	123	14.5426	11.0483
	A2	Sequence	# PSMs	# Proteins	# Protein Groups	Protein Group Accessions	Modifications	ΔCn	IonScore	Exp Value	Charge	MH+ [Da]	ΔM [ppm]	RT [min]	# Missed Cleavages
	High	VLTVINQTQK	1	1	1	P42766		0	37.89	0.000804647	2	1143.67	-4.03491	23.222	0
P07237	Protein disulfide-isomerase OS=Homo sapiens GN=P4HB PE=1 SV=3 - [PDIA1_HUMAN]	37.74	3.15	1	1	1	1	508	57.0807	4.86865
	A2	Sequence	# PSMs	# Proteins	# Protein Groups	Protein Group Accessions	Modifications	ΔCn	IonScore	Exp Value	Charge	MH+ [Da]	ΔM [ppm]	RT [min]	# Missed Cleavages
	High	VDATEESDLAQQYGVR	1	1	1	P07237		0	37.74	0.00107691	2	1780.84	3.43584	58.0094	0
A6NI56	Coiled-coil domain-containing protein 154 OS=Homo sapiens GN=CCDC154 PE=2 SV=4 - [CC154_HUMAN]	37.73	1.19	1	1	1	1	674	75.966	8.38232
	A2	Sequence	# PSMs	# Proteins	# Protein Groups	Protein Group Accessions	Modifications	ΔCn	IonScore	Exp Value	Charge	MH+ [Da]	ΔM [ppm]	RT [min]	# Missed Cleavages
	High	TEWEGAER	1	1	1	A6NI56		0	37.73	0.000472235	2	977.429	-2.92639	11.2604	0
P63173	60S ribosomal protein L38 OS=Homo sapiens GN=RPL38 PE=1 SV=2 - [RL38_HUMAN]	37.52	14.29	1	1	1	1	70	8.21273	10.0962
	A2	Sequence	# PSMs	# Proteins	# Protein Groups	Protein Group Accessions	Modifications	ΔCn	IonScore	Exp Value	Charge	MH+ [Da]	ΔM [ppm]	RT [min]	# Missed Cleavages
	High	QSLPPGLAVK	1	1	1	P63173		0	37.52	0.000274367	2	1009.6	-1.63105	34.6582	0
Q9HC07	Transmembrane protein 165 OS=Homo sapiens GN=TMEM165 PE=1 SV=1 - [TM165_HUMAN]	37.08	7.72	1	1	1	1	324	34.8835	7.02002
	A2	Sequence	# PSMs	# Proteins	# Protein Groups	Protein Group Accessions	Modifications	ΔCn	IonScore	Exp Value	Charge	MH+ [Da]	ΔM [ppm]	RT [min]	# Missed Cleavages
	High	NKEPPAPAQQLQPQPVAVQGPEPAR	1	1	1	Q9HC07		0	37.08	0.00062683	3	2647.39	-1.71948	40.4309	1
P14618	Pyruvate kinase isozymes M1/M2 OS=Homo sapiens GN=PKM2 PE=1 SV=4 - [KPYM_HUMAN]	36.75	4.14	1	1	1	1	531	57.9	7.84033
	A2	Sequence	# PSMs	# Proteins	# Protein Groups	Protein Group Accessions	Modifications	ΔCn	IonScore	Exp Value	Charge	MH+ [Da]	ΔM [ppm]	RT [min]	# Missed Cleavages
	High	LAPITSDPTEATAVGAVEASFK	1	1	1	P14618		0	36.75	0.00125753	2	2175.11	-2.29257	100.309	0
Q9C040	Tripartite motif-containing protein 2 OS=Homo sapiens GN=TRIM2 PE=1 SV=1 - [TRIM2_HUMAN]	33.83	0.81	1	1	1	1	744	81.4791	6.96143
	A2	Sequence	# PSMs	# Proteins	# Protein Groups	Protein Group Accessions	Modifications	ΔCn	IonScore	Exp Value	Charge	MH+ [Da]	ΔM [ppm]	RT [min]	# Missed Cleavages
	High	DGELcK	1	1	1	Q9C040	C5(Carbamidomethyl)	0	33.83	0.0010971	2	721.318	-0.713329	59.6543	0
Q9BZR8	Apoptosis facilitator Bcl-2-like protein 14 OS=Homo sapiens GN=BCL2L14 PE=1 SV=1 - [B2L14_HUMAN]	33.08	1.83	3	1	1	1	327	36.5755	6.62451
	A2	Sequence	# PSMs	# Proteins	# Protein Groups	Protein Group Accessions	Modifications	ΔCn	IonScore	Exp Value	Charge	MH+ [Da]	ΔM [ppm]	RT [min]	# Missed Cleavages
	High	IVELLK	1	3	1	Q9BZR8		0	33.08	0.000762661	2	714.473	-4.58578	35.1636	0

## Sheet: MS raw data-HCCLM3 Flag 
Accession	Description	Score	Coverage	# Proteins	# Unique Peptides	# Peptides	# PSMs	# AAs	MW [kDa]	calc. pI
Q7Z417	Nuclear fragile X mental retardation-interacting protein 2 OS=Homo sapiens GN=NUFIP2 PE=1 SV=1 - [NUFP2_HUMAN]	1388.33	20.43	1	12	12	41	695	76.0747	8.70459
	A2	Sequence	# PSMs	# Proteins	# Protein Groups	Protein Group Accessions	Modifications	ΔCn	IonScore	Exp Value	Charge	MH+ [Da]	ΔM [ppm]	RT [min]	# Missed Cleavages
	High	GADNDGSGSESGYTTPK	2	1	1	Q7Z417		0	109.92	8.65803e-12	2	1642.68	-2.89478	12.2863	0
	High	NLSSDEATNPISR	15	1	1	Q7Z417		0	85.64	1.6101e-08	2	1403.67	-1.37451	27.1566	0
	High	TGYGELNGNAGER	3	1	1	Q7Z417		0	67.59	6.61887e-07	2	1337.6	-5.39296	20.6545	0
	High	GcENLNIVQDK	6	1	1	Q7Z417	C2(Carbamidomethyl)	0	64.18	1.98611e-06	2	1289.61	-5.83708	28.9007	0
	High	VLNGNQQVVDTSLK	2	1	1	Q7Z417		0	58.28	9.65858e-06	2	1514.82	1.33497	35.9296	0
	High	IMQQETSVPTLK	1	1	1	Q7Z417		0	56.97	1.6575e-05	2	1374.72	-4.71157	37.899	0
	High	YETGPGGTSR	1	1	1	Q7Z417		0	54.24	1.67633e-05	2	1024.47	-3.73612	9.94961	0
	High	NDSWGSFDLR	4	1	1	Q7Z417		0	48.94	5.74397e-05	2	1196.53	-0.104232	70.3706	0
	High	EMESIWNLQK	2	1	1	Q7Z417		0	48.92	0.000103869	2	1277.62	-3.11924	69.0176	0
	High	IITYNEAMDSPDQ	3	1	1	Q7Z417		0	41.72	0.000215353	2	1496.65	-4.08818	55.8102	0
	High	AAIVYHTK	1	1	1	Q7Z417		0	40.42	0.00086243	2	902.506	-3.58906	10.0549	0
	High	HTLQQHQETPK	1	1	1	Q7Z417		0	40.15	0.000879106	2	1346.68	-3.6952	8.16764	0
P52272	Ankyrin repeat and KH domain-containing protein 1 OS=Homo sapiens GN=ANKHD1 PE=1 SV=1 - [ANKH1_HUMAN]	800.104	26.16	1	18	18	31	730	77.4643	8.70459
	A2	Sequence	# PSMs	# Proteins	# Protein Groups	Protein Group Accessions	Modifications	ΔCn	IonScore	Exp Value	Charge	MH+ [Da]	ΔM [ppm]	RT [min]	# Missed Cleavages
	High	VGEVTYVELLMDAEGK	1	1	1	P52272		0	76.24	1.75886e-07	2	1752.88	1.58051	108.82	0
	High	MGAGMGFGLER	5	1	1	P52272		0	71.65	3.8983e-07	2	1125.52	3.74324	57.826	0
	High	MGPAMGPALGAGIER	4	1	1	P52272		0	61.88	4.34585e-06	2	1427.71	-0.380382	59.4935	0
	High	VGQTIER	1	1	1	P52272		0	61.01	1.35914e-05	2	802.44	-2.38568	9.99532	0
	High	QGGGGGGGSVPGIER	2	1	1	P52272		0	55.66	1.73852e-05	2	1284.63	-3.22561	17.9683	0
	High	VGSEIER	1	1	1	P52272		0	55.38	5.21522e-05	2	789.407	-4.41786	10.2038	0
	High	MGAGLGHGMDR	1	1	1	P52272		0	53.82	1.09963e-05	2	1101.49	0.62331	15.0124	0
	High	LGGAGMER	1	1	1	P52272		0	51.86	4.62656e-05	2	790.384	-4.06674	10.9756	0
	High	MGLVMDR	5	1	1	P52272		0	50.47	7.31404e-05	2	821.398	-3.94534	30.919	0
	High	INEILSNALK	2	1	1	P52272		0	48.51	7.18737e-05	2	1114.64	-2.12318	55.3119	0
	High	FESPEVAER	1	1	1	P52272		0	45.22	0.00018788	2	1063.5	-2.85123	22.9341	0
	High	FGSGMNMGR	1	1	1	P52272		0	44.51	7.25695e-05	2	956.408	0.394553	24.0336	0
	High	GcAVVEFK	1	1	1	P52272	C2(Carbamidomethyl)	0	44.19	0.000280083	2	909.446	-4.33764	26.5114	0
	High	EVFSMAGVVVR	1	1	1	P52272		0	43.84	0.000293264	2	1193.64	3.50384	73.6375	0
	High	ADILEDK	1	1	1	P52272		0	42.98	0.000478326	2	803.416	1.40116	17.5235	0
	High	AFITNIPFDVK	1	1	1	P52272		0	42.08	0.000346887	2	1264.69	0.764119	89.2012	0
	High	LGSTVFVANLDYK	1	1	1	P52272		0	40.27	0.000540341	2	1426.75	-2.29133	74.2023	0
	High	MGANSLER	1	1	1	P52272		0	38.13	0.00120745	2	877.418	-1.96712	13.9842	0
P08729	Keratin, type II cytoskeletal 7 OS=Homo sapiens GN=KRT7 PE=1 SV=4 - [K2C7_HUMAN]	799.955	30.28	1	13	14	26	469	51.3734	5.49072
	A2	Sequence	# PSMs	# Proteins	# Protein Groups	Protein Group Accessions	Modifications	ΔCn	IonScore	Exp Value	Charge	MH+ [Da]	ΔM [ppm]	RT [min]	# Missed Cleavages
	High	LPDIFEAQIAGLR	4	1	1	P08729		0	95.38	2.05711e-09	2	1442.8	-2.23637	104.734	0
	High	VDALNDEINFLR	5	1	1	P08729		0	78.14	1.54996e-07	2	1418.73	2.04618	86.9582	0
	High	LEAAIAEAEER	1	1	1	P08729		0	73.52	3.51259e-07	2	1201.6	-1.91078	32.663	0
	High	GQLEALQVDGGR	1	1	1	P08729		0	69.85	7.55654e-07	2	1242.64	-0.520902	37.0106	0
	High	AKQEELEAALQR	2	1	1	P08729		0	61.79	4.83418e-06	2	1385.73	-2.77588	30.649	1
	High	SLDLDGIIAEVK	2	1	1	P08729		0	55.05	2.37582e-05	2	1272.7	-1.62572	102.815	0
	High	LLEGEESR	1	3	3	P05787;P08670;P08729		0	53.05	5.37563e-05	2	932.464	-4.54964	12.4644	0
	High	LQAEIDNIK	1	1	1	P08729		0	50.74	6.24068e-05	2	1043.57	-2.83955	29.6481	0
	High	LDADPSLQR	1	1	1	P08729		0	49.46	7.41722e-05	2	1014.52	-3.39898	21.4882	0
	High	PGGLGSSSLYGLGASR	1	1	1	P08729		0	42.5	0.000463932	2	1478.76	-1.92438	59.8279	0
	High	AKLEAAIAEAEER	1	1	1	P08729		0	39.66	0.000870554	2	1400.74	1.66537	44.5178	1
	High	SMQDVVEDFK	2	1	1	P08729		0	39.08	0.000512918	2	1197.54	-3.8563	64.0108	0
	High	NEISEMNR	3	1	1	P08729		0	38.42	0.000654653	2	992.445	-2.0703	15.1247	0
	High	AQYEEMAK	1	1	1	P08729		0	35.02	0.00110171	2	969.429	-5.70083	12.7524	0
P08670	Vimentin OS=Homo sapiens GN=VIM PE=1 SV=4 - [VIME_HUMAN]	770.885	32.62	1	13	14	29	466	53.6191	5.12256
	A2	Sequence	# PSMs	# Proteins	# Protein Groups	Protein Group Accessions	Modifications	ΔCn	IonScore	Exp Value	Charge	MH+ [Da]	ΔM [ppm]	RT [min]	# Missed Cleavages
	High	FADLSEAANR	7	1	1	P08670		0	76.57	2.15887e-07	2	1093.53	-1.61039	28.5816	0
	High	QDVDNASLAR	2	1	1	P08670		0	71.04	5.1945e-07	2	1088.53	-3.47885	13.7326	0
	High	VELQELNDR	1	1	1	P08670		0	61.25	5.6992e-06	2	1115.57	-2.55433	32.9327	0
	High	KVESLQEEIAFLK	4	1	1	P08670		0	57.34	6.3653e-06	2	1533.86	4.92195	77.467	1
	High	ILLAELEQLK	4	1	1	P08670		0	57.05	4.43795e-06	2	1169.72	0.813975	89.2326	0
	High	ETNLDSLPLVDTHSK	1	1	1	P08670		0	55.91	1.56434e-05	2	1668.85	3.69953	53.8128	0
	High	LLEGEESR	1	3	3	P05787;P08670;P08729		0	53.05	5.37563e-05	2	932.464	-4.54964	12.4644	0
	High	EEAENTLQSFR	1	1	1	P08670		0	50.01	5.83655e-05	2	1323.61	-3.22031	39.2574	0
	High	MFGGPGTASR	1	1	1	P08670		0	47.42	8.33216e-05	2	980.458	-3.85009	18.8838	0
	High	LLQDSVDFSLADAINTEFK	1	1	1	P08670		0	46.65	0.000125438	2	2126.07	0.546807	110.238	0
	High	LQDEIQNMK	2	1	1	P08670		0	44.31	0.000341026	2	1118.55	-2.41729	25.6532	0
	High	LQEEMLQR	1	1	1	P08670		0	43.56	0.000414122	2	1046.53	-3.97206	25.7858	0
	High	NLQEAEEWYK	2	1	1	P08670		0	40.54	0.000525433	2	1309.6	-1.07782	54.7806	0
	High	LGDLYEEEMR	1	1	1	P08670		0	37.71	0.000643848	2	1254.56	-3.7589	49.3016	0
P13645	Keratin, type I cytoskeletal 10 OS=Homo sapiens GN=KRT10 PE=1 SV=6 - [K1C10_HUMAN]	736.364	18.32	1	8	9	24	584	58.7917	5.21143
	A2	Sequence	# PSMs	# Proteins	# Protein Groups	Protein Group Accessions	Modifications	ΔCn	IonScore	Exp Value	Charge	MH+ [Da]	ΔM [ppm]	RT [min]	# Missed Cleavages
	High	GSLGGGFSSGGFSGGSFSR	4	1	1	P13645		0	88.56	4.31879e-09	2	1707.76	-4.69827	66.6938	0
	High	SLLEGEGSSGGGGR	5	1	1	P13645		0	81.99	3.85771e-08	2	1262.59	-3.3805	18.6753	0
	High	VLDELTLTK	5	1	1	P13645		0	68.51	6.76459e-07	2	1031.6	3.98728	50.4887	0
	High	QSLEASLAETEGR	2	1	1	P13645		0	67.44	1.26211e-06	2	1390.68	-2.96682	49.3116	0
	High	SQYEQLAEQNR	2	1	1	P13645		0	52.8	3.04388e-05	2	1365.63	-3.51647	23.7393	0
	High	LENEIQTYR	1	1	1	P13645		0	44.71	0.000332994	2	1165.58	-2.13482	26.467	0
	High	LAADDFR	2	3	3	P13645;Q04695;P05783		0	42.03	0.000676743	2	807.398	-2.20163	25.0609	0
	High	YENEVALR	1	1	1	P13645		0	40.05	0.00112201	2	993.499	-1.44796	22.6939	0
	High	ELTTEIDNNIEQISSYK	2	1	1	P13645		0	38.9	0.000863127	2	1996.98	3.4099	91.5078	0
Q8IWZ3	Ankyrin repeat and KH domain-containing protein 1 OS=Homo sapiens GN=ANKHD1 PE=1 SV=1 - [ANKH1_HUMAN]	733.332	6.92	1	7	14	27	2542	269.291	5.73193
	A2	Sequence	# PSMs	# Proteins	# Protein Groups	Protein Group Accessions	Modifications	ΔCn	IonScore	Exp Value	Charge	MH+ [Da]	ΔM [ppm]	RT [min]	# Missed Cleavages
	High	AEVVSLLLDR	2	1	1	Q8IWZ3		0	75.7	1.7495e-07	2	1114.64	-3.99392	80.2489	0
	High	LEALLEAAGIGK	1	2	2	Q8IWZ3;O75179		0	72.98	2.44198e-07	2	1184.69	4.37403	76.252	0
	High	NTALTLAcFQGR	4	2	2	Q8IWZ3;O75179	C8(Carbamidomethyl)	0	71.21	6.50876e-07	2	1351.67	-3.61002	61.9943	0
	High	QEVVDLLLAR	4	1	1	Q8IWZ3		0	68.64	3.96641e-07	2	1155.67	-1.58088	82.3261	0
	High	DTPLSLAcSGGR	3	2	2	Q8IWZ3;O75179	C8(Carbamidomethyl)	0	67.13	1.26836e-06	2	1233.59	-0.094337	42.4539	0
	High	TGLTPLMEAASGGYAEVGR	4	2	2	Q8IWZ3;O75179		0	52.77	4.04261e-05	2	1879.92	-2.0229	91.4432	0
	High	TSQENSPALLGVQK	1	1	1	Q8IWZ3		0	52.2	4.39868e-05	2	1471.77	-3.71008	33.2124	0
	High	LTSSVScALDEAAAALTR	2	2	2	Q8IWZ3;O75179	C7(Carbamidomethyl)	0	51.28	4.91523e-05	2	1835.92	-0.0270461	108.507	0
	High	SLAEAcSDGDVNAVR	1	1	1	Q8IWZ3	C6(Carbamidomethyl)	0	49.01	4.0193e-05	2	1563.69	-9.06236	28.1269	0
	High	ESALTLAcYK	1	2	2	Q8IWZ3;O75179	C8(Carbamidomethyl)	0	47.46	0.000124734	2	1155.57	-3.18344	45.7044	0
	High	TTSEIFLSSTAEGADLR	1	1	1	Q8IWZ3		0	45.29	0.000214456	2	1797.89	4.31249	72.7536	0
	High	DTALTIAADK	1	2	2	Q8IWZ3;O75179		0	41.08	0.000850015	2	1018.54	-3.37519	28.0153	0
	High	NASILLK	1	1	1	Q8IWZ3		0	38.64	0.0012036	2	758.474	-4.0274	24.7648	0
	High	cHQcVETIVK	1	1	1	Q8IWZ3	C1(Carbamidomethyl); C4(Carbamidomethyl)	0	37.48	0.00115228	2	1273.59	-7.54719	14.5923	0
P62269	40S ribosomal protein S18 OS=Homo sapiens GN=RPS18 PE=1 SV=3 - [RS18_HUMAN]	636.776	44.08	1	9	9	26	152	17.7079	10.9897
	A2	Sequence	# PSMs	# Proteins	# Protein Groups	Protein Group Accessions	Modifications	ΔCn	IonScore	Exp Value	Charge	MH+ [Da]	ΔM [ppm]	RT [min]	# Missed Cleavages
	High	KADIDLTK	1	1	1	P62269		0	66.39	2.7439e-06	2	903.509	-5.79443	11.4235	1
	High	VLNTNIDGR	2	1	1	P62269		0	62.27	7.67838e-06	2	1001.54	-2.27396	19.7215	0
	High	VITImQNPR	3	1	1	P62269	M5(Oxidation)	0	58.22	1.95106e-05	2	1087.59	0.71647	34.372	0
	High	IAFAITAIK	11	1	1	P62269		0	56.87	1.9531e-06	2	947.592	-0.414404	68.809	0
	High	IPDWFLNR	1	1	1	P62269		0	52.6	7.63862e-05	2	1060.56	-1.79313	81.5213	0
	High	YSQVLANGLDNK	1	1	1	P62269		0	50.82	7.45148e-05	2	1321.68	1.03784	34.6832	0
	High	AGELTEDEVER	1	1	1	P62269		0	48.24	4.57404e-05	2	1247.57	-3.67845	22.4301	0
	High	RAGELTEDEVER	5	1	1	P62269		0	47.67	0.000104311	3	1403.67	-3.7464	16.3492	1
	High	ADIDLTK	1	1	1	P62269		0	45.35	0.000455119	2	775.421	1.11874	17.7105	0
P11940	Polyadenylate-binding protein 1 OS=Homo sapiens GN=PABPC1 PE=1 SV=2 - [PABP1_HUMAN]	621.575	23.9	1	10	15	23	636	70.6259	9.49561
	A2	Sequence	# PSMs	# Proteins	# Protein Groups	Protein Group Accessions	Modifications	ΔCn	IonScore	Exp Value	Charge	MH+ [Da]	ΔM [ppm]	RT [min]	# Missed Cleavages
	High	SGVGNIFIK	1	1	1	P11940		0	74.83	2.33485e-07	2	934.539	4.05013	50.4619	0
	High	VDEAVAVLQAHQAK	1	1	1	P11940		0	69.15	7.1755e-07	2	1478.8	0.543258	33.745	0
	High	ALYDTFSAFGNILScK	1	2	2	P11940;Q13310	C15(Carbamidomethyl)	0	58.3	9.09652e-06	2	1806.88	3.94676	109.943	0
	High	FGPALSVK	1	1	1	P11940		0	57.86	1.11304e-05	2	818.475	-2.55123	36.29	0
	High	GYGFVHFETQEAAER	4	1	1	P11940		0	57.14	9.27345e-06	3	1740.8	0.146743	56.0016	0
	High	PLYVALAQR	2	2	2	P11940;Q13310		0	56	1.09267e-05	2	1030.6	-0.960744	46.1777	0
	High	NLDDGIDDER	2	1	1	P11940		0	52.01	6.29506e-06	2	1161.5	-3.48771	25.0357	0
	High	GFGFVSFER	1	1	1	P11940		0	49.62	7.47637e-05	2	1045.51	-4.81753	78.0467	0
	High	ALDTMNFDVIK	1	2	2	P11940;Q13310		0	49.21	8.87629e-05	2	1266.64	-1.81619	77.3948	0
	High	IVATKPLYVALAQR	3	1	1	P11940		0	49.2	4.80906e-06	2	1542.94	1.74171	57.9739	1
	High	MNGMLLNDR	1	2	2	P11940;Q13310		0	47.89	0.000108099	2	1063.5	1.13431	37.0045	0
	High	GFGFVcFSSPEEATK	1	2	2	P11940;Q13310	C6(Carbamidomethyl)	0	45.46	9.38672e-05	2	1662.74	-2.30084	81.5229	0
	High	SKVDEAVAVLQAHQAK	1	1	1	P11940		0	45.42	0.000133491	3	1693.92	-1.57913	45.9553	1
	High	QAHLTNQYMQR	2	1	1	P11940		0	41.42	0.000548042	2	1389.66	-3.42168	16.805	0
	High	YQGVNLYVK	1	1	1	P11940		0	39.34	0.000675193	2	1083.58	-4.65738	42.3692	0
Q96I24	Far upstream element-binding protein 3 OS=Homo sapiens GN=FUBP3 PE=1 SV=2 - [FUBP3_HUMAN]	559.18	19.06	1	8	8	22	572	61.6022	8.38232
	A2	Sequence	# PSMs	# Proteins	# Protein Groups	Protein Group Accessions	Modifications	ΔCn	IonScore	Exp Value	Charge	MH+ [Da]	ΔM [ppm]	RT [min]	# Missed Cleavages
	High	RPLDDGVGNQLGALVHQR	4	1	1	Q96I24		0	93.46	2.43441e-09	3	1945.03	-3.8501	61.9419	1
	High	cGLVIGK	10	1	1	Q96I24	C1(Carbamidomethyl)	0	60.94	1.42955e-05	2	746.421	-2.0511	20.3441	0
	High	AEGFVDALHR	2	1	1	Q96I24		0	53.79	2.82035e-05	2	1114.56	-1.34017	35.0009	0
	High	VGLVIGR	2	1	1	Q96I24		0	48.58	6.7951e-05	2	713.468	1.31714	29.9575	0
	High	GDWSVGAPGGVQEITYTVPADK	1	1	1	Q96I24		0	48.25	7.93005e-05	2	2247.09	0.0684782	81.2363	0
	High	AAQVMGPPDR	1	1	1	Q96I24		0	44.39	0.000211071	2	1041.51	-3.01398	15.6952	0
	High	IDSIPHLNNSTPLVDPSVYGYGVQK	1	1	1	Q96I24		0	43.64	0.000224907	3	2713.39	1.64671	88.1481	0
	High	GVPQQIEVAR	1	1	1	Q96I24		0	40.46	0.000611658	2	1096.61	-0.428656	26.5021	0
Q14157	Ubiquitin-associated protein 2-like OS=Homo sapiens GN=UBAP2L PE=1 SV=2 - [UBP2L_HUMAN]	558.492	19.41	1	14	14	25	1087	114.465	7.10791
	A2	Sequence	# PSMs	# Proteins	# Protein Groups	Protein Group Accessions	Modifications	ΔCn	IonScore	Exp Value	Charge	MH+ [Da]	ΔM [ppm]	RT [min]	# Missed Cleavages
	High	LAQMISDHNDADFEEK	4	1	1	Q14157		0	60.95	1.36599e-06	2	1862.81	-4.74712	39.18	0
	High	IDLAVLLGK	5	1	1	Q14157		0	60.12	1.84822e-06	2	941.607	4.1736	95.1718	0
	High	GGSTTGSQFLEQFK	2	1	1	Q14157		0	58.13	1.06133e-05	2	1486.72	3.1345	66.8402	0
	High	RYPSSISSSPQK	1	1	1	Q14157		0	49.09	0.000118995	2	1336.68	-4.28983	11.2194	1
	High	GFGDVGEAK	2	1	1	Q14157		0	48.43	0.000129194	2	879.418	-3.22602	18.489	0
	High	YPSSISSSPQK	2	1	1	Q14157		0	46.17	0.000213768	2	1180.58	-3.16389	15.7394	0
	High	QRPQATAEQIR	2	1	1	Q14157		0	44.86	0.000217181	3	1297.69	-3.24809	10.4471	1
	High	NGFSSVQATQLQTTQSVEGATGSAVK	1	1	1	Q14157		0	44.83	0.000162782	2	2596.3	4.39588	66.1019	0
	High	SQTSSIPQKPQTNK	1	1	1	Q14157		0	43.77	0.000272843	2	1543.8	-2.50993	10.0657	1
	High	TATEEWGTEDWNEDLSETK	1	1	1	Q14157		0	42.8	7.3473e-05	2	2240.94	-0.811926	76.9374	0
	High	DGSLASNPYSGDLTK	1	1	1	Q14157		0	39.02	0.000808276	2	1524.72	0.959199	47.6151	0
	High	AINVLLEGNPDTHSWEMVGK	1	1	1	Q14157		0	37.29	0.00110116	3	2210.1	4.59263	87.4036	0
	High	SPAVATSTAAPPPPSSPLPSK	1	1	1	Q14157		0	37.04	0.00101814	2	1960.03	-3.95397	38.4684	0
	High	STSAPQMSPGSSDNQSSSPQPAQQK	1	1	1	Q14157		0	34.52	0.000565093	3	2532.12	-3.01191	17.2345	0
O75179	Ankyrin repeat domain-containing protein 17 OS=Homo sapiens GN=ANKRD17 PE=1 SV=3 - [ANR17_HUMAN]	557.584	5.53	1	4	11	20	2603	274.088	6.52197
	A2	Sequence	# PSMs	# Proteins	# Protein Groups	Protein Group Accessions	Modifications	ΔCn	IonScore	Exp Value	Charge	MH+ [Da]	ΔM [ppm]	RT [min]	# Missed Cleavages
	High	LEALLEAAGIGK	1	2	2	Q8IWZ3;O75179		0	72.98	2.44198e-07	2	1184.69	4.37403	76.252	0
	High	NTALTLAcFQGR	4	2	2	Q8IWZ3;O75179	C8(Carbamidomethyl)	0	71.21	6.50876e-07	2	1351.67	-3.61002	61.9943	0
	High	DTPLSLAcSGGR	3	2	2	Q8IWZ3;O75179	C8(Carbamidomethyl)	0	67.13	1.26836e-06	2	1233.59	-0.094337	42.4539	0
	High	SLAEAcSEGDVNAVR	1	1	1	O75179	C6(Carbamidomethyl)	0	66.49	9.08772e-07	2	1577.72	-1.33787	30.6392	0
	High	TGLTPLMEAASGGYAEVGR	4	2	2	Q8IWZ3;O75179		0	52.77	4.04261e-05	2	1879.92	-2.0229	91.4432	0
	High	NASILLEELDLEK	1	1	1	O75179		0	51.48	4.40952e-05	2	1486.81	4.75054	101.977	0
	High	LTSSVScALDEAAAALTR	2	2	2	Q8IWZ3;O75179	C7(Carbamidomethyl)	0	51.28	4.91523e-05	2	1835.92	-0.0270461	108.507	0
	High	ISScSDESSNSNSSR	1	1	1	O75179	C4(Carbamidomethyl)	0	48.03	4.49093e-06	2	1616.64	-5.90455	8.78554	0
	High	ESALTLAcYK	1	2	2	Q8IWZ3;O75179	C8(Carbamidomethyl)	0	47.46	0.000124734	2	1155.57	-3.18344	45.7044	0
	High	KLEEIEAK	1	1	1	O75179		0	41.99	0.000528064	2	959.539	-1.74059	11.0258	1
	High	DTALTIAADK	1	2	2	Q8IWZ3;O75179		0	41.08	0.000850015	2	1018.54	-3.37519	28.0153	0
Q14789	Golgin subfamily B member 1 OS=Homo sapiens GN=GOLGB1 PE=1 SV=2 - [GOGB1_HUMAN]	502.534	5.4	1	15	15	18	3259	375.79	4.99561
	A2	Sequence	# PSMs	# Proteins	# Protein Groups	Protein Group Accessions	Modifications	ΔCn	IonScore	Exp Value	Charge	MH+ [Da]	ΔM [ppm]	RT [min]	# Missed Cleavages
	High	LITSNTDASDGDSVALVK	2	1	1	Q14789		0	85.25	2.05991e-08	2	1805.92	2.54978	48.059	0
	High	DSLSEEVQDLK	3	1	1	Q14789		0	71.12	6.25871e-07	2	1262.61	-2.30428	60.9709	0
	High	VLLDDTQSEAAR	1	1	1	Q14789		0	68.54	1.17565e-06	2	1317.66	-2.09503	26.3872	0
	High	SLQEELSLAR	1	1	1	Q14789		0	53.24	4.38674e-05	2	1145.62	-0.95448	57.4463	0
	High	SSTEEEMEIEK	1	1	1	Q14789		0	52.62	9.84629e-06	2	1311.56	-3.86324	23.608	0
	High	DHANEELDELKR	1	1	1	Q14789		0	50.22	8.36532e-05	3	1468.7	-4.65401	22.4379	1
	High	EQVEEDNEVSSGLK	1	1	1	Q14789		0	47.76	8.37471e-05	2	1562.72	3.32938	25.4689	0
	High	VEELSQALSQK	1	1	1	Q14789		0	46.9	0.000242967	2	1231.65	-5.47685	37.0773	0
	High	IVGDYQQLEER	1	1	1	Q14789		0	43.63	0.000424841	2	1349.66	-3.99294	40.0991	0
	High	TGQELQSAcDALK	1	1	1	Q14789	C9(Carbamidomethyl)	0	42.81	0.00030107	2	1420.67	-3.08036	35.751	0
	High	ILELEEENDR	1	1	1	Q14789		0	41.79	0.000453618	2	1259.61	1.29675	36.7678	0
	High	GNLEGIIR	1	1	1	Q14789		0	39.77	0.000796062	2	871.5	-0.024036	37.2981	0
	High	LAAEEQFQALVK	1	1	1	Q14789		0	38.25	0.00100248	2	1346.74	5.15291	70.9662	0
	High	LDAELIQYR	1	1	1	Q14789		0	38	0.00109358	2	1120.6	-0.184184	54.289	0
	High	GALLLSSIELEELK	1	1	1	Q14789		0	35.87	0.000802346	2	1514.87	-1.18095	105.135	0
P51114	Fragile X mental retardation syndrome-related protein 1 OS=Homo sapiens GN=FXR1 PE=1 SV=3 - [FXR1_HUMAN]	493.8	30.11	1	11	13	19	621	69.6779	6.15088
	A2	Sequence	# PSMs	# Proteins	# Protein Groups	Protein Group Accessions	Modifications	ΔCn	IonScore	Exp Value	Charge	MH+ [Da]	ΔM [ppm]	RT [min]	# Missed Cleavages
	High	GFLEFVEDFIQVPR	2	1	1	P51114		0	73.33	2.99612e-07	2	1695.89	8.07464	114.467	0
	High	IYGESADAVKK	2	1	1	P51114		0	63.52	3.62374e-06	2	1180.62	-4.94951	11.8552	1
	High	VPGVTAIELDEDTGTFR	1	1	1	P51114		0	59.88	7.19611e-06	2	1819.91	4.19431	79.7441	0
	High	AINGPTSASGDDISK	1	1	1	P51114		0	58.36	9.70111e-06	2	1432.68	-5.06015	18.2412	0
	High	DPDSNPYSLLDNTESDQTADTDASESHHSTNR	2	1	1	P51114		0	56.69	6.11415e-07	4	3519.46	-0.127552	55.6001	0
	High	EDLMGLAIGTHGSNIQQAR	1	1	1	P51114		0	55.72	1.41996e-05	2	2011	-2.26595	66.9958	0
	High	KDELSDWSLAGEDDR	1	1	1	P51114		0	53.41	3.12385e-05	2	1735.77	-1.55649	59.5661	1
	High	ANDQEPcGWWLAK	2	1	1	P51114	C7(Carbamidomethyl)	0	52.78	1.31807e-05	2	1574.7	-0.839521	73.2901	0
	High	KVPGVTAIELDEDTGTFR	3	1	1	P51114		0	46.52	0.000144848	2	1948.01	2.60293	69.8824	1
	High	VNILSDMHLR	1	1	1	P51114		0	42.81	0.00034034	2	1197.64	-0.505087	62.9851	0
	High	GSNGAFYK	1	3	3	Q06787;P51114;P51116		0	42.31	0.000249683	2	843.398	-2.01157	12.7854	0
	High	VIQEIVDK	1	2	2	P51114;P51116		0	38.69	0.000851806	2	943.543	-2.94939	22.8227	0
	High	GPNYTSGYGTNSELSNPSETESER	1	1	1	P51114		0	36.46	0.000214646	2	2576.09	-6.50158	45.8001	0
P04264	Keratin, type II cytoskeletal 1 OS=Homo sapiens GN=KRT1 PE=1 SV=6 - [K2C1_HUMAN]	490.136	13.2	1	8	8	18	644	65.999	8.11865
	A2	Sequence	# PSMs	# Proteins	# Protein Groups	Protein Group Accessions	Modifications	ΔCn	IonScore	Exp Value	Charge	MH+ [Da]	ΔM [ppm]	RT [min]	# Missed Cleavages
	High	LNDLEDALQQAK	3	1	1	P04264		0	75.06	2.8226e-07	2	1357.7	-0.271881	60.7679	0
	High	SLNNQFASFIDK	1	1	1	P04264		0	67.05	1.57794e-06	2	1383.69	2.554	77.6173	0
	High	AEAESLYQSK	3	1	1	P04264		0	62.11	4.1832e-06	2	1125.54	-2.92595	17.3943	0
	High	SGGGFSSGSAGIINYQR	1	1	1	P04264		0	61.7	4.56356e-06	2	1657.79	-0.322901	50.835	0
	High	FLEQQNQVLQTK	3	2	1	P04264		0	61.35	6.44886e-06	2	1475.78	-3.71908	38.494	0
	High	SKAEAESLYQSK	3	1	1	P04264		0	48.78	9.73391e-05	2	1340.66	-5.86035	12.9175	1
	High	TNAENEFVTIK	2	1	1	P04264		0	46.07	0.000232342	2	1265.63	-4.24907	41.9814	0
	High	AQYEDIAQK	2	1	1	P04264		0	43.38	0.000330623	2	1065.52	-2.73597	16.6668	0
Q8WWM7	Ataxin-2-like protein OS=Homo sapiens GN=ATXN2L PE=1 SV=2 - [ATX2L_HUMAN]	484.771	9.3	1	9	9	18	1075	113.304	8.5874
	A2	Sequence	# PSMs	# Proteins	# Protein Groups	Protein Group Accessions	Modifications	ΔCn	IonScore	Exp Value	Charge	MH+ [Da]	ΔM [ppm]	RT [min]	# Missed Cleavages
	High	DKFTDSAIAMNSK	1	1	1	Q8WWM7		0	71.45	3.90298e-07	2	1427.68	-0.898466	32.6188	1
	High	GEDKDEGPVAEQVK	2	1	1	Q8WWM7		0	67.24	1.24607e-06	2	1500.71	-4.16997	11.9403	1
	High	PGAAAIGSAR	1	1	1	Q8WWM7		0	61.59	3.81384e-06	2	870.477	-2.40315	10.9282	0
	High	AEGLQVGQDAR	2	1	1	Q8WWM7		0	58.77	1.00882e-05	2	1143.58	-0.0860361	17.5068	0
	High	GPHHLDNSSPGPGSEAR	2	1	1	Q8WWM7		0	56.21	9.0946e-06	2	1714.78	-4.9289	9.77543	0
	High	FELAVDAVHR	5	1	1	Q8WWM7		0	54.55	2.59556e-05	2	1156.61	-3.04496	47.0433	0
	High	FTDSAIAMNSK	1	1	1	Q8WWM7		0	49.09	7.95353e-05	2	1184.56	0.439055	27.8231	0
	High	GPPQSPVFEGVYNNSR	3	1	1	Q8WWM7		0	48.71	9.35373e-05	2	1747.84	-1.18726	56.7417	0
	High	FNEENYGVK	1	1	1	Q8WWM7		0	40.67	0.000278537	2	1099.5	-4.07197	24.3641	0
P07437	Tubulin beta chain OS=Homo sapiens GN=TUBB PE=1 SV=2 - [TBB5_HUMAN]	480.68	22.52	1	1	8	14	444	49.639	4.89404
	A2	Sequence	# PSMs	# Proteins	# Protein Groups	Protein Group Accessions	Modifications	ΔCn	IonScore	Exp Value	Charge	MH+ [Da]	ΔM [ppm]	RT [min]	# Missed Cleavages
	High	IMNTFSVVPSPK	1	2	2	P07437;P68371		0	101.64	5.72383e-10	2	1319.71	2.27842	60.4162	0
	High	GHYTEGAELVDSVLDVVR	4	4	3	P07437;Q13885;P68371		0	90.52	5.94395e-09	2	1958.99	5.09833	109.18	0
	High	EIVHIQAGQcGNQIGAK	1	4	3	P68371;P07437;Q13885	C10(Carbamidomethyl)	0	71.14	6.1915e-07	2	1822.92	-2.42505	30.6229	0
	High	LAVNMVPFPR	3	4	3	P07437;Q13885;P68371		0	68.56	1.33046e-06	2	1143.63	-0.156018	75.9487	0
	High	ISVYYNEATGGK	1	1	1	P07437		0	56.06	1.57316e-05	2	1301.63	-3.08458	33.7681	0
	High	FPGQLNADLR	2	4	3	P07437;Q13885;P68371		0	49.65	0.000126277	2	1130.6	0.79401	51.1265	0
	High	EVDEQMLNVQNK	1	4	3	P07437;Q13885;P68371		0	38.58	0.0010054	2	1446.69	1.25694	36.6077	0
	High	NMMAAcDPR	1	4	3	P07437;Q13885;P68371	C6(Carbamidomethyl)	0	37.67	0.000188102	2	1065.42	-3.52127	17.8398	0
P05787	Keratin, type II cytoskeletal 8 OS=Homo sapiens GN=KRT8 PE=1 SV=7 - [K2C8_HUMAN]	466.419	22.77	1	9	10	17	483	53.6711	5.59229
	A2	Sequence	# PSMs	# Proteins	# Protein Groups	Protein Group Accessions	Modifications	ΔCn	IonScore	Exp Value	Charge	MH+ [Da]	ΔM [ppm]	RT [min]	# Missed Cleavages
	High	LSELEAALQR	2	1	1	P05787		0	80.31	9.54386e-08	2	1129.62	-1.04335	53.3611	0
	High	LEAELGNMQGLVEDFK	2	1	1	P05787		0	73.2	3.37434e-07	2	1792.87	-2.09483	106.102	0
	High	SLDMDSIIAEVK	2	1	1	P05787		0	65.03	2.85786e-06	2	1320.67	0.875153	95.5342	0
	High	YEELQSLAGK	2	1	1	P05787		0	53.15	4.74489e-05	2	1137.57	-4.838	37.2519	0
	High	LLEGEESR	1	3	3	P05787;P08670;P08729		0	53.05	5.37563e-05	2	932.464	-4.54964	12.4644	0
	High	TEMENEFVLIK	1	1	1	P05787		0	51.22	6.90909e-05	2	1352.67	-1.36693	75.6863	0
	High	ASLEAAIADAEQR	3	1	1	P05787		0	51.14	6.03767e-05	2	1344.67	-1.54228	64.9432	0
	High	LEGLTDEINFLR	1	1	1	P05787		0	50.8	5.9887e-05	2	1419.76	5.73179	98.5348	0
	High	QLYEEEIR	2	1	1	P05787		0	46.76	0.000226678	2	1079.53	-4.30669	31.4479	0
	High	TKTEISEMNR	1	1	1	P05787		0	42.66	0.000368561	2	1208.59	-4.32619	11.3045	1
P68371	Tubulin beta-2C chain OS=Homo sapiens GN=TUBB2C PE=1 SV=1 - [TBB2C_HUMAN]	465.711	23.15	1	1	8	14	445	49.799	4.89404
	A2	Sequence	# PSMs	# Proteins	# Protein Groups	Protein Group Accessions	Modifications	ΔCn	IonScore	Exp Value	Charge	MH+ [Da]	ΔM [ppm]	RT [min]	# Missed Cleavages
	High	IMNTFSVVPSPK	1	2	2	P07437;P68371		0	101.64	5.72383e-10	2	1319.71	2.27842	60.4162	0
	High	GHYTEGAELVDSVLDVVR	4	4	3	P07437;Q13885;P68371		0	90.52	5.94395e-09	2	1958.99	5.09833	109.18	0
	High	EIVHLQAGQcGNQIGAK	1	4	3	P68371;P07437;Q13885	C10(Carbamidomethyl)	0	71.14	6.1915e-07	2	1822.92	-2.42505	30.6229	0
	High	LAVNMVPFPR	3	4	3	P07437;Q13885;P68371		0	68.56	1.33046e-06	2	1143.63	-0.156018	75.9487	0
	High	FPGQLNADLR	2	4	3	P07437;Q13885;P68371		0	49.65	0.000126277	2	1130.6	0.79401	51.1265	0
	High	EVDEQMLNVQNK	1	4	3	P07437;Q13885;P68371		0	38.58	0.0010054	2	1446.69	1.25694	36.6077	0
	High	ALTVPELTQQMFDAK	1	1	1	P68371		0	38.27	0.00125106	2	1691.87	3.81565	101.315	0
	High	NMMAAcDPR	1	4	3	P07437;Q13885;P68371	C6(Carbamidomethyl)	0	37.67	0.000188102	2	1065.42	-3.52127	17.8398	0
Q8N6T3	ADP-ribosylation factor GTPase-activating protein 1 OS=Homo sapiens GN=ARFGAP1 PE=1 SV=2 - [ARFG1_HUMAN]	459.685	21.43	1	6	6	15	406	44.6403	5.65576
	A2	Sequence	# PSMs	# Proteins	# Protein Groups	Protein Group Accessions	Modifications	ΔCn	IonScore	Exp Value	Charge	MH+ [Da]	ΔM [ppm]	RT [min]	# Missed Cleavages
	High	SPSSDSWTcADTSTER	4	1	1	Q8N6T3	C9(Carbamidomethyl)	0	91.24	4.50974e-10	2	1786.72	2.75419	27.977	0
	High	VSGQPQSVTASSDK	1	1	1	Q8N6T3		0	71.95	4.08489e-07	2	1390.68	-4.18852	10.4453	0
	High	AFEDWLNDDLGSYQGAQGNR	2	1	1	Q8N6T3		0	63.5	1.34005e-06	2	2256	4.26378	97.3985	0
	High	IFDDVSSGVSQLASK	1	1	1	Q8N6T3		0	55.14	1.94435e-05	2	1552.78	-3.19311	68.9937	0
	High	YVGFGNTPPPQK	4	1	1	Q8N6T3		0	51.95	6.38263e-05	2	1304.66	-0.306465	30.2488	0
	High	DKVVALAEGR	3	1	1	Q8N6T3		0	44.85	0.000281513	2	1057.6	-2.38231	20.0084	1
Q96A49	Synapse-associated protein 1 OS=Homo sapiens GN=SYAP1 PE=1 SV=1 - [SYAP1_HUMAN]	420.577	26.42	1	7	7	15	352	39.9089	4.52588
	A2	Sequence	# PSMs	# Proteins	# Protein Groups	Protein Group Accessions	Modifications	ΔCn	IonScore	Exp Value	Charge	MH+ [Da]	ΔM [ppm]	RT [min]	# Missed Cleavages
	High	QEETAVLEEDSADWEK	1	1	1	Q96A49		0	68.97	3.92972e-07	2	1878.83	1.08903	63.1699	0
	High	ELQQELQEYEVVTESEK	2	1	1	Q96A49		0	65.5	1.46556e-06	2	2080.99	-1.02041	81.0069	0
	High	ITESVAETAQTIK	3	1	1	Q96A49		0	62.73	4.37335e-06	2	1390.74	-2.97141	33.7728	0
	High	SVEEGKIDGIIDK	3	1	1	Q96A49		0	55.7	2.38201e-05	2	1402.74	1.0428	36.9111	1
	High	QSAQLTALAAQQQAAGK	2	1	1	Q96A49		0	55.63	1.61381e-05	3	1684.89	-2.54291	36.5606	0
	High	TPPVVIK	3	1	1	Q96A49		0	36.18	8.43467e-05	2	753.489	2.08451	17.533	0
	High	DENWDKEIEK	1	1	1	Q96A49		0	34.32	0.00133138	2	1305.59	-2.37619	31.1611	1
Q13885	Tubulin beta-2A chain OS=Homo sapiens GN=TUBB2A PE=1 SV=1 - [TBB2A_HUMAN]	406.809	19.78	2	1	7	13	445	49.875	4.89404
	A2	Sequence	# PSMs	# Proteins	# Protein Groups	Protein Group Accessions	Modifications	ΔCn	IonScore	Exp Value	Charge	MH+ [Da]	ΔM [ppm]	RT [min]	# Missed Cleavages
	High	GHYTEGAELVDSVLDVVR	4	4	3	P07437;Q13885;P68371		0	90.52	5.94395e-09	2	1958.99	5.09833	109.18	0
	High	EIVHIQAGQcGNQIGAK	1	4	3	P68371;P07437;Q13885	C10(Carbamidomethyl)	0	71.14	6.1915e-07	2	1822.92	-2.42505	30.6229	0
	High	LAVNMVPFPR	3	4	3	P07437;Q13885;P68371		0	68.56	1.33046e-06	2	1143.63	-0.156018	75.9487	0
	High	IMNTFSVMPSPK	1	2	1	Q13885		0	54.59	3.02356e-05	2	1351.68	3.1024	63.1633	0
	High	FPGQLNADLR	2	4	3	P07437;Q13885;P68371		0	49.65	0.000126277	2	1130.6	0.79401	51.1265	0
	High	EVDEQMLNVQNK	1	4	3	P07437;Q13885;P68371		0	38.58	0.0010054	2	1446.69	1.25694	36.6077	0
	High	NMMAAcDPR	1	4	3	P07437;Q13885;P68371	C6(Carbamidomethyl)	0	37.67	0.000188102	2	1065.42	-3.52127	17.8398	0
P51116	Fragile X mental retardation syndrome-related protein 2 OS=Homo sapiens GN=FXR2 PE=1 SV=2 - [FXR2_HUMAN]	340.046	21.55	1	10	12	14	673	74.178	6.22705
	A2	Sequence	# PSMs	# Proteins	# Protein Groups	Protein Group Accessions	Modifications	ΔCn	IonScore	Exp Value	Charge	MH+ [Da]	ΔM [ppm]	RT [min]	# Missed Cleavages
	High	SYLEFSEDSVQVPR	1	1	1	P51116		0	60.17	5.76967e-06	2	1655.8	4.48743	76.1149	0
	High	YNSSSISSVLK	1	1	1	P51116		0	58.69	8.51806e-06	2	1184.61	-1.54658	45.1706	0
	High	QPVTVADYISR	1	1	1	P51116		0	55.46	2.60268e-05	2	1248.66	2.3875	53.2855	0
	High	TGGPAYGPSSDVSTASETESEK	3	1	1	P51116		0	50.97	1.71964e-05	2	2156.94	-4.46095	30.7078	0
	High	ASLLGDMHFR	1	1	1	P51116		0	47.58	0.00017982	3	1146.58	2.59233	61.0429	0
	High	TKPSEDSLSGQK	1	1	1	P51116		0	47.15	0.000166731	2	1276.63	-2.58504	9.56667	1
	High	AGYSTDESSSSSLHATR	1	1	1	P51116		0	45.66	7.47021e-05	2	1755.77	-3.44068	14.1905	0
	High	VTMAVPEDLR	1	1	1	P51116		0	43.05	0.000512791	2	1130.59	1.47501	50.2615	0
	High	GSNGAFYK	1	3	3	Q06787;P51114;P51116		0	42.31	0.000249683	2	843.398	-2.01157	12.7854	0
	High	IYGETPEAcR	1	1	1	P51116	C9(Carbamidomethyl)	0	39.51	0.0003974	2	1195.54	-2.70492	17.7899	0
	High	VIQEIVDK	1	2	2	P51114;P51116		0	38.69	0.000851806	2	943.543	-2.94939	22.8227	0
	High	LRPVNPNPLATK	1	1	1	P51116		0	37.77	0.000292441	2	1319.78	-1.47592	28.0724	1
P43243	Matrin-3 OS=Homo sapiens GN=MATR3 PE=1 SV=2 - [MATR3_HUMAN]	337.4	13.22	1	10	10	12	847	94.5648	6.25244
	A2	Sequence	# PSMs	# Proteins	# Protein Groups	Protein Group Accessions	Modifications	ΔCn	IonScore	Exp Value	Charge	MH+ [Da]	ΔM [ppm]	RT [min]	# Missed Cleavages
	High	GNLGAGNGNLQGPR	2	1	1	P43243		0	76.69	1.44645e-07	2	1324.67	-3.61871	19.0853	0
	High	IEELDQENEAALENGIK	1	1	1	P43243		0	64.85	2.19318e-06	2	1914.93	2.77009	62.5013	0
	High	GDADQASNILASFGLSAR	1	1	1	P43243		0	62.95	3.67568e-06	2	1792.88	-1.64378	107.898	0
	High	SFQQSSLSR	2	1	1	P43243		0	52.39	5.39277e-05	2	1039.51	-2.07533	15.942	0
	High	TEEGPTLSYGR	1	1	1	P43243		0	48.75	9.40133e-05	2	1209.57	-2.23574	26.8579	0
	High	LcSLFYTNEEVAK	1	1	1	P43243	C2(Carbamidomethyl)	0	44.89	0.000201091	2	1573.76	0.100547	63.1467	0
	High	GPGPLQER	1	1	1	P43243		0	42.04	0.000350097	2	853.451	-2.43972	12.5099	0
	High	RTEEGPTLSYGR	1	1	1	P43243		0	39.04	0.000966722	2	1365.68	-0.226014	20.6677	1
	High	ITPENLPQILLQLK	1	1	1	P43243		0	33.99	0.000239415	2	1619.97	0.860263	110.115	0
	High	MDYEDDR	1	1	1	P43243		0	32.99	0.000150703	2	943.343	-3.48568	13.0623	0
Q14677	Clathrin interactor 1 OS=Homo sapiens GN=CLINT1 PE=1 SV=1 - [EPN4_HUMAN]	334.306	9.76	1	5	5	13	625	68.2158	6.41748
	A2	Sequence	# PSMs	# Proteins	# Protein Groups	Protein Group Accessions	Modifications	ΔCn	IonScore	Exp Value	Charge	MH+ [Da]	ΔM [ppm]	RT [min]	# Missed Cleavages
	High	YVGVSSDSVGGFR	5	1	1	Q14677		0	56.74	1.52522e-05	2	1329.64	-1.60069	47.891	0
	High	ELVEFAQDDDR	5	1	1	Q14677		0	54.37	1.29786e-05	2	1336.6	-1.28699	42.8265	0
	High	QDAFANFANFSK	1	1	1	Q14677		0	53.43	2.13353e-05	2	1359.64	2.87948	76.7688	0
	High	ATNVVMNYSEIESK	1	1	1	Q14677		0	49.54	6.33687e-05	2	1584.75	-3.21461	52.8357	0
	High	IGSTIDDTISK	1	1	1	Q14677		0	48.47	0.000131565	2	1149.6	-4.06311	26.6747	0
P0C2W1	F-box/SPRY domain-containing protein 1 OS=Homo sapiens GN=FBXO45 PE=1 SV=1 - [FBSP1_HUMAN]	330.446	22.38	1	6	6	13	286	30.6132	7.82568
	A2	Sequence	# PSMs	# Proteins	# Protein Groups	Protein Group Accessions	Modifications	ΔCn	IonScore	Exp Value	Charge	MH+ [Da]	ΔM [ppm]	RT [min]	# Missed Cleavages
	High	SKP	5	1	1	P0C2W1		0	79.85	1.24217e-07	2	1158.6	5.06987	99.7332	0
	High	TDILcNLPSYK	2	1	1	P0C2W1	C5(Carbamidomethyl)	0	52.72	4.43688e-05	2	1323.67	4.20228	68.2878	0
	High	AFQHAFSTNDcSR	2	1	1	P0C2W1	C11(Carbamidomethyl)	0	47.6	3.21493e-05	3	1540.66	-2.84012	20.6492	0
	High	NGFTLHR	1	1	1	P0C2W1		0	47.06	0.000143656	2	844.442	-0.952518	15.8292	0
	High	NPIAQSTDGAR	1	1	1	P0C2W1		0	45.75	0.000134367	2	1129.56	-3.73048	11.2291	0
	High	cLHGDENSEVWR	2	1	1	P0C2W1	C1(Carbamidomethyl)	0	36.61	0.000436546	3	1501.64	-4.80711	24.7958	0
Q9Y520	Protein BAT2-like 2 OS=Homo sapiens GN=BAT2L2 PE=1 SV=2 - [BA2L2_HUMAN]	324.496	3.52	1	8	8	13	2897	316.845	9.12939
	A2	Sequence	# PSMs	# Proteins	# Protein Groups	Protein Group Accessions	Modifications	ΔCn	IonScore	Exp Value	Charge	MH+ [Da]	ΔM [ppm]	RT [min]	# Missed Cleavages
	High	DHAISLSEPR	2	1	1	Q9Y520		0	62.73	4.05335e-06	2	1124.56	-4.12992	21.9001	0
	High	TVNQQTMAAPVVK	1	1	1	Q9Y520		0	56.71	1.83442e-05	2	1386.74	-3.09314	26.1815	0
	High	LPSAQTPNGTDYVASGK	1	1	1	Q9Y520		0	54.76	2.72369e-05	2	1705.84	-0.465926	34.2603	0
	High	GPSFNQER	2	1	1	Q9Y520		0	52.33	4.29821e-05	2	934.434	-4.2784	12.0313	0
	High	QQSEISAAVER	1	1	1	Q9Y520		0	52.2	5.2724e-05	2	1217.61	-3.712	22.0284	0
	High	ATEEPEDVR	1	1	1	Q9Y520		0	50.13	3.29973e-05	2	1045.48	-4.24111	11.1884	0
	High	PAVLSGYFK	3	1	1	Q9Y520		0	45.83	0.000155424	2	981.541	0.146344	57.4684	0
	High	SVEDVRPHHTDANNQSAcFEAPDQK	2	1	1	Q9Y520	C18(Carbamidomethyl)	0	32.76	0.000926911	4	2852.28	4.67413	24.991	1
P02768	Serum albumin OS=Homo sapiens GN=ALB PE=1 SV=2 - [ALBU_HUMAN]	322.898	6.24	1	5	5	16	609	69.3215	6.27783
	A2	Sequence	# PSMs	# Proteins	# Protein Groups	Protein Group Accessions	Modifications	ΔCn	IonScore	Exp Value	Charge	MH+ [Da]	ΔM [ppm]	RT [min]	# Missed Cleavages
	High	KVPQVSTPTLVEVSR	4	1	1	P02768		0	59.43	2.16647e-06	3	1639.94	-0.137879	49.8688	1
	High	ccTESLVNR	7	1	1	P02768	C1(Carbamidomethyl); C2(Carbamidomethyl)	0	48.21	4.83226e-05	2	1138.49	-4.31246	17.6397	0
	High	YLYEIAR	2	1	1	P02768		0	41.67	0.000541212	2	927.492	-1.91432	42.9501	0
	High	LVTDLTK	1	1	1	P02768		0	40.76	0.000474295	2	789.47	-2.02916	20.7904	0
	High	VPQVSTPTLVEVSR	2	1	1	P02768		0	38.82	0.00072171	2	1511.84	-2.11933	58.3607	0
Q9Y5A9	YTH domain family protein 2 OS=Homo sapiens GN=YTHDF2 PE=1 SV=2 - [YTHD2_HUMAN]	309.238	18.13	1	7	8	11	579	62.2957	8.79248
	A2	Sequence	# PSMs	# Proteins	# Protein Groups	Protein Group Accessions	Modifications	ΔCn	IonScore	Exp Value	Charge	MH+ [Da]	ΔM [ppm]	RT [min]	# Missed Cleavages
	High	APGMNTIDQGMAALK	2	1	1	Q9Y5A9		0	71.37	5.17915e-07	2	1517.74	-2.89315	70.7798	0
	High	LENNENKPVTNSR	1	1	1	Q9Y5A9		0	65.23	2.17439e-06	2	1514.75	-5.50401	8.98025	1
	High	LGSTEVASNVPK	1	1	1	Q9Y5A9		0	53.06	4.42408e-05	2	1201.64	0.32996	23.566	0
	High	HNMDIGTWDNK	1	1	1	Q9Y5A9		0	44.48	0.0001105	2	1330.58	-2.01911	32.8869	0
	High	SYSEDDIHR	1	2	2	Q9Y5A9;Q7Z739		0	44.17	0.000122504	2	1121.48	-3.42414	12.1832	0
	High	SAVDYNTcAGVWSQDK	2	1	1	Q9Y5A9	C8(Carbamidomethyl)	0	42.66	0.00011924	2	1800.78	-2.23204	50.6586	0
	High	YNIWcSTEHGNK	1	1	1	Q9Y5A9	C5(Carbamidomethyl)	0	42.54	0.000122581	2	1508.65	-3.30837	31.7116	0
	High	DGLNDDDFEPYLSPQAR	2	1	1	Q9Y5A9		0	40.75	0.000256626	2	1951.86	-2.08556	81.9189	0
P62829	60S ribosomal protein L23 OS=Homo sapiens GN=RPL23 PE=1 SV=1 - [RL23_HUMAN]	301.139	10.71	1	1	1	8	140	14.8561	10.5063
	A2	Sequence	# PSMs	# Proteins	# Protein Groups	Protein Group Accessions	Modifications	ΔCn	IonScore	Exp Value	Charge	MH+ [Da]	ΔM [ppm]	RT [min]	# Missed Cleavages
	High	LPAAGVGDMVMATVK	8	1	1	P62829		0	87.37	1.63992e-08	2	1459.77	0.318605	79.6028	0
Q92499	ATP-dependent RNA helicase DDX1 OS=Homo sapiens GN=DDX1 PE=1 SV=2 - [DDX1_HUMAN]	298.194	14.46	1	9	9	13	740	82.3798	7.2251
	A2	Sequence	# PSMs	# Proteins	# Protein Groups	Protein Group Accessions	Modifications	ΔCn	IonScore	Exp Value	Charge	MH+ [Da]	ΔM [ppm]	RT [min]	# Missed Cleavages
	High	ELAEQTLNNIK	5	1	1	Q92499		0	69.19	1.09056e-06	2	1272.68	-0.839941	41.7183	0
	High	FLVLDEADGLLSQGYSDFINR	1	1	1	Q92499		0	53.42	1.95645e-05	3	2372.19	4.68435	112.296	0
	High	TGASVLNK	1	1	1	Q92499		0	51.9	7.78013e-05	2	789.443	-4.96272	10.6975	0
	High	FNFGEEEFK	1	1	1	Q92499		0	43.36	0.000117636	2	1146.51	-3.27427	63.2054	0
	High	VPVDEFDGK	1	1	1	Q92499		0	42.72	0.00053991	2	1005.49	-2.7865	26.5674	0
	High	LDDLVSTGK	1	1	1	Q92499		0	41.63	0.00075234	2	947.5	-4.2612	23.4806	0
	High	GHVDILAPTVQELAALEK	1	1	1	Q92499		0	40.79	0.00020842	3	1904.06	4.26912	100.283	0
	High	DGFVALSK	1	1	1	Q92499		0	40.15	0.000840464	2	836.452	0.935697	34.8561	0
	High	HYYEVScHDQGLcR	1	1	1	Q92499	C7(Carbamidomethyl); C13(Carbamidomethyl)	0	32.53	0.00055847	3	1823.75	-2.62471	25.1325	0
Q13148	TAR DNA-binding protein 43 OS=Homo sapiens GN=TARDBP PE=1 SV=1 - [TADBP_HUMAN]	296.104	24.64	1	9	9	10	414	44.7113	6.18896
	A2	Sequence	# PSMs	# Proteins	# Protein Groups	Protein Group Accessions	Modifications	ΔCn	IonScore	Exp Value	Charge	MH+ [Da]	ΔM [ppm]	RT [min]	# Missed Cleavages
	High	MDETDASSAVK	1	1	1	Q13148		0	81.15	2.95434e-08	2	1153.5	-2.12806	14.0138	0
	High	KMDETDASSAVK	1	1	1	Q13148		0	79.28	6.07865e-08	2	1281.59	-4.48653	10.6241	1
	High	FGGNPGGFGNQGGFGNSR	1	1	1	Q13148		0	58.36	3.86586e-06	2	1726.76	-4.61666	48.2792	0
	High	TSDLIVLGLPWK	1	1	1	Q13148		0	51.96	2.70638e-05	2	1341.78	1.29324	107.994	0
	High	AFAFVTFADDQIAQSLcGEDLIIK	1	1	1	Q13148	C17(Carbamidomethyl)	0	43.04	0.000206086	3	2672.34	3.02517	112.392	0
	High	QSQDEPLR	1	1	1	Q13148		0	42.71	0.000294688	2	972.471	-3.77236	10.5635	0
	High	FTEYETQVK	1	1	1	Q13148		0	40.12	0.000549602	2	1144.55	-3.89349	23.7305	0
	High	cTEDMTEDELR	2	1	1	Q13148	C1(Carbamidomethyl)	0	36.72	0.00014897	2	1398.55	2.66986	27.8296	0
	High	NPVSQcMR	1	1	1	Q13148	C6(Carbamidomethyl)	0	34.74	0.000788983	2	991.441	-3.66698	12.4687	0
Q07020	60S ribosomal protein L18 OS=Homo sapiens GN=RPL18 PE=1 SV=2 - [RL18_HUMAN]	292.016	18.62	1	3	3	9	188	21.6211	11.7222
	A2	Sequence	# PSMs	# Proteins	# Protein Groups	Protein Group Accessions	Modifications	ΔCn	IonScore	Exp Value	Charge	MH+ [Da]	ΔM [ppm]	RT [min]	# Missed Cleavages
	High	TNSTFNQVVLK	5	1	1	Q07020		0	73.26	3.18643e-07	2	1250.67	-2.1261	40.3385	0
	High	GcGTVLLSGPR	1	1	1	Q07020	C2(Carbamidomethyl)	0	69.25	1.19444e-06	2	1116.58	-3.50726	33.3571	0
	High	ILTFDQLALDSPK	3	1	1	Q07020		0	66.03	1.77116e-06	2	1460.8	-2.32827	89.7577	0
P30050	60S ribosomal protein L12 OS=Homo sapiens GN=RPL12 PE=1 SV=1 - [RL12_HUMAN]	290.444	33.33	1	4	4	9	165	17.8075	9.42236
	A2	Sequence	# PSMs	# Proteins	# Protein Groups	Protein Group Accessions	Modifications	ΔCn	IonScore	Exp Value	Charge	MH+ [Da]	ΔM [ppm]	RT [min]	# Missed Cleavages
	High	cTGGEVGATSALAPK	1	1	1	P30050	C1(Carbamidomethyl)	0	100.05	7.16701e-10	2	1418.69	-0.0717306	26.1214	0
	High	EILGTAQSVGcNVDGR	1	1	1	P30050	C11(Carbamidomethyl)	0	59.11	1.0065e-05	2	1675.81	1.62465	44.8939	0
	High	IGPLGLSPK	4	1	1	P30050		0	51.61	6.55728e-06	2	881.544	-1.60663	41.8764	0
	High	HSGNITFDEIVNIAR	3	1	1	P30050		0	51.42	5.40831e-05	3	1685.87	4.1264	91.1344	0
Q8WUH6	UPF0444 transmembrane protein C12orf23 OS=Homo sapiens GN=C12orf23 PE=1 SV=1 - [CL023_HUMAN]	289.019	17.24	1	1	1	8	116	11.7411	9.31982
	A2	Sequence	# PSMs	# Proteins	# Protein Groups	Protein Group Accessions	Modifications	ΔCn	IonScore	Exp Value	Charge	MH+ [Da]	ΔM [ppm]	RT [min]	# Missed Cleavages
	High	GGVSAVAGGVTAVGSAVVNK	8	1	1	Q8WUH6		0	71.26	3.21713e-07	2	1699.93	-2.9841	67.8867	0
P11142	Heat shock cognate 71 kDa protein OS=Homo sapiens GN=HSPA8 PE=1 SV=1 - [HSP7C_HUMAN]	284.027	5.11	1	2	3	10	646	70.8542	5.51611
	A2	Sequence	# PSMs	# Proteins	# Protein Groups	Protein Group Accessions	Modifications	ΔCn	IonScore	Exp Value	Charge	MH+ [Da]	ΔM [ppm]	RT [min]	# Missed Cleavages
	High	DAGTIAGLNVLR	6	1	1	P11142		0	66.94	1.54761e-06	2	1199.67	-3.43235	71.8883	0
	High	FEELNADLFR	1	1	1	P11142		0	57.23	1.78826e-05	2	1253.62	2.82	79.4077	0
	High	VEIIANDQGNR	3	5	3	P08107;P11021;P11142		0	55.61	2.33571e-05	2	1228.62	-4.67129	19.162	0
Q9BWF3	RNA-binding protein 4 OS=Homo sapiens GN=RBM4 PE=1 SV=1 - [RBM4_HUMAN]	276.18	21.98	1	7	7	10	364	40.2887	7.07861
	A2	Sequence	# PSMs	# Proteins	# Protein Groups	Protein Group Accessions	Modifications	ΔCn	IonScore	Exp Value	Charge	MH+ [Da]	ΔM [ppm]	RT [min]	# Missed Cleavages
	High	GLDNTEFQGK	1	1	1	Q9BWF3		0	63.7	2.7941e-06	2	1108.52	-3.92477	23.0886	0
	High	NYGFVHIEDK	1	1	1	Q9BWF3		0	56.57	1.66321e-05	2	1221.59	-3.50562	37.9414	0
	High	LFIGNLPR	1	1	1	Q9BWF3		0	52.47	3.87874e-05	2	929.561	4.1893	61.3162	0
	High	VADLTEQYNEQYGAVR	2	1	1	Q9BWF3		0	52.07	3.29061e-05	2	1855.88	-2.57257	52.0342	0
	High	AEDAVEAIR	1	1	1	Q9BWF3		0	49.09	9.98815e-05	2	973.492	-2.86313	21.0674	0
	High	FEEYGPVIEcDIVK	3	1	1	Q9BWF3	C10(Carbamidomethyl)	0	48.6	9.31759e-05	2	1697.81	2.13006	77.2969	0
	High	TAPGMGDQSGcYR	1	1	1	Q9BWF3	C11(Carbamidomethyl)	0	35.09	0.000325229	2	1399.57	-4.92128	17.6423	0
Q04695	Keratin, type I cytoskeletal 17 OS=Homo sapiens GN=KRT17 PE=1 SV=2 - [K1C17_HUMAN]	273.109	11.81	1	4	5	10	432	48.076	5.021
	A2	Sequence	# PSMs	# Proteins	# Protein Groups	Protein Group Accessions	Modifications	ΔCn	IonScore	Exp Value	Charge	MH+ [Da]	ΔM [ppm]	RT [min]	# Missed Cleavages
	High	ALEEANTELEVK	2	1	1	Q04695		0	75.31	2.81192e-07	2	1345.68	-5.35458	36.454	0
	High	ASLEGNLAETENR	2	1	1	Q04695		0	64.38	2.15205e-06	2	1403.68	0.444626	32.3512	0
	High	DAEDWFFSK	3	1	1	Q04695		0	52.33	1.75437e-05	2	1144.49	-1.87162	86.8125	0
	High	TIVEEVQDGK	1	1	1	Q04695		0	50.35	0.000102867	2	1117.57	-3.88328	26.4309	0
	High	LAADDFR	2	3	3	P13645;Q04695;P05783		0	42.03	0.000676743	2	807.398	-2.20163	25.0609	0
P78344	Eukaryotic translation initiation factor 4 gamma 2 OS=Homo sapiens GN=EIF4G2 PE=1 SV=1 - [IF4G2_HUMAN]	267.403	5.18	1	4	4	9	907	102.297	7.13721
	A2	Sequence	# PSMs	# Proteins	# Protein Groups	Protein Group Accessions	Modifications	ΔCn	IonScore	Exp Value	Charge	MH+ [Da]	ΔM [ppm]	RT [min]	# Missed Cleavages
	High	LAEDAPNFDGPAAEGQPGQK	5	1	1	P78344		0	77.19	9.0718e-08	2	2011.93	-1.38294	41.5951	0
	High	TAGNSEFLGK	1	1	1	P78344		0	60.27	7.42381e-06	2	1023.51	-2.67824	19.5825	0
	High	LEVDIPLVK	2	1	1	P78344		0	39.91	0.000142932	2	1025.63	2.98702	75.8854	0
	High	VIILSLDR	1	1	1	P78344		0	34.39	0.00118272	2	928.58	-2.31468	61.6304	0
P62249	40S ribosomal protein S16 OS=Homo sapiens GN=RPS16 PE=1 SV=2 - [RS16_HUMAN]	266.002	24.66	1	4	4	9	146	16.435	10.2134
	A2	Sequence	# PSMs	# Proteins	# Protein Groups	Protein Group Accessions	Modifications	ΔCn	IonScore	Exp Value	Charge	MH+ [Da]	ΔM [ppm]	RT [min]	# Missed Cleavages
	High	GPLQSVQVFGR	6	1	1	P62249		0	62.57	5.03549e-06	2	1187.65	-4.88767	61.7463	0
	High	LLEPVLLLGK	1	1	1	P62249		0	49.83	2.96713e-06	2	1094.72	4.24652	93.7497	0
	High	FAGVDIR	1	1	1	P62249		0	44.89	0.000450832	2	777.423	-2.99584	36.5737	0
	High	TLLVADPR	1	1	1	P62249		0	38.5	0.000776896	2	884.517	-3.35199	30.3041	0
P35527	Keratin, type I cytoskeletal 9 OS=Homo sapiens GN=KRT9 PE=1 SV=3 - [K1C9_HUMAN]	265.493	14.45	1	5	5	6	623	62.0268	5.23682
	A2	Sequence	# PSMs	# Proteins	# Protein Groups	Protein Group Accessions	Modifications	ΔCn	IonScore	Exp Value	Charge	MH+ [Da]	ΔM [ppm]	RT [min]	# Missed Cleavages
	High	GGSGGSYGGGGSGGGYGGGSGSR	1	1	1	P35527		0	84.71	1.69032e-09	2	1791.72	-4.48013	11.1938	0
	High	FSSSSGYGGGSSR	2	1	1	P35527		0	79.47	2.2031e-08	2	1235.52	-3.08481	11.831	0
	High	VQALEEANNDLENK	1	1	1	P35527		0	58.92	9.23278e-06	2	1586.76	-0.729367	36.875	0
	High	QGVDADINGLR	1	1	1	P35527		0	48.96	8.38579e-05	2	1157.59	-4.43014	37.5362	0
	High	DIENQYETQITQIEHEVSSSGQEVQSSAK	1	1	1	P35527		0	36.45	0.000622777	3	3264.51	-2.19397	107.629	0
P50991	T-complex protein 1 subunit delta OS=Homo sapiens GN=CCT4 PE=1 SV=4 - [TCPD_HUMAN]	263.22	12.62	1	5	5	8	539	57.8878	7.82568
	A2	Sequence	# PSMs	# Proteins	# Protein Groups	Protein Group Accessions	Modifications	ΔCn	IonScore	Exp Value	Charge	MH+ [Da]	ΔM [ppm]	RT [min]	# Missed Cleavages
	High	GDVTITNDGATILK	3	1	1	P50991		0	75.42	2.62676e-07	2	1417.75	-3.20537	52.0845	0
	High	LGGTIDDcELVEGLVLTQK	2	1	1	P50991	C8(Carbamidomethyl)	0	59.83	7.22745e-06	2	2060.05	-4.00622	106.095	0
	High	ETLLNSATTSLNSK	1	1	1	P50991		0	55.81	1.8632e-05	2	1478.77	-2.8272	51.2953	0
	High	VIDPATATSVDLR	1	1	1	P50991		0	50.53	8.14306e-05	2	1357.72	-6.39523	52.4391	0
	High	FSNISAAK	1	1	1	P50991		0	45.64	0.000276991	2	837.444	-2.63755	12.6652	0
P50914	60S ribosomal protein L14 OS=Homo sapiens GN=RPL14 PE=1 SV=4 - [RL14_HUMAN]	262.853	10.7	1	2	2	7	215	23.417	10.9312
	A2	Sequence	# PSMs	# Proteins	# Protein Groups	Protein Group Accessions	Modifications	ΔCn	IonScore	Exp Value	Charge	MH+ [Da]	ΔM [ppm]	RT [min]	# Missed Cleavages
	High	LVAIVDVIDQNR	2	1	1	P50914		0	78.63	5.00372e-08	2	1354.77	-0.715521	80.0447	0
	High	ALVDGPcTQVR	5	1	1	P50914	C7(Carbamidomethyl)	0	67.07	1.54124e-06	2	1215.61	-3.66236	26.5652	0
P62241	40S ribosomal protein S8 OS=Homo sapiens GN=RPS8 PE=1 SV=2 - [RS8_HUMAN]	258.734	18.75	1	3	3	7	208	24.1902	10.3159
	A2	Sequence	# PSMs	# Proteins	# Protein Groups	Protein Group Accessions	Modifications	ΔCn	IonScore	Exp Value	Charge	MH+ [Da]	ΔM [ppm]	RT [min]	# Missed Cleavages
	High	LDVGNFSWGSEccTR	2	1	1	P62241	C12(Carbamidomethyl); C13(Carbamidomethyl)	0	68.54	1.39959e-07	2	1787.74	-1.60019	77.3442	0
	High	ADGYVLEGK	2	1	1	P62241		0	63.89	3.81779e-06	2	951.475	-3.62832	22.2992	0
	High	IIDVVYNASNNELVR	3	1	1	P62241		0	62.27	4.20977e-06	2	1718.9	-2.60849	70.7511	0
Q13283	Ras GTPase-activating protein-binding protein 1 OS=Homo sapiens GN=G3BP1 PE=1 SV=1 - [G3BP1_HUMAN]	258.19	24.25	1	9	9	11	466	52.1321	5.51611
	A2	Sequence	# PSMs	# Proteins	# Protein Groups	Protein Group Accessions	Modifications	ΔCn	IonScore	Exp Value	Charge	MH+ [Da]	ΔM [ppm]	RT [min]	# Missed Cleavages
	High	EAGEQGDIEPR	1	1	1	Q13283		0	76.08	7.64472e-08	2	1200.54	-4.53339	12.4757	0
	High	PADAVYGQK	1	1	1	Q13283		0	51.67	7.31827e-05	2	948.477	-1.47804	11.0127	0
	High	DFFQSYGNVVELR	2	1	1	Q13283		0	49.44	7.67898e-05	2	1573.77	5.03074	99.469	0
	High	LPNFGFVVFDDSEPVQK	1	1	1	Q13283		0	44.38	0.000249856	2	1937.95	-7.26867	108.245	0
	High	FYVHNDIFR	1	1	1	Q13283		0	43.55	0.000348841	2	1210.59	-4.74908	55.7922	0
	High	SSSPAPADIAQTVQEDLR	1	1	1	Q13283		0	43.15	0.000360708	2	1884.93	-2.39306	84.8295	0
	High	NSSYVHGGLDSNGKPADAVYGQK	1	1	1	Q13283		0	42.78	0.000189803	3	2364.11	-5.73407	28.9781	1
	High	VMSQNFTNcHTK	2	1	1	Q13283	C9(Carbamidomethyl)	0	37.98	0.000477663	2	1466.65	-1.92006	12.8365	0
	High	TFSWASVTSK	1	1	1	Q13283		0	37.51	0.00128629	2	1113.55	-4.38362	59.4055	0
Q8IY67	Ribonucleoprotein PTB-binding 1 OS=Homo sapiens GN=RAVER1 PE=1 SV=1 - [RAVR1_HUMAN]	258.051	13.04	1	6	6	12	606	63.8372	8.48486
	A2	Sequence	# PSMs	# Proteins	# Protein Groups	Protein Group Accessions	Modifications	ΔCn	IonScore	Exp Value	Charge	MH+ [Da]	ΔM [ppm]	RT [min]	# Missed Cleavages
	High	LPPGFNDVDALcR	2	1	1	Q8IY67	C12(Carbamidomethyl)	0	61.51	5.3327e-06	2	1473.72	2.28291	72.5769	0
	High	SGAEVEAGDAAER	1	1	1	Q8IY67		0	56.32	8.75047e-06	2	1261.56	-3.66262	11.9022	0
	High	VSFcAPGPPGR	1	1	1	Q8IY67	C4(Carbamidomethyl)	0	49.33	7.70094e-05	2	1144.56	1.24051	36.3409	0
	High	GYGFAEYMK	2	1	1	Q8IY67		0	44.64	0.000133988	2	1065.47	2.02805	60.0543	0
	High	EALGLGPPAAQLTPPPAPVGLR	5	1	1	Q8IY67		0	39.59	0.000159356	3	2122.2	-0.935322	89.5853	0
	High	SDLLGKPLGPR	1	1	1	Q8IY67		0	38.47	0.00039114	2	1152.67	0.873486	32.3382	1
P62851	40S ribosomal protein S25 OS=Homo sapiens GN=RPS25 PE=1 SV=1 - [RS25_HUMAN]	256.508	16	1	3	3	7	125	13.7337	10.1108
	A2	Sequence	# PSMs	# Proteins	# Protein Groups	Protein Group Accessions	Modifications	ΔCn	IonScore	Exp Value	Charge	MH+ [Da]	ΔM [ppm]	RT [min]	# Missed Cleavages
	High	AALQELLSK	5	1	1	P62851		0	72.76	2.72777e-07	2	972.572	-0.0370213	54.1976	0
	High	LNNLVLFDK	1	1	1	P62851		0	57.89	8.12774e-06	2	1075.61	-2.38297	64.7279	0
	High	DKLNNLVLFDK	1	1	1	P62851		0	47.48	7.59257e-05	2	1318.73	-3.49586	63.1856	1
P67809	Nuclease-sensitive element-binding protein 1 OS=Homo sapiens GN=YBX1 PE=1 SV=3 - [YBOX1_HUMAN]	256.451	29.63	1	6	6	9	324	35.9027	9.87646
	A2	Sequence	# PSMs	# Proteins	# Protein Groups	Protein Group Accessions	Modifications	ΔCn	IonScore	Exp Value	Charge	MH+ [Da]	ΔM [ppm]	RT [min]	# Missed Cleavages
	High	NEGSESAPEGQAQQR	1	1	1	P67809		0	62.41	1.17694e-06	2	1587.69	-4.56954	9.74296	0
	High	GAEAANVTGPGGVPVQGSK	1	1	1	P67809		0	60.31	7.16953e-06	2	1695.87	2.15658	25.8442	0
	High	NGYGFINR	2	1	1	P67809		0	51.62	4.92386e-05	2	940.462	-2.10094	34.3026	0
	High	SVGDGETVEFDVVEGEK	3	1	1	P67809		0	48.66	6.73915e-05	2	1795.83	3.23965	66.6102	0
	High	NYQQNYQNSESGEK	1	1	1	P67809		0	44.82	5.76817e-05	2	1688.71	-4.30284	11.9551	0
	High	EDGNEEDKENQGDETQGQQPPQR	1	1	1	P67809		0	36.83	0.000176368	3	2628.1	-2.93049	10.2544	1
Q14498	RNA-binding protein 39 OS=Homo sapiens GN=RBM39 PE=1 SV=2 - [RBM39_HUMAN]	253.957	7.55	1	3	3	6	530	59.3427	10.0962
	A2	Sequence	# PSMs	# Proteins	# Protein Groups	Protein Group Accessions	Modifications	ΔCn	IonScore	Exp Value	Charge	MH+ [Da]	ΔM [ppm]	RT [min]	# Missed Cleavages
	High	ALEQLNGFELAGR	4	1	1	Q14498		0	84.67	2.90014e-08	2	1417.74	-1.91223	73.6877	0
	High	TDASSASSFLDSDELER	1	1	1	Q14498		0	49.43	2.62257e-05	2	1829.81	0.864617	68.9675	0
	High	TGIDLGTTGR	1	1	1	Q14498		0	41.59	0.000745433	2	990.518	-3.23486	26.4328	0
Q13310	Polyadenylate-binding protein 4 OS=Homo sapiens GN=PABPC4 PE=1 SV=1 - [PABP4_HUMAN]	250.89	13.51	1	3	8	9	644	70.7381	9.26123
	A2	Sequence	# PSMs	# Proteins	# Protein Groups	Protein Group Accessions	Modifications	ΔCn	IonScore	Exp Value	Charge	MH+ [Da]	ΔM [ppm]	RT [min]	# Missed Cleavages
	High	SGVGNVFIK	1	1	1	Q13310		0	68.93	8.37995e-07	2	920.518	-2.09371	37.4153	0
	High	ALYDTFSAFGNILScK	1	2	2	P11940;Q13310	C15(Carbamidomethyl)	0	58.3	9.09652e-06	2	1806.88	3.94676	109.943	0
	High	PLYVALAQR	2	2	2	P11940;Q13310		0	56	1.09267e-05	2	1030.6	-0.960744	46.1777	0
	High	ALDTMNFDVIK	1	2	2	P11940;Q13310		0	49.21	8.87629e-05	2	1266.64	-1.81619	77.3948	0
	High	MNGMLLNDR	1	2	2	P11940;Q13310		0	47.89	0.000108099	2	1063.5	1.13431	37.0045	0
	High	GFGFVcFSSPEEATK	1	2	2	P11940;Q13310	C6(Carbamidomethyl)	0	45.46	9.38672e-05	2	1662.74	-2.30084	81.5229	0
	High	EFSPFGSITSAK	1	1	1	Q13310		0	40.53	0.000566474	2	1270.63	-2.44588	69.0121	0
	High	IIFVGR	1	1	1	Q13310		0	30.36	0.00055227	2	704.447	1.9201	35.9337	0
Q71U36	Tubulin alpha-1A chain OS=Homo sapiens GN=TUBA1A PE=1 SV=1 - [TBA1A_HUMAN]	248.949	18.85	2	3	8	11	451	50.1036	5.05908
	A2	Sequence	# PSMs	# Proteins	# Protein Groups	Protein Group Accessions	Modifications	ΔCn	IonScore	Exp Value	Charge	MH+ [Da]	ΔM [ppm]	RT [min]	# Missed Cleavages
	High	AVcMLSNTTAIAEAWAR	3	3	2	P68366;Q71U36	C3(Carbamidomethyl)	0	75.38	2.12955e-07	2	1864.91	2.78848	102.239	0
	High	DVNAAIATIK	1	2	1	Q71U36		0	58.91	1.20817e-05	2	1015.58	-3.06174	42.5019	0
	High	EDAANNYAR	1	3	2	P68366;Q71U36		0	46.95	7.26612e-05	2	1023.44	-4.08374	10.1082	0
	High	TIQFVDWcPTGFK	1	1	1	Q71U36	C8(Carbamidomethyl)	0	42.87	0.000351163	2	1598.76	-1.89993	99.118	0
	High	QLFHPEQLITGK	1	4	2	P68366;Q71U36		0	42.67	0.00030823	2	1410.77	-2.46382	61.8018	0
	High	EIIDLVLDR	2	2	1	Q71U36		0	40.2	0.000539571	2	1085.62	-2.13321	86.8642	0
	High	EDMAALEK	1	3	2	P68366;Q71U36		0	36.9	0.00100045	2	906.422	-1.5682	19.6538	0
	High	FDLMYAK	1	3	2	P68366;Q71U36		0	36.38	0.00126579	2	887.436	3.32699	52.7652	0
P26373	60S ribosomal protein L13 OS=Homo sapiens GN=RPL13 PE=1 SV=4 - [RL13_HUMAN]	248.704	15.17	1	3	3	8	211	24.2465	11.6489
	A2	Sequence	# PSMs	# Proteins	# Protein Groups	Protein Group Accessions	Modifications	ΔCn	IonScore	Exp Value	Charge	MH+ [Da]	ΔM [ppm]	RT [min]	# Missed Cleavages
	High	VATWFNQPAR	6	1	1	P26373		0	63.38	4.5231e-06	2	1189.61	1.89279	48.6695	0
	High	TIGISVDPR	1	1	1	P26373		0	50.49	7.19111e-05	2	957.534	-2.67377	36.274	0
	High	LATQLTGPVMPVR	1	1	1	P26373		0	37.13	0.000629337	2	1382.78	-3.17298	59.1254	0
P84098	60S ribosomal protein L19 OS=Homo sapiens GN=RPL19 PE=1 SV=1 - [RL19_HUMAN]	241.791	13.27	1	2	2	6	196	23.4512	11.4731
	A2	Sequence	# PSMs	# Proteins	# Protein Groups	Protein Group Accessions	Modifications	ΔCn	IonScore	Exp Value	Charge	MH+ [Da]	ΔM [ppm]	RT [min]	# Missed Cleavages
	High	LLADQAEAR	4	1	1	P84098		0	77.9	1.45963e-07	2	986.525	-1.16883	14.8881	0
	High	VWLDPNETNEIANANSR	2	1	1	P84098		0	75.22	1.96898e-07	2	1942.93	2.21511	65.9817	0
P68366	Tubulin alpha-4A chain OS=Homo sapiens GN=TUBA4A PE=1 SV=1 - [TBA4A_HUMAN]	241.473	19.2	2	2	7	10	448	49.8924	5.05908
	A2	Sequence	# PSMs	# Proteins	# Protein Groups	Protein Group Accessions	Modifications	ΔCn	IonScore	Exp Value	Charge	MH+ [Da]	ΔM [ppm]	RT [min]	# Missed Cleavages
	High	AVcMLSNTTAIAEAWAR	3	3	2	P68366;Q71U36	C3(Carbamidomethyl)	0	75.38	2.12955e-07	2	1864.91	2.78848	102.239	0
	High	SIQFVDWcPTGFK	2	2	1	P68366	C8(Carbamidomethyl)	0	52.3	3.38585e-05	2	1584.75	-1.28473	97.8006	0
	High	EDAANNYAR	1	3	2	P68366;Q71U36		0	46.95	7.26612e-05	2	1023.44	-4.08374	10.1082	0
	High	QLFHPEQLITGK	1	4	2	P68366;Q71U36		0	42.67	0.00030823	2	1410.77	-2.46382	61.8018	0
	High	TIGGGDDSFTTFFcETGAGK	1	1	1	P68366	C14(Carbamidomethyl)	0	41.89	0.00015855	2	2067.91	6.26533	96.647	0
	High	EDMAALEK	1	3	2	P68366;Q71U36		0	36.9	0.00100045	2	906.422	-1.5682	19.6538	0
	High	FDLMYAK	1	3	2	P68366;Q71U36		0	36.38	0.00126579	2	887.436	3.32699	52.7652	0
P39023	60S ribosomal protein L3 OS=Homo sapiens GN=RPL3 PE=1 SV=2 - [RL3_HUMAN]	236.928	11.41	1	5	5	8	403	46.0798	10.1841
	A2	Sequence	# PSMs	# Proteins	# Protein Groups	Protein Group Accessions	Modifications	ΔCn	IonScore	Exp Value	Charge	MH+ [Da]	ΔM [ppm]	RT [min]	# Missed Cleavages
	High	NNASTDYDLSDK	3	1	1	P39023		0	64.5	4.08035e-07	2	1342.57	-3.03032	19.6591	0
	High	TVFAEHISDEcK	1	1	1	P39023	C11(Carbamidomethyl)	0	55.13	1.41175e-05	2	1435.65	0.00277117	26.2481	0
	High	VAFSVAR	2	1	1	P39023		0	49.82	0.000100062	2	749.429	-2.63788	24.3818	0
	High	SLLVQTK	1	1	1	P39023		0	40.1	0.000723156	2	788.485	-3.41083	18.1805	0
	High	IGQGYLIK	1	1	1	P39023		0	36.94	0.000788977	2	891.528	-1.88047	34.2863	0
P62424	60S ribosomal protein L7a OS=Homo sapiens GN=RPL7A PE=1 SV=2 - [RL7A_HUMAN]	231.652	29.32	1	7	7	8	266	29.977	10.6089
	A2	Sequence	# PSMs	# Proteins	# Protein Groups	Protein Group Accessions	Modifications	ΔCn	IonScore	Exp Value	Charge	MH+ [Da]	ΔM [ppm]	RT [min]	# Missed Cleavages
	High	AGVNTVTTLVENK	1	1	1	P62424		0	84.1	2.89839e-08	2	1345.73	-0.730108	49.8707	0
	High	TcTTVAFTQVNSEDK	2	1	1	P62424	C2(Carbamidomethyl)	0	56.57	7.93054e-06	2	1700.77	-3.77143	37.0723	0
	High	NFGIGQDIQPK	1	1	1	P62424		0	56.18	2.4822e-05	2	1216.63	-3.30581	45.5717	0
	High	RPPVLR	1	1	1	P62424		0	44.57	6.63367e-05	2	737.477	-2.11835	9.90629	1
	High	QTATQLLK	1	1	1	P62424		0	38.82	0.000702027	2	902.532	1.66172	19.3289	0
	High	LKVPPAINQFTQALDR	1	1	1	P62424		0	36.04	0.000423106	3	1811.02	4.11656	94.0089	1
	High	KVVNPLFEK	1	1	1	P62424		0	35.51	0.00133565	2	1073.64	2.17169	30.538	1
O76070	Gamma-synuclein OS=Homo sapiens GN=SNCG PE=1 SV=2 - [SYUG_HUMAN]	229.536	33.86	1	3	3	8	127	13.3228	4.85596
	A2	Sequence	# PSMs	# Proteins	# Protein Groups	Protein Group Accessions	Modifications	ΔCn	IonScore	Exp Value	Charge	MH+ [Da]	ΔM [ppm]	RT [min]	# Missed Cleavages
	High	ENVVQSVTSVAEK	5	1	1	O76070		0	60.14	9.63436e-06	2	1389.72	-1.03089	56.8513	0
	High	TVEEAENIAVTSGVVR	1	1	1	O76070		0	55.46	2.26135e-05	2	1673.87	-2.63153	59.3719	0
	High	EKEEVAEEAQSGGD	2	1	1	O76070		0	50.65	1.11929e-05	2	1477.62	-3.48154	11.6082	1
P05388	60S acidic ribosomal protein P0 OS=Homo sapiens GN=RPLP0 PE=1 SV=1 - [RLA0_HUMAN]	221.282	10.73	1	3	3	9	317	34.2518	5.97314
	A2	Sequence	# PSMs	# Proteins	# Protein Groups	Protein Group Accessions	Modifications	ΔCn	IonScore	Exp Value	Charge	MH+ [Da]	ΔM [ppm]	RT [min]	# Missed Cleavages
	High	GNVGFVFTK	6	1	1	P05388		0	60.35	8.90281e-06	2	968.524	4.37496	49.4829	0
	High	cFIVGADNVGSK	2	1	1	P05388	C1(Carbamidomethyl)	0	47.85	0.000131247	2	1266.61	-5.76013	39.6683	0
	High	GTIEILSDVQLIK	1	1	1	P05388		0	36.01	0.000839547	2	1428.83	-0.194071	101.538	0
P11021	78 kDa glucose-regulated protein OS=Homo sapiens GN=HSPA5 PE=1 SV=2 - [GRP78_HUMAN]	213.598	8.87	1	3	4	9	654	72.2884	5.16064
	A2	Sequence	# PSMs	# Proteins	# Protein Groups	Protein Group Accessions	Modifications	ΔCn	IonScore	Exp Value	Charge	MH+ [Da]	ΔM [ppm]	RT [min]	# Missed Cleavages
	High	IEIESFYEGEDFSETLTR	2	1	1	P11021		0	56.57	6.05805e-06	2	2164.99	-2.78973	104.672	0
	High	VEIIANDQGNR	3	5	3	P08107;P11021;P11142		0	55.61	2.33571e-05	2	1228.62	-4.67129	19.162	0
	High	ELEEIVQPIISK	3	1	1	P11021		0	44.24	0.000107361	2	1397.79	3.61818	72.322	0
	High	SQIFSTASDNQPTVTIK	1	1	1	P11021		0	37.55	0.00115144	2	1836.94	3.47417	56.3578	0
P05783	Keratin, type I cytoskeletal 18 OS=Homo sapiens GN=KRT18 PE=1 SV=2 - [K1C18_HUMAN]	207.419	15.81	1	5	6	8	430	48.0285	5.45264
	A2	Sequence	# PSMs	# Proteins	# Protein Groups	Protein Group Accessions	Modifications	ΔCn	IonScore	Exp Value	Charge	MH+ [Da]	ΔM [ppm]	RT [min]	# Missed Cleavages
	High	PVSSAASVYAGAGGSGSR	2	1	1	P05783		0	71.62	4.88943e-07	2	1580.76	-3.70433	25.5035	0
	High	AQIFANTVDNAR	1	1	1	P05783		0	56	2.42397e-05	2	1319.67	1.96856	35.7923	0
	High	AQYDELAR	1	1	1	P05783		0	48.77	0.00010951	2	965.466	-2.38649	21.8271	0
	High	QSVENDIHGLR	1	1	1	P05783		0	43.82	0.000329888	2	1267.63	-3.58486	25.7888	0
	High	LAADDFR	2	3	3	P13645;Q04695;P05783		0	42.03	0.000676743	2	807.398	-2.20163	25.0609	0
	High	QAQEYEALLNIK	1	1	1	P05783		0	39.8	0.000842938	2	1419.75	4.02629	75.3605	0
P39019	40S ribosomal protein S19 OS=Homo sapiens GN=RPS19 PE=1 SV=2 - [RS19_HUMAN]	206.028	26.21	1	4	4	7	145	16.0505	10.3159
	A2	Sequence	# PSMs	# Proteins	# Protein Groups	Protein Group Accessions	Modifications	ΔCn	IonScore	Exp Value	Charge	MH+ [Da]	ΔM [ppm]	RT [min]	# Missed Cleavages
	High	ELAPYDENWFYTR	3	1	1	P39019		0	57.53	6.97585e-06	2	1703.77	2.43942	92.0408	0
	High	ALAAFLK	1	1	1	P39019		0	52.84	1.19599e-05	2	733.462	1.59426	47.4913	0
	High	DVNQQEFVR	2	1	1	P39019		0	47.27	0.00016875	2	1134.55	-2.45763	26.5587	0
	High	VLQALEGLK	1	1	1	P39019		0	44.01	9.13541e-05	2	970.594	0.478293	51.8671	0
P18124	60S ribosomal protein L7 OS=Homo sapiens GN=RPL7 PE=1 SV=1 - [RL7_HUMAN]	204.889	15.32	1	5	5	9	248	29.2072	10.6528
	A2	Sequence	# PSMs	# Proteins	# Protein Groups	Protein Group Accessions	Modifications	ΔCn	IonScore	Exp Value	Charge	MH+ [Da]	ΔM [ppm]	RT [min]	# Missed Cleavages
	High	IALTDNALIAR	3	1	1	P18124		0	61.64	3.32462e-06	2	1170.68	-3.15524	59.4033	0
	High	ASINMLR	1	1	1	P18124		0	45.01	0.000336008	2	804.438	-2.19717	26.8818	0
	High	NFAELK	1	1	1	P18124		0	38.04	0.00147614	2	721.385	-3.75781	22.5889	0
	High	SVNELIYK	1	1	1	P18124		0	37.82	0.00122245	2	965.528	-2.14027	34.3081	0
	High	LAFVIR	3	1	1	P18124		0	36.95	0.000312847	2	718.46	-1.72016	51.7079	0
P36578	60S ribosomal protein L4 OS=Homo sapiens GN=RPL4 PE=1 SV=5 - [RL4_HUMAN]	203.97	16.86	1	6	6	7	427	47.6674	11.063
	A2	Sequence	# PSMs	# Proteins	# Protein Groups	Protein Group Accessions	Modifications	ΔCn	IonScore	Exp Value	Charge	MH+ [Da]	ΔM [ppm]	RT [min]	# Missed Cleavages
	High	PLISVYSEK	2	1	1	P36578		0	62.59	4.51662e-06	2	1035.57	-3.58675	40.7896	0
	High	SGQGAFGNMcR	1	1	1	P36578	C10(Carbamidomethyl)	0	58.08	3.26753e-06	2	1184.49	0.182958	23.396	0
	High	LDELYGTWR	1	1	1	P36578		0	55.31	2.37026e-05	2	1152.57	0.287952	61.4281	0
	High	QPYAVSELAGHQTSAESWGTGR	1	1	1	P36578		0	51.25	3.59949e-05	2	2332.09	-0.770913	58.7341	0
	High	GPcIIYNEDNGIIK	1	1	1	P36578	C3(Carbamidomethyl)	0	37.77	0.00119483	2	1605.79	-2.55241	61.4345	0
	High	EAVLLLK	1	1	1	P36578		0	28.23	0.000977042	2	785.512	-1.77585	42.3341	0
O14503	Class E basic helix-loop-helix protein 40 OS=Homo sapiens GN=BHLHE40 PE=1 SV=1 - [BHE40_HUMAN]	190.246	6.8	1	2	2	4	412	45.4812	8.104
	A2	Sequence	# PSMs	# Proteins	# Protein Groups	Protein Group Accessions	Modifications	ΔCn	IonScore	Exp Value	Charge	MH+ [Da]	ΔM [ppm]	RT [min]	# Missed Cleavages
	High	VVSELLQGGTSR	1	1	1	O14503		0	87.87	1.34727e-08	2	1245.68	0.338835	36.3441	0
	High	IIALQSGLQAGELSGR	3	1	1	O14503		0	71.26	2.88045e-07	2	1612.9	1.66485	68.9709	0
Q9Y3I0	UPF0027 protein C22orf28 OS=Homo sapiens GN=C22orf28 PE=1 SV=1 - [CV028_HUMAN]	189.271	8.91	1	4	4	5	505	55.1749	7.2251
	A2	Sequence	# PSMs	# Proteins	# Protein Groups	Protein Group Accessions	Modifications	ΔCn	IonScore	Exp Value	Charge	MH+ [Da]	ΔM [ppm]	RT [min]	# Missed Cleavages
	High	NVTDVVNTcHDAGISK	2	1	1	Q9Y3I0	C9(Carbamidomethyl)	0	74.6	1.92439e-07	2	1729.81	-1.77282	30.6303	0
	High	TNLDESDVQPVK	1	1	1	Q9Y3I0		0	67.87	1.23295e-06	2	1344.67	1.28646	25.8333	0
	High	SYNDELQFLEK	1	1	1	Q9Y3I0		0	59.53	4.95861e-06	2	1385.66	-0.798999	75.0552	0
	High	TLLVHR	1	1	1	Q9Y3I0		0	39.39	0.000270438	2	738.46	-3.09546	11.7092	0
Q14444	Caprin-1 OS=Homo sapiens GN=CAPRIN1 PE=1 SV=2 - [CAPR1_HUMAN]	186.041	10.16	1	6	6	7	709	78.318	5.24951
	A2	Sequence	# PSMs	# Proteins	# Protein Groups	Protein Group Accessions	Modifications	ΔCn	IonScore	Exp Value	Charge	MH+ [Da]	ΔM [ppm]	RT [min]	# Missed Cleavages
	High	LNQDQLDAVSK	1	1	1	Q14444		0	72.14	5.8345e-07	2	1230.63	-2.89076	26.172	0
	High	SFMALSQDIQK	2	1	1	Q14444		0	52.45	4.01041e-05	2	1267.63	-2.00795	60.4983	0
	High	QFMAETQFTSGEK	1	1	1	Q14444		0	43.62	0.000143388	2	1503.67	-2.66362	48.8171	0
	High	DGYQQNFK	1	1	1	Q14444		0	42.97	0.000179155	2	999.45	-3.30849	16.8646	0
	High	QGLNGVPILSEEELSLLDEFYK	1	1	1	Q14444		0	39.56	0.000453716	2	2493.29	5.34753	112.301	0
	High	LDDYQER	1	1	1	Q14444		0	36.84	0.000838407	2	938.418	-3.76913	11.3562	0
O15119	T-box transcription factor TBX3 OS=Homo sapiens GN=TBX3 PE=1 SV=4 - [TBX3_HUMAN]	177.658	3.1	1	2	2	4	743	79.3387	8.1626
	A2	Sequence	# PSMs	# Proteins	# Protein Groups	Protein Group Accessions	Modifications	ΔCn	IonScore	Exp Value	Charge	MH+ [Da]	ΔM [ppm]	RT [min]	# Missed Cleavages
	High	LVSGLEAKPDR	3	1	1	O15119		0	75.1	1.82327e-07	2	1184.66	-3.54871	15.6373	1
	High	EAATSELQSIQR	1	1	1	O15119		0	66.02	2.45034e-06	2	1332.67	-4.19751	33.526	0
Q7Z739	YTH domain family protein 3 OS=Homo sapiens GN=YTHDF3 PE=1 SV=1 - [YTHD3_HUMAN]	172.212	13.68	1	6	7	9	585	63.8218	9.0415
	A2	Sequence	# PSMs	# Proteins	# Protein Groups	Protein Group Accessions	Modifications	ΔCn	IonScore	Exp Value	Charge	MH+ [Da]	ΔM [ppm]	RT [min]	# Missed Cleavages
	High	LENNDNKPVTNSR	1	1	1	Q7Z739		0	47.77	9.10744e-05	2	1500.73	-5.37607	8.86902	1
	High	AITDGQAGFGNDTLSK	1	1	1	Q7Z739		0	47.72	0.00011664	2	1594.77	0.981435	42.2232	0
	High	RQEEEEAMR	1	1	1	Q7Z739		0	47.01	7.76363e-05	2	1177.52	-5.7207	9.2504	1
	High	SYSEDDIHR	1	2	2	Q9Y5A9;Q7Z739		0	44.17	0.000122504	2	1121.48	-3.42414	12.1832	0
	High	IGGDLTAAVTK	3	1	1	Q7Z739		0	43.06	0.000388034	2	1045.59	-2.9843	34.5185	0
	High	VSVQNGSIHQK	1	1	1	Q7Z739		0	37.21	0.00138779	3	1196.63	-3.2924	9.97713	0
	High	HNMNIGTWDEK	1	1	1	Q7Z739		0	34.24	0.00113011	2	1344.6	-3.65081	32.5569	0
P62750	60S ribosomal protein L23a OS=Homo sapiens GN=RPL23A PE=1 SV=1 - [RL23A_HUMAN]	171.987	14.1	1	2	2	6	156	17.6841	10.4478
	A2	Sequence	# PSMs	# Proteins	# Protein Groups	Protein Group Accessions	Modifications	ΔCn	IonScore	Exp Value	Charge	MH+ [Da]	ΔM [ppm]	RT [min]	# Missed Cleavages
	High	LAPDYDALDVANK	5	1	1	P62750		0	55.55	1.69953e-05	2	1404.7	-2.60148	54.8767	0
	High	KLYDIDVAK	1	1	1	P62750		0	45.8	0.000128883	2	1064.6	-1.26213	30.8707	1
P46783	40S ribosomal protein S10 OS=Homo sapiens GN=RPS10 PE=1 SV=1 - [RS10_HUMAN]	171.471	13.94	1	2	2	4	165	18.8859	10.1548
	A2	Sequence	# PSMs	# Proteins	# Protein Groups	Protein Group Accessions	Modifications	ΔCn	IonScore	Exp Value	Charge	MH+ [Da]	ΔM [ppm]	RT [min]	# Missed Cleavages
	High	AEAGAGSATEFQFR	3	1	1	P46783		0	94.72	1.60211e-09	2	1441.66	-4.32486	48.1266	0
	High	IAIYELLFK	1	1	1	P46783		0	43	9.52256e-05	2	1109.66	1.88702	109.373	0
Q9NP61	ADP-ribosylation factor GTPase-activating protein 3 OS=Homo sapiens GN=ARFGAP3 PE=1 SV=1 - [ARFG3_HUMAN]	165.47	9.69	1	4	4	5	516	56.893	7.35693
	A2	Sequence	# PSMs	# Proteins	# Protein Groups	Protein Group Accessions	Modifications	ΔCn	IonScore	Exp Value	Charge	MH+ [Da]	ΔM [ppm]	RT [min]	# Missed Cleavages
	High	SSSFSSWDDSSDSYWK	2	1	1	Q9NP61		0	68.84	6.53085e-08	2	1870.75	2.80621	78.1471	0
	High	QSQADYETR	1	1	1	Q9NP61		0	60.91	2.43288e-06	2	1097.48	-3.49902	10.1026	0
	High	SLASQATR	1	1	1	Q9NP61		0	42.54	0.000693696	2	833.444	-4.36143	10.2282	0
	High	LSASSSISSADLFEEPR	1	1	1	Q9NP61		0	42.52	0.000361044	2	1795.88	3.92342	74.2299	0
P63208	S-phase kinase-associated protein 1 OS=Homo sapiens GN=SKP1 PE=1 SV=2 - [SKP1_HUMAN]	165.056	22.7	2	3	3	5	163	18.6462	4.53857
	A2	Sequence	# PSMs	# Proteins	# Protein Groups	Protein Group Accessions	Modifications	ΔCn	IonScore	Exp Value	Charge	MH+ [Da]	ΔM [ppm]	RT [min]	# Missed Cleavages
	High	NDFTEEEEAQVR	2	1	1	P63208		0	69.76	2.43068e-07	2	1466.63	-3.41891	35.454	0
	High	VDQGTLFELILAANYLDIK	2	1	1	P63208		0	57.57	4.28712e-06	2	2136.17	4.88995	113.842	0
	High	TPEEIR	1	2	1	P63208		0	38.94	0.000938183	2	744.386	-3.88443	10.31	0
Q14671	Pumilio homolog 1 OS=Homo sapiens GN=PUM1 PE=1 SV=3 - [PUM1_HUMAN]	165.015	3.54	1	3	3	5	1186	126.395	6.84424
	A2	Sequence	# PSMs	# Proteins	# Protein Groups	Protein Group Accessions	Modifications	ΔCn	IonScore	Exp Value	Charge	MH+ [Da]	ΔM [ppm]	RT [min]	# Missed Cleavages
	High	SQDDAMVDYFFQR	3	1	1	Q14671		0	72.75	1.06177e-07	2	1621.7	3.25939	100.573	0
	High	GIFLGDQWR	1	1	1	Q14671		0	43.96	0.000528355	2	1091.57	4.33272	75.1103	0
	High	QHGEQLGGGGSGGGGYNNSK	1	1	1	Q14671		0	39	0.000232901	3	1860.81	-4.67198	10.0753	0
P22061	Protein-L-isoaspartate(D-aspartate) O-methyltransferase OS=Homo sapiens GN=PCMT1 PE=1 SV=3 - [PIMT_HUMAN]	155.265	9.69	1	2	2	5	227	24.6346	7.21045
	A2	Sequence	# PSMs	# Proteins	# Protein Groups	Protein Group Accessions	Modifications	ΔCn	IonScore	Exp Value	Charge	MH+ [Da]	ΔM [ppm]	RT [min]	# Missed Cleavages
	High	ELVDDSINNVR	3	1	1	P22061		0	65.5	2.22652e-06	2	1273.63	-4.67912	38.471	0
	High	KDDPTLLSSGR	2	1	1	P22061		0	47.21	0.000162542	2	1188.62	-4.2759	16.8769	1
P60709	Actin, cytoplasmic 1 OS=Homo sapiens GN=ACTB PE=1 SV=1 - [ACTB_HUMAN]	153.613	11.2	2	4	4	5	375	41.7097	5.47803
	A2	Sequence	# PSMs	# Proteins	# Protein Groups	Protein Group Accessions	Modifications	ΔCn	IonScore	Exp Value	Charge	MH+ [Da]	ΔM [ppm]	RT [min]	# Missed Cleavages
	High	AGFAGDDAPR	1	2	1	P60709		0	74.77	1.31703e-07	2	976.446	-2.5633	15.7327	0
	High	GYSFTTTAER	2	2	1	P60709		0	50.19	4.25951e-05	2	1132.52	-2.63828	28.3601	0
	High	EITALAPSTMK	1	2	1	P60709		0	46.53	0.000202321	2	1161.61	-3.98942	38.1931	0
	High	DSYVGDEAQSK	1	2	1	P60709		0	37.25	0.00053684	2	1198.52	-5.10666	12.8614	0
P05387	60S acidic ribosomal protein P2 OS=Homo sapiens GN=RPLP2 PE=1 SV=1 - [RLA2_HUMAN]	150.196	40.87	1	4	4	5	115	11.6578	4.53857
	A2	Sequence	# PSMs	# Proteins	# Protein Groups	Protein Group Accessions	Modifications	ΔCn	IonScore	Exp Value	Charge	MH+ [Da]	ΔM [ppm]	RT [min]	# Missed Cleavages
	High	NIEDVIAQGIGK	1	1	1	P05387		0	58.42	9.85577e-06	2	1256.69	3.15342	79.5145	0
	High	YVASYLLAALGGNSSPSAK	2	1	1	P05387		0	55.56	1.32036e-05	2	1868.98	2.58368	103.306	0
	High	ILDSVGIEADDDR	1	1	1	P05387		0	48.06	0.000121144	2	1417.68	-0.187524	47.1879	0
	High	ILDSVGIEADDDRLNK	1	1	1	P05387		0	48.06	0.000127397	2	1772.91	1.61419	48.9283	1
A0AV96	RNA-binding protein 47 OS=Homo sapiens GN=RBM47 PE=1 SV=1 - [RBM47_HUMAN]	149.626	13.15	1	5	5	5	593	64.0263	7.6792
	A2	Sequence	# PSMs	# Proteins	# Protein Groups	Protein Group Accessions	Modifications	ΔCn	IonScore	Exp Value	Charge	MH+ [Da]	ΔM [ppm]	RT [min]	# Missed Cleavages
	High	TAEDSTAAMSSDSAAGSSAK	1	1	1	A0AV96		0	70.08	1.42353e-07	2	1844.78	-2.77894	14.5262	0
	High	LLGVccSVDNcR	1	1	1	A0AV96	C5(Carbamidomethyl); C6(Carbamidomethyl); C11(Carbamidomethyl)	0	47.53	4.7683e-05	2	1452.63	-5.26211	39.4864	0
	High	VPEGVAGAPNEAALLALMER	1	1	1	A0AV96		0	44.77	0.000163379	2	2008.05	-0.207791	107.553	0
	High	PITPVYTVAPNVQR	1	1	1	A0AV96		0	42.94	0.000198182	2	1554.87	1.19557	52.5124	0
	High	SFGQFNPGcVER	1	1	1	A0AV96	C9(Carbamidomethyl)	0	36.78	0.000944523	2	1397.63	0.983135	52.1257	0
P84085	ADP-ribosylation factor 5 OS=Homo sapiens GN=ARF5 PE=1 SV=2 - [ARF5_HUMAN]	140.594	11.11	1	2	2	4	180	20.5166	6.78564
	A2	Sequence	# PSMs	# Proteins	# Protein Groups	Protein Group Accessions	Modifications	ΔCn	IonScore	Exp Value	Charge	MH+ [Da]	ΔM [ppm]	RT [min]	# Missed Cleavages
	High	DAVLLVFANK	3	1	1	P84085		0	74.34	2.09834e-07	2	1089.63	4.22526	80.5596	0
	High	VQESADELQK	1	1	1	P84085		0	39.9	0.000844217	2	1146.56	-2.97496	12.3215	0
A6NMY6	Putative annexin A2-like protein OS=Homo sapiens GN=ANXA2P2 PE=5 SV=2 - [AXA2L_HUMAN]	137.461	6.19	2	2	2	4	339	38.6348	6.94678
	A2	Sequence	# PSMs	# Proteins	# Protein Groups	Protein Group Accessions	Modifications	ΔCn	IonScore	Exp Value	Charge	MH+ [Da]	ΔM [ppm]	RT [min]	# Missed Cleavages
	High	TNQELQEINR	3	2	1	A6NMY6		0	60.54	8.8308e-06	2	1244.62	-0.611686	21.9698	0
	High	TPAQYDASELK	1	2	1	A6NMY6		0	47.28	0.000158073	2	1222.59	-5.11912	25.0494	0
Q9UN86	Ras GTPase-activating protein-binding protein 2 OS=Homo sapiens GN=G3BP2 PE=1 SV=2 - [G3BP2_HUMAN]	135.391	8.09	1	4	4	4	482	54.0878	5.5542
	A2	Sequence	# PSMs	# Proteins	# Protein Groups	Protein Group Accessions	Modifications	ΔCn	IonScore	Exp Value	Charge	MH+ [Da]	ΔM [ppm]	RT [min]	# Missed Cleavages
	High	VEAKPEVQSQPPR	1	1	1	Q9UN86		0	69.7	7.39348e-07	3	1464.77	-4.52723	10.8518	1
	High	APEYLHR	1	1	1	Q9UN86		0	55.42	2.05261e-05	2	885.455	-3.30988	11.7048	0
	High	TEELKPQVEEK	1	1	1	Q9UN86		0	48.81	0.000122974	2	1329.69	-2.72135	12.2702	1
	High	NLEELEEK	1	1	1	Q9UN86		0	43	0.000338301	2	1003.5	0.880409	25.9909	0
Q9BSD7	Nucleoside-triphosphatase C1orf57 OS=Homo sapiens GN=C1orf57 PE=1 SV=1 - [CA057_HUMAN]	134.596	20	1	3	3	5	190	20.7001	9.53955
	A2	Sequence	# PSMs	# Proteins	# Protein Groups	Protein Group Accessions	Modifications	ΔCn	IonScore	Exp Value	Charge	MH+ [Da]	ΔM [ppm]	RT [min]	# Missed Cleavages
	High	IGFDVVTLSGTR	1	1	1	Q9BSD7		0	66.58	1.37366e-06	2	1264.69	0.0818892	77.808	0
	High	NHLLPDIVTcVQSSR	1	1	1	Q9BSD7	C10(Carbamidomethyl)	0	50.1	6.93838e-05	3	1738.9	3.78607	69.3346	0
	High	GKPLALVEEIR	3	1	1	Q9BSD7		0	43.22	0.000104815	3	1224.73	-1.87541	53.5239	1
Q15643	Thyroid receptor-interacting protein 11 OS=Homo sapiens GN=TRIP11 PE=1 SV=2 - [TRIPB_HUMAN]	134.431	3.59	1	5	5	5	1979	227.5	5.2749
	A2	Sequence	# PSMs	# Proteins	# Protein Groups	Protein Group Accessions	Modifications	ΔCn	IonScore	Exp Value	Charge	MH+ [Da]	ΔM [ppm]	RT [min]	# Missed Cleavages
	High	AQGTDNSDQSEIcK	1	1	1	Q15643	C13(Carbamidomethyl)	0	74.31	4.44817e-08	2	1552.65	-3.68793	10.6141	0
	High	QDIQTDNSDIFQETK	1	1	1	Q15643		0	41.19	0.000334544	2	1781.82	2.26862	48.6759	0
	High	EQELNQSISEK	1	1	1	Q15643		0	40.2	0.000716244	2	1304.63	-0.499415	17.2628	0
	High	LSSLNQDNSLAEDNLK	1	1	1	Q15643		0	38.53	0.000897801	2	1760.86	-3.00072	47.7038	0
	High	DTNAPESFKDTAESR	1	1	1	Q15643		0	33.6	0.00124407	2	1667.74	-4.04447	22.6274	1
P15880	40S ribosomal protein S2 OS=Homo sapiens GN=RPS2 PE=1 SV=2 - [RS2_HUMAN]	133.668	13.31	1	4	4	6	293	31.3046	10.2427
	A2	Sequence	# PSMs	# Proteins	# Protein Groups	Protein Group Accessions	Modifications	ΔCn	IonScore	Exp Value	Charge	MH+ [Da]	ΔM [ppm]	RT [min]	# Missed Cleavages
	High	GcTATLGNFAK	2	1	1	P15880	C2(Carbamidomethyl)	0	53.2	3.54186e-05	2	1139.55	-1.80887	32.6758	0
	High	SLEEIYLFSLPIK	1	1	1	P15880		0	47.05	6.60762e-05	2	1551.87	0.195763	110.558	0
	High	ATFDAISK	2	1	1	P15880		0	37.42	0.00134945	2	852.443	-3.27802	23.1616	0
	High	LSIVPVR	1	1	1	P15880		0	28.05	0.0012534	2	783.509	-0.034089	37.2756	0
Q8N0X7	Spartin OS=Homo sapiens GN=SPG20 PE=1 SV=1 - [SPG20_HUMAN]	133.625	6.76	1	3	3	4	666	72.7878	5.90967
	A2	Sequence	# PSMs	# Proteins	# Protein Groups	Protein Group Accessions	Modifications	ΔCn	IonScore	Exp Value	Charge	MH+ [Da]	ΔM [ppm]	RT [min]	# Missed Cleavages
	High	ENQEGAANVNVR	2	1	1	Q8N0X7		0	68.91	6.16938e-07	2	1300.62	-4.4191	12.4135	0
	High	GLATSLQNDLQEVPK	1	1	1	Q8N0X7		0	39.69	0.000639024	2	1612.86	3.04124	79.7408	0
	High	VSQFLVDGVcTVANcVGK	1	1	1	Q8N0X7	C10(Carbamidomethyl); C15(Carbamidomethyl)	0	38.33	0.000785876	2	1952.96	-0.616104	95.0527	0
Q13492	Phosphatidylinositol-binding clathrin assembly protein OS=Homo sapiens GN=PICALM PE=1 SV=2 - [PICAL_HUMAN]	133.136	8.59	1	4	4	4	652	70.71	7.89893
	A2	Sequence	# PSMs	# Proteins	# Protein Groups	Protein Group Accessions	Modifications	ΔCn	IonScore	Exp Value	Charge	MH+ [Da]	ΔM [ppm]	RT [min]	# Missed Cleavages
	High	ITAAQHSVTGSAVSK	1	1	1	Q13492		0	60.09	7.05233e-06	2	1456.77	-5.23174	10.9843	0
	High	QAALEEEQAR	1	1	1	Q13492		0	59.9	7.6747e-06	2	1144.56	-2.54004	11.8016	0
	High	NDVNWSQPGEK	1	1	1	Q13492		0	50.14	3.34056e-05	2	1273.58	-2.45527	23.7102	0
	High	ATTLSNAVSSLASTGLSLTK	1	1	1	Q13492		0	39.31	0.000392685	2	1922.04	-1.66497	108.328	0
Q10471	Polypeptide N-acetylgalactosaminyltransferase 2 OS=Homo sapiens GN=GALNT2 PE=1 SV=1 - [GALT2_HUMAN]	132.763	9.11	1	4	4	6	571	64.6915	8.35303
	A2	Sequence	# PSMs	# Proteins	# Protein Groups	Protein Group Accessions	Modifications	ΔCn	IonScore	Exp Value	Charge	MH+ [Da]	ΔM [ppm]	RT [min]	# Missed Cleavages
	High	EIILVDDYSNDPEDGALLGK	2	1	1	Q10471		0	58.16	9.31815e-06	2	2176.06	-1.33248	93.6455	0
	High	HVGSNLcLDSR	1	1	1	Q10471	C7(Carbamidomethyl)	0	44.55	0.000231496	2	1257.6	-2.4138	19.9508	0
	High	NFYYAAVPSAR	1	1	1	Q10471		0	39.03	0.000862679	2	1258.62	-2.73451	52.2053	0
	High	AAEVWMDEYK	2	1	1	Q10471		0	37.58	0.000515018	2	1241.55	-0.437198	54.6699	0
P61247	40S ribosomal protein S3a OS=Homo sapiens GN=RPS3A PE=1 SV=2 - [RS3A_HUMAN]	127.709	9.85	1	3	3	5	264	29.9257	9.72998
	A2	Sequence	# PSMs	# Proteins	# Protein Groups	Protein Group Accessions	Modifications	ΔCn	IonScore	Exp Value	Charge	MH+ [Da]	ΔM [ppm]	RT [min]	# Missed Cleavages
	High	TTDGYLLR	1	1	1	P61247		0	57.22	1.08112e-05	2	938.497	3.17278	30.5314	0
	High	APAMFNIR	3	1	1	P61247		0	45	0.000341526	2	919.484	2.6202	48.9516	0
	High	TSYAQHQQVR	1	1	1	P61247		0	38.08	0.00116697	2	1217.6	-4.88035	9.15061	0
P08107	Heat shock 70 kDa protein 1A/1B OS=Homo sapiens GN=HSPA1A PE=1 SV=5 - [HSP71_HUMAN]	127.11	4.68	3	2	3	5	641	70.009	5.65576
	A2	Sequence	# PSMs	# Proteins	# Protein Groups	Protein Group Accessions	Modifications	ΔCn	IonScore	Exp Value	Charge	MH+ [Da]	ΔM [ppm]	RT [min]	# Missed Cleavages
	High	VEIIANDQGNR	3	5	3	P08107;P11021;P11142		0	55.61	2.33571e-05	2	1228.62	-4.67129	19.162	0
	High	FEELcSDLFR	1	3	1	P08107	C5(Carbamidomethyl)	0	43.79	0.000142062	2	1315.6	-2.02065	78.9089	0
	High	YKAEDEVQR	1	1	1	P08107		0	39.18	0.00103872	2	1137.55	-1.29379	10.1729	1
P46781	40S ribosomal protein S9 OS=Homo sapiens GN=RPS9 PE=1 SV=3 - [RS9_HUMAN]	125.544	7.73	1	2	2	5	194	22.5776	10.6528
	A2	Sequence	# PSMs	# Proteins	# Protein Groups	Protein Group Accessions	Modifications	ΔCn	IonScore	Exp Value	Charge	MH+ [Da]	ΔM [ppm]	RT [min]	# Missed Cleavages
	High	IEDFLER	1	1	1	P46781		0	48.93	0.000107468	2	921.469	1.28852	46.2827	0
	High	LDYILGLK	4	1	1	P46781		0	45.7	5.51765e-05	2	934.564	3.46919	71.8482	0
P0C0S5	Histone H2A.Z OS=Homo sapiens GN=H2AFZ PE=1 SV=2 - [H2AZ_HUMAN]	125.355	20.31	2	3	3	5	128	13.5446	10.5796
	A2	Sequence	# PSMs	# Proteins	# Protein Groups	Protein Group Accessions	Modifications	ΔCn	IonScore	Exp Value	Charge	MH+ [Da]	ΔM [ppm]	RT [min]	# Missed Cleavages
	High	AGLQFPVGR	3	2	1	P0C0S5		0	54	5.17539e-05	2	944.535	3.44208	48.65	0
	High	GDEELDSLIK	1	2	1	P0C0S5		0	42.42	0.000569932	2	1118.56	-2.2529	58.625	0
	High	HLQLAIR	1	2	1	P0C0S5		0	33.38	0.000780637	2	850.526	0.314247	24.3253	0
P23396	40S ribosomal protein S3 OS=Homo sapiens GN=RPS3 PE=1 SV=2 - [RS3_HUMAN]	115.709	10.29	1	3	3	4	243	26.6714	9.65674
	A2	Sequence	# PSMs	# Proteins	# Protein Groups	Protein Group Accessions	Modifications	ΔCn	IonScore	Exp Value	Charge	MH+ [Da]	ΔM [ppm]	RT [min]	# Missed Cleavages
	High	AELNEFLTR	1	1	1	P23396		0	52.78	5.48319e-05	2	1092.57	3.86989	57.9661	0
	High	LLGGLAVR	2	1	1	P23396		0	50.13	1.69839e-05	2	798.52	0.673621	42.4277	0
	High	FVADGIFK	1	1	1	P23396		0	46.32	0.000159842	2	896.487	-0.435086	57.8671	0
Q96IJ6	Mannose-1-phosphate guanyltransferase alpha OS=Homo sapiens GN=GMPPA PE=1 SV=1 - [GMPPA_HUMAN]	115.181	8.1	1	3	3	4	420	46.2621	7.21045
	A2	Sequence	# PSMs	# Proteins	# Protein Groups	Protein Group Accessions	Modifications	ΔCn	IonScore	Exp Value	Charge	MH+ [Da]	ΔM [ppm]	RT [min]	# Missed Cleavages
	High	VAPSAVLGPNVSIGK	2	1	1	Q96IJ6		0	50.27	1.45657e-05	2	1408.82	0.0314218	54.2141	0
	High	AVILIGGPQK	1	1	1	Q96IJ6		0	48.3	7.39554e-06	2	995.625	0.258465	37.1437	0
	High	GVTVGEGVR	1	1	1	Q96IJ6		0	41.87	0.00112147	2	873.476	-3.26342	14.5715	0
P37840	Alpha-synuclein OS=Homo sapiens GN=SNCA PE=1 SV=1 - [SYUA_HUMAN]	114.376	30	1	3	3	5	140	14.4512	4.70361
	A2	Sequence	# PSMs	# Proteins	# Protein Groups	Protein Group Accessions	Modifications	ΔCn	IonScore	Exp Value	Charge	MH+ [Da]	ΔM [ppm]	RT [min]	# Missed Cleavages
	High	EGVVHGVATVAEK	3	1	1	P37840		0	56.65	1.37333e-05	2	1295.69	-1.86814	19.4643	0
	High	EGVVAAAEK	1	1	1	P37840		0	42.58	0.0005714	2	873.464	-3.82302	10.979	0
	High	EQVTNVGGAVVTGVTAVAQK	1	1	1	P37840		0	35.44	0.00110017	2	1928.05	4.12368	73.5085	0
Q06830	Peroxiredoxin-1 OS=Homo sapiens GN=PRDX1 PE=1 SV=1 - [PRDX1_HUMAN]	113.906	18.09	1	4	4	5	199	22.0963	8.1333
	A2	Sequence	# PSMs	# Proteins	# Protein Groups	Protein Group Accessions	Modifications	ΔCn	IonScore	Exp Value	Charge	MH+ [Da]	ΔM [ppm]	RT [min]	# Missed Cleavages
	High	TIAQDYGVLK	1	1	1	Q06830		0	45.8	0.000209106	2	1107.61	1.80715	44.9201	0
	High	SVDETLR	1	1	1	Q06830		0	43.98	0.000611915	2	819.417	-3.95924	12.7377	0
	High	GLFIIDDK	2	1	1	Q06830		0	42.64	0.000288586	2	920.508	-0.370284	65.5112	0
	High	QITVNDLPVGR	1	1	1	Q06830		0	41.61	0.000410693	2	1211.67	-3.59159	51.5429	0
Q99832	T-complex protein 1 subunit eta OS=Homo sapiens GN=CCT7 PE=1 SV=2 - [TCPH_HUMAN]	111.806	4.24	1	2	2	4	543	59.3289	7.6499
	A2	Sequence	# PSMs	# Proteins	# Protein Groups	Protein Group Accessions	Modifications	ΔCn	IonScore	Exp Value	Charge	MH+ [Da]	ΔM [ppm]	RT [min]	# Missed Cleavages
	High	QLcDNAGFDATNILNK	2	1	1	Q99832	C3(Carbamidomethyl)	0	56.68	1.42831e-05	2	1793.86	6.35485	71.9708	0
	High	ALEIIPR	2	1	1	Q99832		0	46.4	4.69628e-05	2	811.504	0.510927	42.4308	0
P83731	60S ribosomal protein L24 OS=Homo sapiens GN=RPL24 PE=1 SV=1 - [RL24_HUMAN]	109.912	8.28	1	1	1	2	157	17.7679	11.2534
	A2	Sequence	# PSMs	# Proteins	# Protein Groups	Protein Group Accessions	Modifications	ΔCn	IonScore	Exp Value	Charge	MH+ [Da]	ΔM [ppm]	RT [min]	# Missed Cleavages
	High	AITGASLADIMAK	2	1	1	P83731		0	78.56	1.03094e-07	2	1261.68	-1.41545	75.2984	0
Q9NW68	BSD domain-containing protein 1 OS=Homo sapiens GN=BSDC1 PE=2 SV=1 - [BSDC1_HUMAN]	108.97	6.74	1	2	2	3	430	47.1339	4.48779
	A2	Sequence	# PSMs	# Proteins	# Protein Groups	Protein Group Accessions	Modifications	ΔCn	IonScore	Exp Value	Charge	MH+ [Da]	ΔM [ppm]	RT [min]	# Missed Cleavages
	High	GLSDFLGVISDTFAPSPDK	2	1	1	Q9NW68		0	82.75	3.55693e-08	2	1966	7.52065	112.212	0
	High	VHQLEQEQAR	1	1	1	Q9NW68		0	38.76	0.00111758	3	1237.63	-1.33129	9.62884	0
Q96F45	Zinc finger protein 503 OS=Homo sapiens GN=ZNF503 PE=1 SV=1 - [ZN503_HUMAN]	101.03	5.42	1	2	2	2	646	62.5158	8.70459
	A2	Sequence	# PSMs	# Proteins	# Protein Groups	Protein Group Accessions	Modifications	ΔCn	IonScore	Exp Value	Charge	MH+ [Da]	ΔM [ppm]	RT [min]	# Missed Cleavages
	High	EPGGGGGGGGGGGGGGGGVSSEK	1	1	1	Q96F45		0	78.09	2.4062e-08	2	1687.72	-3.86252	9.16155	0
	High	VPSATcQPFTPR	1	1	1	Q96F45	C6(Carbamidomethyl)	0	46.64	0.000157159	2	1360.66	-3.11134	32.6919	0
P61254	60S ribosomal protein L26 OS=Homo sapiens GN=RPL26 PE=1 SV=1 - [RL26_HUMAN]	100.594	6.21	2	2	2	2	145	17.2475	10.5503
	A2	Sequence	# PSMs	# Proteins	# Protein Groups	Protein Group Accessions	Modifications	ΔCn	IonScore	Exp Value	Charge	MH+ [Da]	ΔM [ppm]	RT [min]	# Missed Cleavages
	High	KDDEVQVVR	1	2	1	P61254		0	75.98	2.83892e-07	2	1087.57	-1.68817	11.1366	1
	High	DDEVQVVR	1	2	1	P61254		0	52.72	4.06269e-05	2	959.476	-3.37738	17.6456	0
Q9NRY5	Protein FAM114A2 OS=Homo sapiens GN=FAM114A2 PE=1 SV=3 - [F1142_HUMAN]	99.2588	4.16	1	2	2	2	505	55.4642	4.88135
	A2	Sequence	# PSMs	# Proteins	# Protein Groups	Protein Group Accessions	Modifications	ΔCn	IonScore	Exp Value	Charge	MH+ [Da]	ΔM [ppm]	RT [min]	# Missed Cleavages
	High	TSNEVTVETDKK	1	1	1	Q9NRY5		0	77.98	1.15435e-07	2	1350.67	-4.45892	9.8819	1
	High	NATLSQVLR	1	1	1	Q9NRY5		0	48.38	0.000196761	2	1001.57	-2.58162	37.4061	0
Q8IWE2	Protein NOXP20 OS=Homo sapiens GN=FAM114A1 PE=1 SV=2 - [NXP20_HUMAN]	98.9726	4.44	1	2	2	3	563	60.7041	4.67822
	A2	Sequence	# PSMs	# Proteins	# Protein Groups	Protein Group Accessions	Modifications	ΔCn	IonScore	Exp Value	Charge	MH+ [Da]	ΔM [ppm]	RT [min]	# Missed Cleavages
	High	ELENEENQEEQGLEEK	2	1	1	Q8IWE2		0	50.26	2.02506e-05	2	1946.84	-1.31791	31.1145	0
	High	LAQQLTMER	1	1	1	Q8IWE2		0	48.36	0.000152446	2	1089.57	-4.00588	26.4346	0
Q06787	Fragile X mental retardation 1 protein OS=Homo sapiens GN=FMR1 PE=1 SV=1 - [FMR1_HUMAN]	98.3766	4.11	1	2	3	3	632	71.1309	7.41553
	A2	Sequence	# PSMs	# Proteins	# Protein Groups	Protein Group Accessions	Modifications	ΔCn	IonScore	Exp Value	Charge	MH+ [Da]	ΔM [ppm]	RT [min]	# Missed Cleavages
	High	TTDGSLQIR	1	1	1	Q06787		0	57.91	1.82034e-05	2	990.517	-4.21068	18.5335	0
	High	VGPNAPEEK	1	1	1	Q06787		0	50.24	6.19785e-05	2	940.468	-5.4451	10.2073	0
	High	GSNGAFYK	1	3	3	Q06787;P51114;P51116		0	42.31	0.000249683	2	843.398	-2.01157	12.7854	0
P04792	Heat shock protein beta-1 OS=Homo sapiens GN=HSPB1 PE=1 SV=2 - [HSPB1_HUMAN]	97.9688	13.17	1	3	3	3	205	22.7685	6.40479
	A2	Sequence	# PSMs	# Proteins	# Protein Groups	Protein Group Accessions	Modifications	ΔCn	IonScore	Exp Value	Charge	MH+ [Da]	ΔM [ppm]	RT [min]	# Missed Cleavages
	High	LFDQAFGLPR	1	1	1	P04792		0	53.41	4.35515e-05	2	1163.62	-0.992416	79.2922	0
	High	DGVVEITGK	1	1	1	P04792		0	53.09	5.17908e-05	2	917.494	0.656243	23.9077	0
	High	GPSWDPFR	1	1	1	P04792		0	41.17	0.0005576	2	961.457	4.88085	68.5073	0
Q7Z2W4	Zinc finger CCCH-type antiviral protein 1 OS=Homo sapiens GN=ZC3HAV1 PE=1 SV=3 - [ZCCHV_HUMAN]	97.4848	3.66	1	2	2	3	902	101.367	8.39697
	A2	Sequence	# PSMs	# Proteins	# Protein Groups	Protein Group Accessions	Modifications	ΔCn	IonScore	Exp Value	Charge	MH+ [Da]	ΔM [ppm]	RT [min]	# Missed Cleavages
	High	ATDLGGTSQAGTSQR	1	1	1	Q7Z2W4		0	59.69	9.29001e-06	2	1449.69	-3.68611	11.2059	0
	High	VALVNDSLSDVTSTTSSR	2	1	1	Q7Z2W4		0	52.03	4.60561e-05	2	1851.93	-0.466991	60.9477	0
P62701	40S ribosomal protein S4, X isoform OS=Homo sapiens GN=RPS4X PE=1 SV=2 - [RS4X_HUMAN]	97.1126	12.93	1	4	4	4	263	29.5791	10.1548
	A2	Sequence	# PSMs	# Proteins	# Protein Groups	Protein Group Accessions	Modifications	ΔCn	IonScore	Exp Value	Charge	MH+ [Da]	ΔM [ppm]	RT [min]	# Missed Cleavages
	High	LTGVFAPR	1	1	1	P62701		0	49.44	0.000103524	2	860.498	-0.736458	33.9667	0
	High	LSNIFVIGK	1	1	1	P62701		0	46.27	4.24886e-05	2	990.597	-1.45563	65.1661	0
	High	HPGSFDVVHVK	1	1	1	P62701		0	39.41	0.00101951	3	1221.64	1.21141	24.6075	0
	High	ITDFIK	1	1	1	P62701		0	34.12	0.00129731	2	736.422	-2.8227	29.7864	0
P62910	60S ribosomal protein L32 OS=Homo sapiens GN=RPL32 PE=1 SV=2 - [RL32_HUMAN]	96.8451	14.81	1	2	2	3	135	15.8498	11.3267
	A2	Sequence	# PSMs	# Proteins	# Protein Groups	Protein Group Accessions	Modifications	ΔCn	IonScore	Exp Value	Charge	MH+ [Da]	ΔM [ppm]	RT [min]	# Missed Cleavages
	High	SYcAEIAHNVSSK	1	1	1	P62910	C3(Carbamidomethyl)	0	54.26	2.00611e-05	2	1465.68	1.30016	25.5589	0
	High	AAQLAIR	2	1	1	P62910		0	49.99	4.2598e-05	2	742.454	-4.142	16.4768	0
P62280	40S ribosomal protein S11 OS=Homo sapiens GN=RPS11 PE=1 SV=3 - [RS11_HUMAN]	96.731	6.33	1	1	1	3	158	18.419	10.3013
	A2	Sequence	# PSMs	# Proteins	# Protein Groups	Protein Group Accessions	Modifications	ΔCn	IonScore	Exp Value	Charge	MH+ [Da]	ΔM [ppm]	RT [min]	# Missed Cleavages
	High	cPFTGNVSIR	3	1	1	P62280	C1(Carbamidomethyl)	0	53.98	3.65949e-05	2	1150.56	-2.84277	39.1604	0
P46782	40S ribosomal protein S5 OS=Homo sapiens GN=RPS5 PE=1 SV=4 - [RS5_HUMAN]	95.3	7.35	1	1	1	1	204	22.8621	9.71533
	A2	Sequence	# PSMs	# Proteins	# Protein Groups	Protein Group Accessions	Modifications	ΔCn	IonScore	Exp Value	Charge	MH+ [Da]	ΔM [ppm]	RT [min]	# Missed Cleavages
	High	TIAEcLADELINAAK	1	1	1	P46782	C5(Carbamidomethyl)	0	95.3	2.56755e-09	2	1631.84	4.63482	110.16	0
P27824	Calnexin OS=Homo sapiens GN=CANX PE=1 SV=2 - [CALX_HUMAN]	95.0335	1.69	1	1	1	2	592	67.5259	4.60205
	A2	Sequence	# PSMs	# Proteins	# Protein Groups	Protein Group Accessions	Modifications	ΔCn	IonScore	Exp Value	Charge	MH+ [Da]	ΔM [ppm]	RT [min]	# Missed Cleavages
	High	GTLSGWILSK	2	1	1	P27824		0	70.06	6.75601e-07	2	1061.6	5.31324	76.5186	0
P08708	40S ribosomal protein S17 OS=Homo sapiens GN=RPS17 PE=1 SV=2 - [RS17_HUMAN]	94.6451	15.56	1	2	2	4	135	15.5404	9.84717
	A2	Sequence	# PSMs	# Proteins	# Protein Groups	Protein Group Accessions	Modifications	ΔCn	IonScore	Exp Value	Charge	MH+ [Da]	ΔM [ppm]	RT [min]	# Missed Cleavages
	High	VcEEIAIIPSK	3	1	1	P08708	C2(Carbamidomethyl)	0	53.63	4.22673e-05	2	1258.67	0.852891	51.7536	0
	High	IAGYVTHLMK	1	1	1	P08708		0	40.53	0.000889541	2	1132.61	-4.02094	37.4458	0
P62888	60S ribosomal protein L30 OS=Homo sapiens GN=RPL30 PE=1 SV=2 - [RL30_HUMAN]	94.2562	17.39	1	2	2	3	115	12.7757	9.62744
	A2	Sequence	# PSMs	# Proteins	# Protein Groups	Protein Group Accessions	Modifications	ΔCn	IonScore	Exp Value	Charge	MH+ [Da]	ΔM [ppm]	RT [min]	# Missed Cleavages
	High	LVILANNcPALR	2	1	1	P62888	C8(Carbamidomethyl)	0	57.38	6.58116e-06	2	1353.76	-3.6422	60.2296	0
	High	SLESINSR	1	1	1	P62888		0	40.14	0.001099	2	905.465	-3.96019	14.4759	0
Q8IX12	Cell division cycle and apoptosis regulator protein 1 OS=Homo sapiens GN=CCAR1 PE=1 SV=2 - [CCAR1_HUMAN]	92.8854	1.04	1	1	1	3	1150	132.739	5.75732
	A2	Sequence	# PSMs	# Proteins	# Protein Groups	Protein Group Accessions	Modifications	ΔCn	IonScore	Exp Value	Charge	MH+ [Da]	ΔM [ppm]	RT [min]	# Missed Cleavages
	High	ScALAEDPQELR	3	1	1	Q8IX12	C2(Carbamidomethyl)	0	59.25	5.34826e-06	2	1388.64	-4.05576	36.4413	0
P46776	60S ribosomal protein L27a OS=Homo sapiens GN=RPL27A PE=1 SV=2 - [RL27A_HUMAN]	92.6223	14.19	1	2	2	3	148	16.551	11.0044
	A2	Sequence	# PSMs	# Proteins	# Protein Groups	Protein Group Accessions	Modifications	ΔCn	IonScore	Exp Value	Charge	MH+ [Da]	ΔM [ppm]	RT [min]	# Missed Cleavages
	High	TGAAPIIDVVR	2	1	1	P46776		0	57.79	5.23975e-06	2	1111.65	-1.23584	51.3528	0
	High	LWTLVSEQTR	1	1	1	P46776		0	41.16	0.000715833	2	1232.66	-2.99818	61.948	0
P30041	Peroxiredoxin-6 OS=Homo sapiens GN=PRDX6 PE=1 SV=3 - [PRDX6_HUMAN]	92.2642	24.55	1	4	4	4	224	25.0192	6.37939
	A2	Sequence	# PSMs	# Proteins	# Protein Groups	Protein Group Accessions	Modifications	ΔCn	IonScore	Exp Value	Charge	MH+ [Da]	ΔM [ppm]	RT [min]	# Missed Cleavages
	High	LPFPIIDDR	1	1	1	P30041		0	48.36	0.000102117	2	1085.6	-1.89746	78.6857	0
	High	PGGLLLGDVAPNFEANTTVGR	1	1	1	P30041		0	46.55	8.74172e-05	2	2098.1	3.93714	97.4195	0
	High	DFTPVcTTELGR	1	1	1	P30041	C6(Carbamidomethyl)	0	35.47	0.00130544	2	1395.65	-3.1194	55.0375	0
	High	DINAYNcEEPTEK	1	1	1	P30041	C7(Carbamidomethyl)	0	31.75	0.00100252	2	1582.66	-4.96309	26.3239	0
P04406	Glyceraldehyde-3-phosphate dehydrogenase OS=Homo sapiens GN=GAPDH PE=1 SV=3 - [G3P_HUMAN]	92.0219	9.25	1	2	2	3	335	36.0304	8.45557
	A2	Sequence	# PSMs	# Proteins	# Protein Groups	Protein Group Accessions	Modifications	ΔCn	IonScore	Exp Value	Charge	MH+ [Da]	ΔM [ppm]	RT [min]	# Missed Cleavages
	High	VPTANVSVVDLTcR	1	1	1	P04406	C13(Carbamidomethyl)	0	53.01	3.87527e-05	2	1530.8	0.688874	60.9192	0
	High	IISNAScTTNcLAPLAK	2	1	1	P04406	C7(Carbamidomethyl); C11(Carbamidomethyl)	0	51.29	4.49527e-05	2	1833.91	-3.64017	49.9446	0
Q8NCL4	Polypeptide N-acetylgalactosaminyltransferase 6 OS=Homo sapiens GN=GALNT6 PE=2 SV=2 - [GALT6_HUMAN]	91.6307	4.5	1	2	2	2	622	71.1131	8.17725
	A2	Sequence	# PSMs	# Proteins	# Protein Groups	Protein Group Accessions	Modifications	ΔCn	IonScore	Exp Value	Charge	MH+ [Da]	ΔM [ppm]	RT [min]	# Missed Cleavages
	High	NSGSGTcLTSQDK	1	1	1	Q8NCL4	C7(Carbamidomethyl)	0	77.04	4.64588e-08	2	1354.59	-3.78907	10.3654	0
	High	NLGTNQcLDVGENNR	1	1	1	Q8NCL4	C7(Carbamidomethyl)	0	37.82	0.000636005	2	1703.77	-3.35942	32.276	0
Q9BVK6	Transmembrane emp24 domain-containing protein 9 OS=Homo sapiens GN=TMED9 PE=1 SV=2 - [TMED9_HUMAN]	90.5623	4.68	1	1	1	3	235	27.2602	8.01611
	A2	Sequence	# PSMs	# Proteins	# Protein Groups	Protein Group Accessions	Modifications	ΔCn	IonScore	Exp Value	Charge	MH+ [Da]	ΔM [ppm]	RT [min]	# Missed Cleavages
	High	QLVEQVEQIQK	3	1	1	Q9BVK6		0	50.59	5.41242e-05	2	1341.73	-3.7906	40.8356	0
P17987	T-complex protein 1 subunit alpha OS=Homo sapiens GN=TCP1 PE=1 SV=1 - [TCPA_HUMAN]	86.9684	3.6	1	2	2	3	556	60.3056	6.11279
	A2	Sequence	# PSMs	# Proteins	# Protein Groups	Protein Group Accessions	Modifications	ΔCn	IonScore	Exp Value	Charge	MH+ [Da]	ΔM [ppm]	RT [min]	# Missed Cleavages
	High	IcDDELILIK	2	1	1	P17987	C2(Carbamidomethyl)	0	48.28	0.000131505	2	1231.66	-0.48693	73.8154	0
	High	YPVNSVNILK	1	1	1	P17987		0	44.74	0.000134295	2	1146.65	-1.16258	52.6106	0
Q9Y3U8	60S ribosomal protein L36 OS=Homo sapiens GN=RPL36 PE=1 SV=3 - [RL36_HUMAN]	86.7038	19.05	1	2	2	3	105	12.2459	11.5903
	A2	Sequence	# PSMs	# Proteins	# Protein Groups	Protein Group Accessions	Modifications	ΔCn	IonScore	Exp Value	Charge	MH+ [Da]	ΔM [ppm]	RT [min]	# Missed Cleavages
	High	EELSNVLAAMR	2	1	1	Q9Y3U8		0	50.16	9.39733e-05	2	1232.63	-0.794375	80.4753	0
	High	YPMAVGLNK	1	1	1	Q9Y3U8		0	49.39	0.000111052	2	992.526	2.34966	36.6173	0
P61313	60S ribosomal protein L15 OS=Homo sapiens GN=RPL15 PE=1 SV=2 - [RL15_HUMAN]	86.1075	18.14	1	4	4	4	204	24.1311	11.6196
	A2	Sequence	# PSMs	# Proteins	# Protein Groups	Protein Group Accessions	Modifications	ΔCn	IonScore	Exp Value	Charge	MH+ [Da]	ΔM [ppm]	RT [min]	# Missed Cleavages
	High	SLQSVAEER	1	1	1	P61313		0	47.24	0.000222783	2	1018.51	-2.04364	20.9947	0
	High	VLNSYWVGEDSTYK	1	1	1	P61313		0	42.51	0.000266498	2	1660.78	-3.1144	63.2374	0
	High	YIQELWR	1	1	1	P61313		0	40.52	0.000820619	2	1007.54	4.3111	57.9707	0
	High	NTLQLHR	1	1	1	P61313		0	38.27	0.0011766	2	881.493	-2.81105	11.3302	0
P62854	40S ribosomal protein S26 OS=Homo sapiens GN=RPS26 PE=1 SV=3 - [RS26_HUMAN]	86.1056	20.87	1	2	2	2	115	13.0071	11.0044
	A2	Sequence	# PSMs	# Proteins	# Protein Groups	Protein Group Accessions	Modifications	ΔCn	IonScore	Exp Value	Charge	MH+ [Da]	ΔM [ppm]	RT [min]	# Missed Cleavages
	High	DISEASVFDAYVLPK	1	1	1	P62854		0	62.56	4.57566e-06	2	1653.84	3.0894	105.549	0
	High	NIVEAAAVR	1	1	1	P62854		0	51.09	6.22429e-05	2	942.539	2.75101	24.9944	0
Q8N6H7	ADP-ribosylation factor GTPase-activating protein 2 OS=Homo sapiens GN=ARFGAP2 PE=1 SV=1 - [ARFG2_HUMAN]	85.2993	3.45	1	1	1	2	521	56.6851	7.98682
	A2	Sequence	# PSMs	# Proteins	# Protein Groups	Protein Group Accessions	Modifications	ΔCn	IonScore	Exp Value	Charge	MH+ [Da]	ΔM [ppm]	RT [min]	# Missed Cleavages
	High	SQLDLFDDVGTFASGPPK	2	1	1	Q8N6H7		0	69.77	7.53887e-07	2	1893.93	6.14415	106.166	0
P62263	40S ribosomal protein S14 OS=Homo sapiens GN=RPS14 PE=1 SV=3 - [RS14_HUMAN]	83.3319	13.91	1	2	2	2	151	16.2625	10.0522
	A2	Sequence	# PSMs	# Proteins	# Protein Groups	Protein Group Accessions	Modifications	ΔCn	IonScore	Exp Value	Charge	MH+ [Da]	ΔM [ppm]	RT [min]	# Missed Cleavages
	High	TPGPGAQSALR	1	1	1	P62263		0	71.64	5.00406e-07	2	1054.56	-3.61576	14.584	0
	High	ELGITALHIK	1	1	1	P62263		0	35.45	0.000456163	2	1094.66	-0.301063	53.6874	0
P07814	Bifunctional aminoacyl-tRNA synthetase OS=Homo sapiens GN=EPRS PE=1 SV=5 - [SYEP_HUMAN]	82.02	1.19	1	1	1	1	1512	170.483	7.32764
	A2	Sequence	# PSMs	# Proteins	# Protein Groups	Protein Group Accessions	Modifications	ΔCn	IonScore	Exp Value	Charge	MH+ [Da]	ΔM [ppm]	RT [min]	# Missed Cleavages
	High	NQGGGLSSSGAGEGQGPK	1	1	1	P07814		0	82.02	3.01468e-08	2	1587.73	-1.20107	11.0512	0
P04632	Calpain small subunit 1 OS=Homo sapiens GN=CAPNS1 PE=1 SV=1 - [CPNS1_HUMAN]	80.4233	11.94	1	3	3	3	268	28.2977	5.19873
	A2	Sequence	# PSMs	# Proteins	# Protein Groups	Protein Group Accessions	Modifications	ΔCn	IonScore	Exp Value	Charge	MH+ [Da]	ΔM [ppm]	RT [min]	# Missed Cleavages
	High	THYSNIEANESEEVR	1	1	1	P04632		0	50.82	2.69081e-05	3	1777.79	-3.60489	22.5826	0
	High	LGFEEFK	1	1	1	P04632		0	38.92	0.00054499	2	869.438	-2.49853	53.3906	0
	High	TDGFGIDTcR	1	1	1	P04632	C9(Carbamidomethyl)	0	36.63	0.000608356	2	1141.5	2.89172	34.1207	0
O00571	ATP-dependent RNA helicase DDX3X OS=Homo sapiens GN=DDX3X PE=1 SV=3 - [DDX3X_HUMAN]	78.15	2.11	1	1	1	1	662	73.198	7.18115
	A2	Sequence	# PSMs	# Proteins	# Protein Groups	Protein Group Accessions	Modifications	ΔCn	IonScore	Exp Value	Charge	MH+ [Da]	ΔM [ppm]	RT [min]	# Missed Cleavages
	High	QSSGASSSSFSSSR	1	1	1	O00571		0	78.15	3.29184e-08	2	1361.59	-3.94492	10.478	0
O76071	Probable cytosolic iron-sulfur protein assembly protein CIAO1 OS=Homo sapiens GN=CIAO1 PE=1 SV=1 - [CIAO1_HUMAN]	77.935	8.26	1	2	2	2	339	37.8158	4.97021
	A2	Sequence	# PSMs	# Proteins	# Protein Groups	Protein Group Accessions	Modifications	ΔCn	IonScore	Exp Value	Charge	MH+ [Da]	ΔM [ppm]	RT [min]	# Missed Cleavages
	High	IWGTEGDSWIcK	1	1	1	O76071	C11(Carbamidomethyl)	0	53.62	2.216e-05	2	1451.66	1.06273	74.8803	0
	High	SVAWAPSGNLLATcSR	1	1	1	O76071	C14(Carbamidomethyl)	0	50.76	6.54779e-05	2	1689.84	1.02367	73.5142	0
P62899	60S ribosomal protein L31 OS=Homo sapiens GN=RPL31 PE=1 SV=1 - [RL31_HUMAN]	77.382	7.2	1	1	1	2	125	14.4539	10.5356
	A2	Sequence	# PSMs	# Proteins	# Protein Groups	Protein Group Accessions	Modifications	ΔCn	IonScore	Exp Value	Charge	MH+ [Da]	ΔM [ppm]	RT [min]	# Missed Cleavages
	High	SAINEVVTR	2	1	1	P62899		0	53.59	6.27844e-05	2	988.538	-4.45399	23.5951	0
P68104	Elongation factor 1-alpha 1 OS=Homo sapiens GN=EEF1A1 PE=1 SV=1 - [EF1A1_HUMAN]	76.8091	2.38	3	1	1	2	462	50.1091	9.01221
	A2	Sequence	# PSMs	# Proteins	# Protein Groups	Protein Group Accessions	Modifications	ΔCn	IonScore	Exp Value	Charge	MH+ [Da]	ΔM [ppm]	RT [min]	# Missed Cleavages
	High	IGGIGTVPVGR	2	3	1	P68104		0	53.83	1.3455e-05	2	1025.61	-4.04112	37.897	0
P26196	Probable ATP-dependent RNA helicase DDX6 OS=Homo sapiens GN=DDX6 PE=1 SV=2 - [DDX6_HUMAN]	76.2098	7.25	1	2	2	2	483	54.3823	8.66064
	A2	Sequence	# PSMs	# Proteins	# Protein Groups	Protein Group Accessions	Modifications	ΔCn	IonScore	Exp Value	Charge	MH+ [Da]	ΔM [ppm]	RT [min]	# Missed Cleavages
	High	GPVKPTGGPGGGGTQTQQQMNQLK	1	1	1	P26196		0	64.67	1.65479e-06	3	2366.19	-0.840545	23.168	1
	High	SGAYLIPLLER	1	1	1	P26196		0	34.41	0.00126785	2	1231.71	5.02525	92.8905	0
Q02543	60S ribosomal protein L18a OS=Homo sapiens GN=RPL18A PE=1 SV=2 - [RL18A_HUMAN]	75.7823	15.34	1	2	2	2	176	20.7489	10.7114
	A2	Sequence	# PSMs	# Proteins	# Protein Groups	Protein Group Accessions	Modifications	ΔCn	IonScore	Exp Value	Charge	MH+ [Da]	ΔM [ppm]	RT [min]	# Missed Cleavages
	High	SSGEIVYcGQVFEK	1	1	1	Q02543	C8(Carbamidomethyl)	0	58.23	6.3132e-06	2	1602.74	-3.59312	56.5769	0
	High	DLTTAGAVTQcYR	1	1	1	Q02543	C11(Carbamidomethyl)	0	42.61	0.000326225	2	1455.68	-3.41098	42.0896	0
P62277	40S ribosomal protein S13 OS=Homo sapiens GN=RPS13 PE=1 SV=2 - [RS13_HUMAN]	74.9689	12.58	1	2	2	2	151	17.2117	10.5356
	A2	Sequence	# PSMs	# Proteins	# Protein Groups	Protein Group Accessions	Modifications	ΔCn	IonScore	Exp Value	Charge	MH+ [Da]	ΔM [ppm]	RT [min]	# Missed Cleavages
	High	GLTPSQIGVILR	1	1	1	P62277		0	63.58	1.11825e-06	2	1253.76	-0.328256	77.357	0
	High	LILIESR	1	1	1	P62277		0	35.11	0.00137202	2	843.531	1.40144	40.5702	0
P12268	Inosine-5'-monophosphate dehydrogenase 2 OS=Homo sapiens GN=IMPDH2 PE=1 SV=2 - [IMDH2_HUMAN]	74.9637	2.33	1	1	1	2	514	55.7696	6.90283
	A2	Sequence	# PSMs	# Proteins	# Protein Groups	Protein Group Accessions	Modifications	ΔCn	IonScore	Exp Value	Charge	MH+ [Da]	ΔM [ppm]	RT [min]	# Missed Cleavages
	High	VAQGVSGAVQDK	2	1	1	P12268		0	56.95	2.17984e-05	2	1158.61	-4.33319	11.6587	0
P62917	60S ribosomal protein L8 OS=Homo sapiens GN=RPL8 PE=1 SV=2 - [RL8_HUMAN]	74.1448	7	1	2	2	2	257	28.0073	11.0337
	A2	Sequence	# PSMs	# Proteins	# Protein Groups	Protein Group Accessions	Modifications	ΔCn	IonScore	Exp Value	Charge	MH+ [Da]	ΔM [ppm]	RT [min]	# Missed Cleavages
	High	AVVGVVAGGGR	1	1	1	P62917		0	61.67	3.91442e-06	2	941.548	-4.96951	18.0349	0
	High	AVDFAER	1	1	1	P62917		0	40.07	0.00115621	2	807.396	-4.62067	18.2679	0
Q9Y224	UPF0568 protein C14orf166 OS=Homo sapiens GN=C14orf166 PE=1 SV=1 - [CN166_HUMAN]	73.86	4.1	1	1	1	1	244	28.0507	6.65381
	A2	Sequence	# PSMs	# Proteins	# Protein Groups	Protein Group Accessions	Modifications	ΔCn	IonScore	Exp Value	Charge	MH+ [Da]	ΔM [ppm]	RT [min]	# Missed Cleavages
	High	NFIVWLEDQK	1	1	1	Q9Y224		0	73.86	4.00871e-07	2	1291.67	-2.38811	105.762	0
P61353	60S ribosomal protein L27 OS=Homo sapiens GN=RPL27 PE=1 SV=2 - [RL27_HUMAN]	72.9077	5.88	1	1	1	3	136	15.7877	10.5649
	A2	Sequence	# PSMs	# Proteins	# Protein Groups	Protein Group Accessions	Modifications	ΔCn	IonScore	Exp Value	Charge	MH+ [Da]	ΔM [ppm]	RT [min]	# Missed Cleavages
	High	VVLVLAGR	3	1	1	P61353		0	40.53	0.00015047	2	826.549	-1.7727	40.9329	0
P57723	Poly(rC)-binding protein 4 OS=Homo sapiens GN=PCBP4 PE=2 SV=1 - [PCBP4_HUMAN]	72.8923	2.73	1	1	1	2	403	41.4557	8.1626
	A2	Sequence	# PSMs	# Proteins	# Protein Groups	Protein Group Accessions	Modifications	ΔCn	IonScore	Exp Value	Charge	MH+ [Da]	ΔM [ppm]	RT [min]	# Missed Cleavages
	High	ITISEGScPER	2	1	1	P57723	C8(Carbamidomethyl)	0	49.86	5.16381e-05	2	1248.58	-3.53604	22.3946	0
P62805	Histone H4 OS=Homo sapiens GN=HIST1H4A PE=1 SV=2 - [H4_HUMAN]	72.5821	21.36	1	2	2	3	103	11.3604	11.356
	A2	Sequence	# PSMs	# Proteins	# Protein Groups	Protein Group Accessions	Modifications	ΔCn	IonScore	Exp Value	Charge	MH+ [Da]	ΔM [ppm]	RT [min]	# Missed Cleavages
	High	ISGLIYEETR	1	1	1	P62805		0	43.2	0.000390084	2	1180.62	-3.28671	45.5734	0
	High	DNIQGITKPAIR	2	1	1	P62805		0	40.49	0.000326057	2	1325.75	-3.079	30.1685	1
Q16706	Alpha-mannosidase 2 OS=Homo sapiens GN=MAN2A1 PE=1 SV=2 - [MA2A1_HUMAN]	72.48	1.14	1	1	1	1	1144	131.057	7.57666
	A2	Sequence	# PSMs	# Proteins	# Protein Groups	Protein Group Accessions	Modifications	ΔCn	IonScore	Exp Value	Charge	MH+ [Da]	ΔM [ppm]	RT [min]	# Missed Cleavages
	High	LLAENNEIISNIR	1	1	1	Q16706		0	72.48	3.19189e-07	2	1498.82	-3.92001	63.2117	0
Q9BQA1	Methylosome protein 50 OS=Homo sapiens GN=WDR77 PE=1 SV=1 - [MEP50_HUMAN]	70.8808	8.48	1	2	2	2	342	36.7011	5.17334
	A2	Sequence	# PSMs	# Proteins	# Protein Groups	Protein Group Accessions	Modifications	ΔCn	IonScore	Exp Value	Charge	MH+ [Da]	ΔM [ppm]	RT [min]	# Missed Cleavages
	High	VWDLAQQVVLSSYR	1	1	1	Q9BQA1		0	54.24	2.48625e-05	2	1663.88	-2.56458	102.155	0
	High	AHAAQVTcVAASPHK	1	1	1	Q9BQA1	C8(Carbamidomethyl)	0	43.18	0.000430351	3	1547.77	-2.97819	10.0332	0
Q9Y2G8	DnaJ homolog subfamily C member 16 OS=Homo sapiens GN=DNAJC16 PE=2 SV=3 - [DJC16_HUMAN]	70.7058	0.77	2	1	1	3	782	90.5345	7.12256
	A2	Sequence	# PSMs	# Proteins	# Protein Groups	Protein Group Accessions	Modifications	ΔCn	IonScore	Exp Value	Charge	MH+ [Da]	ΔM [ppm]	RT [min]	# Missed Cleavages
	High	FIQISK	3	2	1	Q9Y2G8		0	36.66	0.00121913	2	735.439	-1.98132	48.1192	0
Q9Y383	Putative RNA-binding protein Luc7-like 2 OS=Homo sapiens GN=LUC7L2 PE=1 SV=2 - [LC7L2_HUMAN]	70.3107	3.83	1	1	1	2	392	46.4856	10.0083
	A2	Sequence	# PSMs	# Proteins	# Protein Groups	Protein Group Accessions	Modifications	ΔCn	IonScore	Exp Value	Charge	MH+ [Da]	ΔM [ppm]	RT [min]	# Missed Cleavages
	High	VEQLGAEGNVEESQK	2	1	1	Q9Y383		0	50.29	6.03337e-05	2	1616.77	-2.04388	22.0667	0
P18077	60S ribosomal protein L35a OS=Homo sapiens GN=RPL35A PE=1 SV=2 - [RL35A_HUMAN]	69.272	14.55	1	2	2	2	110	12.5298	11.063
	A2	Sequence	# PSMs	# Proteins	# Protein Groups	Protein Group Accessions	Modifications	ΔCn	IonScore	Exp Value	Charge	MH+ [Da]	ΔM [ppm]	RT [min]	# Missed Cleavages
	High	AIFAGYK	1	1	1	P18077		0	52.65	2.93355e-05	2	769.422	-3.20986	30.057	0
	High	DETEFYLGK	1	1	1	P18077		0	41.29	0.000241481	2	1101.5	-5.30673	51.5515	0
P61026	Ras-related protein Rab-10 OS=Homo sapiens GN=RAB10 PE=1 SV=1 - [RAB10_HUMAN]	69.0037	11.5	6	1	2	2	200	22.5266	8.38232
	A2	Sequence	# PSMs	# Proteins	# Protein Groups	Protein Group Accessions	Modifications	ΔCn	IonScore	Exp Value	Charge	MH+ [Da]	ΔM [ppm]	RT [min]	# Missed Cleavages
	High	NIDEHANEDVER	1	1	1	P61026		0	51.64	1.95364e-05	2	1440.63	-4.31029	11.9661	0
	High	LQIWDTAGQER	1	7	2	P61026;P61006		0	41.8	0.000538465	2	1316.66	0.794958	55.8881	0
P25398	40S ribosomal protein S12 OS=Homo sapiens GN=RPS12 PE=1 SV=3 - [RS12_HUMAN]	68.4837	6.82	1	1	1	2	132	14.5055	7.21045
	A2	Sequence	# PSMs	# Proteins	# Protein Groups	Protein Group Accessions	Modifications	ΔCn	IonScore	Exp Value	Charge	MH+ [Da]	ΔM [ppm]	RT [min]	# Missed Cleavages
	High	LGEWVGLcK	2	1	1	P25398	C8(Carbamidomethyl)	0	51.51	7.48697e-05	2	1061.55	3.1841	57.7906	0
Q9NZB2	Constitutive coactivator of PPAR-gamma-like protein 1 OS=Homo sapiens GN=FAM120A PE=1 SV=2 - [F120A_HUMAN]	67.9923	1.52	1	1	1	2	1118	121.811	8.88037
	A2	Sequence	# PSMs	# Proteins	# Protein Groups	Protein Group Accessions	Modifications	ΔCn	IonScore	Exp Value	Charge	MH+ [Da]	ΔM [ppm]	RT [min]	# Missed Cleavages
	High	AEGSSTASSGSQLAEGK	2	1	1	Q9NZB2		0	50.5	3.74325e-05	2	1566.72	-4.81191	12.2182	0
P62266	40S ribosomal protein S23 OS=Homo sapiens GN=RPS23 PE=1 SV=3 - [RS23_HUMAN]	67.13	7.69	1	1	1	1	143	15.7977	10.4917
	A2	Sequence	# PSMs	# Proteins	# Protein Groups	Protein Group Accessions	Modifications	ΔCn	IonScore	Exp Value	Charge	MH+ [Da]	ΔM [ppm]	RT [min]	# Missed Cleavages
	High	VANVSLLALYK	1	1	1	P62266		0	67.13	2.90463e-07	2	1190.72	3.70894	78.2852	0
P51149	Ras-related protein Rab-7a OS=Homo sapiens GN=RAB7A PE=1 SV=1 - [RAB7A_HUMAN]	66.7637	11.59	1	2	2	2	207	23.4748	6.69775
	A2	Sequence	# PSMs	# Proteins	# Protein Groups	Protein Group Accessions	Modifications	ΔCn	IonScore	Exp Value	Charge	MH+ [Da]	ΔM [ppm]	RT [min]	# Missed Cleavages
	High	DEFLIQASPR	1	1	1	P51149		0	46.95	0.000218993	2	1175.61	-0.0467429	54.0138	0
	High	EAINVEQAFQTIAR	1	1	1	P51149		0	44.25	0.000291274	2	1589.83	0.321827	95.0728	0
P13647	Keratin, type II cytoskeletal 5 OS=Homo sapiens GN=KRT5 PE=1 SV=3 - [K2C5_HUMAN]	66.0761	3.73	1	2	2	2	590	62.34	7.73779
	A2	Sequence	# PSMs	# Proteins	# Protein Groups	Protein Group Accessions	Modifications	ΔCn	IonScore	Exp Value	Charge	MH+ [Da]	ΔM [ppm]	RT [min]	# Missed Cleavages
	High	YEELQQTAGR	1	1	1	P13647		0	49.05	0.00011014	2	1194.57	-4.99257	16.8467	0
	High	NLDLDSIIAEVK	1	2	1	P13647		0	43.4	0.000351958	2	1329.73	0.0229502	107.503	0
Q9HC07	Transmembrane protein 165 OS=Homo sapiens GN=TMEM165 PE=1 SV=1 - [TM165_HUMAN]	66.0682	7.72	1	1	1	2	324	34.8835	7.02002
	A2	Sequence	# PSMs	# Proteins	# Protein Groups	Protein Group Accessions	Modifications	ΔCn	IonScore	Exp Value	Charge	MH+ [Da]	ΔM [ppm]	RT [min]	# Missed Cleavages
	High	NKEPPAPAQQLQPQPVAVQGPEPAR	2	1	1	Q9HC07		0	48.92	4.16757e-05	3	2647.39	-2.34197	41.7441	1
Q96BM9	ADP-ribosylation factor-like protein 8A OS=Homo sapiens GN=ARL8A PE=1 SV=1 - [ARL8A_HUMAN]	65.34	4.84	2	1	1	1	186	21.402	7.76709
	A2	Sequence	# PSMs	# Proteins	# Protein Groups	Protein Group Accessions	Modifications	ΔCn	IonScore	Exp Value	Charge	MH+ [Da]	ΔM [ppm]	RT [min]	# Missed Cleavages
	High	MNLSAIQDR	1	2	1	Q96BM9		0	65.34	3.20195e-06	2	1047.52	-3.16281	36.591	0
P60866	40S ribosomal protein S20 OS=Homo sapiens GN=RPS20 PE=1 SV=1 - [RS20_HUMAN]	64.0615	5.88	1	1	1	2	119	13.3643	9.93506
	A2	Sequence	# PSMs	# Proteins	# Protein Groups	Protein Group Accessions	Modifications	ΔCn	IonScore	Exp Value	Charge	MH+ [Da]	ΔM [ppm]	RT [min]	# Missed Cleavages
	High	VcADLIR	2	1	1	P60866	C2(Carbamidomethyl)	0	53.19	5.61288e-05	2	846.447	-4.04084	24.7622	0
P13611	Versican core protein OS=Homo sapiens GN=VCAN PE=1 SV=3 - [CSPG2_HUMAN]	63.8778	0.18	1	1	1	2	3396	372.59	4.51318
	A2	Sequence	# PSMs	# Proteins	# Protein Groups	Protein Group Accessions	Modifications	ΔCn	IonScore	Exp Value	Charge	MH+ [Da]	ΔM [ppm]	RT [min]	# Missed Cleavages
	High	DGFIQR	2	1	1	P13611		0	49.24	0.000106021	2	735.378	-0.146595	21.9633	0
P42766	60S ribosomal protein L35 OS=Homo sapiens GN=RPL35 PE=1 SV=2 - [RL35_HUMAN]	62.2861	8.13	1	1	1	2	123	14.5426	11.0483
	A2	Sequence	# PSMs	# Proteins	# Protein Groups	Protein Group Accessions	Modifications	ΔCn	IonScore	Exp Value	Charge	MH+ [Da]	ΔM [ppm]	RT [min]	# Missed Cleavages
	High	VLTVINQTQK	2	1	1	P42766		0	49.31	5.45071e-05	2	1143.67	-1.90019	24.8264	0
Q6P3W7	SCY1-like protein 2 OS=Homo sapiens GN=SCYL2 PE=1 SV=1 - [SCYL2_HUMAN]	62.09	1.51	1	1	1	1	929	103.642	8.22119
	A2	Sequence	# PSMs	# Proteins	# Protein Groups	Protein Group Accessions	Modifications	ΔCn	IonScore	Exp Value	Charge	MH+ [Da]	ΔM [ppm]	RT [min]	# Missed Cleavages
	High	LGSSSLTNIPEEVR	1	1	1	Q6P3W7		0	62.09	4.69692e-06	2	1501.78	-0.838917	59.1075	0
P47914	60S ribosomal protein L29 OS=Homo sapiens GN=RPL29 PE=1 SV=2 - [RL29_HUMAN]	61.68	9.43	1	1	1	1	159	17.7411	11.6636
	A2	Sequence	# PSMs	# Proteins	# Protein Groups	Protein Group Accessions	Modifications	ΔCn	IonScore	Exp Value	Charge	MH+ [Da]	ΔM [ppm]	RT [min]	# Missed Cleavages
	High	AQAAAPASVPAQAPK	1	1	1	P47914		0	61.68	6.31659e-06	2	1377.74	-5.7508	17.5727	0
P49207	60S ribosomal protein L34 OS=Homo sapiens GN=RPL34 PE=1 SV=3 - [RL34_HUMAN]	61.6569	15.38	1	2	2	2	117	13.2845	11.4731
	A2	Sequence	# PSMs	# Proteins	# Protein Groups	Protein Group Accessions	Modifications	ΔCn	IonScore	Exp Value	Charge	MH+ [Da]	ΔM [ppm]	RT [min]	# Missed Cleavages
	High	LSYNTASNK	1	1	1	P49207		0	49.43	7.35461e-05	2	997.493	-1.71394	11.1451	0
	High	SAcGVcPGR	1	1	1	P49207	C3(Carbamidomethyl); C6(Carbamidomethyl)	0	34.62	0.000534973	2	963.41	-3.53586	9.85546	0
P29558	RNA-binding motif, single-stranded-interacting protein 1 OS=Homo sapiens GN=RBMS1 PE=1 SV=3 - [RBMS1_HUMAN]	61.32	5.17	2	2	2	2	406	44.4769	8.79248
	A2	Sequence	# PSMs	# Proteins	# Protein Groups	Protein Group Accessions	Modifications	ΔCn	IonScore	Exp Value	Charge	MH+ [Da]	ΔM [ppm]	RT [min]	# Missed Cleavages
	High	GYGFVDFDSPAAAQK	1	2	1	P29558		0	45.53	0.000197328	2	1572.74	2.31988	71.5696	0
	High	TNLYIR	1	2	1	P29558		0	43.2	0.000421194	2	779.44	-1.41554	23.6648	0
P31943	Heterogeneous nuclear ribonucleoprotein H OS=Homo sapiens GN=HNRNPH1 PE=1 SV=4 - [HNRH1_HUMAN]	60.5188	3.56	2	1	1	3	449	49.1984	6.30322
	A2	Sequence	# PSMs	# Proteins	# Protein Groups	Protein Group Accessions	Modifications	ΔCn	IonScore	Exp Value	Charge	MH+ [Da]	ΔM [ppm]	RT [min]	# Missed Cleavages
	High	HTGPNSPDTANDGFVR	3	2	1	P31943		0	36.55	0.000697125	3	1684.76	-7.37334	20.707	0
Q8NEZ5	F-box only protein 22 OS=Homo sapiens GN=FBXO22 PE=1 SV=1 - [FBX22_HUMAN]	60.05	3.47	1	1	1	1	403	44.4798	7.03467
	A2	Sequence	# PSMs	# Proteins	# Protein Groups	Protein Group Accessions	Modifications	ΔCn	IonScore	Exp Value	Charge	MH+ [Da]	ΔM [ppm]	RT [min]	# Missed Cleavages
	High	STFVLSNLAEVVER	1	1	1	Q8NEZ5		0	60.05	6.12903e-06	2	1563.84	0.965379	106.397	0
P32969	60S ribosomal protein L9 OS=Homo sapiens GN=RPL9 PE=1 SV=1 - [RL9_HUMAN]	59.87	5.21	1	1	1	1	192	21.8498	9.94971
	A2	Sequence	# PSMs	# Proteins	# Protein Groups	Protein Group Accessions	Modifications	ΔCn	IonScore	Exp Value	Charge	MH+ [Da]	ΔM [ppm]	RT [min]	# Missed Cleavages
	High	FLDGIYVSEK	1	1	1	P32969		0	59.87	7.05814e-06	2	1170.6	-2.70079	63.2035	0
Q8NCA5	Protein FAM98A OS=Homo sapiens GN=FAM98A PE=1 SV=1 - [FA98A_HUMAN]	57.84	4.62	1	1	1	1	519	55.3663	9.02686
	A2	Sequence	# PSMs	# Proteins	# Protein Groups	Protein Group Accessions	Modifications	ΔCn	IonScore	Exp Value	Charge	MH+ [Da]	ΔM [ppm]	RT [min]	# Missed Cleavages
	High	GPLLEDGALSQAVSAGASSPEFTK	1	1	1	Q8NCA5		0	57.84	7.81077e-06	3	2332.17	0.820706	90.9759	0
Q02878	60S ribosomal protein L6 OS=Homo sapiens GN=RPL6 PE=1 SV=3 - [RL6_HUMAN]	56.0499	3.82	1	1	1	2	288	32.7076	10.5796
	A2	Sequence	# PSMs	# Proteins	# Protein Groups	Protein Group Accessions	Modifications	ΔCn	IonScore	Exp Value	Charge	MH+ [Da]	ΔM [ppm]	RT [min]	# Missed Cleavages
	High	HQEGEIFDTEK	2	1	1	Q02878		0	42.95	0.000243356	2	1332.6	-3.72139	21.3535	0
Q9UMD9	Collagen alpha-1(XVII) chain OS=Homo sapiens GN=COL17A1 PE=1 SV=3 - [COHA1_HUMAN]	55.1312	0.47	1	1	1	2	1497	150.326	8.79248
	A2	Sequence	# PSMs	# Proteins	# Protein Groups	Protein Group Accessions	Modifications	ΔCn	IonScore	Exp Value	Charge	MH+ [Da]	ΔM [ppm]	RT [min]	# Missed Cleavages
	High	EGPMGPR	2	1	1	Q9UMD9		0	43.7	8.95817e-05	2	743.348	-3.16026	13.2844	0
P40616	ADP-ribosylation factor-like protein 1 OS=Homo sapiens GN=ARL1 PE=1 SV=1 - [ARL1_HUMAN]	54.71	8.84	1	1	1	1	181	20.4044	5.71924
	A2	Sequence	# PSMs	# Proteins	# Protein Groups	Protein Group Accessions	Modifications	ΔCn	IonScore	Exp Value	Charge	MH+ [Da]	ΔM [ppm]	RT [min]	# Missed Cleavages
	High	GTGLDEAMEWLVETLK	1	1	1	P40616		0	54.71	2.46787e-05	2	1791.89	6.2211	114.203	0
P61006	Ras-related protein Rab-8A OS=Homo sapiens GN=RAB8A PE=1 SV=1 - [RAB8A_HUMAN]	53.7631	12.08	6	1	2	2	207	23.6532	9.0708
	A2	Sequence	# PSMs	# Proteins	# Protein Groups	Protein Group Accessions	Modifications	ΔCn	IonScore	Exp Value	Charge	MH+ [Da]	ΔM [ppm]	RT [min]	# Missed Cleavages
	High	LQIWDTAGQER	1	7	2	P61026;P61006		0	41.8	0.000538465	2	1316.66	0.794958	55.8881	0
	High	ANINVENAFFTLAR	1	1	1	P61006		0	39	0.00104491	2	1579.82	0.00645959	106.285	0
Q96DH6	RNA-binding protein Musashi homolog 2 OS=Homo sapiens GN=MSI2 PE=1 SV=1 - [MSI2H_HUMAN]	53.7276	4.57	1	1	1	2	328	35.1741	8.48486
	A2	Sequence	# PSMs	# Proteins	# Protein Groups	Protein Group Accessions	Modifications	ΔCn	IonScore	Exp Value	Charge	MH+ [Da]	ΔM [ppm]	RT [min]	# Missed Cleavages
	High	GFGFVTFADPASVDK	2	1	1	Q96DH6		0	39.67	0.000776842	2	1557.77	6.3468	96.3898	0
P04843	Dolichyl-diphosphooligosaccharide--protein glycosyltransferase subunit 1 OS=Homo sapiens GN=RPN1 PE=1 SV=1 - [RPN1_HUMAN]	53.42	1.98	1	1	1	1	607	68.5268	6.37939
	A2	Sequence	# PSMs	# Proteins	# Protein Groups	Protein Group Accessions	Modifications	ΔCn	IonScore	Exp Value	Charge	MH+ [Da]	ΔM [ppm]	RT [min]	# Missed Cleavages
	High	GEDEEENNLEVR	1	1	1	P04843		0	53.42	5.68735e-06	2	1432.61	-3.00417	22.6209	0
P49368	T-complex protein 1 subunit gamma OS=Homo sapiens GN=CCT3 PE=1 SV=4 - [TCPG_HUMAN]	53.39	1.83	1	1	1	1	545	60.4953	6.49365
	A2	Sequence	# PSMs	# Proteins	# Protein Groups	Protein Group Accessions	Modifications	ΔCn	IonScore	Exp Value	Charge	MH+ [Da]	ΔM [ppm]	RT [min]	# Missed Cleavages
	High	EIQVQHPAAK	1	1	1	P49368		0	53.39	4.37526e-05	2	1120.61	-3.02493	10.2855	0
Q8N475	Follistatin-related protein 5 OS=Homo sapiens GN=FSTL5 PE=2 SV=2 - [FSTL5_HUMAN]	52.9529	0.71	1	1	1	2	847	95.6901	5.94775
	A2	Sequence	# PSMs	# Proteins	# Protein Groups	Protein Group Accessions	Modifications	ΔCn	IonScore	Exp Value	Charge	MH+ [Da]	ΔM [ppm]	RT [min]	# Missed Cleavages
	High	mIKSLK	2	1	1	Q8N475	M1(Oxidation)	0	37.72	0.000955099	2	735.441	-3.51332	57.1026	1
P62906	60S ribosomal protein L10a OS=Homo sapiens GN=RPL10A PE=1 SV=2 - [RL10A_HUMAN]	50.6597	9.68	1	2	2	2	217	24.8155	9.93506
	A2	Sequence	# PSMs	# Proteins	# Protein Groups	Protein Group Accessions	Modifications	ΔCn	IonScore	Exp Value	Charge	MH+ [Da]	ΔM [ppm]	RT [min]	# Missed Cleavages
	High	KYDAFLASESLIK	1	1	1	P62906		0	37.4	0.0012101	3	1484.8	2.82482	71.8139	1
	High	ILGPGLNK	1	1	1	P62906		0	35.26	0.000610596	2	811.501	-2.79843	22.9632	0
Q9NX62	Inositol monophosphatase 3 OS=Homo sapiens GN=IMPAD1 PE=1 SV=1 - [IMPA3_HUMAN]	49.7	2.79	1	1	1	1	359	38.657	6.85889
	A2	Sequence	# PSMs	# Proteins	# Protein Groups	Protein Group Accessions	Modifications	ΔCn	IonScore	Exp Value	Charge	MH+ [Da]	ΔM [ppm]	RT [min]	# Missed Cleavages
	High	MTSGDVLSNR	1	1	1	Q9NX62		0	49.7	6.96488e-05	2	1079.51	-3.14681	22.3325	0
Q13045	Protein flightless-1 homolog OS=Homo sapiens GN=FLII PE=1 SV=2 - [FLII_HUMAN]	49.49	0.87	1	1	1	1	1269	144.66	6.04932
	A2	Sequence	# PSMs	# Proteins	# Protein Groups	Protein Group Accessions	Modifications	ΔCn	IonScore	Exp Value	Charge	MH+ [Da]	ΔM [ppm]	RT [min]	# Missed Cleavages
	High	SLEGTEAQVFK	1	1	1	Q13045		0	49.49	9.6716e-05	2	1208.61	-3.7627	45.6084	0
Q9H5X1	Protein FAM96A OS=Homo sapiens GN=FAM96A PE=1 SV=1 - [FA96A_HUMAN]	49.44	5.63	1	1	1	1	160	18.3435	4.88135
	A2	Sequence	# PSMs	# Proteins	# Protein Groups	Protein Group Accessions	Modifications	ΔCn	IonScore	Exp Value	Charge	MH+ [Da]	ΔM [ppm]	RT [min]	# Missed Cleavages
	High	ALEVYDLIR	1	1	1	Q9H5X1		0	49.44	7.22393e-05	2	1091.61	-0.480861	81.4788	0
Q86W92	Liprin-beta-1 OS=Homo sapiens GN=PPFIBP1 PE=1 SV=2 - [LIPB1_HUMAN]	49	1.29	1	1	1	1	1011	113.952	5.5542
	A2	Sequence	# PSMs	# Proteins	# Protein Groups	Protein Group Accessions	Modifications	ΔCn	IonScore	Exp Value	Charge	MH+ [Da]	ΔM [ppm]	RT [min]	# Missed Cleavages
	High	DTEGLIQEINDLR	1	1	1	Q86W92		0	49	0.00010575	2	1515.77	1.40928	104.714	0
P11586	C-1-tetrahydrofolate synthase, cytoplasmic OS=Homo sapiens GN=MTHFD1 PE=1 SV=3 - [C1TC_HUMAN]	47.91	0.75	1	1	1	1	935	101.495	7.29834
	A2	Sequence	# PSMs	# Proteins	# Protein Groups	Protein Group Accessions	Modifications	ΔCn	IonScore	Exp Value	Charge	MH+ [Da]	ΔM [ppm]	RT [min]	# Missed Cleavages
	High	FSDIQIR	1	1	1	P11586		0	47.91	0.000129446	2	878.475	2.28	33.7517	0
Q15418	Ribosomal protein S6 kinase alpha-1 OS=Homo sapiens GN=RPS6KA1 PE=1 SV=2 - [KS6A1_HUMAN]	47.91	0.95	2	1	1	1	735	82.6708	7.82568
	A2	Sequence	# PSMs	# Proteins	# Protein Groups	Protein Group Accessions	Modifications	ΔCn	IonScore	Exp Value	Charge	MH+ [Da]	ΔM [ppm]	RT [min]	# Missed Cleavages
	High	GGELLDK	1	2	1	Q15418		0	47.91	0.00021925	2	731.391	-2.86757	14.7976	0
P62306	Small nuclear ribonucleoprotein F OS=Homo sapiens GN=SNRPF PE=1 SV=1 - [RUXF_HUMAN]	47.86	9.3	1	1	1	1	86	9.71878	4.66553
	A2	Sequence	# PSMs	# Proteins	# Protein Groups	Protein Group Accessions	Modifications	ΔCn	IonScore	Exp Value	Charge	MH+ [Da]	ΔM [ppm]	RT [min]	# Missed Cleavages
	High	cNNVLYIR	1	1	1	P62306	C1(Carbamidomethyl)	0	47.86	0.000139129	2	1051.53	-4.67147	37.2582	0
Q14568	Putative heat shock protein HSP 90-alpha A2 OS=Homo sapiens GN=HSP90AA2 PE=1 SV=2 - [HS902_HUMAN]	47.56	3.5	4	1	1	1	343	39.3404	4.65283
	A2	Sequence	# PSMs	# Proteins	# Protein Groups	Protein Group Accessions	Modifications	ΔCn	IonScore	Exp Value	Charge	MH+ [Da]	ΔM [ppm]	RT [min]	# Missed Cleavages
	High	ADLINNLGTIAK	1	4	1	Q14568		0	47.56	9.47095e-05	2	1242.7	-1.70491	64.8744	0
P46779	60S ribosomal protein L28 OS=Homo sapiens GN=RPL28 PE=1 SV=3 - [RL28_HUMAN]	47.44	5.11	1	1	1	1	137	15.7377	12.0151
	A2	Sequence	# PSMs	# Proteins	# Protein Groups	Protein Group Accessions	Modifications	ΔCn	IonScore	Exp Value	Charge	MH+ [Da]	ΔM [ppm]	RT [min]	# Missed Cleavages
	High	YNGLIHR	1	1	1	P46779		0	47.44	0.000147847	2	872.471	-3.4862	13.861	0
Q9NZI8	Insulin-like growth factor 2 mRNA-binding protein 1 OS=Homo sapiens GN=IGF2BP1 PE=1 SV=1 - [IF2B1_HUMAN]	47.0367	2.43	1	1	1	2	577	63.4171	9.20264
	A2	Sequence	# PSMs	# Proteins	# Protein Groups	Protein Group Accessions	Modifications	ΔCn	IonScore	Exp Value	Charge	MH+ [Da]	ΔM [ppm]	RT [min]	# Missed Cleavages
	High	LLVPTQYVGAIIGK	2	1	1	Q9NZI8		0	34.42	0.000289128	2	1471.89	-1.4847	103.53	0
P50990	T-complex protein 1 subunit theta OS=Homo sapiens GN=CCT8 PE=1 SV=4 - [TCPQ_HUMAN]	46.83	2.74	1	1	1	1	548	59.5825	5.60498
	A2	Sequence	# PSMs	# Proteins	# Protein Groups	Protein Group Accessions	Modifications	ΔCn	IonScore	Exp Value	Charge	MH+ [Da]	ΔM [ppm]	RT [min]	# Missed Cleavages
	High	AIADTGANVVVTGGK	1	1	1	P50990		0	46.83	0.000165993	2	1372.74	-1.64559	32.6693	0
Q14527	Helicase-like transcription factor OS=Homo sapiens GN=HLTF PE=1 SV=2 - [HLTF_HUMAN]	46.44	1.39	1	1	1	1	1009	113.857	8.60205
	A2	Sequence	# PSMs	# Proteins	# Protein Groups	Protein Group Accessions	Modifications	ΔCn	IonScore	Exp Value	Charge	MH+ [Da]	ΔM [ppm]	RT [min]	# Missed Cleavages
	High	NDLYYNTITNFSEK	1	1	1	Q14527		0	46.44	0.000105549	2	1721.8	-2.79865	76.4908	0
Q92734	Protein TFG OS=Homo sapiens GN=TFG PE=1 SV=2 - [TFG_HUMAN]	45.67	2.5	1	1	1	1	400	43.4212	5.09717
	A2	Sequence	# PSMs	# Proteins	# Protein Groups	Protein Group Accessions	Modifications	ΔCn	IonScore	Exp Value	Charge	MH+ [Da]	ΔM [ppm]	RT [min]	# Missed Cleavages
	High	LLSNDEVTIK	1	1	1	Q92734		0	45.67	0.000269664	2	1131.63	0.347165	36.5126	0
P55265	Double-stranded RNA-specific adenosine deaminase OS=Homo sapiens GN=ADAR PE=1 SV=3 - [DSRAD_HUMAN]	45.65	0.73	1	1	1	1	1226	135.882	8.60205
	A2	Sequence	# PSMs	# Proteins	# Protein Groups	Protein Group Accessions	Modifications	ΔCn	IonScore	Exp Value	Charge	MH+ [Da]	ΔM [ppm]	RT [min]	# Missed Cleavages
	High	QEAADAALR	1	1	1	P55265		0	45.65	0.000175614	2	944.477	-3.01553	12.2896	0
P57721	Poly(rC)-binding protein 3 OS=Homo sapiens GN=PCBP3 PE=1 SV=1 - [PCBP3_HUMAN]	45.42	3.24	3	1	1	1	339	35.9156	8.06006
	A2	Sequence	# PSMs	# Proteins	# Protein Groups	Protein Group Accessions	Modifications	ΔCn	IonScore	Exp Value	Charge	MH+ [Da]	ΔM [ppm]	RT [min]	# Missed Cleavages
	High	INISEGNcPER	1	3	1	P57721	C8(Carbamidomethyl)	0	45.42	0.00011196	2	1288.59	-3.0834	20.6512	0
P62081	40S ribosomal protein S7 OS=Homo sapiens GN=RPS7 PE=1 SV=1 - [RS7_HUMAN]	45.06	5.67	1	1	1	1	194	22.1133	10.0962
	A2	Sequence	# PSMs	# Proteins	# Protein Groups	Protein Group Accessions	Modifications	ΔCn	IonScore	Exp Value	Charge	MH+ [Da]	ΔM [ppm]	RT [min]	# Missed Cleavages
	High	DVNFEFPEFQL	1	1	1	P62081		0	45.06	0.000174658	2	1384.64	2.0234	112.977	0
P18085	ADP-ribosylation factor 4 OS=Homo sapiens GN=ARF4 PE=1 SV=3 - [ARF4_HUMAN]	44.63	3.89	1	1	1	1	180	20.4977	7.13721
	A2	Sequence	# PSMs	# Proteins	# Protein Groups	Protein Group Accessions	Modifications	ΔCn	IonScore	Exp Value	Charge	MH+ [Da]	ΔM [ppm]	RT [min]	# Missed Cleavages
	High	LGLQSLR	1	1	1	P18085		0	44.63	0.000396002	2	786.484	1.25647	37.0202	0
P37198	Nuclear pore glycoprotein p62 OS=Homo sapiens GN=NUP62 PE=1 SV=3 - [NUP62_HUMAN]	44.55	2.68	1	1	1	1	522	53.2225	5.31299
	A2	Sequence	# PSMs	# Proteins	# Protein Groups	Protein Group Accessions	Modifications	ΔCn	IonScore	Exp Value	Charge	MH+ [Da]	ΔM [ppm]	RT [min]	# Missed Cleavages
	High	ELEDLLSPLEELVK	1	1	1	P37198		0	44.55	0.000159592	2	1626.9	7.19287	111.948	0
Q5M775	Cytospin-B OS=Homo sapiens GN=CYTSB PE=1 SV=1 - [CYTSB_HUMAN]	44.36	0.66	2	1	1	1	1068	118.512	6.69775
	A2	Sequence	# PSMs	# Proteins	# Protein Groups	Protein Group Accessions	Modifications	ΔCn	IonScore	Exp Value	Charge	MH+ [Da]	ΔM [ppm]	RT [min]	# Missed Cleavages
	High	ELLAEAK	1	2	1	Q5M775		0	44.36	0.000260171	2	773.439	-2.25625	13.1213	0
O60506	Heterogeneous nuclear ribonucleoprotein Q OS=Homo sapiens GN=SYNCRIP PE=1 SV=2 - [HNRPQ_HUMAN]	44.25	2.09	1	1	1	1	623	69.5596	8.5874
	A2	Sequence	# PSMs	# Proteins	# Protein Groups	Protein Group Accessions	Modifications	ΔCn	IonScore	Exp Value	Charge	MH+ [Da]	ΔM [ppm]	RT [min]	# Missed Cleavages
	High	DLFEDELVPLFEK	1	1	1	O60506		0	44.25	0.000319462	2	1593.81	1.29187	111.456	0
O60814	Histone H2B type 1-K OS=Homo sapiens GN=HIST1H2BK PE=1 SV=3 - [H2B1K_HUMAN]	43.75	8.73	15	1	1	1	126	13.8816	10.3159
	A2	Sequence	# PSMs	# Proteins	# Protein Groups	Protein Group Accessions	Modifications	ΔCn	IonScore	Exp Value	Charge	MH+ [Da]	ΔM [ppm]	RT [min]	# Missed Cleavages
	High	QVHPDTGISSK	1	15	1	O60814		0	43.75	0.000377418	3	1168.59	-2.96342	9.93784	0
P05198	Eukaryotic translation initiation factor 2 subunit 1 OS=Homo sapiens GN=EIF2S1 PE=1 SV=3 - [IF2A_HUMAN]	43.72	3.81	1	1	1	1	315	36.0894	5.08447
	A2	Sequence	# PSMs	# Proteins	# Protein Groups	Protein Group Accessions	Modifications	ΔCn	IonScore	Exp Value	Charge	MH+ [Da]	ΔM [ppm]	RT [min]	# Missed Cleavages
	High	VVTDTDETELAR	1	1	1	P05198		0	43.72	0.00042462	2	1348.66	1.51937	25.5945	0
P61513	60S ribosomal protein L37a OS=Homo sapiens GN=RPL37A PE=1 SV=2 - [RL37A_HUMAN]	43.51	9.78	1	1	1	1	92	10.2685	10.4331
	A2	Sequence	# PSMs	# Proteins	# Protein Groups	Protein Group Accessions	Modifications	ΔCn	IonScore	Exp Value	Charge	MH+ [Da]	ΔM [ppm]	RT [min]	# Missed Cleavages
	High	KIEISQHAK	1	1	1	P61513		0	43.51	0.000251796	3	1053.6	-3.93363	9.24466	1
P35268	60S ribosomal protein L22 OS=Homo sapiens GN=RPL22 PE=1 SV=2 - [RL22_HUMAN]	43.4	8.59	1	1	1	1	128	14.7778	9.18799
	A2	Sequence	# PSMs	# Proteins	# Protein Groups	Protein Group Accessions	Modifications	ΔCn	IonScore	Exp Value	Charge	MH+ [Da]	ΔM [ppm]	RT [min]	# Missed Cleavages
	High	ITVTSEVPFSK	1	1	1	P35268		0	43.4	0.000358814	2	1207.66	1.69903	52.7607	0
P01616	Ig kappa chain V-II region MIL OS=Homo sapiens PE=1 SV=1 - [KV203_HUMAN]	43.35	11.61	5	1	1	1	112	12.0481	9.29053
	A2	Sequence	# PSMs	# Proteins	# Protein Groups	Protein Group Accessions	Modifications	ΔCn	IonScore	Exp Value	Charge	MH+ [Da]	ΔM [ppm]	RT [min]	# Missed Cleavages
	High	FSGSGSGTbFTLK	1	5	1	P01616	B9(D)	0	43.35	0.000298236	2	1303.61	-4.3294	42.1616	0
P07237	Protein disulfide-isomerase OS=Homo sapiens GN=P4HB PE=1 SV=3 - [PDIA1_HUMAN]	43.14	3.15	1	1	1	1	508	57.0807	4.86865
	A2	Sequence	# PSMs	# Proteins	# Protein Groups	Protein Group Accessions	Modifications	ΔCn	IonScore	Exp Value	Charge	MH+ [Da]	ΔM [ppm]	RT [min]	# Missed Cleavages
	High	VDATEESDLAQQYGVR	1	1	1	P07237		0	43.14	0.000334849	2	1780.85	6.79459	59.2035	0
P10809	60 kDa heat shock protein, mitochondrial OS=Homo sapiens GN=HSPD1 PE=1 SV=2 - [CH60_HUMAN]	43.09	2.09	1	1	1	1	573	61.0164	5.87158
	A2	Sequence	# PSMs	# Proteins	# Protein Groups	Protein Group Accessions	Modifications	ΔCn	IonScore	Exp Value	Charge	MH+ [Da]	ΔM [ppm]	RT [min]	# Missed Cleavages
	High	VGGTSDVEVNEK	1	1	1	P10809		0	43.09	0.000323999	2	1233.59	-2.41592	12.7603	0
Q9NR31	GTP-binding protein SAR1a OS=Homo sapiens GN=SAR1A PE=1 SV=1 - [SAR1A_HUMAN]	43.08	6.06	1	1	1	1	198	22.3525	6.68311
	A2	Sequence	# PSMs	# Proteins	# Protein Groups	Protein Group Accessions	Modifications	ΔCn	IonScore	Exp Value	Charge	MH+ [Da]	ΔM [ppm]	RT [min]	# Missed Cleavages
	High	EIFGLYGQTTGK	1	1	1	Q9NR31		0	43.08	0.000319826	2	1313.67	0.735986	60.7346	0
P12956	ATP-dependent DNA helicase 2 subunit 1 OS=Homo sapiens GN=XRCC6 PE=1 SV=2 - [KU70_HUMAN]	42.88	1.48	1	1	1	1	609	69.7991	6.63916
	A2	Sequence	# PSMs	# Proteins	# Protein Groups	Protein Group Accessions	Modifications	ΔCn	IonScore	Exp Value	Charge	MH+ [Da]	ΔM [ppm]	RT [min]	# Missed Cleavages
	High	LGSLVDEFK	1	1	1	P12956		0	42.88	0.000559023	2	1007.54	1.31067	61.5422	0
Q6NVV1	Putative 60S ribosomal protein L13a-like MGC87657 OS=Homo sapiens PE=5 SV=1 - [R13AX_HUMAN]	42.63	10.78	2	1	1	1	102	12.1269	10.7554
	A2	Sequence	# PSMs	# Proteins	# Protein Groups	Protein Group Accessions	Modifications	ΔCn	IonScore	Exp Value	Charge	MH+ [Da]	ΔM [ppm]	RT [min]	# Missed Cleavages
	High	YQAVTATLEEK	1	2	1	Q6NVV1		0	42.63	0.000431149	2	1252.64	-3.98424	33.5292	0
Q92615	La-related protein 4B OS=Homo sapiens GN=LARP4B PE=1 SV=3 - [LAR4B_HUMAN]	42.44	2.17	1	1	1	1	738	80.5026	6.91748
	A2	Sequence	# PSMs	# Proteins	# Protein Groups	Protein Group Accessions	Modifications	ΔCn	IonScore	Exp Value	Charge	MH+ [Da]	ΔM [ppm]	RT [min]	# Missed Cleavages
	High	EISESTPVEEVEALFK	1	1	1	Q92615		0	42.44	0.000441877	2	1806.91	3.22236	110.954	0
P07384	Calpain-1 catalytic subunit OS=Homo sapiens GN=CAPN1 PE=1 SV=1 - [CAN1_HUMAN]	41.98	1.4	1	1	1	1	714	81.8382	5.66846
	A2	Sequence	# PSMs	# Proteins	# Protein Groups	Protein Group Accessions	Modifications	ΔCn	IonScore	Exp Value	Charge	MH+ [Da]	ΔM [ppm]	RT [min]	# Missed Cleavages
	High	YLGQDYEQLR	1	1	1	P07384		0	41.98	0.000386661	2	1284.62	-1.55739	49.2123	0
P09211	Glutathione S-transferase P OS=Homo sapiens GN=GSTP1 PE=1 SV=2 - [GSTP1_HUMAN]	41.7	8.57	1	1	1	1	210	23.341	5.64307
	A2	Sequence	# PSMs	# Proteins	# Protein Groups	Protein Group Accessions	Modifications	ΔCn	IonScore	Exp Value	Charge	MH+ [Da]	ΔM [ppm]	RT [min]	# Missed Cleavages
	High	AFLASPEYVNLPINGNGK	1	1	1	P09211		0	41.7	0.000452976	2	1903.99	-1.95635	86.4712	0
P02795	Metallothionein-2 OS=Homo sapiens GN=MT2A PE=1 SV=1 - [MT2_HUMAN]	41.64	19.67	5	1	1	1	61	6.0372	7.82568
	A2	Sequence	# PSMs	# Proteins	# Protein Groups	Protein Group Accessions	Modifications	ΔCn	IonScore	Exp Value	Charge	MH+ [Da]	ΔM [ppm]	RT [min]	# Missed Cleavages
	High	SccSccPVGcAK	1	5	1	P02795	C2(Carbamidomethyl); C3(Carbamidomethyl); C5(Carbamidomethyl); C6(Carbamidomethyl); C10(Carbamidomethyl)	0	41.64	2.05646e-05	2	1445.51	-2.77711	10.8417	0
Q12797	Aspartyl/asparaginyl beta-hydroxylase OS=Homo sapiens GN=ASPH PE=1 SV=3 - [ASPH_HUMAN]	41.46	2.37	1	1	1	1	758	85.8095	5.0083
	A2	Sequence	# PSMs	# Proteins	# Protein Groups	Protein Group Accessions	Modifications	ΔCn	IonScore	Exp Value	Charge	MH+ [Da]	ΔM [ppm]	RT [min]	# Missed Cleavages
	High	LGIYDADGDGDFDVDDAK	1	1	1	Q12797		0	41.46	9.28845e-05	2	1900.81	-0.135854	74.8304	0
Q96F86	Enhancer of mRNA-decapping protein 3 OS=Homo sapiens GN=EDC3 PE=1 SV=1 - [EDC3_HUMAN]	41.32	2.76	1	1	1	1	508	56.0424	7.10791
	A2	Sequence	# PSMs	# Proteins	# Protein Groups	Protein Group Accessions	Modifications	ΔCn	IonScore	Exp Value	Charge	MH+ [Da]	ΔM [ppm]	RT [min]	# Missed Cleavages
	High	KPASSSSAPQNIPK	1	1	1	Q96F86		0	41.32	0.00046119	2	1411.75	-3.60003	10.2886	1
Q8TB61	Adenosine 3'-phospho 5'-phosphosulfate transporter 1 OS=Homo sapiens GN=SLC35B2 PE=1 SV=1 - [S35B2_HUMAN]	41.19	2.31	1	1	1	1	432	47.4836	9.15869
	A2	Sequence	# PSMs	# Proteins	# Protein Groups	Protein Group Accessions	Modifications	ΔCn	IonScore	Exp Value	Charge	MH+ [Da]	ΔM [ppm]	RT [min]	# Missed Cleavages
	High	ASDEVPLAPR	1	1	1	Q8TB61		0	41.19	0.000547435	2	1054.55	-2.11141	26.2988	0
P62847	40S ribosomal protein S24 OS=Homo sapiens GN=RPS24 PE=1 SV=1 - [RS24_HUMAN]	40.9	11.28	1	1	1	1	133	15.4134	10.7847
	A2	Sequence	# PSMs	# Proteins	# Protein Groups	Protein Group Accessions	Modifications	ΔCn	IonScore	Exp Value	Charge	MH+ [Da]	ΔM [ppm]	RT [min]	# Missed Cleavages
	High	TTGFGMIYDSLDYAK	1	1	1	P62847		0	40.9	0.000414544	2	1681.78	-1.07786	100.743	0
O14744	Protein arginine N-methyltransferase 5 OS=Homo sapiens GN=PRMT5 PE=1 SV=4 - [ANM5_HUMAN]	40.23	1.57	1	1	1	1	637	72.6376	6.29053
	A2	Sequence	# PSMs	# Proteins	# Protein Groups	Protein Group Accessions	Modifications	ΔCn	IonScore	Exp Value	Charge	MH+ [Da]	ΔM [ppm]	RT [min]	# Missed Cleavages
	High	VPLVAPEDLR	1	1	1	O14744		0	40.23	0.00043153	2	1108.64	1.76597	52.7781	0
Q5D1E8	Ribonuclease ZC3H12A OS=Homo sapiens GN=ZC3H12A PE=1 SV=1 - [ZC12A_HUMAN]	40	2.17	1	1	1	1	599	65.6579	6.93213
	A2	Sequence	# PSMs	# Proteins	# Protein Groups	Protein Group Accessions	Modifications	ΔCn	IonScore	Exp Value	Charge	MH+ [Da]	ΔM [ppm]	RT [min]	# Missed Cleavages
	High	QEGLTQTYAPSGR	1	1	1	Q5D1E8		0	40	0.00071	2	1407.69	0.0835882	25.9743	0
Q99805	Transmembrane 9 superfamily member 2 OS=Homo sapiens GN=TM9SF2 PE=1 SV=1 - [TM9S2_HUMAN]	39.86	1.81	1	1	1	1	663	75.7255	7.44482
	A2	Sequence	# PSMs	# Proteins	# Protein Groups	Protein Group Accessions	Modifications	ΔCn	IonScore	Exp Value	Charge	MH+ [Da]	ΔM [ppm]	RT [min]	# Missed Cleavages
	High	DAcVISSDFHER	1	1	1	Q99805	C3(Carbamidomethyl)	0	39.86	0.000263354	2	1435.63	-0.419926	33.3177	0
Q6PK04	Coiled-coil domain-containing protein 137 OS=Homo sapiens GN=CCDC137 PE=1 SV=1 - [CC137_HUMAN]	39.78	3.11	1	1	1	1	289	33.2111	10.9312
	A2	Sequence	# PSMs	# Proteins	# Protein Groups	Protein Group Accessions	Modifications	ΔCn	IonScore	Exp Value	Charge	MH+ [Da]	ΔM [ppm]	RT [min]	# Missed Cleavages
	High	QPEVQAAPK	1	1	1	Q6PK04		0	39.78	0.000752153	2	967.516	-4.51287	11.2935	0
P61019	Ras-related protein Rab-2A OS=Homo sapiens GN=RAB2A PE=1 SV=1 - [RAB2A_HUMAN]	39.74	6.6	1	1	1	1	212	23.5308	6.53662
	A2	Sequence	# PSMs	# Proteins	# Protein Groups	Protein Group Accessions	Modifications	ΔCn	IonScore	Exp Value	Charge	MH+ [Da]	ΔM [ppm]	RT [min]	# Missed Cleavages
	High	TASNVEEAFINTAK	1	1	1	P61019		0	39.74	0.000982068	2	1494.75	2.88947	60.3999	0
Q9H0U3	Magnesium transporter protein 1 OS=Homo sapiens GN=MAGT1 PE=1 SV=1 - [MAGT1_HUMAN]	39.63	2.39	1	1	1	1	335	38.0114	9.62744
	A2	Sequence	# PSMs	# Proteins	# Protein Groups	Protein Group Accessions	Modifications	ΔCn	IonScore	Exp Value	Charge	MH+ [Da]	ΔM [ppm]	RT [min]	# Missed Cleavages
	High	KEmVLSEK	1	1	1	Q9H0U3	M3(Oxidation)	0	39.63	0.000860255	2	979.507	-5.97204	26.1684	1
P62988	Ubiquitin OS=Homo sapiens GN=RPS27A PE=1 SV=1 - [UBIQ_HUMAN]	39.5	11.84	1	1	1	1	76	8.55962	7.25439
	A2	Sequence	# PSMs	# Proteins	# Protein Groups	Protein Group Accessions	Modifications	ΔCn	IonScore	Exp Value	Charge	MH+ [Da]	ΔM [ppm]	RT [min]	# Missed Cleavages
	High	TLSDYNIQK	1	1	1	P62988		0	39.5	0.000920055	2	1081.55	1.66937	25.5689	0
Q04637	Eukaryotic translation initiation factor 4 gamma 1 OS=Homo sapiens GN=EIF4G1 PE=1 SV=3 - [IF4G1_HUMAN]	39.37	0.69	1	1	1	1	1600	175.426	5.33838
	A2	Sequence	# PSMs	# Proteins	# Protein Groups	Protein Group Accessions	Modifications	ΔCn	IonScore	Exp Value	Charge	MH+ [Da]	ΔM [ppm]	RT [min]	# Missed Cleavages
	High	EAVGDLLDAFK	1	1	1	Q04637		0	39.37	0.0012775	2	1177.61	3.65494	98.6787	0
Q9Y6H1	Coiled-coil-helix-coiled-coil-helix domain-containing protein 2, mitochondrial OS=Homo sapiens GN=CHCHD2 PE=1 SV=1 - [CHCH2_HUMAN]	39.32	6.62	1	1	1	1	151	15.5027	9.21729
	A2	Sequence	# PSMs	# Proteins	# Protein Groups	Protein Group Accessions	Modifications	ΔCn	IonScore	Exp Value	Charge	MH+ [Da]	ΔM [ppm]	RT [min]	# Missed Cleavages
	High	LcEGFNEVLK	1	1	1	Q9Y6H1	C2(Carbamidomethyl)	0	39.32	0.000941447	2	1208.6	-1.89855	53.921	0
P40227	T-complex protein 1 subunit zeta OS=Homo sapiens GN=CCT6A PE=1 SV=3 - [TCPZ_HUMAN]	39.04	3.95	1	1	1	1	531	57.9876	6.68311
	A2	Sequence	# PSMs	# Proteins	# Protein Groups	Protein Group Accessions	Modifications	ΔCn	IonScore	Exp Value	Charge	MH+ [Da]	ΔM [ppm]	RT [min]	# Missed Cleavages
	High	VHAELADVLTEAVVDSILAIK	1	1	1	P40227		0	39.04	0.00016216	3	2206.23	-0.0162976	115.094	0
P62937	Peptidyl-prolyl cis-trans isomerase A OS=Homo sapiens GN=PPIA PE=1 SV=2 - [PPIA_HUMAN]	38.73	5.45	1	1	1	1	165	18.0009	7.81104
	A2	Sequence	# PSMs	# Proteins	# Protein Groups	Protein Group Accessions	Modifications	ΔCn	IonScore	Exp Value	Charge	MH+ [Da]	ΔM [ppm]	RT [min]	# Missed Cleavages
	High	FEDENFILK	1	1	1	P62937		0	38.73	0.00107844	2	1154.58	2.68846	63.6963	0
Q9Y333	U6 snRNA-associated Sm-like protein LSm2 OS=Homo sapiens GN=LSM2 PE=1 SV=1 - [LSM2_HUMAN]	38.33	20	1	1	1	1	95	10.8276	6.52197
	A2	Sequence	# PSMs	# Proteins	# Protein Groups	Protein Group Accessions	Modifications	ΔCn	IonScore	Exp Value	Charge	MH+ [Da]	ΔM [ppm]	RT [min]	# Missed Cleavages
	High	YVQLPADEVDTQLLQDAAR	1	1	1	Q9Y333		0	38.33	0.000918079	2	2145.1	5.91442	95.1883	0
Q14596	Next to BRCA1 gene 1 protein OS=Homo sapiens GN=NBR1 PE=1 SV=2 - [NBR1_HUMAN]	38.14	0.72	1	1	1	1	966	107.365	5.12256
	A2	Sequence	# PSMs	# Proteins	# Protein Groups	Protein Group Accessions	Modifications	ΔCn	IonScore	Exp Value	Charge	MH+ [Da]	ΔM [ppm]	RT [min]	# Missed Cleavages
	High	NFLKAEK	1	1	1	Q14596		0	38.14	0.00105121	2	849.48	-3.47774	37.4914	1
Q9Y6B6	GTP-binding protein SAR1b OS=Homo sapiens GN=SAR1B PE=1 SV=1 - [SAR1B_HUMAN]	38.13	11.62	1	1	1	1	198	22.3955	6.11279
	A2	Sequence	# PSMs	# Proteins	# Protein Groups	Protein Group Accessions	Modifications	ΔCn	IonScore	Exp Value	Charge	MH+ [Da]	ΔM [ppm]	RT [min]	# Missed Cleavages
	High	EELDSLMTDETIANVPILILGNK	1	1	1	Q9Y6B6		0	38.13	0.000546045	2	2528.33	6.24589	111.96	0
P42677	40S ribosomal protein S27 OS=Homo sapiens GN=RPS27 PE=1 SV=3 - [RS27_HUMAN]	36.71	9.52	2	1	1	1	84	9.45484	9.45166
	A2	Sequence	# PSMs	# Proteins	# Protein Groups	Protein Group Accessions	Modifications	ΔCn	IonScore	Exp Value	Charge	MH+ [Da]	ΔM [ppm]	RT [min]	# Missed Cleavages
	High	LTEGcSFR	1	2	1	P42677	C5(Carbamidomethyl)	0	36.71	0.00103453	2	969.443	-2.74532	17.1183	0
Q9UK39	Nocturnin OS=Homo sapiens GN=CCRN4L PE=2 SV=2 - [NOCT_HUMAN]	36.61	4.41	1	1	1	1	431	48.1652	7.2251
	A2	Sequence	# PSMs	# Proteins	# Protein Groups	Protein Group Accessions	Modifications	ΔCn	IonScore	Exp Value	Charge	MH+ [Da]	ΔM [ppm]	RT [min]	# Missed Cleavages
	High	SAQGcDLLQNLQNITQGAK	1	1	1	Q9UK39	C5(Carbamidomethyl)	0	36.61	0.00128781	2	2059.03	3.89532	98.2728	0
P55060	Exportin-2 OS=Homo sapiens GN=CSE1L PE=1 SV=3 - [XPO2_HUMAN]	34.69	1.65	1	1	1	1	971	110.346	5.77002
	A2	Sequence	# PSMs	# Proteins	# Protein Groups	Protein Group Accessions	Modifications	ΔCn	IonScore	Exp Value	Charge	MH+ [Da]	ΔM [ppm]	RT [min]	# Missed Cleavages
	High	AADEEAFEDNSEEYIR	1	1	1	P55060		0	34.69	0.000356607	2	1887.8	4.14911	58.9724	0
P82094	TATA element modulatory factor OS=Homo sapiens GN=TMF1 PE=1 SV=2 - [TMF1_HUMAN]	34.61	1.19	1	1	1	1	1093	122.767	4.91943
	A2	Sequence	# PSMs	# Proteins	# Protein Groups	Protein Group Accessions	Modifications	ΔCn	IonScore	Exp Value	Charge	MH+ [Da]	ΔM [ppm]	RT [min]	# Missed Cleavages
	High	LTESccSSDAFER	1	1	1	P82094	C5(Carbamidomethyl); C6(Carbamidomethyl)	0	34.61	0.000190267	2	1561.63	0.534835	25.994	0
P27449	V-type proton ATPase 16 kDa proteolipid subunit OS=Homo sapiens GN=ATP6V0C PE=1 SV=1 - [VATL_HUMAN]	30.2	18.71	1	1	1	1	155	15.7255	8.44092
	A2	Sequence	# PSMs	# Proteins	# Protein Groups	Protein Group Accessions	Modifications	ΔCn	IonScore	Exp Value	Charge	MH+ [Da]	ΔM [ppm]	RT [min]	# Missed Cleavages
	High	LFVGMILILIFAEVLGLYGLIVALILSTK	1	1	1	P27449		0	30.2	0.000272481	3	3132.91	0.691605	116.47	0
A6ZKI3	Protein FAM127A OS=Homo sapiens GN=FAM127A PE=1 SV=1 - [F127A_HUMAN]	28.54	10.62	1	1	1	1	113	13.1628	5.07178
	A2	Sequence	# PSMs	# Proteins	# Protein Groups	Protein Group Accessions	Modifications	ΔCn	IonScore	Exp Value	Charge	MH+ [Da]	ΔM [ppm]	RT [min]	# Missed Cleavages
	High	ALLALPIRPATR	1	1	1	A6ZKI3		0	28.54	0.000559835	3	1291.82	-1.54701	59.5596	1
