# Supplementary material for: Elevated FBXO45 promotes liver tumorigenesis through enhancing IGF2BP1 ubiquitination and subsequent PLK1 upregulation
Source: eLife journal article supplement (doi:10.7554/elife.70715), 2021-11-15
Supplement: supp [file elife-70715-supp-v1.zip › elife_poa_e70715_Figure_3_source_data_2.xls]

## Sheet: Figure 3H
Cell proliferation(%)
	HCCLM3					HepG2
	Vector	IGF2BP1	IGF2BP1 (K190A)	IGF2BP1 (K450A)		Vector	IGF2BP1	IGF2BP1 (K190A)	IGF2BP1 (K450A)
	103.909	142.513	84.4257	76.1275		100.187	153.112	120.603	128.192
	101.563	129.705	79.7354	97.7751		88.8889	142.498	108.554	115.509
	94.528	136.56	98.8575	97.2339		95.9914	152.1	106.983	119.199
						95.0864	140.237	110.576	118.926
						109.577	148.106	111.191	120.783
						110.269	148.071	123.087	132.082

## Sheet: Figure 3I
Cell proliferation(%)
	HCCLM3							HepG2
	Vector	FBXO45	Vector	FBXO45	FBXO45	FBXO45		Vector	FBXO45	Vector	FBXO45	FBXO45	FBXO45
			IGF2BP1	IGF2BP1	IGF2BP1 (K190A)	IGF2BP1 (K450A)				IGF2BP1	IGF2BP1	IGF2BP1 (K190A)	IGF2BP1 (K450A)
	99.6686	122.537	129.02	161.22	107.299	113.545		90.3397	113.525	161.905	173.392	125.055	117.834
	95.2415	136.538	124.174	170.725	103.267	142.408		100.528	140.769	160.746	165.158	112.76	135.443
	94.085	124.84	107.899	165.411	127.42	148.609		97.9671	138.041	143.235	177.78	100.418	132.419
	104.954	137.4	117.148	165.031	104.971	147.716		110.879	174.912	169.437	184.844	104.423	145.711
	101.913	139.746	133.622	196.035	122.211	128.631		100.286	153.317	146.428	178.901	107.498	147.532
	104.137	133.047	119.934	167.701	109.057	127.767
