# Supplementary material for: Elevated FBXO45 promotes liver tumorigenesis through enhancing IGF2BP1 ubiquitination and subsequent PLK1 upregulation
Source: eLife journal article supplement (doi:10.7554/elife.70715), 2021-11-15
Supplement: supp [file elife-70715-supp-v1.zip › elife_poa_e70715_Figure_4_figure_supplement_1_source_data_1.xls]

## Sheet: Figure 4-figure supplement 1B
Relative mRNA Expression PEG10
			HCCLM3							HepG2
		Time (hrs)	shVector			shIGF2BP1				Time (hrs)	shVector			shIGF2BP1
		0	0.990801	1.08423	0.93088	1.28639	0.764895	1.0163		0	0.990801	0.918064	1.09936	0.817902	0.817902	1.49485
		1	0.97716	0.93088	0.810378	0.775572	1.00231	0.897095		1	1.09177	0.816014	0.963707	0.747425	0.76313	0.920188
		2	0.799221	0.97041	0.782773	0.968171	0.634342	0.526072		2	0.756109	0.92445	0.997692	0.716978	0.716978	0.721965
		4	0.810378	0.80478	0.686184	0.390483	0.647671	0.559936		4	0.899171	0.782773	0.715323	0.550953	0.63728	0.473029
		8	0.658231	0.686184	0.827406	0.407066	0.385108	0.321599		8	0.899171	0.686184	0.658231	0.493116	0.432269	0.411796
Relative mRNA Expression ACTIN
			HCCLM3							HepG2
		Time (hrs)	shVector			shIGF2BP1				Time (hrs)	shVector			shIGF2BP1
		0	1.01866	1.01866	0.963707	1.00463	0.997692	0.997692		0	1.17555	0.948246	0.897095	0.954842	0.99539	1.05214
		1	0.950439	1.30737	0.771997	1.08423	1.31646	0.793701		1	0.897095	0.723635	1.31342	0.981686	0.831238	0.890899
		2	0.97041	0.97041	0.82169	0.609909	1.08423	1.21982		2	0.848704	0.909618	0.825496	0.974905	1.1355	0.848704
		4	0.97716	0.97716	0.782773	0.816014	0.833161	1.31646		4	0.928731	0.890899	0.866537	1.00928	0.903335	0.941696
		8	0.761368	1.33484	0.730353	0.983957	1.02574	0.874583		8	0.99539	0.814131	0.903335	1.06683	1.07425	0.903335
