# Supplementary material for: Elevated FBXO45 promotes liver tumorigenesis through enhancing IGF2BP1 ubiquitination and subsequent PLK1 upregulation
Source: eLife journal article supplement (doi:10.7554/elife.70715), 2021-11-15
Supplement: supp [file elife-70715-supp-v1.zip › elife_poa_e70715_Figure_4_source_data_1.xls]

## Sheet: Figure 4A
Cell proliferation(%)
	HCCLM3			HepG2
	siCont	siIGF2BP1		siCont	siIGF2BP1
	97.6488	61.0215		96.4008	57.2375
	103.054	60.8334		106.629	84.3944
	103.922	60.1616		95.3115	69.4743
	95.3754	63.2923		101.659	75.9807

## Sheet: Figure 4B
Colonies
	HCCLM3			HepG2
	siCont	siIGF2BP1		siCont	siIGF2BP1
	175	95		148	87
	163	114		157	108
	208	88		161	120

## Sheet: Figure 4C
mRNA expression
		HCCLM3							HepG2
		shVector			shIGF2BP1					shVector			shIGF2BP1
	IGF2BP1	1.01866	1.03288	0.950439	0.398688	0.401461	0.387786		IGF2BP1	0.986233	1.02811	0.986233	0.227405	0.21071	0.192554
	PLK1	1.01162	1.00463	0.983957	0.656712	0.652176	0.6846		PLK1	0.92445	0.943874	1.14605	0.336808	0.363493	0.384219
	MKI67	0.993092	0.907519	1.10957	0.672062	0.672062	0.631418		MKI67	1.17827	0.844791	1.00463	0.118257	0.102238	0.22688
	FOXK1	1.02101	0.965936	1.01396	1.217	1.1355	1.05946		FOXK1	1.11471	1.00463	0.89296	1.13288	1.18099	1.04972
	PDLIM7	0.97942	1.03526	0.986233	0.963707	0.750886	0.886791		PDLIM7	0.810378	0.937354	1.31646	0.812252	0.882703	0.702222

## Sheet: Figure 4E
Fold Enrichment PLK1
		HCCLM3				HepG2
		IgG	IGF2BP1			IgG	IGF2BP1
		1.08673	76.1093			1.00231	27.1585
		1.03526	76.6386			0.981686	25.1648
		0.888843	66.7178			1.0163	25.8722

## Sheet: Figure 4F
Relative mRNA Expression PLK1
		HCCLM3							HepG2
	Time (hrs)	shVector			shIGF2BP1				Time (hrs)	shVector			shIGF2BP1
	0	1.09936	0.97716	0.93088	1.02811	1.04972	0.926588		0	1.07177	0.965936	0.965936	1.06437	1.08673	0.864537
	1	0.874583	0.911722	0.95705	0.806642	0.668964	0.858565		1	0.965936	0.952638	0.913831	0.939523	0.895025	0.812252
	2	0.715323	0.838956	0.886791	0.607097	0.554785	0.550953		2	0.913831	0.835088	0.993092	0.63728	0.687771	0.697372
	4	0.735433	0.63581	0.640232	0.444421	0.406126	0.381565		4	0.532185	0.712025	0.732043	0.314253	0.323088	0.403321
	8	0.750886	0.459032	0.573024	0.175556	0.223756	0.213159		8	0.582367	0.510506	0.486327	0.167241	0.203063	0.203063

## Sheet: Figure 4G
Cell proliferation(%)
		Wild type #22						FBXO45-OE #26
	shVector	101.401	94.1926	105.892	112.843	93.5388	92.1331	147.556	161.307	151.388	150.636	135.747	139.739
	shIGF2BP1	62.7386	66.562	67.6626	60.2069	59.0431	55.4968	91.0572	84.4597	87.5517	85.4179	85.5524	85.913
		Wild type #28						FBXO45-OE #35
	shVector	102.459	113.416	101.85	96.9127	93.2656	92.0959	147.529	151.268	150.203	154.742	146.934	151.612
	shIGF2BP1	71.2827	71.7407	69.7271	67.0899	70.5311	64.7878	71.2325	76.3898	76.7206	71.6105	72.0807	72.9406

## Sheet: Figure 4H
Cell proliferation(%)
	HCCLM3
		vector						FBXO45
	siCont	79.6625	79.1361	111.174	109.391	105.461	115.176	96.6409	164.232	166.618	187.022	164.691	126.207
	siIGF2BP1	44.2128	63.0015	77.4045	71.5268	56.6588	51.1006	44.3215	49.6701	72.7009	58.0257	84.8689	52.0151
	HepG2
		vector				FBXO45
	siCont	112.146	104.551	93.1409	90.1622	127.319	134.487	124.252	125.662
	siIGF2BP1	76.2156	76.0238	86.9147	78.1196	46.4485	61.649	79.2454	109.17

## Sheet: Figure 4I
Cell proliferation(%)
		Wild type #25						FBXO45-OE #34
	DMSO	105.304	98.5084	98.4601	95.3513	98.0454	104.33	156.503	153.795	155.79	154.706	157.743	153.753
	Rigosertib	70.6179	73.1928	82.5022	75.7581	78.9279	75.7968	82.0632	77.4313	95.9065	97.951	99.4448	93.7322
	Volasertib	65.4085	69.3728	68.2488	66.6414	67.1868	69.0495	71.0755	83.3756	86.5534	89.7058	76.2894	72.2325
		Wild type #28						FBXO45-OE #35
	DMSO	101.9	102.891	96.269	99.7554	103.688	95.4957	119.259	138.652	126.477	123.038	133.672	98.1403
	Rigosertib	76.2918	79.8726	78.2677	80.2376	75.6838	74.5031	85.117	89.6484	96.2669	97.5851	100.99	104.797
	Volasertib	70.2645	75.1786	75.2181	73.5748	72.9781	73.5017	75.1063	76.2243	77.2889	72.7629	72.0874	72.5466

## Sheet: Figure 4J
Cell proliferation(%)
	HCCLM3
		vector						FBXO45
	DMSO	102.198	101.023	98.9085	96.5063	99.7871	101.577	157.8	157.83	158.613	149.645	152.734	156.494
	Rigosertib	47.8954	50.322	50.0892	48.6888	51.7531	53.2347	67.2249	64.3868	75.4158	62.7035	57.132	57.233
	Volasertib	54.2852	49.5761	46.6342	67.7085	55.8081	60.0065	84.7995	82.3355	76.1212	80.0112	84.2411	74.723
	HepG2
		vector						FBXO45
	DMSO	98.5811	87.6941	106.643	100.04	98.7577	110.215	163.088	151.058	160.82	163.037	166.958	182.838
	Rigosertib	73.6205	61.9365	70.5692	65.4223	66.4787	68.8143	103.536	101.286	97.5426	112.061	104.716	103.823
	Volasertib	52.4197	61.4906	54.6449	48.3861	56.6987	54.0113	65.9353	64.4698	69.6935	76.0156	72.3531	69.8848
