# Supplementary material for: Elevated FBXO45 promotes liver tumorigenesis through enhancing IGF2BP1 ubiquitination and subsequent PLK1 upregulation
Source: eLife journal article supplement (doi:10.7554/elife.70715), 2021-11-15
Supplement: supp [file elife-70715-supp-v1.zip › elife_poa_e70715_Figure_6_source_data_1.xls]

## Sheet: Figure 6B
Tumor volume(mm3)
	days	Vector						FBXO45						Vector+Volasertib						FBXO45+Volasertib
	2	0	0	0	0	0	0	0	0	0	0	0	0	0	0	0	0	0	0	0	0	0	0	0	0
	4	62.4068	67.4841	74.6442	75.6211	76.4035	84.3328	55.54	64.2123	71.6563	72.6363	81.8454	127.444	38.0007	57.0657	70.1957	70.7688	85.1497	85.3432	43.4804	51.941	66.2353	72.9463	96.9588	120.451
	6	131.39	119.845	98.3387	83.6766	181.849	121.12	121.847	178.697	135.489	182.464	106.658	242.14	53.5109	88.8869	20.2263	60.4757	76.5929	52.0243	162.002	51.5611	73.3617	43.126	43.5634	60.7158
	8	93.687	97.6011	162.721	215.623	97.5581	104.161	125.04	226.617	212.644	113.144	270.037	168.483	31.3777	63.9008	90.2366	80.1547	41.3376	32.5158	73.036	89.5977	40.9658	89.4793	41.3376	50.553
	10	104.571	165.317	73.3956	217.223	201.598	262.781	274.504	164.522	308.213	188.73	249.338	349.355	27.7218	33.7653	10.6029	43.4475	12.8581	22.5323	17.6976	19.8027	35.1778	53.8626	25.3963	45.9483
	12	352.485	201.862	99.6532	269.228	300.856	177.131	472.559	191.656	227.828	349.895	236.147	413.421	41.9892	40.5763	25.7359	39.4309	16.5183	33.4638	77.2332	41.8854	19.3868	26.8426	25.8839	36.4466

## Sheet: Figure 6C
Body weight（g）
	days	vector						FBXO45						Vector+Volasertib						FBXO45+Volasertib
	2	19.6	19.9	21.1	21.4	19.2	20.9	21.5	19.3	20.8	19.9	19.9	19.5	20.8	21.3	19.4	18.9	20.4	20.5	19.3	19.7	19	21.2	21.1	21.3
	4	19.9	21.4	19.8	19.5	21	21.8	22.1	19.6	20.1	20.4	20.4	20.9	20.4	20.7	19.8	20.5	21.1	22	21.3	19.7	19.3	21.6	21.3	19.4
	6	20	20.1	21.9	22.1	19.9	20	21.3	22.8	21.3	20.2	20.3	19.6	20.5	21.2	20.7	20.9	22	21.2	19.9	21.4	20.4	21.2	20	22.3
	8	20.7	20.7	20.4	22.2	21.3	21.3	19.2	21.8	20.6	22.3	20.7	21.1	21.7	20.8	21	21.5	21.6	21.8	21.9	20.5	21.4	20.5	20	21.3
	10	22.4	20.6	21.7	20	20	21	21.3	19.8	20.7	22	20.3	18.9	21.1	20.9	21	21	21	21.9	21.1	21.5	20	21.2	19.6	20.4
	12	20.9	20.5	20.5	22.2	20.6	21.4	20.4	21.4	21.5	19.9	20.6	22.6	21.4	21	20.4	21	21.9	20.8	21.4	20.5	21.3	20.5	20.5	19.5
