# Supplementary figures and images for: Elevated FBXO45 promotes liver tumorigenesis through enhancing IGF2BP1 ubiquitination and subsequent PLK1 upregulation
Source: eLife journal article supplement (doi:10.7554/elife.70715), 2021-11-15

**A**

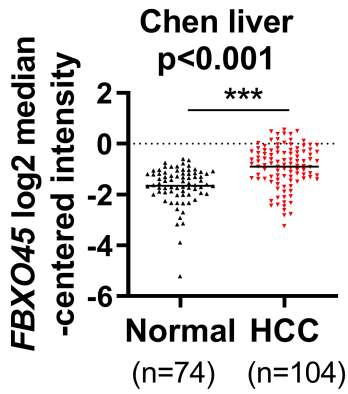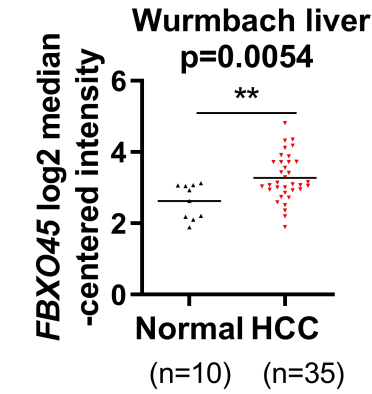

**B**

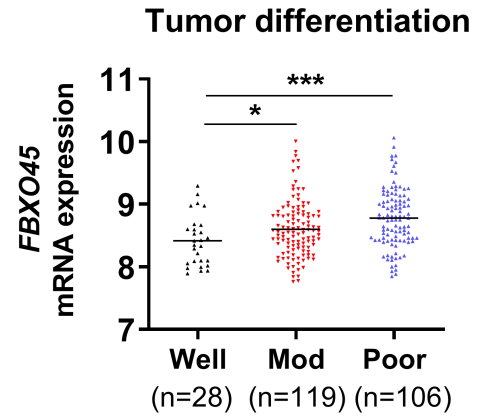

**C**

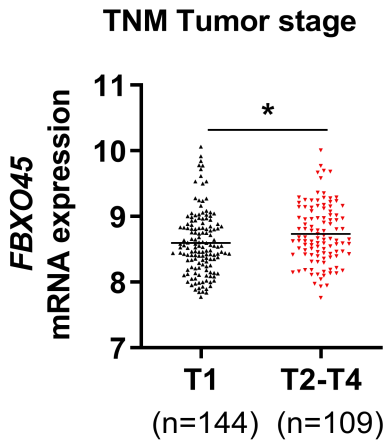

**D**

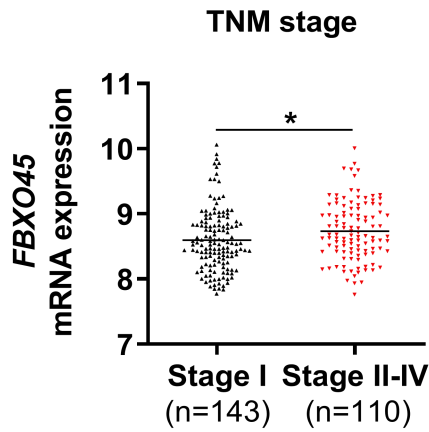

**E**

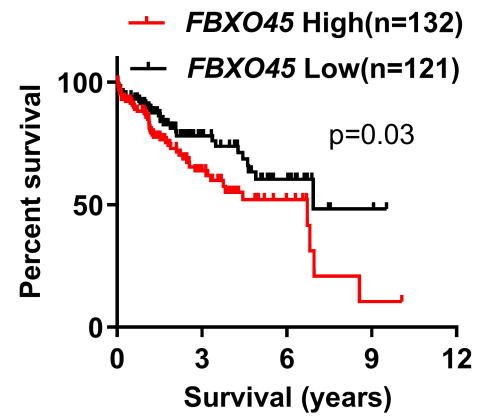

Supplement: supp [file elife-70715-supp-v1.zip › elife_poa_e70715_Figure_1_figure_supplement_1.pdf]

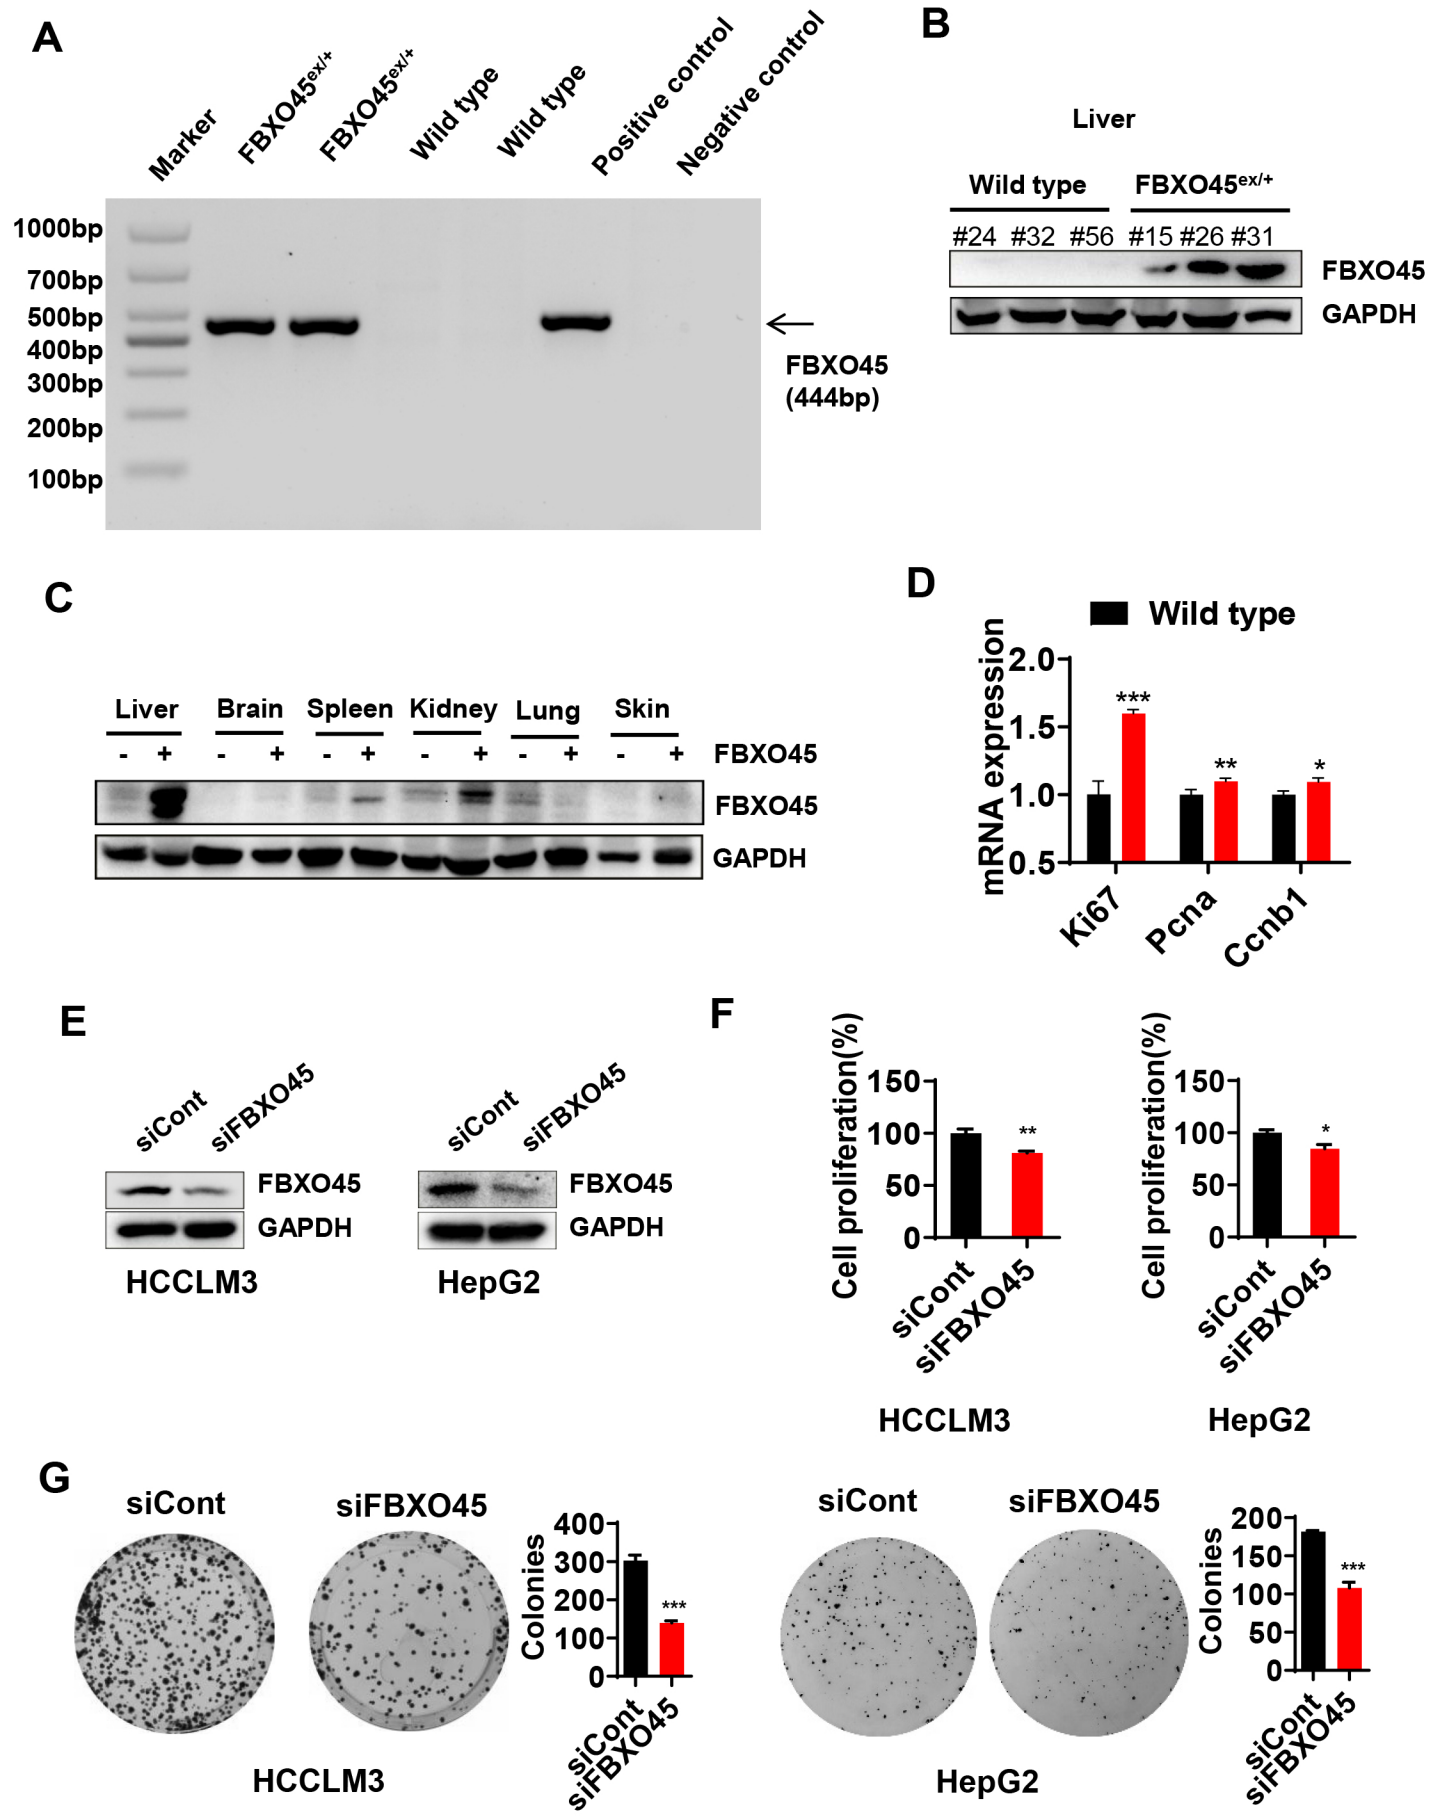

Supplement: supp [file elife-70715-supp-v1.zip › elife_poa_e70715_Figure_2_figure_supplement_1.pdf]

**A**

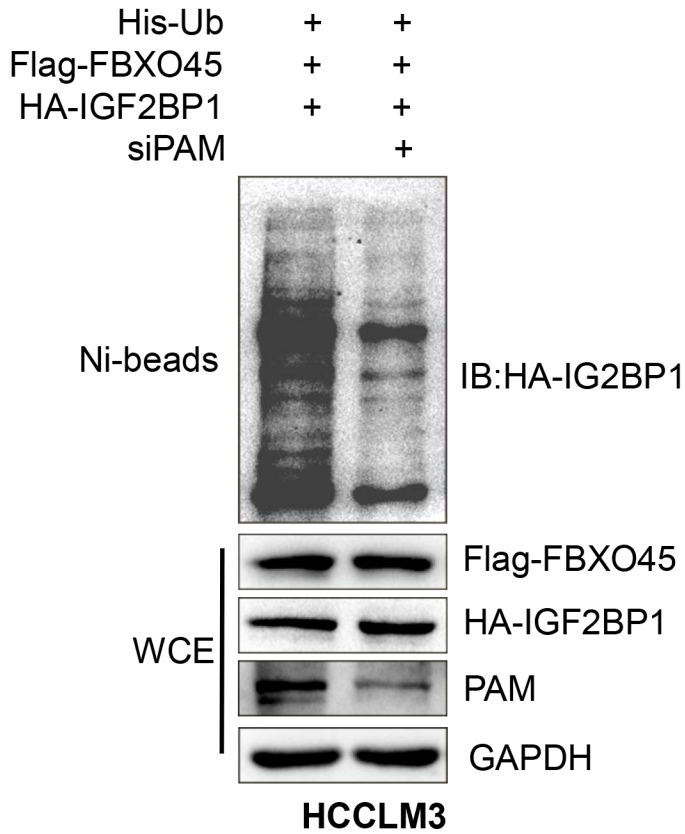

**B**

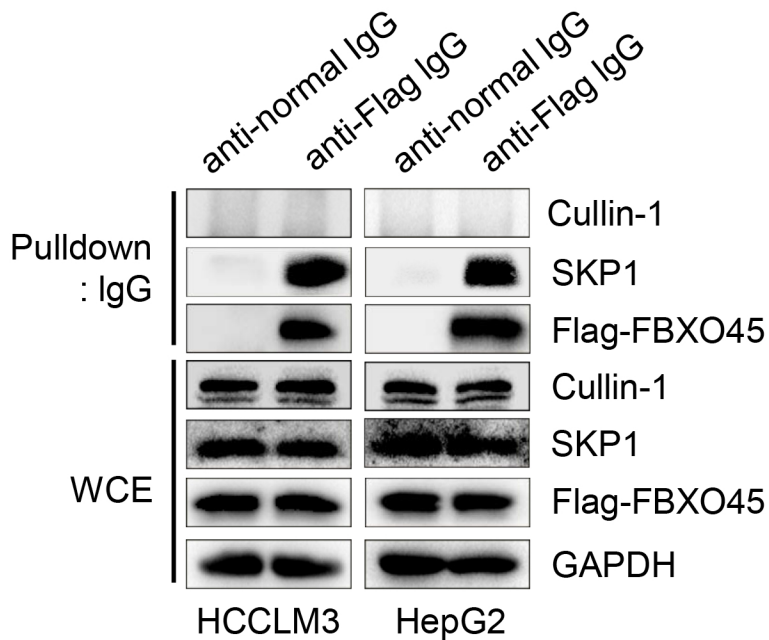

Supplement: supp [file elife-70715-supp-v1.zip › elife_poa_e70715_Figure_3_figure_supplement_2.pdf]

**A**

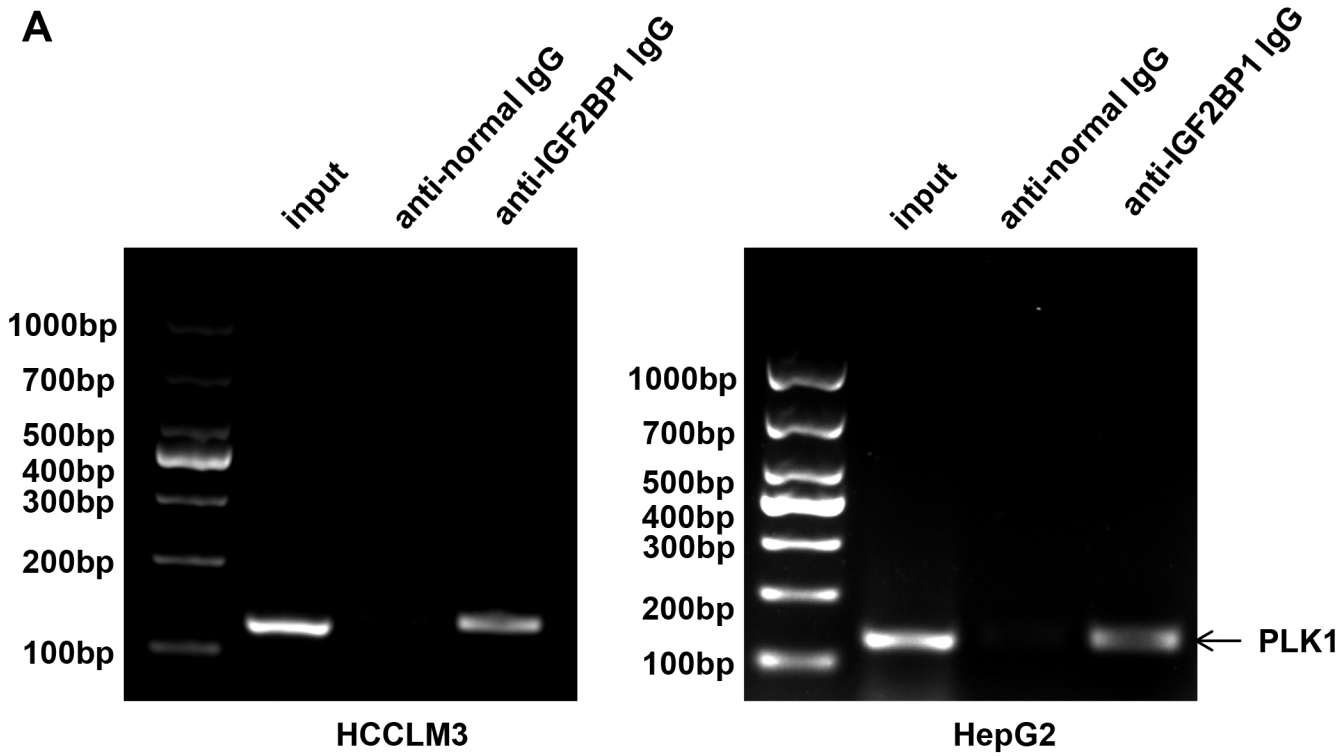

**B**

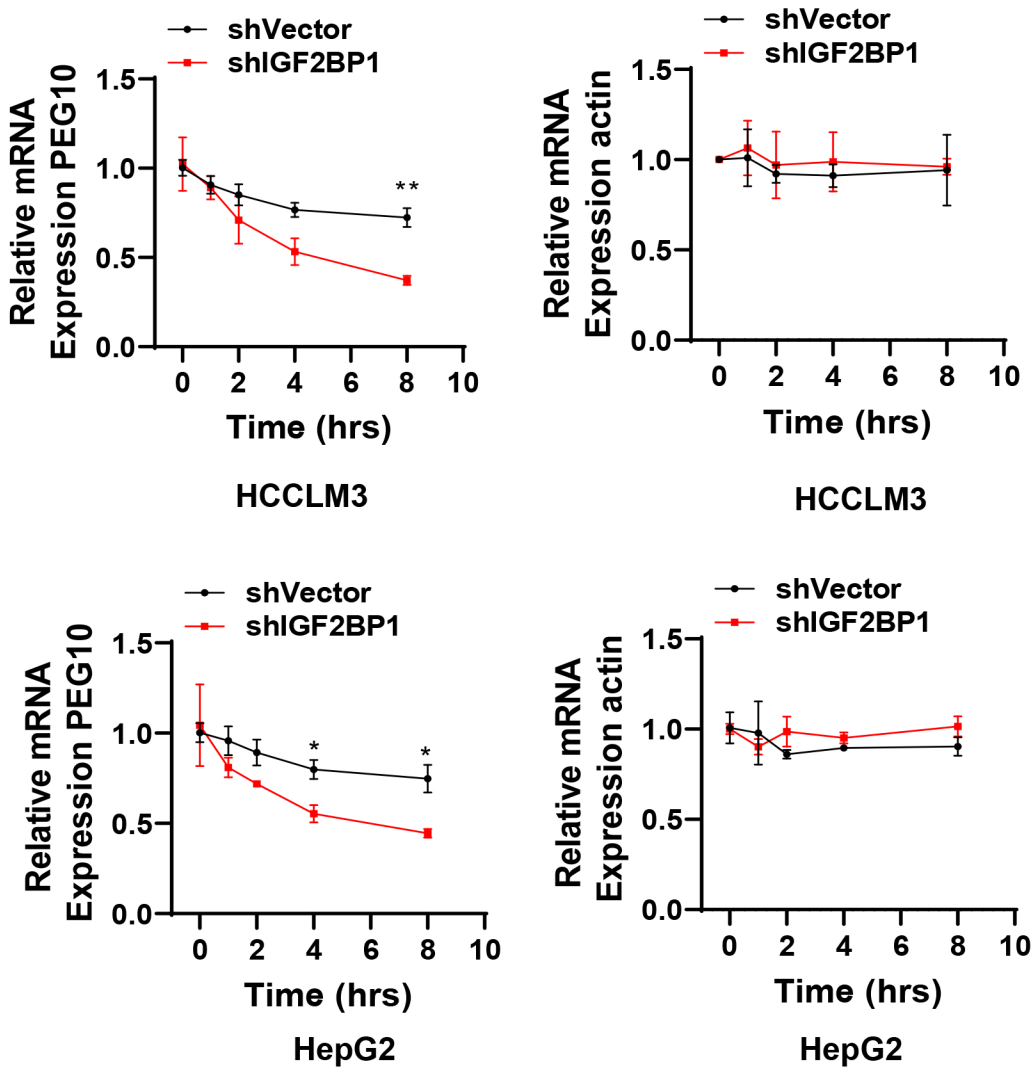

Supplement: supp [file elife-70715-supp-v1.zip › elife_poa_e70715_Figure_4_figure_supplement_1.pdf]

**A**

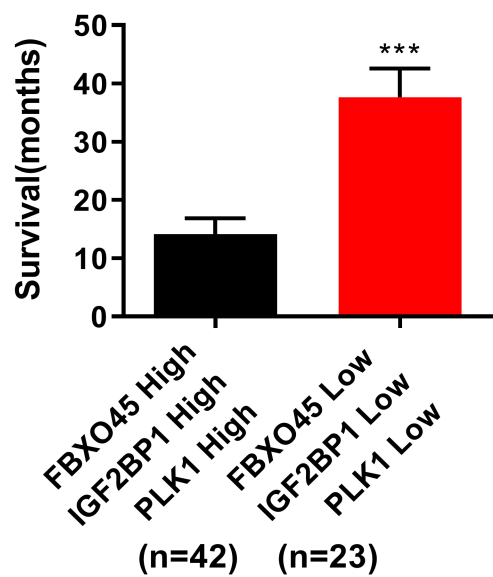

**B**

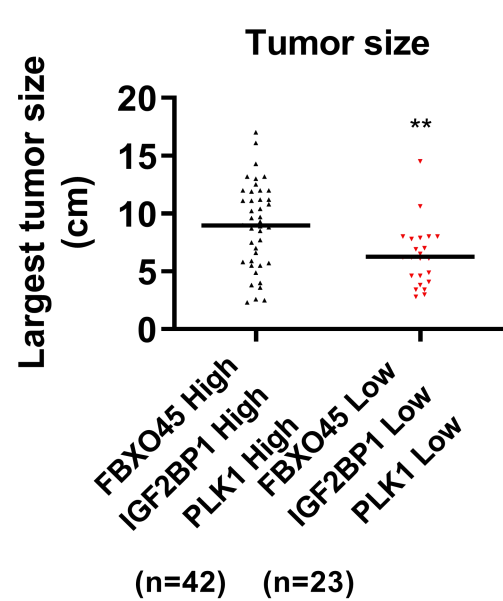

**C**

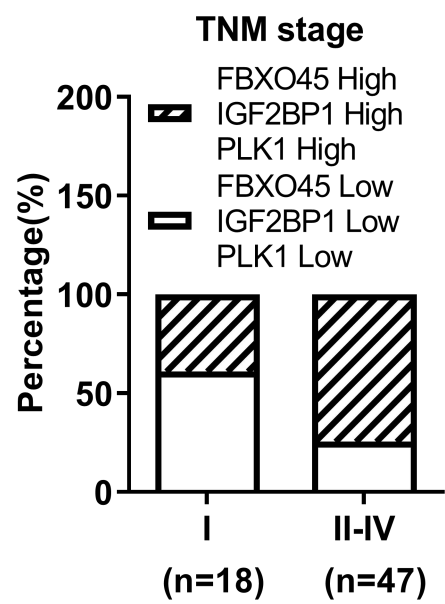

**D**

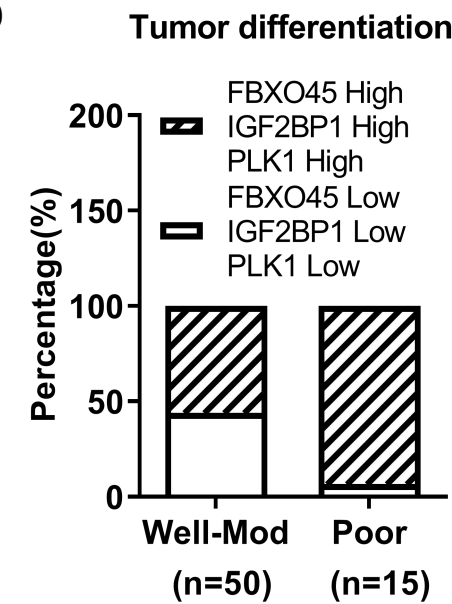

Supplement: supp [file elife-70715-supp-v1.zip › elife_poa_e70715_Figure_7_figure_supplement_1.pdf]
